# Supplementary material for: Omega-3, omega-6, and total dietary polyunsaturated fat for prevention and treatment of type 2 diabetes mellitus: systematic review and meta-analysis of randomised controlled trials
Source: PubMed Central journal article supplement — BMJ. 2019 Aug 21;366:l4697. doi: 10.1136/bmj.l4697 (PMC6699594; doi:10.1136/bmj.l4697), 2019-08-21
Supplement: brot048057.ww1.pdf [file brot048057.ww1.pdf]

# Supplementary materials for Brown et al.

## Increasing omega-3, omega-6, and total dietary polyunsaturated fat for prevention and treatment of type 2 diabetes mellitus: systematic review of randomised controlled trials

### Contents

|                                                                                                                     |    |
|---------------------------------------------------------------------------------------------------------------------|----|
| Supplementary Text. Results section in greater detail. ....                                                         | 7  |
| Effects of omega-3 .....                                                                                            | 7  |
| Effects of omega-6 .....                                                                                            | 13 |
| Effects of total PUFA .....                                                                                         | 14 |
| Secondary outcomes.....                                                                                             | 16 |
| Tables .....                                                                                                        | 17 |
| Supplementary Table A. Table of characteristics and risk of bias assessments for each of the included studies ..... | 17 |
| <b>AlphaOmega - ALA 2011</b> <sup>30-32</sup> .....                                                                 | 17 |
| <b>AlphaOmega - EPA+DHA</b> <sup>30-32</sup> .....                                                                  | 18 |
| <b>AREDS2 2014</b> <sup>3 33</sup> .....                                                                            | 19 |
| <b>ASCEND 2018</b> <sup>11 34</sup> .....                                                                           | 20 |
| <b>Balfego 2016</b> <sup>13</sup> .....                                                                             | 21 |
| <b>Baxheinrich 2012</b> <sup>35</sup> .....                                                                         | 22 |
| <b>Bonnema 1995</b> <sup>36</sup> .....                                                                             | 23 |
| <b>Burr 2003 - DART2</b> <sup>37</sup> .....                                                                        | 24 |
| <b>Caldwell 2011</b> <sup>4 12</sup> .....                                                                          | 25 |
| <b>Clark 2016</b> <sup>38</sup> .....                                                                               | 26 |
| <b>Connor 1993</b> <sup>39 40</sup> .....                                                                           | 27 |
| <b>DART fat 1989</b> <sup>20 41 42</sup> .....                                                                      | 28 |

|                                                  |    |
|--------------------------------------------------|----|
| <b>DART fish 1989</b> <sup>20 41 42</sup> .....  | 29 |
| <b>Dasarathy 2015</b> <sup>43</sup> .....        | 30 |
| <b>de Luis 2016</b> <sup>44</sup> .....          | 31 |
| <b>DeFina 2010</b> <sup>45</sup> .....           | 32 |
| <b>Delamaire 1991</b> <sup>46</sup> .....        | 33 |
| <b>Derosa 2009</b> <sup>47</sup> .....           | 34 |
| <b>Derosa 2011</b> <sup>48 49</sup> .....        | 35 |
| <b>Derosa 2016</b> <sup>5</sup> .....            | 36 |
| <b>Deslypere 1992</b> <sup>50-52</sup> .....     | 37 |
| <b>DIPP-Tokudome 2015</b> <sup>53 54</sup> ..... | 38 |
| <b>DO IT - Einvik 2010</b> <sup>55</sup> .....   | 39 |
| <b>Dodin 2005</b> <sup>56 57</sup> .....         | 40 |
| <b>Dullaart 1992</b> <sup>19</sup> .....         | 41 |
| <b>Ebrahimi 2009</b> <sup>58 59</sup> .....      | 42 |
| <b>EPE-A 2014</b> <sup>60</sup> .....            | 43 |
| <b>EPOCH 2014</b> <sup>6 61</sup> .....          | 44 |
| <b>Fakhrzadeh 2010</b> <sup>62 63</sup> .....    | 46 |
| <b>Ferrara 2000</b> <sup>21</sup> .....          | 46 |
| <b>Finnegan 2003</b> <sup>64</sup> .....         | 47 |
| <b>Gill 2012</b> <sup>65 66</sup> .....          | 48 |
| <b>GISSI-P 1999</b> <sup>67 68</sup> .....       | 49 |
| <b>GLAMT 1993</b> <sup>69</sup> .....            | 50 |

|                                                       |    |
|-------------------------------------------------------|----|
| <b>Heine 1989</b> <sup>22</sup> .....                 | 51 |
| <b>HERO-Tapsell 2009</b> <sup>14 70</sup> .....       | 52 |
| <b>Houtsmuller 1979</b> <sup>71-74</sup> .....        | 53 |
| <b>IFOMS- Sirtori 1997</b> <sup>75-77</sup> .....     | 54 |
| <b>JELIS 2007</b> <sup>78 79</sup> .....              | 55 |
| <b>Krebs 2006</b> <sup>80</sup> .....                 | 56 |
| <b>Lalia 2015</b> <sup>81</sup> .....                 | 57 |
| <b>Martinez 2014</b> <sup>82</sup> .....              | 58 |
| <b>MENU - Rock 2016</b> <sup>83 84</sup> .....        | 59 |
| <b>Mita 2007</b> <sup>85</sup> .....                  | 60 |
| <b>Moore 2006</b> <sup>24</sup> .....                 | 61 |
| <b>MUFFIN Miller 2016</b> <sup>18</sup> .....         | 62 |
| <b>Nigam 2014</b> <sup>86</sup> .....                 | 63 |
| <b>Niki 2016</b> <sup>87</sup> .....                  | 64 |
| <b>Nodari 2011 HF</b> <sup>88</sup> .....             | 65 |
| <b>Nogueira 2016</b> <sup>89 90</sup> .....           | 66 |
| <b>Nomura 2009</b> <sup>91</sup> .....                | 67 |
| <b>Norwegian - Natvig 1968</b> <sup>92 93</sup> ..... | 67 |
| <b>OFAMI - Nilsen 2001</b> <sup>94</sup> .....        | 68 |
| <b>OPAL - Dangour 2010</b> <sup>7 95-97</sup> .....   | 69 |
| <b>OPTILIP 2006</b> <sup>98 99</sup> .....            | 70 |
| <b>ORIGIN 2012</b> <sup>100-103</sup> .....           | 71 |

|                                                            |    |
|------------------------------------------------------------|----|
| <b>ORL - Tatsuno 2013</b> <sup>104</sup> .....             | 73 |
| <b>Patch 2005</b> <sup>105 106</sup> .....                 | 74 |
| <b>Pratt 2009</b> <sup>107 108</sup> .....                 | 74 |
| <b>PREDIMED 2013</b> <sup>25 109-121</sup> .....           | 75 |
| <b>Proudman 2015</b> <sup>9 123 124</sup> .....            | 77 |
| <b>REDUCE-IT 2018</b> <sup>125 126</sup> .....             | 78 |
| <b>Risk &amp; Prevention 2013</b> <sup>127 128</sup> ..... | 79 |
| <b>Rose 1965</b> <sup>23</sup> .....                       | 80 |
| <b>Rossing 1996</b> <sup>129 130</sup> .....               | 81 |
| <b>Sandhu 2016</b> <sup>131 132</sup> .....                | 82 |
| <b>Sasaki 2012</b> <sup>133</sup> .....                    | 84 |
| <b>Sawada 2016</b> <sup>134</sup> .....                    | 84 |
| <b>Schirmer 2007</b> <sup>135</sup> .....                  | 85 |
| <b>Shimizu 1995</b> <sup>136</sup> .....                   | 86 |
| <b>SHOT - Eritsland 1996</b> <sup>137-146</sup> .....      | 87 |
| <b>SMART Tapsell 2013</b> <sup>147-149</sup> .....         | 88 |
| <b>Smith 2015</b> <sup>150</sup> .....                     | 90 |
| <b>Sofi 2010</b> <sup>151</sup> .....                      | 91 |
| <b>Spadaro 2008</b> <sup>152</sup> .....                   | 91 |
| <b>Tande 2016</b> <sup>153</sup> .....                     | 92 |
| <b>Tapsell 2004</b> <sup>154 155</sup> .....               | 94 |
| <b>Tardivo 2015</b> <sup>156</sup> .....                   | 94 |

|                                                                                                             |     |
|-------------------------------------------------------------------------------------------------------------|-----|
| <b>THIS DIET 2008</b> <sup>157</sup> .....                                                                  | 95  |
| <b>Veleba 2015</b> <sup>158</sup> .....                                                                     | 97  |
| <b>Vijayakumar 2014</b> <sup>17 159 160</sup> .....                                                         | 98  |
| <b>Wang 2016</b> <sup>161</sup> .....                                                                       | 99  |
| <b>WELCOME 2014</b> <sup>162-166</sup> .....                                                                | 100 |
| <b>Witte 2012</b> <sup>167-169</sup> .....                                                                  | 101 |
| <b>Zheng 2016</b> <sup>170-172</sup> .....                                                                  | 102 |
| Supplementary Table B. Effect of higher vs lower LCn3 on diagnosis of T2DM .....                            | 105 |
| Supplementary Table C. Effect of higher vs lower LCn3 on HbA1c, % .....                                     | 107 |
| Supplementary Table D. Effect of higher vs lower LCn3 on HOMA-IR .....                                      | 109 |
| Supplementary Table E. Effect of higher vs lower LCn3 on fasting insulin, pmol/L .....                      | 111 |
| Supplementary Table F. Effect of higher vs lower LCn3 on fasting plasma glucose, mmol/L .....               | 113 |
| Supplementary Table G. Effect of higher vs lower ALA on diagnosis of type 2 diabetes .....                  | 115 |
| Supplementary Table H. Effect of higher vs lower ALA on HbA1c, % .....                                      | 115 |
| Supplementary Table I. Effect of higher vs lower ALA on HOMA-IR.....                                        | 116 |
| Supplementary Table J. Effect of higher vs lower ALA on fasting insulin, pmol/L.....                        | 116 |
| Supplementary Table K. Effect of higher vs lower ALA on fasting plasma glucose, mmol/L.....                 | 117 |
| Supplementary Table L. Effects of omega-3 compared to more omega-6 on primary outcomes .....                | 117 |
| Supplementary Table M. Effects of higher vs lower LCn3 on secondary outcomes within this review. ....       | 118 |
| Supplementary Table N. Effects of higher vs lower ALA on secondary outcomes within this review. ....        | 119 |
| Supplementary Table O. Effect of higher vs lower omega-6 on diagnosis of type 2 diabetes .....              | 120 |
| Supplementary Table P. Effect of higher vs lower omega-6 on HbA1c, % .....                                  | 120 |
| Supplementary Table Q. Effect of higher vs lower omega-6 on HOMA-IR.....                                    | 121 |
| Supplementary Table R. Effect of higher vs lower omega-6 on fasting insulin, mmol/L.....                    | 121 |
| Supplementary Table S. Effect of higher vs lower omega-6 on fasting glucose, mmol/L .....                   | 122 |
| Supplementary Table T. Effects of higher vs lower omega-6 on secondary outcomes within this review. ....    | 122 |
| Supplementary Table U. Effect of higher vs lower total PUFA on diagnosis of type 2 diabetes .....           | 123 |
| Supplementary Table V. Effect of higher vs lower total PUFA on HbA1c, % .....                               | 123 |
| Supplementary Table W. Effect of higher vs lower total PUFA on HOMA-IR .....                                | 124 |
| Supplementary Table X. Effect of higher vs lower total PUFA on fasting insulin, mmol/L.....                 | 124 |
| Supplementary Table Y. Effect of higher vs lower total PUFA on fasting glucose, mmol/L .....                | 125 |
| Supplementary Table Z. Effects of higher vs lower total PUFA on secondary outcomes within this review. .... | 125 |

|                                                                                                                                                                                                                                                                                                          |     |
|----------------------------------------------------------------------------------------------------------------------------------------------------------------------------------------------------------------------------------------------------------------------------------------------------------|-----|
| Supplementary Figures .....                                                                                                                                                                                                                                                                              | 126 |
| Supplementary Figure A. Risk of bias summary: review authors' judgements about each risk of bias item for each included study.....                                                                                                                                                                       | 126 |
| Supplementary Figure B. Meta-analysis of effects of LCn3 on type 2 diabetes diagnosis. Sensitivity analysis by summary risk of bias. ....                                                                                                                                                                | 129 |
| Supplementary Figure C. Meta-analysis of effects of LCn3 on type 2 diabetes diagnosis. Sensitivity analysis by summary risk of bias, omitting Derosa 2016. ....                                                                                                                                          | 130 |
| Supplementary Figure D. Funnel plot of effects of LCn3 on type 2 diabetes diagnosis. Several small trials with results suggesting that increased LCn3 is associated with reduced risk of diabetes diagnosis may be missing. Adding these trials back in would tend to reduce the RR a small amount. .... | 131 |
| Supplementary Figure E. Meta-analysis of effects of LCn3 on type 2 diabetes diagnosis. Subgroup analysis assessing effects by baseline diabetes risk .....                                                                                                                                               | 132 |
| Supplementary Figure F. Meta-analysis of effects of LCn3 on risk of type 2 diabetes diagnosis, subgrouping by trial duration. ....                                                                                                                                                                       | 133 |
| Supplementary Figure G. Meta-analysis of effects of LCn3 on risk of type 2 diabetes diagnosis, subgrouping by LCn3 dose.....                                                                                                                                                                             | 134 |
| Supplementary Figure H. Meta-analysis of effects of LCn3 on risk of type 2 diabetes diagnosis, subgrouping by type of intervention. ....                                                                                                                                                                 | 135 |
| Supplementary Figure I. Meta-analysis of effects of LCn3 on risk of type 2 diabetes diagnosis, subgrouping by macronutrient replaced by LCn3. ....                                                                                                                                                       | 136 |
| Supplementary Figure J. Funnel plot of effects of LCn3 on HbA1c. This is difficult to interpret, but does not clearly suggest publication bias. ....                                                                                                                                                     | 137 |
| Supplementary Figure K. Meta-analysis of effects of LCn3 on HbA1c, %, subgrouping by trial duration. ....                                                                                                                                                                                                | 138 |
| Supplementary Figure L. Meta-analysis of effects of LCn3 on HbA1c, %, subgrouping by LCn3 dose. ....                                                                                                                                                                                                     | 139 |
| Supplementary Figure M. Meta-analysis of effects of LCn3 on HbA1c, %, subgrouping by intervention type....                                                                                                                                                                                               | 140 |
| Supplementary Figure N. Meta-analysis of effects of LCn3 on HbA1c, %, subgrouping by baseline risk of diabetes.....                                                                                                                                                                                      | 141 |
| Supplementary Figure O. Meta-analysis of effects of LCn3 on HbA1c, %, subgrouping by intervention type. ...                                                                                                                                                                                              | 142 |
| Supplementary Figure P. Meta-analysis of effects of LCn3 on HOMA-IR, sensitivity analysis by study size ( $\geq 100$ participants randomised).....                                                                                                                                                       | 143 |
| Supplementary Figure Q. Funnel plot of effects of LCn3 on HOMA-IR, suggesting that some trials where raising LCn3 increased HOMA-IR may be missing. Adding these trials in would tend to increase the mean difference. ....                                                                              | 144 |
| Supplementary Figure R. Funnel plot of effects of LCn3 on fasting serum insulin, difficult to interpret but suggesting little publication bias.....                                                                                                                                                      | 145 |
| Supplementary Figure S. Meta-analysis of effects of LCn3 on fasting serum insulin, subgrouping by trial duration. While there are statistically significant differences between subgroups there is no trend (effects neither strengthen nor weaken as trials lengthen). ....                             | 146 |
| Supplementary Figure T. Funnel plot of effects of LCn3 on fasting glucose, difficult to interpret but suggesting little publication bias.....                                                                                                                                                            | 147 |
| References .....                                                                                                                                                                                                                                                                                         | 148 |

## Supplementary Text. Results section in greater detail.

### Description of studies

We included 83 RCTs that measured at least one of our primary outcomes, of the 311 completed trials in our database <sup>1</sup>. These 83 RCTs (85 comparisons) had randomised 121,070 participants. Their characteristics, risk of bias assessments and bibliographic references are detailed in Additional Table 1.

Of these 83 RCTs, ten were assessed as at low summary risk of bias: <sup>2-11</sup> at low risk for random sequence generation, allocation concealment, and blinding of outcome assessment in dietary trials, and in supplement-type trials additionally at low risk for blinding of participants and personnel, see Additional Figure 1.

Half the studies were conducted in Europe (41), 16 in North America; 3 in South America; 15 in Asia; 6 in Australia, and two in locations across at least 2 continents. 26 studies specifically recruited participants with diabetes or impaired glucose metabolism (of which one recruited type 1 diabetics). We attempted to contact authors of 52 included trials, of which we received information on methodology and/or results relating to 36 trials (see acknowledgements).

### Effects of omega-3

Sixty six trials assessed effects of LCn3 of which ten were at low summary risk of bias. Twelve trials assessed effects of ALA, of which five also assessed LCn3 in separate arms, and of which a single trial was at low summary risk of bias.<sup>2</sup> Nineteen trials compared omega-3 with omega-6 fats of which one was at low summary risk of bias.<sup>12</sup> GRADE summary of findings are shown in Table 1 (main paper), full details of LCn3 analyses, including sensitivity analyses and subgrouping are in Additional Tables 2 to 6, ALA analyses in Additional Tables 7 to 11, comparing increased omega-3 to increased omega-6 in Additional Table 12 and secondary outcomes in Additional Tables 13 and 14.

### Effect of omega-3 on diagnosis of diabetes and pre-diabetes

LCn3 may have little or no effect on risk of diagnosis of T2DM (low-quality evidence, downgraded once each for imprecision and publication bias). Seventeen trials randomised participants to LCn3 or control for at least 24 weeks and reported at least one new diagnosis of diabetes. Over 58,000

participants were included, and 2196 diabetes diagnoses recorded, with little or no effect of LCn3 on diagnosis risk (RR 1.00, 95% CI 0.85 to 1.17,  $I^2$  45%, Figure 1). This did not differ when restricted to trials of  $\geq 12$  months (RR 1.01, 95% CI 0.86 to 1.19,  $I^2$  47%, 2185 diagnoses, 58535 participants in 15 trials).

Sensitivity analyses using fixed effects meta-analysis or limiting to larger trials, trials with trials registry entries, and those at low risk from compliance confirmed little or no effect. Sensitivity analyses only including studies at low summary risk of bias (RR 0.76, 95% CI 0.49 to 1.19,  $I^2$  72%, Additional Table 2), as well as trials with no industry funding suggested protection from diabetes diagnosis though with very wide confidence intervals that included both benefit and harm from increased LCn3. The suggested benefit was due to a single trial<sup>5</sup> of 258 participants with baseline impaired fasting glucose or glucose intolerance randomised to 18 months of LCn3 or placebo, reporting 7 developing diabetes in the intervention arm, 38 in control (data verified with study authors, Additional Figures 2 & 3).

The funnel plot suggested that some smaller studies with reduced incidence of diabetes diagnosis with LCn3 may be missing, however formal statistical tests did not suggest important bias, although they are of low power to detect bias (Begg's test  $p=0.537$ , Harbord's test  $p=0.950$ , Peter's test  $p=0.134$ ). We are not aware of missing studies (Additional Figure 4).

There were no significant differences between subgroups when subgrouping by LCn3 dose, type of intervention, replacement, age, sex, baseline diabetes risk (Additional Figure 5), use of diabetic medication or duration (Additional Table 2). The lack of suggestion of dose or duration effects undermines belief in a true effect (Additional Figures 6-7). There was no suggestion that effects differed by whether the intervention was dietary fish or fish oil capsules (though evidence on effects of dietary advice on eating oily fish was very limited), or whether the LCn3 was replacing monounsaturated fats, omega-6, carbohydrate or other non-fat placebos (Additional Figures 8-9).

Effects of ALA on diabetes diagnosis are uncertain as the evidence is of very low-quality (downgraded once for inconsistency and twice for imprecision). Two RCTs randomising 18,243 participants to ALA or control reported 230 new diabetes diagnoses with a risk ratio of 0.68 (95% CI 0.33 to 1.39,  $I^2$  59%). This did not alter greatly in fixed effects analysis, limiting to the single trial at low summary risk of bias or at low risk from compliance bias. One trial was 12 months, the other 40 months duration (Additional Table 7). We are not aware of any missing studies.

We considered the subgroup of studies which replaced omega-6 with omega-3 with particular interest as, if the theory that omega-3 and omega-6 fats have opposing roles is correct, we would expect to see strongest effects when omega-3 replaces dietary omega-6. As the data were very



weak (limited events, no trials at low summary risk of bias, confidence intervals including important benefits and harms) the effect of replacing omega-6 with omega-3 fats on diabetes diagnosis is unclear (RR 0.67, 95% CI 0.35 to 1.28,  $I^2$  5%, 43 diagnoses in 14,002 participants, three trials, Additional Table 12).

We found no RCTs that assessed effects of LCn3 or ALA on pre-diabetes diagnosis.

### **Effect of omega-3 on glycated haemoglobin**

LCn3 probably has little or no effect on glycated haemoglobin (HbA1c, moderate level evidence, downgraded once for risk of bias). Data from 32,798 participants suggested no effect of LCn3 on HbA1c (MD -0.02%, 95% CI -0.07 to 0.04,  $I^2$  49%, 17 comparisons, mean baseline HbA1c was 6.5% Figure 2). This lack of effect was not altered in fixed effects meta-analysis or other sensitivity analyses (Additional Table 3). No meta-analysis of trials at low summary risk of bias was possible, but the single trial at low summary risk of bias,<sup>8</sup> reported the same median value in both arms. Limiting to RCTs of  $\geq 12$  months duration did not alter the lack of effect on HbA1c (MD -0.00%, 95% CI -0.07 to 0.06,  $I^2$  68%). All but one of the included studies,<sup>13</sup> gave supplementary capsules.

Data from 14 further trials were missing (with baseline inequalities or data collected but not fully reported, 7 of which are shown in Figure 2 and confirm lack of effect on HbA1c). The funnel plot did not suggest publication bias (Additional Figure 10), and this was borne out by formal statistical tests (Egger's test  $p=0.977$ , Begg's test  $p=0.902$ )

There were no dose or duration effects (Additional Figures 11-12), but there were statistically significant differences ( $p=0.01$ ) between subgroups by baseline diabetes risk (no effect in the general population, a small reduction of HbA1c in those at risk of diabetes, and an equivalent small increase in HbA1c in those with existing diabetes, Additional Figure 13). However, only two small trials included 172 participants at increased diabetes risk, and three further trials were not included in analysis due to missing variance data. Two of these suggested exactly the same HbA1c in intervention and control arms, the other suggested slightly higher HbA1c in the intervention arm, so these trials contradict the results of the meta-analysis. After imputing standard deviations for the missing trials, the difference between subgroups by baseline diabetes risk was no longer statistically significant ( $p=0.21$ ). There was a statistically significant difference between subgroups by replacement (replacement of omega-6 by LCn3 suggested a small but statistically significant HbA1c reduction (MD -0.15%, 95% CI -0.24 to -0.06,  $I^2$  0%, in 841 participants, Additional Figure 14). This was interpreted as little or no effect as this represented a  $<5\%$  change from baseline. One further study reported data (unsuitable for pooled analysis) suggesting higher

HbA1c in the omega-3 arm (contradicting the effects in pooled analysis). There were no other statistically significant differences between subgroups.

ALA may have little or no effect on HbA1c (low-quality evidence, downgraded once each for risk of bias and imprecision). Three RCTs suggested no effect on HbA1c (MD 0.01%, 95% CI -0.43 to 0.45,  $I^2$  0%, 178 participants, mean baseline HbA1c 7.0%), and we are not aware of any missing studies. This lack of effect was not altered by fixed effects analysis, or limiting to trials at low risk from compliance, but no included studies were at low summary risk of bias. Further sensitivity analyses and subgrouping were not carried out (Additional Table 8). Limiting to trials of  $\geq 12$  months, a single study remained <sup>14</sup>, suggesting that increasing ALA may increase HbA1c (MD 0.40%, 95% CI -0.59 to 1.39) but with wide confidence intervals.

As mentioned above, there was little or no effect of omega-3 vs omega-6 on glycated haemoglobin (MD -0.15%, 95% CI -0.24 to -0.06,  $I^2$  0%, 841 participants, six trials, Additional Table 12) as all of the confidence interval suggested change of  $< 5\%$  of baseline. No included trials were at low summary risk of bias.

### **Effect of omega-3 on HOMA-IR**

LCn3 may have little or no effect on HOMA-IR (low-quality evidence, downgraded once each for imprecision and publication bias). HOMA-IR is a measure of insulin resistance that takes both fasting insulin and fasting glucose into account. Lower HOMA-IR, like lower glucose, HbA1c or insulin levels, indicates better glucose control. Thirteen trials randomising 1064 participants included HOMA-IR data in pooled analysis, while four further trials provided data without variance and three trials were unsuitable for pooling (due to baseline differences). There was little effect on HOMA-IR (MD 0.06, 95% CI -0.21 to 0.33,  $I^2$  18%, mean baseline HOMA-IR was 4.6, Figure 5).

Sensitivity analyses did not suggest different results except when limiting studies to those that randomised  $\geq 100$  participants, in which the three larger trials suggested a reduction in HOMA-IR with increased LCn3 (MD -1.15, 95% CI -2.61 to 0.30,  $I^2$  0%, 697 participants, Additional Figure 16, Additional Table 4). However of the three larger trials that could not be included in the meta-analysis two suggested higher HOMA-IR in the LCn3 arms, and one suggested the same HOMA-IR level. There were no statistically significant differences between any sets of subgroups, and no suggestion of differential effects by dose or duration.

We downgraded for risk of bias due to different effects of the larger trials, and surprising weightings of individual studies in the meta-analyses, suggesting that there may be some data problems. The funnel plot suggests that studies with higher HOMA-IR in the LCn3 arm may be

missing (Additional Figure 17), though this was not supported by formal statistical tests (Egger's test  $p=0.187$ , Begg's test  $p=0.951$ )

ALA may have little or no effect on HOMA-IR (low-quality evidence, downgraded once for imprecision and once for risk of bias and publication bias combined). Four trials assessed the effects of ALA on HOMA, three of which were pooled (MD 0.10, 95% CI -0.50 to 0.70,  $I^2$  0%, 294 participants, mean baseline HOMA-IR was 3.4). The suggestion of little or no effect did not alter with fixed effects analysis or limiting to trials at low risk of compliance problems, but no included trials were at low summary risk of bias. The study not included in meta-analysis suggested slightly increased HOMA-IR with increased LCn3.

There was little or no reduction in HOMA-IR with omega-3 vs omega-6 (MD -0.23, 95%CI -1.35 to 0.88,  $I^2$  60%, 328 participants, 6 comparisons). Three further RCTs reported data unsuitable for pooling, two of which suggested higher HOMA-IR with increased omega-3, as did the single trial at low summary risk of bias. Data were of very low-quality.

### **Effect of omega-3 on fasting insulin**

LCn3 may have little or no effect on fasting insulin (low-grade evidence, downgraded once each for risk of bias and imprecision). Seventeen trials suggested little or no effect of supplementation of LCn3 over  $\geq 6$  months on fasting serum insulin (MD 1.02 pmol/L, 95% CI -4.34 to 6.37,  $I^2$  43%, 2077 participants, mean baseline insulin 98 pmol/L; Figure 4), but we are aware of fifteen further missing studies, although the funnel plot did not suggest missing data (Additional Figure 18, Egger's test  $p=0.976$ , Begg's test  $p=0.711$ ).

This lack of effect did not alter with fixed effects meta-analysis, or limiting to low risk of compliance, or other sensitivity analyses, but limiting to trials at low summary risk of bias suggested increased fasting serum insulin with increased LCn3 (MD 25.27 pmol/L, 95% CI 4.11 to 46.4,  $I^2$  0%, 387 participants, Additional Table 5). There were no statistically significant differences between subgroups except for sex ( $p=0.03$ ), diabetic medication use ( $p=0.02$ ) and duration ( $p=0.04$ ) where the single trial in which most participants used diabetic medication and the single trial with a duration of 2-4 years both suggested a significant reduction in insulin with increased LCn3. Subgrouping by sex suggested similar effects in the single trials of men and women, with a different effect in men and women combined, which does not suggest differential effects by sex. Similarly there was no suggestion that as trial duration lengthened fasting insulin increased or decreased with increasing LCn3 (Additional Figure 19).

ALA may increase fasting insulin (low-quality evidence, downgraded once each for risk of bias and imprecision). Eight trials assessed effects of ALA on fasting serum insulin, six of which were

pooled, suggesting increased fasting insulin (MD 5.3 pmol/L, 95% CI -4.68 to 15.27,  $I^2$  0%, 469 participants) of 7% from 80pmol/L at baseline. This did not alter in fixed effects analysis or limiting to trials at low risk from compliance bias, but no trials were at low summary risk of bias. Other sensitivity analyses and subgroupings were not carried out as there were too few trials.

Data comparing omega-3 to omega-6 on fasting insulin were highly heterogeneous, with unimportant insulin reductions (MD -3.23 pmol/L, 95% CI -21.73 to 15.28,  $I^2$  67%, 690 participants in 8 comparisons, Additional Table 12). Six RCTs had data unsuitable for pooling, while the single trial at low summary risk of bias suggested increased insulin with higher omega-3. Data were of very low-quality.

### **Effect of omega-3 on fasting glucose**

LCn3 may have little or no effect on fasting serum or plasma glucose (low-quality evidence, downgraded once each for risk of bias and publication bias). Forty eight trials (33 contributing to meta-analysis), assessed effects of increasing LCn3 on fasting serum or plasma glucose. Pooling suggested little or no effect - a statistically significant glucose increase from baseline of <1% (MD 0.04 mmol/L, 95% CI 0.02 to 0.07,  $I^2$  0%, 35,156 participants, mean baseline glucose 6.2 mmol/L, Figure 3). There was little or no effect using fixed effects meta-analysis or when limiting to studies at low risk from compliance, larger trials, registered trials and those without industry funding, Additional Table 6. The two studies at low summary risk of bias suggested reduction in glucose with increased LCn3 but with very wide confidence intervals (MD -0.45mmol/L, 95% CI -1.49 to 0.59,  $I^2$  54%, 353 participants).

The funnel plot did not suggest publication bias (Additional Figure 20), and neither did the formal tests (Egger's test  $p=0.205$ , Begg's test  $p=0.273$ ) but we are aware of 15 further studies (some of which are shown in Figure 3). Almost 70% of the weight in this analysis came from a single large trial, JELIS,<sup>15</sup> with longer duration than most included trials (five years) and suggested slight but unimportant glucose increases with LCn3. There were no significant differences between subgroups for dose, age, sex, type of intervention, replacement, diabetic medication use, baseline diabetes risk or duration (Additional Table 6).

ALA probably has little or no effect on fasting glucose (moderate-quality evidence, downgraded once for risk of bias). Nine trials assessed effects of ALA on fasting serum glucose, of which seven contributed to meta-analysis (MD -0.07mmol/L glucose, 95% CI -0.16 to 0.02,  $I^2$  0%, 648 participants, mean baseline glucose 6.2 mmol/L, one missing trial also suggesting slightly lower glucose in the higher ALA arm and the other was unclear, Figure 5). Sensitivity analyses by fixed effects and low risk from compliance did not differ from the main analysis, but no included trials

were at low summary risk of bias (Additional Table 11). There were no statistically significant differences between subgroups and too few trials to interpret the funnel plot.

There was little or no effect of increasing omega-3 vs omega-6 on fasting plasma glucose (MD -0.03 mmol/L, 95% CI -0.11 to 0.05,  $I^2$  10%, 1641 participants, 14 comparisons, none of which were at low summary risk of bias, Additional Table 12). Five further studies provided unusable data.

## **Effects of omega-6**

Eleven trials compared omega-6 with something other than omega-3, so were included in this comparison. Because none of the eleven trials were at low summary risk of bias, all outcomes were downgraded for risk of bias. No outcomes included at least ten trials, so we did not carry out additional sensitivity analyses, subgrouping or funnel plots. Figures 1 to 5 (main paper) show meta-analysis forest plots, Table 2 (main paper) shows GRADE summary of findings, while full details of omega-6 analyses on primary outcomes, including sensitivity analyses, are in Additional Tables 15 to 20.

### **Effect of omega-6 on diagnosis of diabetes or pre-diabetes**

Effects of omega-6 fats on T2DM diagnosis are unclear as quality of evidence was very low (downgraded once for risk of bias, twice for imprecision). Two RCTs randomised 2087 participants to omega-6 fats or control and reported three new diagnosis of diabetes (Figure 1). This did not alter in fixed effects analysis, neither trial was at low summary risk of bias or low risk from compliance problems. No included studies reported pre-diabetes outcomes.

### **Effect of omega-6 on glycated haemoglobin**

Omega-6 fats may have little or no effect on HbA1c (low-quality evidence, downgraded once each for risk of bias and imprecision). The suggestion of little or no effect (MD 0.00%, 95% CI -1.01 to 1.01,  $I^2$  0%, 64 participants in 2 RCTs, mean baseline HbA1c was 7.9%) was not altered in fixed effects meta-analysis, or when limited to trials with low risk from compliance bias, but no trials were at low summary risk of bias. We are aware of one further study that collected HbA1c data but did not report it <sup>16</sup>, and one where data were too unbalanced at baseline to use. <sup>17</sup>

### **Effect of omega-6 on HOMA-IR**

The effect of increasing omega-6 on HOMA-IR is unclear as the evidence is of very low-quality (downgraded for once for risk of bias and twice for indirectness). A single small trial of 6 months duration suggested higher HOMA-IR with higher omega-6 (MD 1.50, 95% CI 0.59 to 2.41, 60 participants, mean baseline HOMA-IR was 2.4), and must be considered very cautiously. A further small trial provided data not used due to baseline differences.<sup>18</sup>

### **Effect of omega-6 on fasting serum insulin**

Effects on fasting insulin are unclear as data are very low-quality (downgraded once each for risk of bias, inconsistency and imprecision). The meta-analysis of data from 124 participants in three trials was highly heterogeneous with wide confidence intervals (MD 14.71 pmol/L, 95% CI -19.81 to 49.24,  $I^2$  77%, mean baseline insulin was 55.4 pmol/L). Fixed effects analysis did not alter effects, limiting to the study with low compliance risk suggested no effect, and there were no trials at low summary risk of bias. One study<sup>19</sup> was too different at baseline to use in meta-analysis.

### **Effect of omega-6 on fasting glucose**

The effect of omega-6 fats on plasma glucose is unclear as the quality of evidence is very low (downgraded once each for risk of bias, publication bias and imprecision). Three RCTs, each of 6 months duration, reported fasting serum glucose. None were at low summary risk of bias (MD -0.09mmol/L, 95% CI -0.39 to 0.20,  $I^2$  0%, 134 participants, mean baseline glucose was 7.1 mmol/L). Lack of effect did not alter in fixed effects meta-analysis, but the single trial at low risk from compliance suggested a small reduction in glucose. We are aware of four further trials that assessed serum glucose but did not report it or reported arms with very different baseline glucose levels.

### **Effects of total PUFA**

When assessing effects of polyunsaturated fats on diabetes diagnosis we included eight studies<sup>18-25</sup> of  $\geq 6$  months duration that stated an aim to increase total PUFA or to increase both omega-3 and omega-6 fats. Most were also omega-6 trials (comparing omega-6 with something other than omega-3), except PREDIMED and Moore<sup>24-26</sup>. As none were at low summary risk of bias, all outcomes were downgraded for risk of bias. With only eight trials, we did not carry out additional sensitivity analyses, subgrouping or funnel plots. Table 3 shows GRADE summary of findings,

forest plots are shown in Figures 1 to 5, full details of PUFA analyses of primary outcomes, including sensitivity analyses are in Additional Tables 21 to 26.

### **Effect of total PUFA on diagnosis of diabetes or pre-diabetes**

The effect of increasing total PUFA on risk of diabetes diagnosis is unclear as the evidence was of very low-quality (downgraded once for risk of bias and twice for imprecision). Three eligible RCTs provided data suggesting potential harm (RR 1.08, 95% CI 0.81 to 1.43,  $I^2$  0%, 175 diagnoses in 4481 participants). The effect size was unaltered with fixed effects analysis (RR 1.08, 95% CI 0.81 to 1.44), and no studies were at low summary risk of bias or low risk of compliance bias.

We found no RCTs that assessed the effect of total PUFA on measures of pre-diabetes.

### **Effect of total PUFA on glycated haemoglobin**

Increasing total PUFA may make little or no difference to HbA1c (low-quality evidence, downgraded once each for risk of bias and imprecision). There was little or no effect of PUFAs on HbA1c (MD 0.08%, 95% CI -0.41 to 0.56,  $I^2$  0%, in 172 participants, 3 trials, mean baseline HbA1c was 8.6%). This did not alter in fixed-effects analysis or when limiting to trials at low risk of compliance bias.

### **Effect of total PUFA on HOMA-IR**

The effect of increasing total PUFA on HOMA-IR is unclear as the evidence is of very low-quality (downgraded for risk of bias, indirectness and imprecision). A subgroup of one trial, not at low summary risk of bias or risk from compliance, suggested a small decrease in HOMA-IR (MD -0.34, 95%CI -0.88 to 0.20, 93 participants, mean baseline HOMA-IR was 1.8). A further trial<sup>18</sup> provided unusable data.

### **Effect of total PUFA on fasting serum insulin**

Increasing total PUFA may make little or no difference to fasting insulin (low-quality evidence, downgraded for risk of bias and imprecision), (MD -0.60pmol/L, 95% CI -10.33 to 9.14,  $I^2$  0%, 157 participants, 3 trials, mean baseline insulin was 62 pmol/L). This was unchanged using fixed

effects meta-analysis or in the single trial at low risk from compliance. Two studies provided unusable data.<sup>19 24</sup>

### **Effect of total PUFA on fasting glucose**

Increasing total PUFA may have little or no effect on fasting glucose (low-quality data, downgraded for risk of bias and imprecision (MD -0.04mmol/L, 95% CI -0.18 to 0.11, I<sup>2</sup> 0%, 182 participants, 3 trials, mean baseline fasting glucose was 8.1 mmol/L). There was little or no effect in fixed effects analysis, the suggestion of a small reduction in glucose in the single study at low risk from compliance. Two further studies<sup>19 18</sup> provided unusable data due to large differences between arms at baseline, and one did not report numerical data.<sup>24</sup>

### **Secondary outcomes**

Secondary outcomes were planned as serum lipids, adiposity, all-cause mortality and diabetic mortality but are only reported in Additional Tables 13, 14, 20 & 26 as effects of omega-3, omega-6 and total PUFA on mortality, lipids and adiposity have been formally systematically reviewed in sister reviews assessing effects in RCTs of at least 12 months duration.<sup>27-29</sup>



## Tables

### Supplementary Table A. Table of characteristics and risk of bias assessments for each of the included studies

#### AlphaOmega - ALA 2011 <sup>30-32</sup>

|                      |                                                                                                                                                                                                                                                                                                                                                                                                                                                                                                                                                                                                                                                                                                 |
|----------------------|-------------------------------------------------------------------------------------------------------------------------------------------------------------------------------------------------------------------------------------------------------------------------------------------------------------------------------------------------------------------------------------------------------------------------------------------------------------------------------------------------------------------------------------------------------------------------------------------------------------------------------------------------------------------------------------------------|
| <b>Methods</b>       | RCT, (n3 ALA vs MUFA), 40 months<br>Summary risk of bias: Low                                                                                                                                                                                                                                                                                                                                                                                                                                                                                                                                                                                                                                   |
| <b>Participants</b>  | 60-80 year olds with previous MI<br>N: 1197 ALA int., 1236 control (1212 ALA + EPA/DHA intervention group)<br>Level of risk for CVD: High.<br>Male: 77.9% int., 78.7% control<br>Mean age (SD): 69.0 (5.6) int., 68.9 (5.6) control.<br>Age range: 60-80 years<br>Smokers: 17.4% int., 18% control.<br>Hypertension: Unclear<br>Medications taken by at least 50% of those in the control group: lipid lowering medication, antihypertensives, antithrombotics.<br>Medications taken by 20-49% of those in the control group: NR<br>Medications taken by some, but less than 20% of the control group: antiarrhythmic drugs, antidiabetic drugs.<br>Location: The Netherlands<br>Ethnicity: NR  |
| <b>Interventions</b> | Type: Supplementary margarine<br>Comparison: ALA vs MUFA<br>Intervention 20g of enriched margarine per day incorporating: 2g ALA. 8x250g margarine tubs delivered every 12 weeks: ALA 2g/d<br>Control: 20g of margarine per day. No additional n-3 PUFAs. Identical margarine (oleic acid) placebo.<br>Compliance: Unused margarine tubs were returned- daily intakes of margarine and n-3 fatty acids were calculated on the basis of the amount unused. Adherence was measured by levels of fatty acids in plasma cholesteryl esters, margarine and questionnaires. 90.5% of patients adhered to the protocol and consumed 20.6 (2.8) g of margarine/d.<br>Length of intervention: 40 months. |
| <b>Outcomes</b>      | Main study outcome: Cardiovascular disease events.<br>Dropouts: 91 died, 98 discontinued int., 93 died, 93 discontinued control.<br>Available outcomes: deaths, MI, cardiovascular events, ventricular arrhythmia, Incident cardiovascular disease, authors provided information on diabetes diagnosis<br>Response to contact: Yes                                                                                                                                                                                                                                                                                                                                                              |
| <b>Notes</b>         | The study has three intervention arms (ALA margarine, EPA/DHA margarine, mixture of the two interventions). This table represents the ALA only intervention. Outcome data is used for the ALA group where reported separately or for the combined (ALA arm, ALA + EPA/DHA arm)<br>Study funding: Netherlands Heart Foundation, National Institutes of Health and Unilever R&D (latter provided unrestricted grant for distribution of trial margarines).                                                                                                                                                                                                                                        |

#### Risk of bias table

| Bias                                                      | Authors' judgement | Support for judgement                                                                                                                                                                             |
|-----------------------------------------------------------|--------------------|---------------------------------------------------------------------------------------------------------------------------------------------------------------------------------------------------|
| Random sequence generation (selection bias)               | Low risk           | On the computer by a random number generator before the start of the trial.                                                                                                                       |
| Allocation concealment (selection bias)                   | Low risk           | Author confirmed allocation was concealed from clinicians/ researchers.                                                                                                                           |
| Blinding of participants and personnel (performance bias) | Low risk           | The 4 types of margarine were "similar in taste, texture and colour". A trained test panel did not perceive a fishy taste or odour. Randomisation tables were stored in safely under supervision. |
| Blinding of outcome assessment (detection bias)           | Low risk           | Randomisation tables were stored in safely under supervision. There was an independent statistician for data analysis. "Events were coded by three members                                        |

of the end-point adjudication committee who were unaware of the identity of the patient, the identity of the treating physician and the patients assigned study group".

|                                          |                                        |                                                                                                                                                                                                                                                                                                                                       |
|------------------------------------------|----------------------------------------|---------------------------------------------------------------------------------------------------------------------------------------------------------------------------------------------------------------------------------------------------------------------------------------------------------------------------------------|
| Incomplete outcome data (attrition bias) | <input type="text" value="Low risk"/>  | All patients were followed up for events computerised linkage with municipal registries. 2531 patients were only followed up for baseline anthropometric and medical measurements.                                                                                                                                                    |
| Selective reporting (reporting bias)     | <input type="text" value="High risk"/> | Sudden cardiac death endpoint omitted. Registered in August 2005, recruitment was from 2002 to 2006. Outcomes papers published in 2010.                                                                                                                                                                                               |
| Attention                                | <input type="text" value="Low risk"/>  | All participants appear to have had similar frequency and quantity of attention and follow up                                                                                                                                                                                                                                         |
| Compliance                               | <input type="text" value="Low risk"/>  | Unused margarine tubs were returned- daily intakes of margarine and n-3 fatty acids were calculated on the basis of the amount unused. Adherence was measured by levels of fatty acids in plasma cholesteryl esters, margarine and questionnaires. 90.5% of patients adhered to the protocol and consumed 20.6 (2.8) g of margarine/d |
| Other bias                               | <input type="text" value="Low risk"/>  | None noted                                                                                                                                                                                                                                                                                                                            |

### AlphaOmega - EPA+DHA <sup>30-32</sup>

**Methods** RCT, (n3 EPA + DHA vs MUFA), 40 months  
Summary risk of bias: Low

**Participants** 60-80 year olds with previous MI.  
N: 1192 EPA/DHA int., 1236 control (1212 ALA + EPA/DHA intervention group)  
Level of risk for CVD: High  
Male: 78.1% int., 78.7% control.  
Mean age (SD): 69.1 (5.6) int., 68.9 (5.6) control  
Age range: 60-80 years  
Smokers: 16.8%, int., 18% control.  
Hypertension: Unclear  
Medications taken by at least 50% of those in the control group: lipid lowering medication, antihypertensives, antithrombotics.  
Medications taken by 20-49% of those in the control group: NR  
Medications taken by some, but less than 20% of the control group: antiarrhythmic drugs, antidiabetic drugs.  
Location: The Netherlands  
Ethnicity: NR

**Interventions** Type: Supplementary Margarine  
Comparison 1: EPA & DHA vs MUFA  
Intervention 20g of enriched margarine per day incorporating 400mg EPA-DHA (240mg/d EPA and 160mg/d DHA): EPA+DHA 0.4g/d  
Control: 20g of margarine per day. No additional n-3 PUFAs. Identical margarine (oleic acid) placebo.  
Compliance: Unused margarine tubs were returned- daily intakes of margarine and n-3 fatty acids were calculated on the basis of the amount unused. Adherence was measured by levels of fatty acids in plasma cholesteryl esters, margarine and questionnaires. 90.5% of patients adhered to the protocol.  
Length of intervention: 40 months.

**Outcomes** Main study outcome: Cardiovascular disease events.  
Dropouts: 95 died, 119 discontinued int., 93 died, 93 discontinued control.  
Available outcomes: deaths, MI, cardiovascular events, ventricular arrhythmia, Incident cardiovascular disease, authors provided information on diabetes diagnosis  
Response to contact: Yes

**Notes** The study has three intervention arms (ALA margarine, EPA/DHA margarine, mixture of the two interventions). This table represents the EPA/DHA only intervention. Outcome data is used for the EPA/DHA group where available or for the combined (EPA/DHA arm, EPA/DHA & ALA arm)  
Study funding: Netherlands Heart Foundation, National Institutes of Health and Unilever R&D (latter provided unrestricted grant for distribution of trial margarines).

#### Risk of bias table

| Bias                                                      | Authors' judgement | Support for judgement                                                                                                                                                                                                                                                                                                                 |
|-----------------------------------------------------------|--------------------|---------------------------------------------------------------------------------------------------------------------------------------------------------------------------------------------------------------------------------------------------------------------------------------------------------------------------------------|
| Random sequence generation (selection bias)               | Low risk           | On the computer by a random number generator before the start of the trial.                                                                                                                                                                                                                                                           |
| Allocation concealment (selection bias)                   | Low risk           | Author confirmed allocation was concealed from clinicians/ researchers.                                                                                                                                                                                                                                                               |
| Blinding of participants and personnel (performance bias) | Low risk           | The 4 types of margarine were "similar in taste, texture and colour". A trained test panel did not perceive a fishy taste or odour. Randomisation tables were stored in safely under supervision.                                                                                                                                     |
| Blinding of outcome assessment (detection bias)           | Low risk           | Randomisation tables were stored in safely under supervision. There was an independent statistician for data analysis. "Events were coded by three members of the end-point adjudication committee who were unaware of the identity of the patient, the identity of the treating physician and the patients assigned study group".    |
| Incomplete outcome data (attrition bias)                  | Low risk           | All patients were followed up for events computerised linkage with municipal registries. 2531 patients were only followed up for baseline anthropometric and medical measurements.                                                                                                                                                    |
| Selective reporting (reporting bias)                      | High risk          | Sudden cardiac death endpoint omitted. Registered from August 2005, recruitment was from 2002 to 2006. Outcomes papers published in 2010.                                                                                                                                                                                             |
| Attention                                                 | Low risk           | All participants appear to have had similar frequency and quantity of attention and follow up                                                                                                                                                                                                                                         |
| Compliance                                                | Low risk           | Unused margarine tubs were returned- daily intakes of margarine and n-3 fatty acids were calculated on the basis of the amount unused. Adherence was measured by levels of fatty acids in plasma cholesteryl esters, margarine and questionnaires. 90.5% of patients adhered to the protocol and consumed 20.6 (2.8) g of margarine/d |
| Other bias                                                | Low risk           | None noted                                                                                                                                                                                                                                                                                                                            |

## AREDS2 2014<sup>3 33</sup>

**Methods** Age-Related Eye Disease Study 2 (AREDS2)  
 RCT, parallel, 2x2 factorial (n3 EPA+DHA vs nil) also randomised to lutein and zeaxanthin vs nil, 5 years  
 Summary risk of bias: Low

**Participants** People aged 50-85 at high risk of progression to advanced age-related macular degeneration (AMD).  
 N: 2147 Int (1068 DHA/EPA, 1079 DHA/EPA + Lutein/Zeaxanthin), 2056 control (1012 placebo, 1044 Lutein/Zeaxan)  
 Level of risk for CVD: Low (however ~20% had previous CV event)  
 Male: Int 42.1%, Cont 44.4%  
 Age: Int median 74.6 (IQR 11.1), Cont median 74 (IQR 11.1) years  
 Age range: 68-79 years  
 Smokers: Int 6.3%, Cont 7.2%  
 Hypertension: Unclear  
 Medications taken by at least 50% of those in the control group: Multivitamins  
 Medications taken by 20-49% of those in the control group: Cholesterol lowering drugs, aspirin  
 Medications taken by some, but less than 20% of the control group: NSAID, paracetamol  
 Location: USA  
 Ethnicity: White 96.5% int., 96.6% cont., Hispanic 2.6 int., 1.3 cont.

**Interventions** Type: supplement (capsule)  
 Comparison: EPA & DHA vs nil  
 Intervention 350 mg/d DHA plus 650 mg/d EPA added to the standard AREDS supplement of Vitamin C (500mg/d), Vitamin E (440IU/d), beta-carotene (15mg/d), zinc oxide (80mg/d) and cupric oxide (2mg/d): EPA+DHA 1.0g/d  
 Control: standard AREDS supp of Vitamin C (500mg/d), Vitamin E (400IU/d), beta-carotene (15mg/d), zinc oxide (80mg/d) & cupric oxide (2mg/d).

Compliance: Assessed by pill count - 84% of participants in each group took at least 75% of study medications

Length of intervention: 60 months.

- Outcomes** Main study outcome: Development of advanced AMD  
 Dropouts: Int 200 died, 165 discontinued, 80 were lost to follow up.  
 Cont 168 died, 140 discontinued, 61 were lost to follow up.  
 Available outcomes: deaths, cardiovascular death, MI, stroke, angina, heart failure, revascularization, cognition, eye health, (authors provided data on diabetes diagnosis, depression diagnosis, breast cancer)  
 Response to contact: Yes
- Notes** Study funding: National Eye Institute/National Institutes of Health, Department of Health and Human Services.

### Risk of bias table

| Bias                                                      | Authors' judgement | Support for judgement                                                                                                                                                                                                                                                                                                                                                                         |
|-----------------------------------------------------------|--------------------|-----------------------------------------------------------------------------------------------------------------------------------------------------------------------------------------------------------------------------------------------------------------------------------------------------------------------------------------------------------------------------------------------|
| Random sequence generation (selection bias)               | Low risk           | "random block design was implemented using the AREDS2 Advantage Electronic Data Capture system by the AREDS2 Coordinating Center"                                                                                                                                                                                                                                                             |
| Allocation concealment (selection bias)                   | Low risk           | Each treatment was assigned 5 bottle numbers. Bottle numbers were issued via an electronic randomisation system for each participant once study eligibility was verified. The assigned bottle number was used to distribute the study treatment(s). AREDS2 Coordinating centre personnel involved in creating the randomisation system had access to the bottle number/treatment assignments. |
| Blinding of participants and personnel (performance bias) | Low risk           | "Participants, investigators, study coordinators, and all other study personnel are masked to treatment assignment".                                                                                                                                                                                                                                                                          |
| Blinding of outcome assessment (detection bias)           |                    | The coordinating centre randomly assigned the event to a study adjudicator, who made the final determination of these study end points through review of the medical records and applying the end point criterion defined a priori. All adjudicators were masked to study assignment.                                                                                                         |
| Incomplete outcome data (attrition bias)                  | Low risk           | <20% attrition over 5 years, balanced reasons for drop outs.                                                                                                                                                                                                                                                                                                                                  |
| Selective reporting (reporting bias)                      | Low risk           | Outcomes in Trials Registry entry appear to all be reported (NCT00345176). Entry received June 2006, recruitment Sep 2006 – Oct 2012.                                                                                                                                                                                                                                                         |
| Attention                                                 | Low risk           | Participants, investigators, study coordinators, and all other study personnel are masked to treatment assignment, so attention bias not feasible                                                                                                                                                                                                                                             |
| Compliance                                                | Unclear risk       | Assessed by pill count - 84% of participants in each group took at least 75% of study medications                                                                                                                                                                                                                                                                                             |
| Other bias                                                | Low risk           | None noted                                                                                                                                                                                                                                                                                                                                                                                    |

## ASCEND 2018 <sup>11 34</sup>

**Methods** A Study of Cardiovascular Events in Diabetes (ASCEND)  
 RCT, parallel, 2 x 2 factorial (n-3 EPA + DHA vs MUFA) also randomised to aspirin vs placebo), median 7.4 years  
 Summary risk of bias: low

**Participants** Patients with diabetes, without apparent vascular disease  
 N: 7740 intervention, 7740 control (ITT so 7740 in each arm analysed)  
 Level of risk for CVD: moderate (DM)  
 Men: intervention 62.6%, control 62.6%  
 Age in years (SD): intervention 63.3 (9.2), control 63.3 (9.2)  
 Age range: 40+ years

Smokers: intervention 8.3%, control 8.3%  
 Hypertension: intervention 61.6%, control 61.6%  
 Medications taken by at least 50% of those in the control group: statins, metformin, ACE inhibitors or ARBs  
 Medications taken by 20%-49% of those in the control group: aspirin, insulin, sulphonylurea, calcium channel blockers  
 Medications taken by some, but less than 20% of the control group: NSAID, thiazolidinedione, beta-blockers, thiazide or related diuretics, PPI  
 Location: UK  
 Ethnicity: white 96.5% intervention, 96.5% control

**Interventions** Type: supplement (capsule)  
 Comparison: EPA + DHA vs MUFA  
 Intervention: 840mg/d EPA+DHA (460mg/d EPA plus 380mg/d DHA) as 1 capsule daily, provided by Mylan, Solvay and Abbott.  
 Arm 1: omega-3 (1 g/d: 0.41 g EPA, 0.34 g DHA) and placebo tablets for aspirin  
 Arm 3: omega-3 (1 g/d) and aspirin (100 mg/d)  
 Control: 1 capsule/d of olive oil provided by Mylan, Solvay and Abbott.  
 Arm 2: aspirin (100 mg/d) and olive oil placebo capsule  
 Arm 4: olive oil placebo and placebo tablets for aspirin  
 Compliance: assessed through posted questionnaires, suggesting 77% compliance in intervention group, 76% in control. 10% also took over-the-counter fish oil.  
 Length of intervention: mean 7.4 years

**Outcomes** Main study outcome: serious vascular events (first of MI, stroke, TIA or vascular death)  
 Dropouts: intervention 2879 stopped taking meds for some reason, but were included in analysis; control 2938 stopped taking meds, but were included in analysis  
 Available outcomes: deaths, cardiovascular death, MI, stroke, heart failure, revascularisation, atrial fibrillation, diabetes complications, cancer diagnosis, breast cancer, prostate cancer (and other types of cancer), TIA, IBD, dementia, depressive disorders, anxiety, suicidal and injurious behaviour, Parkinsons' disease, body weight, serum cholesterol, HDL cholesterol, HbA1c  
 Response to contact: not yet attempted

**Notes** NCT00135226  
 Trial website: [ascend.medsci.ox.ac.uk](http://ascend.medsci.ox.ac.uk); [rum.ctsu.ox.ac.uk/ascend](http://rum.ctsu.ox.ac.uk/ascend)  
 Study funding: British Heart Foundation, medications provided by Mylan, Solvay and Abbott.

### Risk of bias table

| Bias                                                      | Authors' judgement | Support for judgement                                                                                                                                                                 |
|-----------------------------------------------------------|--------------------|---------------------------------------------------------------------------------------------------------------------------------------------------------------------------------------|
| Random sequence generation (selection bias)               | Low risk           | Randomised using minimisation                                                                                                                                                         |
| Allocation concealment (selection bias)                   | Low risk           | Almost no direct contact with trial personnel - all via questionnaires and GP appointments, central randomisation appears to follow consent                                           |
| Blinding of participants and personnel (performance bias) | Low risk           | Blinding of participants, care providers, investigators and outcome assessors stated in trials register. This appears feasible given the dispersed design with mainly postal contact. |
| Blinding of outcome assessment (detection bias)           | Low risk           | Outcomes self-reported (questionnaire) but investigated by masked adjudication committee                                                                                              |
| Incomplete outcome data (attrition bias)                  | Low risk           | Intention to treat analysis                                                                                                                                                           |
| Selective reporting (reporting bias)                      | Low risk           | Prospective trial registration (registered Aug 2005, recruitment June 2005 to July 2011), and all outcomes in register reported (plus extensive adverse event list)                   |
| Attention                                                 | Low risk           | Almost no contact that could differ between groups                                                                                                                                    |
| Compliance                                                | Unclear risk       | All information was via questionnaires, so unclear.                                                                                                                                   |
| Other bias                                                | Low risk           | None noted.                                                                                                                                                                           |

## Balfego 2016<sup>13</sup>

**Methods** RCT, parallel, (LCn3 vs lower LCn3), 6 months

Summary risk of bias: Moderate or high

- Participants** Drug-naive patients with type 2 diabetes  
N: 19 int., 16 control. (analysed, int: 17 cont: 15)  
Level of risk for CVD: Moderate  
Male: 42.1% int., 50.0% control.  
Mean age (SD): 60 (7.41) int., 61.2 (9.6) control  
Age range: Inclusion 40-70 years  
Smokers: NR  
Hypertension: NR  
Medications taken by at least 50% of those in the control group: NR  
Medications taken by 20-49% of those in the control group: NR  
Medications taken by some, but less than 20% of the control group: Statins, beta blockers  
Location: Spain  
Ethnicity: NR
- Interventions** Type: supplemented food (sardine-enriched diet or control diet)  
Comparison: n3 vs lower n3  
Intervention: Standard diet for type 2 diabetes enriched with sardines plus dietary advice  
Control: Standard diet for type 2 diabetes plus dietary advice  
Compliance: Erythrocyte omega-3 index; and 3-d food record and food frequency questionnaire  
Duration of intervention: 6 months
- Outcomes** Main study outcome: Metabolic control, inflammation and gut microbiota  
Dropouts: 2 int., 1 control  
Available outcomes: Weight, BMI, glucose, insulin, HOMA, HbA1c, inflammatory markers (weight and BMI not used due to baseline differences)  
Response to contact: No contact attempted
- Notes** Study funding: Catalunya-La Pedrera Foundation, Government of Catalonia

#### Risk of bias table

| Bias                                                      | Authors' judgement | Support for judgement                                                                                     |
|-----------------------------------------------------------|--------------------|-----------------------------------------------------------------------------------------------------------|
| Random sequence generation (selection bias)               | Low risk           | Randomised using online software                                                                          |
| Allocation concealment (selection bias)                   | Unclear risk       | An external person was involved in allocating                                                             |
| Blinding of participants and personnel (performance bias) | High risk          | Sardine vs control diet                                                                                   |
| Blinding of outcome assessment (detection bias)           | Unclear risk       | NR                                                                                                        |
| Incomplete outcome data (attrition bias)                  | Low risk           | Balanced drop outs and <10% in 6 months                                                                   |
| Selective reporting (reporting bias)                      | Unclear risk       | Retrospectively registered                                                                                |
| Attention                                                 | Unclear risk       | Not specified and diets differ (sardines or control diet)                                                 |
| Compliance                                                | Low risk           | Significant increase in EPA and DHA erythrocyte fatty acids in the intervention group at intervention end |
| Other bias                                                | Low risk           | None noted                                                                                                |

#### Baxheinrich 2012 <sup>35</sup>

- Methods** RCT, parallel, (n3 ALA vs MUFA), 6 months  
Summary risk of bias: Moderate or high
- Participants** Participants with metabolic syndrome  
N: 47 int., 48 control. (analysed, int: 40 cont: 41)  
Level of risk for CVD: Moderate  
Male: 32.10% in both groups combined  
Mean age (SD): 52.3 (10.6) int., 50.3 (9.8) control  
Age range: NR  
Smokers: NR  
Hypertension: NR  
Medications taken by at least 50% of those in the control group: NR  
Medications taken by 20-49% of those in the control group: NR  
Medications taken by some, but less than 20% of the control group: NR

Location: Germany  
 Ethnicity: NR

**Interventions** Type: supplementary food (advice to consume hypo-energetic diet with rapeseed oil or olive oil)  
 Comparison: ALA vs MUFA  
 Intervention: Rapeseed oil (Brokelmann) and a rapeseed-based margarine (Othuna): ALA 3.5g/d  
 Control: Olive oil (including <1g/d ALA, Lamotte Oils)  
**PUFA Dose:** (intended) increase 3.5g/d ALA, **1.6%E n-3, 1.6%E PUFA**  
 Compliance: Dietary record  
 Duration of intervention: 6 months

**Outcomes** Main study outcome: Body weight and cardiovascular risk profile  
 Dropouts: 6 int., 7 control  
 Available outcomes: Adiposity, lipids, glucose, insulin (BP and metabolic syndrome- 6 months only)  
 Response to contact: No contact attempted

**Notes** Study funding: Union for Promoting Oil and Protein Plants and the International Foundation for the Promotion of Nutrition Research and Nutrition Education

**Risk of bias table**

| Bias                                                      | Authors' judgement | Support for judgement                                                                              |
|-----------------------------------------------------------|--------------------|----------------------------------------------------------------------------------------------------|
| Random sequence generation (selection bias)               | Unclear risk       | "randomly assigned"                                                                                |
| Allocation concealment (selection bias)                   | Unclear risk       | As above                                                                                           |
| Blinding of participants and personnel (performance bias) | High risk          | Appears open- control participants consumed a different oil once weekly                            |
| Blinding of outcome assessment (detection bias)           | Unclear risk       | NR                                                                                                 |
| Incomplete outcome data (attrition bias)                  | Low risk           | Analysis for completers only. Similar drop-out and reasons by arm                                  |
| Selective reporting (reporting bias)                      | Unclear risk       | No registry or protocol identified                                                                 |
| Attention                                                 | Low risk           | Counselling about lifestyle, dietary behaviour and physical activity was identical for both groups |
| Compliance                                                | Low risk           | Significant difference in dietary intake for ALA recorded at 6 months                              |
| Other bias                                                | Low risk           | None identified                                                                                    |

**Bonnema 1995** <sup>36</sup>

**Methods** RCT, parallel, (n3 EPA+DHA vs MUFA), 6 months  
 Summary risk of bias: Moderate or high

**Participants** Adults with insulin-treated diabetes and microalbuminuria  
 N: 14 int., 14 control. (analysed, int: 14 cont: 13)  
 Level of risk for CVD: moderate (diabetes)  
 Male: 57% int., 50% control.  
 Mean age (SD) years: 47 (16) int., 41 (12) control  
 Age range: NR  
 Smokers: 71% int., 57% control  
 Hypertension: 0% int., 0% control  
 Medications taken by at least 50% of those in the control group: insulin  
 Medications taken by 20-49% of those in the control group: NR  
 Medications taken by some, but less than 20% of the control group: NR  
 (Diuretics allowed, and vasoactive and lipid lowering drugs prohibited)  
 Location: Denmark  
 Ethnicity: NR

**Interventions** Type: supplement  
 Comparison: fish oil capsules vs olive oil capsules  
 Intervention: 6x1g fish oil capsules (Pikasol) daily (with conventional diabetic diet) including 2g/d EPA plus 1.32g/d DHA: EPA+DHA 3.32g/d  
 Control: 6x1g olive oil capsules daily (with conventional diabetic diet)  
**PUFA Dose:** (intended) increase 3.32g/d EPA+DHA, **1.5%E n-3, 1.5%E PUFA**  
 Compliance: Capsule count, average daily consumption was >95% expected amount

Duration of intervention: 6 months

- Outcomes** Main study outcome: peripheral arterial compliance  
 Dropouts: 0 int., 1 control  
 Available outcomes: glucose, HbA1c, total & HDL cholesterol (BP, urinary albumin, serum creatinine, arterial & venous compliance - these not used, TG not used as 2 arms very different at baseline), no deaths or CVD events occurred, insulin doses not altered. 2 in intervention group, 0 in control developed albumin excretion.  
 Response to contact: yes
- Notes** Study funding: Esbjerg Fonden, Fonden for laegevidenskabelig forskning i Rignkoebing, Ribe and Soenderjyllands Amter, capsules from Lube Ltd, Denmark.

**Risk of bias table**

| Bias                                                      | Authors' judgement | Support for judgement                                                                                                                                                                        |
|-----------------------------------------------------------|--------------------|----------------------------------------------------------------------------------------------------------------------------------------------------------------------------------------------|
| Random sequence generation (selection bias)               | Low risk           | "Randomization was done by sealed envelopes", and was "blinded through a third person without involvement of the investigators"                                                              |
| Allocation concealment (selection bias)                   | Low risk           | As above.                                                                                                                                                                                    |
| Blinding of participants and personnel (performance bias) | Unclear risk       | Authors replied to reviewers stating that the recipients and providers were unaware of the assigned treatment, but it is unclear how this was achieved given that fish oil is easy to taste. |
| Blinding of outcome assessment (detection bias)           | Unclear risk       | Unclear.                                                                                                                                                                                     |
| Incomplete outcome data (attrition bias)                  | Low risk           | One withdrawal only of 28 randomised, due to adverse effects                                                                                                                                 |
| Selective reporting (reporting bias)                      | Unclear risk       | No trials registry entry or study protocol identified.                                                                                                                                       |
| Attention                                                 | Unclear risk       | Participants all visited every 2 months, no suggestion of differential treatment                                                                                                             |
| Compliance                                                | Low risk           | Pill counts suggested high compliance.                                                                                                                                                       |
| Other bias                                                | Low risk           | None noted                                                                                                                                                                                   |

**Burr 2003 - DART2** <sup>37</sup>

**Methods** DART2  
 RCT, 2x2, (n3 EPA+DHA vs nil, also fruit, veg & oats vs no specific advice), 3-9 years  
 Summary risk of bias: Moderate or high

**Participants** Men treated for angina  
 N: 1571 int., 1543 cont (all analysed for events)  
 Control Level of risk for CVD: High  
 Male: 100%  
 Mean age (SD): 61.1 (NR) int., 61.1 (NR) control  
 Age range: Unclear  
 Smokers: 25% int., 23% control  
 Hypertension: 49% int., 47% control  
 Medications taken by at least 50% of those in the control group: NR  
 Medications taken by 20-49% : lipid lowering, beta-blockers  
 Medications taken by some, but less than 20% of the control group: NR  
 Location: UK  
 Ethnicity: NR

**Interventions** Type: dietary advice (to eat more oily fish or take fish oil capsules)  
 Comparison: EPA & DHA vs nil  
 Intervention: Most (1109) advised to eat at least 2 weekly portions of fatty fish OR take MaxEPA capsules, 3/d (0.5g EPA/d). But 462 participants were sub-randomised to receive only fish oil capsules, not dietary fish advice: EPA 0.5g/d  
 Control: None specific sensible eating advice that did not include either of the interventions.  
 Compliance: Postal dietary questionnaire suggested dietary EPA intake increased by 2.4g /week int., 0.2g /week control  
 Duration of intervention: 36 to 108 months



**Outcomes** Main study outcome: total mortality  
 Dropouts: none for mortality  
 Available outcomes: total and CV deaths, sudden death, stroke, heart failure, cancer deaths, diagnosis type 2 diabetes.  
 Response to contact: Yes

**Notes** Some of each group were also advised on high fruit, veg and oat diets, and those who received neither fish nor fruit advice received 'non-specific' dietary advice. All those whose BMI >30 in both groups received weight reduction advice.  
 Study funding: Probably British Heart Foundation, Seven Seas Ltd, Novex Pharma Ltd and the Fish Foundation (these were acknowledged)

### Risk of bias table

| Bias                                                      | Authors' judgement | Support for judgement                                                                                     |
|-----------------------------------------------------------|--------------------|-----------------------------------------------------------------------------------------------------------|
| Random sequence generation (selection bias)               | Unclear risk       | "randomly allocated"                                                                                      |
| Allocation concealment (selection bias)                   | Unclear risk       | Pre-prepared sequentially numbered envelopes opened by dietitian (unclear if envelopes were opaque)       |
| Blinding of participants and personnel (performance bias) | High risk          | Dietary advice, so not possible for participants to be blinded to intervention                            |
| Blinding of outcome assessment (detection bias)           | Low risk           | Outcome assessors were not aware of study allocation (Prof Burr stated he did not know assignments)       |
| Incomplete outcome data (attrition bias)                  | Low risk           | Hospital notes and death registers were flagged to catch all outcome data                                 |
| Selective reporting (reporting bias)                      | Unclear risk       | No study protocol was found, or trials registry entry                                                     |
| Attention                                                 | High risk          | More attention was paid to those given dietary advice                                                     |
| Compliance                                                | Unclear risk       | Postal dietary questionnaire suggested dietary EPA intake increased by 2.4g/week int., 0.2g /week control |
| Other bias                                                | Low risk           | None noted                                                                                                |

### Caldwell 2011 <sup>4 12</sup>

**Methods** RCT, parallel, (n3 EPA+DHA or n6 LA), 12 months  
 Summary risk of bias: Low

**Participants** Participants with non-cirrhotic NASH (non-alcoholic steatohepatitis)  
 N: 20 int., 21 control (analysed 17 int., 17 control).  
 Level of risk for CVD: Moderate  
 Male: 35.3% int., 41.2% control.  
 Mean age (SD): 46.4 (12.1) int., 47.2 (12) control  
 Age range: 25-72  
 Smokers: NR  
 Hypertension: NR  
 Medications taken by at least 50% of those in the control group: NR  
 Medications taken by 20-49% of those in the control group: NR  
 Medications taken by some, but less than 20% of the control group: NR  
 Location: USA  
 Ethnicity: Int,100% Caucasian, Control 94.% Caucasian, 5.9% other.

**Interventions** Type: supplement (capsule)  
 Comparison: EPA+DHA vs omega 6  
 Intervention: 3x 1g fish oil capsules/d (Nordic Natural) for a total 2.1g/d n-3, each capsule contained 70% of n-3 (1050 mg EPA, 750 mg DHA & 300 mg other n-3): EPA+DHA 1.8g/d  
 Control: 3x 1g Identical placebo (soybean) capsules per day containing 8% fish oils.  
 Both groups had dietary counselling on caloric intake and physical activity  
 Compliance: unclear (measured n6-n3 ratio due to its link to hepatic lipid composition)  
 Length of intervention: 12 months

**Outcomes** Main study outcome: NASH activity score  
 Dropouts: 3 int., 3 control  
 Available outcomes: Lipids, measures of adiposity, insulin, HOMA-IR (glucose available but unbalanced at baseline)

Response to contact: yes

**Notes** Data on; BMI, weight, visceral fat, TG and glucose were not used as they were different between groups at baseline.  
 Study funding: study was supported by NIH NCCAM Grant 5R21AT2901–2 and 5 M01 RR00847.  
 Study medication and identical appearing placebo was provided at no charge by Nordic Natural. RBC phospholipid profile was performed by Metamatrix (www.metamatrix.com). M30, M65, adiponectin, and IGFBP-1 electro chemiluminescence assays were performed by Wellstat Diagnostics (www.wellstatdiagnostics.com).

### Risk of bias table

| Bias                                                      | Authors' judgement | Support for judgement                                                                                                                                                                                                                |
|-----------------------------------------------------------|--------------------|--------------------------------------------------------------------------------------------------------------------------------------------------------------------------------------------------------------------------------------|
| Random sequence generation (selection bias)               | Low risk           | Participants were randomized to N-3 or placebo using a stratified block 1:1 randomization scheme. An independent biostatistician generated the randomization list which was confidentially forwarded to the Investigational Pharmacy |
| Allocation concealment (selection bias)                   | Low risk           | As above                                                                                                                                                                                                                             |
| Blinding of participants and personnel (performance bias) | Low risk           | All staff and subjects were blinded to therapy assignment throughout the study period. Both capsules were identical.                                                                                                                 |
| Blinding of outcome assessment (detection bias)           | Low risk           | Participants blinded for main outcome (NASH activity score)                                                                                                                                                                          |
| Incomplete outcome data (attrition bias)                  | Low risk           | 15% drop outs explained and equal in both groups                                                                                                                                                                                     |
| Selective reporting (reporting bias)                      | Low risk           | The trial was prospectively registered                                                                                                                                                                                               |
| Attention                                                 | Low risk           | Both groups had the same attention                                                                                                                                                                                                   |
| Compliance                                                | Unclear risk       | No details on compliance measurement                                                                                                                                                                                                 |
| Other bias                                                | Low risk           | None noted                                                                                                                                                                                                                           |

### Clark 2016<sup>38</sup>

**Methods** RCT, parallel, (n3 EPA+DHA vs n6 LA), 9 months  
 Summary risk of bias: Moderate or high

**Participants** Adults with impaired glucose metabolism or type 2 diabetes mellitus  
 N: 36 randomised (not specified by arm) (analysed, int: 16 cont: 17)  
 Level of risk for CVD: Low  
 Male: 63% int., 59% control.  
 Mean age (SD): 61.8 (NR) int., 58.1 (NR) control  
 Age range: 52-67 int, 51-68 cont, years  
 Smokers: NR  
 Hypertension: NR  
 Medications taken by at least 50% of those in the control group: NR  
 Medications taken by 20-49% of those in the control group: NR  
 Medications taken by some, but less than 20% of the control group: NR  
 Non-steroidal anti-inflammatory medication and diabetic medications were not allowed, statins were allowed (but unclear how many used them)  
 Location: Scotland, UK  
 Ethnicity: NR

**Interventions** Type: supplement (capsule)  
 Comparison: fish oil vs maize oil  
 Intervention: 6g/d fish oil from menhaden & pacific herring as 6x1g EPAX 6000 TG (EPAX AS), 3.9g/d omega 3: EPA+DHA 3.9g/d  
 Control: 6g/d as 6x1g maize oil (<2% EPA+DHA)  
**PUFA Dose:** (intended) increase 3.9g/d EPA+DHA, **1.8%E n-3, 1.8%E PUFA**  
 Compliance: monthly capsule count plus phospholipid composition of erythrocyte membranes  
 Duration of intervention: 9 months

**Outcomes** Main study outcome: insulin sensitivity  
 Dropouts: NR (36 randomised, 16 int, 17 cont analysed)

Available outcomes: Diabetes diagnosis, weight, %body fat, lipids, fasting glucose & insulin , HOMA2-IR, , fasting endogenous glucose production, branched chain amino acids, C-peptide measured but not used)

Response to contact: Yes (data provided)

**Notes** Study funding: core grant from the Scottish Government to the Rowett Institute, EPAX AS provided the intervention and control capsules.  
Diabetes diagnosis: only data on confirmed diagnosis were used. Data provided by authors included participants with raised HbA1c not used.

### Risk of bias table

| Bias                                                      | Authors' judgement | Support for judgement                                                                                                                                                                                                                                                                                                                                  |
|-----------------------------------------------------------|--------------------|--------------------------------------------------------------------------------------------------------------------------------------------------------------------------------------------------------------------------------------------------------------------------------------------------------------------------------------------------------|
| Random sequence generation (selection bias)               | Low risk           | Author confirmed the Statistician (head of the local Biomathematics and Statistics (BioSS) team) generated a random list (computer generated) for oil distribution; the contents of this list were known only to him.                                                                                                                                  |
| Allocation concealment (selection bias)                   | Low risk           | As above                                                                                                                                                                                                                                                                                                                                               |
| Blinding of participants and personnel (performance bias) | Unclear risk       | "Capsules of the two oils were identical in outward appearance and were provided via the double-blind procedure in similar containers labelled sequentially under the supervision of an independent nutritionist. Neither volunteers nor researchers knew which treatment was allocated.". However no information provided on capsules taste or smell. |
| Blinding of outcome assessment (detection bias)           | Low risk           | Author confirmed: At the end of the trial and following data analysis, the final codes were disclosed by the Statistician.<br>So throughout the trial neither the volunteers nor the Experimenters knew which oil was allocated to whom                                                                                                                |
| Incomplete outcome data (attrition bias)                  | Low risk           | 3 dropouts only of 36 randomised (8%), reasons provided                                                                                                                                                                                                                                                                                                |
| Selective reporting (reporting bias)                      | Unclear risk       | All outcomes mentioned in the registry were presented, but study started in Feb 2009 and study was registered in Nov 2010, unclear how many participants had completed by this time                                                                                                                                                                    |
| Attention                                                 | Low risk           | Intervention and control participants appeared to have the same time and procedures at each appointment                                                                                                                                                                                                                                                |
| Compliance                                                | Low risk           | Erythrocyte membrane long chain omega 3 fatty acids were significantly different in intervention and control participants                                                                                                                                                                                                                              |
| Other bias                                                | Low risk           | None noted                                                                                                                                                                                                                                                                                                                                             |

### Connor 1993<sup>39 40</sup>

**Methods** RCT, cross-over, (n3 EPA+DHA vs MUFA), 6 months  
Summary risk of bias: Moderate or high

**Participants** Participants with non-insulin dependent diabetes and hypertriglyceridemia  
N: 16 int., 16 control. (analysed, int: 16 cont: 16)  
Level of risk for CVD: Moderate  
Male: NR  
Mean age (SD): 58.7 (7.8) in both groups combined  
Age range: 46-72 years overall  
Smokers: NR  
Hypertension: NR  
Medications taken by at least 50% of those in the control group: 15/16 pts were on oral hypoglycaemic agents  
Medications taken by 20-49% of those in the control group: insulin  
Medications taken by some, but less than 20% of the control group: NR  
Location: USA  
Ethnicity: NR

**Interventions** Type: supplement (fish oil or olive oil)  
 Comparison: EPA+DHA vs MUFA  
 Intervention: 15g fish oil/d (including 4.1g/d EPA and 1.9g/d DHA, Promegae, Parke David Warner Lambert): EPA+DHA 6.0g/d  
 Control: 15g olive oil/d (Parke David Warner Lambert)  
**PUFA Dose:** (intended) increase 6.0g/d EPA+DHA, **2.7%E n-3, 2.7%E PUFA**  
 Compliance: Plasma fatty acids  
 Duration of intervention: 2 consecutive 6 month periods of intervention or control

**Outcomes** Main study outcome: Lipids and diabetic control  
 Dropouts: 0 int., 0 control  
 Available outcomes: Lipids, glucose (plasma and urinary), HbA1c, weight, mortality  
 Response to contact: yes

**Notes** Author response confirming no mortality/ cardiovascular events  
 Study funding: Institutes of health, Oregon sea grant

**Risk of bias table**

| Bias                                                      | Authors' judgement | Support for judgement              |
|-----------------------------------------------------------|--------------------|------------------------------------|
| Random sequence generation (selection bias)               | Unclear risk       | "randomized" "coin"                |
| Allocation concealment (selection bias)                   | Unclear risk       | No details                         |
| Blinding of participants and personnel (performance bias) | Unclear risk       | No details                         |
| Blinding of outcome assessment (detection bias)           | Unclear risk       | No details                         |
| Incomplete outcome data (attrition bias)                  | Low risk           | No drop outs                       |
| Selective reporting (reporting bias)                      | Unclear risk       | No registry or protocol identified |
| Attention                                                 | Low risk           | Identical treatment is described   |
| Compliance                                                | Unclear risk       | No p-values supplied               |
| Other bias                                                | Low risk           | None noted                         |

**DART fat 1989** <sup>20 41 42</sup>

**Methods** Diet And Reinfarction Trial (DART)  
 RCT, n6 LA vs mixed fats, 2 years  
 Summary risk of bias: Moderate or high

**Participants** Men recovering from an MI  
 CVD risk: high  
 Control: randomised 1015, analysed unclear  
 Intervention: randomised 1018, analysed unclear  
 Mean years in trial: control 1.9, randomised 1.9  
 % male: 100%  
 Age: mean control 56.8, intervention 56.4  
 Age range: all <70 years  
 Smokers: control 62.7%, int 61.2%  
 Hypertension: cont 23.3%, int 24%  
 Medications taken by at least 50% of those in the control group: NR  
 Medications taken by 20-49% of those in the control group: beta-blockers, other anti-hypertensives, anti-anginals  
 Medications taken by some, but less than 20% of the control group: anti-coagulant, aspirin, other anti-platelet, digoxin, other cardiac drugs  
 Location: UK  
 Ethnicity: NR

**Interventions** Type: dietary advice  
 Comparison: ↑ polyunsaturated oil and margarines (n6) vs usual dietary fats  
 Intervention aims: reduce fat intake to 30%E, increase P/S to 1.0 (using polyunsaturated oils and margarines), weight reducing advice if BMI>30 (dietitians provided the participants and their wives with initial individual advice and a diet information sheet, participants were revisited for further advice,

recipes, encouragement at 1, 3, 6, 9, 12, 15, 18 and 21 months)  
 Control aims: no dietary advice on fat, weight reducing advice if BMI>30 (dietitians provided 'sensible eating' advice without specific information on fats)  
**Dose:** (intake data) int group 11%E SFA, P/S 0.85, PUFA 9.4%E. Cont group 15%E SFA, P/S 0.45, PUFA 6.6%E. **Increase 2.8%E PUFA, most of which n-6.**  
 Baseline n-6: unclear, 6.6%E PUFA, most of which was n-6  
 Compliance: unclear  
 Duration of intervention: 2 years

**Outcomes** Main study outcomes: mortality, reinfarction  
 Dropouts: all followed for events regardless of compliance (ITT)  
 Available outcomes: cardiovascular events (cardiovascular deaths plus non-fatal MI), cancer deaths, total MI, non-fatal MI, total and HDL cholesterol, diagnosis type 2 diabetes  
 Response to contact: Yes, Professor Burr provided additional data and information on methodology

**Notes** Note: This was a 2x2x2 factorial trial, and so some in each group were randomised to increased fatty fish and/or increased cereal fibre.  
 Study funding: Welsh Scheme for Development of Health and Social Research, Welsh Heart Research Foundation, Flora Project (commercial), Health Promotion Research Trust

### Risk of bias table

| Bias                                                      | Authors' judgement | Support for judgement                                                                                                     |
|-----------------------------------------------------------|--------------------|---------------------------------------------------------------------------------------------------------------------------|
| Random sequence generation (selection bias)               | Low risk           | randomised using sealed envelopes                                                                                         |
| Allocation concealment (selection bias)                   | Unclear risk       | Unclear if envelopes were opaque                                                                                          |
| Blinding of participants and personnel (performance bias) | High risk          | Impossible to blind trials where participants need to make their own dietary changes                                      |
| Blinding of outcome assessment (detection bias)           | Low risk           | "outcome assessors were not aware of study allocation" (Prof Burr, personal communication). Method of blinding not stated |
| Incomplete outcome data (attrition bias)                  | Low risk           | GPs contacted for information on mortality and morbidity when patients did not attend                                     |
| Selective reporting (reporting bias)                      | Unclear risk       | No protocol or trials registry entry located                                                                              |
| Attention                                                 | High risk          | More attention was given to those given dietary advice                                                                    |
| Compliance                                                | Unclear risk       | NR                                                                                                                        |
| Other bias                                                | Low risk           | None found                                                                                                                |

### DART fish 1989<sup>20 41 42</sup>

**Methods** Diet And Reinfarction Trial (DART)  
 RCT - parallel, 2x2x2 factorial (n3 EPA+DHA vs nil or fat advice vs not, dietary fibre advice vs not), 2 years  
 Summary risk of bias: Moderate or high

**Participants** Men recovering from myocardial infarction  
 N: 1015 int., 1018  
 Level of risk for CVD: High (post-MI)  
 Male: 100%  
 Mean age, SD: 56.7 int, 56.4 control (SDs not stated)  
 Age range: Unclear  
 Smokers: 61.7% int., 62.2% control  
 Hypertension: 22.7% int., 24.6% control  
 Medications taken by at least 50% of those in the control group: None reported  
 Medications taken by 20-49% : beta-blockers, other antihypertensives, antianginals  
 Medications taken by some, but <20%: anticoagulant, Aspirin/antiplatelet, digoxin/antiarrhythmic  
 Location: UK  
 Ethnicity: not stated

**Interventions** Type: dietary advice (to eat more oily fish)  
 Comparison: EPA & DHA vs nil  
 Intervention: Advised to eat at least 2 weekly portions of 200-400g fatty fish (mackerel, herring, kipper, pilchard, sardine, salmon, trout). If this was not possible, given MaxEPA capsules, 3/d (0.5g

EPA/d). 191 of 883 participants were taking MaxEPA at 2 years. Advice was reinforced 3-monthly:  
 EPA 0.5g/d  
 Control: No such dietary advice or capsules.  
 Compliance: 7 day weighed food diary of a random sub-sample indicated intake of 2.5g/week EPA  
 int., 0.8g/week EPA control.  
 Length of intervention: 24 months

**Outcomes** Main study outcome: total mortality, reinfarction, CHD death  
 Dropouts: none for mortality  
 Available outcomes: total and CV deaths, MI, CHD events, lipids, blood pressure, cancer deaths,  
 diagnosis type 2 diabetes  
 Response to contact: Yes

**Notes** Some of each group were also advised on low fat and high PUFA and/or high fibre diets, all  
 participants who smoked were advised to stop and all with a BMI >30 were given weight reduction  
 advice, regardless of randomisation arm. The low fat high PUFA comparison was included in the  
 omega 6 review.  
 Study funding: By the Welsh Scheme for the Development of Health and Social Research, the Welsh  
 Heart Foundation and the Health Promotion, Research Trust. Seven Seas Health Care and Duncan  
 Flockhart provided MaxEPA capsules

### Risk of bias table

| Bias                                                      | Authors' judgement | Support for judgement                                                                                         |
|-----------------------------------------------------------|--------------------|---------------------------------------------------------------------------------------------------------------|
| Random sequence generation (selection bias)               | Low risk           | "randomised", NB: change to Low following email from Lee on 4.9.17                                            |
| Allocation concealment (selection bias)                   | Unclear risk       | Pre-prepared sequentially numbered enveloped opened by dietitian (unclear if envelopes were opaque)           |
| Blinding of participants and personnel (performance bias) | High risk          | Blinding of dietary advice (or lack of it) is not possible                                                    |
| Blinding of outcome assessment (detection bias)           | Low risk           | Outcome assessors were not aware of study allocation (Prof Burr stated he did not know assignments)           |
| Incomplete outcome data (attrition bias)                  | Low risk           | Hospital notes and death registers were flagged to catch all outcome data                                     |
| Selective reporting (reporting bias)                      | Unclear risk       | No study protocol or trials register entry was found                                                          |
| Attention                                                 | High risk          | More attention was paid to those given dietary advice                                                         |
| Compliance                                                | Unclear risk       | 7 day weighed food diary of a random sub-sample indicated intake of 2.5g/week EPA int., 0.8g/week EPA control |
| Other bias                                                | Low risk           | None noted                                                                                                    |

### Dasarathy 2015<sup>43</sup>

**Methods** RCT, parallel, (n3 EPA & DHA vs n6 LA), 11 months  
 Summary risk of bias: Moderate or high

**Participants** NASH patients with type 2 diabetes  
 N: 18 int., 19 control. (analysed, int: 18 cont: 19)  
 Level of risk for CVD: Moderate  
 Male: 33.3% int., 10.5% control  
 Mean age (SD): 51.5 (6.9) int., 49.8 (12.1) control  
 Age range: NR  
 Smokers: NR  
 Hypertension: 94.4% int., 68.4% control  
 Medications taken by at least 50% of those in the control group: inclusion criteria required stable  
 regiment of anti-diabetic agents.  
 Medications taken by 20-49% of those in the control group: NR  
 Medications taken by some, but less than 20% of the control group: NR  
 Location: USA  
 Ethnicity: 94.4% Caucasian & 5.6% Black int., 89.5% Caucasian & 10.5% Hispanic in control

**Interventions** Type: supplement (capsules with EPA+DHA or corn oil)  
 Comparison: EPA & DHA vs n6 LA

Intervention: 6 capsules/d "Opti-EPA" fish oil concentrate (including 2.16g/d EPA + 3.6g/d DHA, Douglas Laboratories): EPA+DHA 5.76g/d  
 Control: 6 capsules/d corn oil  
 Compliance: Pill counts and patient self-report  
 Duration of intervention: 48 weeks

**Outcomes** Main study outcome: Histology and liver function  
 Dropouts: 0 int., 0 control  
 Available outcomes: Adiposity, lipids, glucose, HOMA, HbA1c, insulin (BMI, total cholesterol, triglycerides and insulin not used due to baseline differences)  
 Response to contact: No

**Notes** Study funding: National Institutes of Health

### Risk of bias table

| Bias                                                      | Authors' judgement | Support for judgement                                                    |
|-----------------------------------------------------------|--------------------|--------------------------------------------------------------------------|
| Random sequence generation (selection bias)               | Unclear risk       | "using a random numbers table"                                           |
| Allocation concealment (selection bias)                   | Unclear risk       | No methodology supplied                                                  |
| Blinding of participants and personnel (performance bias) | Low risk           | Capsules had no visual/odour/taste differences                           |
| Blinding of outcome assessment (detection bias)           | Low risk           | "codes were broken only after primary analysis was completed"            |
| Incomplete outcome data (attrition bias)                  | Low risk           | All included in analysis                                                 |
| Selective reporting (reporting bias)                      | Unclear risk       | Not all registry outcomes clearly reported                               |
| Attention                                                 | Low risk           | No suggestion of this                                                    |
| Compliance                                                | Unclear risk       | Pill count or intake data not reported in percentage terms or equivalent |
| Other bias                                                | Low risk           | None noted                                                               |

### de Luis 2016 <sup>44</sup>

**Methods** RCT, single blind, placebo-controlled (n3 DHA vs MUFA), 6 months  
 Summary risk of bias: Moderate or high

**Participants** Generally healthy individuals with obesity (BMI 30-35)  
 N: 17 int., 17 control. (analysed, int: 14 cont: 15)  
 Level of risk for CVD: low  
 Male: 35.7% int., 46.7% control.  
 Mean age (SD): 47.4(9.1) int., 44.3(11.7) control  
 Age range: 18-65 (inclusion)  
 Smokers: NR  
 Hypertension: NR  
 Medications taken by at least 50% of those in the control group: NR  
 Medications taken by 20-49% of those in the control group: NR  
 Medications taken by some, but less than 20% of the control group: NR  
 Location: Spain  
 Ethnicity: NR

**Interventions** Type: supplement (capsules/pills containing DHA or olive oil)  
 Comparison: Higher DHA vs MUFA  
 Intervention: 500mg/d DHA for first 60 days followed by 250mg/d until 180 days manufactured by Polaris, Pleuven, France  
 Control: placebo pill containing 5 ml olive oil  
**PUFA Dose:** (intended) increase average 0.33g/d EPA+DHA, **0.2%E n-3, 0.2%E PUFA**  
 Compliance: Erythrocyte fatty acid status  
 Duration of intervention: 6 months

**Outcomes** Main study outcome: modification in inflammation-resolving eicosanoid levels  
 Dropouts: 3 int., 2 control  
 Available outcomes: body weight; waist circumference; BMI; fat mass; HOMA-IR; plasma glucose levels; insulin levels; serum total cholesterol, triglyceride, HDL & LDL concentrations; resistin, leptin, adiponectin levels; inflammatory markers: CRP, IL-6, TNF-alpha; red cell membrane fatty acid status

(LDL not used due to baseline differences)  
 Response to contact: Yes (details provided)

**Notes** No conflicts of interest declared; PNKDIET, SLU, Spain provided free of charge the diet of the ketogenic phases in both groups & oral supplementation of DHA/placebo

### Risk of bias table

| Bias                                                      | Authors' judgement | Support for judgement                                                                                                                                         |
|-----------------------------------------------------------|--------------------|---------------------------------------------------------------------------------------------------------------------------------------------------------------|
| Random sequence generation (selection bias)               | Unclear risk       | randomised using table of numbers                                                                                                                             |
| Allocation concealment (selection bias)                   | Unclear risk       | Unclear, no details provided.                                                                                                                                 |
| Blinding of participants and personnel (performance bias) | High risk          | Single blinded, only participants blinded. Insufficient detail regarding appearance, smell or taste of intervention or placebo to assess blinding performance |
| Blinding of outcome assessment (detection bias)           | Unclear risk       | Insufficient information provided                                                                                                                             |
| Incomplete outcome data (attrition bias)                  | High risk          | Outcome data reported for 85.3% of randomised participants                                                                                                    |
| Selective reporting (reporting bias)                      | Low risk           | Primary outcome reported matches trials register                                                                                                              |
| Attention                                                 | Low risk           | Participants in both arms appear to have identical follow-up                                                                                                  |
| Compliance                                                | Low risk           | Measured by fatty acid status data. C-RoB low as $p < 0.05$ in FA DHA levels between arms at 6m                                                               |
| Other bias                                                | Low risk           | None noted                                                                                                                                                    |

### DeFina 2010 <sup>45</sup>

**Methods** RCT, parallel, (n3 EPA+DHA vs n6 LA), 6 months  
 Summary risk of bias: Moderate or high

**Participants** Sedentary men and women with a BMI between 26 and 40  
 N: 64 int., 64 control. (analysed, int: 64 cont: 64)  
 Level of risk for CVD: Low  
 Male: 31.3% int., 31.3% control.  
 Mean age (SD): 45.6 (8.3) int., 47.0 (7.8) control  
 Age range: 30-60 years  
 Smokers: NR  
 Hypertension: 17.2% int., 18.8% control  
 Medications taken by at least 50% of those in the control group: NR  
 Medications taken by 20-49% of those in the control group: NR  
 Medications taken by some, but less than 20% of the control group: NR  
 Location: USA  
 Ethnicity: NR

**Interventions** Type: supplement (capsules with n3 EPA+DHA; or soybean plus corn oil)  
 Comparison: n3 EPA+DHA vs n6 LA  
 Intervention: 5 capsules/d (including 3.0g EPA+DHA in ratio 5:1, Cooper Advanced Omega-3): EPA+DHA 3.0g/d  
 Control: 5 capsules/d (soybean and corn oil in ratio 1:1)  
 Compliance: Plasma fatty acids, pill counts, 3-d dietary records  
 Duration of intervention: 6 months

**Outcomes** Main study outcome: Weight loss and body composition  
 Dropouts: 23 int., 22 control  
 Available outcomes: Anthropometrics, lipids, glucose, insulin, fatty acids. Profile of mood states (POMS). CRP measured, not reported (BP 6 months not used; insulin and HDL cholesterol not used, baseline differences)  
 Response to contact: Yes, methodological details provided

**Notes** Study funding: Cooper Concepts Inc.

### Risk of bias table

| Bias | Authors' | Support for judgement |
|------|----------|-----------------------|
|------|----------|-----------------------|



|                                                           | judgement    |                                                                                                                                                                                                                      |
|-----------------------------------------------------------|--------------|----------------------------------------------------------------------------------------------------------------------------------------------------------------------------------------------------------------------|
| Random sequence generation (selection bias)               | Low risk     | Author confirmed: <i>Participants were randomized to intervention and control arms using a sex and 2-level BMI stratified random block method. The clinical observers were blinded to the randomization process.</i> |
| Allocation concealment (selection bias)                   | Low risk     | As above                                                                                                                                                                                                             |
| Blinding of participants and personnel (performance bias) | Unclear risk | States capsules were identical in colour, shape, and flavour; but smell not reported                                                                                                                                 |
| Blinding of outcome assessment (detection bias)           | Unclear risk | NR                                                                                                                                                                                                                   |
| Incomplete outcome data (attrition bias)                  | Low risk     | Attrition >20%, however balanced by arm, reasons given and intention-to-treat analysis                                                                                                                               |
| Selective reporting (reporting bias)                      | Unclear risk | No registry or protocol identified                                                                                                                                                                                   |
| Attention                                                 | Low risk     | Schedule appears comparable and differs only by capsule                                                                                                                                                              |
| Compliance                                                | Low risk     | Significant increase in plasma EPA and DHA in intervention group                                                                                                                                                     |
| Other bias                                                | Low risk     | None noted                                                                                                                                                                                                           |

## Delamaire 1991 <sup>46</sup>

|                      |                                                                                                                                                                                                                                                                                                                                                                                                                                                                                                            |
|----------------------|------------------------------------------------------------------------------------------------------------------------------------------------------------------------------------------------------------------------------------------------------------------------------------------------------------------------------------------------------------------------------------------------------------------------------------------------------------------------------------------------------------|
| <b>Methods</b>       | RCT, parallel, (n3 EPA & DHA vs n6 LA), 6 months<br>Summary risk of bias: Moderate or high                                                                                                                                                                                                                                                                                                                                                                                                                 |
| <b>Participants</b>  | People with well-controlled insulin-dependant diabetes mellitus (DM)<br>N: 11 int., 17 control. (analysed, int: NR cont: NR)<br>Level of risk for CVD: Moderate<br>Male: NR<br>Mean age (SD): NR<br>Age range: NR<br>Smokers: NR<br>Hypertension: NR<br>Medications taken by at least 50% of those in the control group: NR<br>Medications taken by 20-49% of those in the control group: NR<br>Medications taken by some, but less than 20% of the control group: NR<br>Location: France<br>Ethnicity: NR |
| <b>Interventions</b> | Type: supplement<br>Comparison: MaxEPA vs peanut oil<br>Intervention: 4 capsules/d of MaxEPA (0.7g/d EPA + 0.5g/d DHA): EPA+DHA 1.2g/d<br>Control: 4 capsules/d peanut oil<br>Compliance: NR<br>Duration of intervention: 6 months                                                                                                                                                                                                                                                                         |
| <b>Outcomes</b>      | Main study outcome: haemorheological parameters<br>Dropouts: NR<br>Available outcomes: (sheer rate viscosity, erythrocyte aggregation, fibrinogen - not used)<br>No usable outcomes were reported, but blood sugar parameters were clearly collected as the abstract states "glycaemic balance was unchanged in either group".<br>Response to contact: No                                                                                                                                                  |
| <b>Notes</b>         | Study funding: NR<br>Only abstract found. No replies despite several attempts to contact the author.                                                                                                                                                                                                                                                                                                                                                                                                       |

### Risk of bias table

| Bias                                                      | Authors' judgement | Support for judgement |
|-----------------------------------------------------------|--------------------|-----------------------|
| Random sequence generation (selection bias)               | Unclear risk       | Not reported          |
| Allocation concealment (selection bias)                   | Unclear risk       | Not reported          |
| Blinding of participants and personnel (performance bias) | Unclear risk       | Not reported          |

|                                                 |              |                                                                 |
|-------------------------------------------------|--------------|-----------------------------------------------------------------|
| Blinding of outcome assessment (detection bias) | Unclear risk | Not reported, but biochemistry type outcomes so likely low risk |
| Incomplete outcome data (attrition bias)        | Unclear risk | Not reported                                                    |
| Selective reporting (reporting bias)            | Unclear risk | No protocol or trials registry entry found                      |
| Attention                                       | Unclear risk | Not reported                                                    |
| Compliance                                      | Unclear risk | Not reported                                                    |
| Other bias                                      | Low risk     | None noted                                                      |

## Derosa 2009 <sup>47</sup>

**Methods** RCT, parallel, (n3 EPA+DHA vs non-fat placebo), 6 months  
Summary risk of bias: Moderate or high

**Participants** Italian Caucasian adults with combined dyslipidaemia  
N: 168 int., 164 control. (analysed, int: 165 cont: 162)  
Level of risk for CVD: moderate  
Male: 49% int., 50% control  
Mean age (SD): 51.3 (7.2) int., 50.7 (6.8) control  
Age range: unclear, but inclusion criteria were aged ≥18 years  
Smokers: 22% int, 25% cont  
Hypertension: NR  
Medications taken by at least 50% of those in the control group: NR  
Medications taken by 20-49% of those in the control group: NR  
Medications taken by some, but less than 20% of the control group: NR (no participants were allowed to have taken or be taking medication that would influence lipid metabolism)  
Location: Pravia & Bologna areas of Italy  
Ethnicity: Caucasian

**Interventions** Type: supplement  
Comparison: omega 3 capsules vs sugar pills  
Intervention: 1.125g/d EPA plus 1.875g/d DHA as ethylic esters, split over 3 meals (SPA Societa Prodotti Antibiotici): EPA+DHA 3.0g/d  
Control: pills of sucrose, mannitol and mineral salts, 3g/d split over 3 meals  
**PUFA Dose:** (intended) increase 3.0g/d EPA+DHA, **1.4%E n-3, 1.4%E PUFA**  
Compliance: assessed by pill count returned at clinic visits, but compliance data not reported  
Duration of intervention: 6 months

**Outcomes** Main study outcome: lipid profile, coagulation, inflammatory and fibrinolytic parameters  
Dropouts: 4 of 168 int., 3 of 165 control  
Available outcomes: lipids, glucose, insulin, HOMA, hsCRP (no deaths or MI occurred, 1 cancer diagnosed in each arm but 6 month data), PAI1, homocysteine and several inflammatory markers reported but not used, BMI provided but too different at baseline to use  
Response to contact: Author contacted but this trial not discussed

**Notes** Study funding: SPA (Societa Prodotti Antibiotici) provided medication and paid for publication charges, no other funding reported

### Risk of bias table

| Bias                                                      | Authors' judgement | Support for judgement                                                                                                                                                                                                                                                                                                                            |
|-----------------------------------------------------------|--------------------|--------------------------------------------------------------------------------------------------------------------------------------------------------------------------------------------------------------------------------------------------------------------------------------------------------------------------------------------------|
| Random sequence generation (selection bias)               | Low risk           | "Randomization was done using a drawing of envelopes containing randomization codes prepared by a statistician. A copy of the code was provided only to the responsible person performing the statistical analysis. The code was only broken after a database lock, but could have been broken for individual subjects in case of an emergency." |
| Allocation concealment (selection bias)                   | Unclear risk       | As above- no information provided on opacity of envelopes.                                                                                                                                                                                                                                                                                       |
| Blinding of participants and personnel (performance bias) | High risk          | No suggestion that pills were similar, and given different compositions there were unlikely to be                                                                                                                                                                                                                                                |
| Blinding of outcome assessment (detection bias)           | Unclear risk       | Unclear, code was masked, but participants were likely to have known their allocation                                                                                                                                                                                                                                                            |

|                                          |              |                                                                     |
|------------------------------------------|--------------|---------------------------------------------------------------------|
| Incomplete outcome data (attrition bias) | Unclear risk | Low dropout level, though no explanations of attrition provided     |
| Selective reporting (reporting bias)     | Unclear risk | No trials registry entry or protocol found                          |
| Attention                                | Low risk     | Appointments appeared similar in schedule and duration between arms |
| Compliance                               | Unclear risk | No body tissue levels or pill count data provided                   |
| Other bias                               | Low risk     | None noted                                                          |

## Derosa 2011 <sup>48,49</sup>

|                      |                                                                                                                                                                                                                                                                                                                                                                                                                                                                                                                                                                                                                                                                                                                                                                                                                                                                              |
|----------------------|------------------------------------------------------------------------------------------------------------------------------------------------------------------------------------------------------------------------------------------------------------------------------------------------------------------------------------------------------------------------------------------------------------------------------------------------------------------------------------------------------------------------------------------------------------------------------------------------------------------------------------------------------------------------------------------------------------------------------------------------------------------------------------------------------------------------------------------------------------------------------|
| <b>Methods</b>       | RCT, parallel, (EPA+DHA vs non-fat placebo), 6 months<br>Summary risk of bias: Moderate or high                                                                                                                                                                                                                                                                                                                                                                                                                                                                                                                                                                                                                                                                                                                                                                              |
| <b>Participants</b>  | White adults with combined lipidaemia (raised total cholesterol and TG)<br>N: 84 int., 83 control (analysed 78 int., 79 control).<br>Level of risk for CVD: Moderate<br>Male: 49% int., 49% control.<br>Mean age (SD): 54.5 (7.0) overall, not given by arm<br>Age range: NR but inclusion criteria were 18-75 years<br>Smokers: 27% int., 31% control<br>Hypertension: 51.5% with history of hypertension (not given by arm)<br>Medications taken by at least 50% of those in the control group: NR<br>Medications taken by 20-49% of those in the control group: NR<br>Medications taken by some, but less than 20% of the control group: ACE inhibitors, ARBs, calcium antagonists, beta-blockers, diuretics, alpha-blockers<br>Location: Italy<br>Ethnicity: White                                                                                                       |
| <b>Interventions</b> | Type: Capsule (n-3 PUFA)<br>Comparison: EPA & DHA vs filler (non-fat)<br>Intervention: 3x1g capsule/ day n-3 PUFAs (ethyl esters, each 1-g capsule of n-3 PUFAs contains 85% n3 ethyl esters), total 1.2g/d EPA + 1.35g/d DHA plus controlled diet with 600kcal deficit, 50% CHO, 30% fat, 6% SFA, 20% protein, increased physical activity: EPA+DHA 2.55g/d<br>Control: placebo (capsule containing sucrose, mannitol and mineral salts magnesium stearate and silicon dioxide, used as anti-caking agents) plus controlled diet with 600kcal deficit, 50% CHO, 30% fat, 6% SFA, 20% protein, increased physical activity<br><b>PUFA Dose:</b> (intended) increase 2.55g/d EPA+DHA, <b>1.2%E n-3, 1.2%E PUFA</b><br>Compliance: measured by counting the number of pills returned at the time of specified clinic visits, no data found<br>Length of intervention: 6 months |
| <b>Outcomes</b>      | Main study outcome: insulin-resistance<br>Dropouts: 6 int, 4 control<br>Available outcomes: weight, lipids, fasting glucose, HOMA-IR, other markers of insulin sensitivity, hsCRP, s-ICAM, s-VCAM, TNF alpha, E-selectin, IL-6 (BP reported but not used as 6 month data, metalloproteinases reported, fasting insulin, HOMA, BMI reported but not used as too unbalanced at baseline)<br>Response to contact: yes                                                                                                                                                                                                                                                                                                                                                                                                                                                           |
| <b>Notes</b>         | Study funding: NR, "The authors certify that they have no affiliation with, or financial involvement in, any organization or entity with a direct financial interest in the subject matter or materials discussed in the manuscript"                                                                                                                                                                                                                                                                                                                                                                                                                                                                                                                                                                                                                                         |

### Risk of bias table

| Bias                                                      | Authors' judgement | Support for judgement                                                                                                                                                               |
|-----------------------------------------------------------|--------------------|-------------------------------------------------------------------------------------------------------------------------------------------------------------------------------------|
| Random sequence generation (selection bias)               | Low risk           | "randomisation was done using a drawing of envelopes containing randomisation codes prepared by a statistician"                                                                     |
| Allocation concealment (selection bias)                   | Unclear risk       | Unclear whether envelopes were thick enough to be opaque                                                                                                                            |
| Blinding of participants and personnel (performance bias) | Unclear risk       | n-3 and placebo supplied as identical, opaque, white capsules in coded bottles to ensure the blind status of the study - However no information provided on capsules taste or smell |

Additional Tables and Figures, PUFA & DM SR, page 35

|                                                 |              |                                                                                                                                               |
|-------------------------------------------------|--------------|-----------------------------------------------------------------------------------------------------------------------------------------------|
| Blinding of outcome assessment (detection bias) | Low risk     | States "double blind", and code only broken after database lock                                                                               |
| Incomplete outcome data (attrition bias)        | Unclear risk | Numbers shown at baseline don't add up to the total number randomised, but ITT analysis for those receiving at least one dose of the capsules |
| Selective reporting (reporting bias)            | Unclear risk | No registry entry or protocol found                                                                                                           |
| Attention                                       | Unclear risk | Frequency of contact appears similar for both groups, and blinded                                                                             |
| Compliance                                      | Unclear risk | Unclear as data not provided on compliance                                                                                                    |
| Other bias                                      | Low risk     | None noted                                                                                                                                    |

## Derosa 2016 <sup>5</sup>

**Methods** RCT, parallel, (EPA+DHA vs non-fat placebo), 18 months  
Summary risk of bias: Low

**Participants** Caucasian overweight/obese patients with impaired fasting glucose (IFG) or impaired glucose tolerance (IGT) but not on meds affecting glucose metabolism  
N: 138 int., 143 control (analysed 128 int., 130 control).  
Level of risk for CVD: Low  
Male: 50.72% int., 48.95% control.  
Mean age (SD): 53.4 (11.2) int., 54.8 (12.1) control  
Age range: unclear  
Smokers: NR  
Hypertension: NR  
Medications taken by at least 50% of those in the control group: NR  
Medications taken by 20-49% of those in the control group: NR  
Medications taken by some, but less than 20% of the control group: NR  
Location: Italy  
Ethnicity: Caucasian

**Interventions** Type: Capsule (n-3 PUFA)  
Comparison: EPA & DHA vs filler (non-fat)  
Intervention: 3x1g capsule/ day n-3 PUFAs (ethyl esters, each 1-g capsule of n-3 PUFAs contains highly concentrated ethyl esters of omega-3 fatty acids, primarily eicosapentaenoic acid [EPA], and docosahexaenoic acid [DHA] in the proportion of 0.9–1.5), exact daily contents unclear, assume approx. 2.55g/d EPA+DHA  
Control: placebo (a capsule containing sucrose, mannitol and mineral salts magnesium stearate and silicon dioxide, used as anti-caking agents)  
Both groups were given diet advice to follow a controlled-energy diet based on (AHA) recommendations (50% of calories from carbohydrates, 30% from fat (6% saturated), and 20% from proteins, with a maximum cholesterol content of 300 mg/day and 35 g/day of fibre). Individuals were also encouraged to increase their physical activity by walking briskly for 20 to 30 Min, 3 to 5 times per week, or by cycling.  
Compliance: measured by counting the number of pills returned at the time of specified clinic visits  
Length of intervention: 18 months

**Outcomes** Main study outcome: insulin-resistance  
Dropouts: 23 across arms (no details on groups but stated that there were no difference between groups)  
Available outcomes: weight, BMI, lipids, diabetes mellitus, HOMA, insulin, authors provided information on mortality, cardiovascular mortality, CHD, stroke, MI, glucose, depression, atrial fibrillation  
Response to contact: Yes

**Notes** Glucose data is provided by impaired fasting glucose or impaired glucose intolerance groups  
Study funding: "The authors have no relevant affiliations or financial involvement with any organization or entity with a financial interest in or financial conflict with the subject matter or materials discussed in the manuscript. This includes employment, consultancies, honoraria, stock ownership or options, expert testimony, grants or patents received or pending, or royalties"

### Risk of bias table

| Bias | Authors' judgement | Support for judgement |
|------|--------------------|-----------------------|
|------|--------------------|-----------------------|

|                                                           |              |                                                                                                                                                                         |
|-----------------------------------------------------------|--------------|-------------------------------------------------------------------------------------------------------------------------------------------------------------------------|
| Random sequence generation (selection bias)               | Low risk     | Randomization was done using a drawing of envelopes containing randomisation codes prepared by a statistician.                                                          |
| Allocation concealment (selection bias)                   | Low risk     | Authors replied that the researcher who recruited participants was not aware of which arm the participant would be allocated to, but methodology for this not provided. |
| Blinding of participants and personnel (performance bias) | Low risk     | Both n-3 PUFAs and placebo were supplied as identical, opaque, white capsules in coded bottles to ensure the blind status of the study.                                 |
| Blinding of outcome assessment (detection bias)           | Low risk     | A copy of the code was provided only to the person performing the statistical analysis.                                                                                 |
| Incomplete outcome data (attrition bias)                  | Low risk     | An intention to treat analysis was conducted for patients who received 1 dose of study medication                                                                       |
| Selective reporting (reporting bias)                      | Unclear risk | No trial registry or protocol found                                                                                                                                     |
| Attention                                                 | Low risk     | No difference reported                                                                                                                                                  |
| Compliance                                                | Unclear risk | Measured by counting the number of pills returned at the time of specified clinic visits                                                                                |
| Other bias                                                | Low risk     | None noted                                                                                                                                                              |

## Deslypere 1992 <sup>50-52</sup>

**Methods** RCT 4 arms, (n3 EPA+DHA (3 different doses) vs MUFA), 12 months  
Summary risk of bias: Moderate or high

**Participants** Healthy monks  
N: 14 high, 15 medium, 15 low dose int., 14 control  
Level of risk for CVD: Low  
Male: 100%  
Mean age (SD): 56.2 (16.5) (not reported by arm).  
Age range: 21-87  
Smokers: None.  
Hypertension: NR  
Medications taken by at least 50% of those in the control group: NR  
Medications taken by 20-49% of those in the control group: NR  
Medications taken by some, but less than 20% of the control group: NR. (No medications influencing lipid metabolism or non-steroidal anti-inflammatory drugs were allowed)  
Location: The Netherlands  
Ethnicity: NR

**Interventions** Type: Capsules  
Comparison: LCN3 vs MUFA  
Intervention 9 capsules (9g vol.) per day, of which 3, 6 or 9 were fish oil (Labaz, Brussels, Belgium) & any remainder were placebo (providing respectively 1.12g/d; 2.24g/d or 3.37g/d EPA+DHA)  
Control: 9 placebo capsules made up of olive oil (Puget Marseille, France) and Palmoil (Loders-Kroklaan Wormerveen, the Netherlands) with the same SFA, cholesterol and vit E as the fish oil capsules.  
Compliance: assessed by counting remaining capsules every 2 months and by measuring EPA concentration. Excellent compliance reported and shown by the EPA concentration results.  
Length of intervention: 12 months.

**Outcomes** Main study outcome: Effect on coronary risk factors  
Dropouts: None  
Available outcomes: deaths (nil), CVD events (nil), Lipids, BP, HbA1c, weight (measured but not reported)  
Response to contact: Yes

**Notes** Study funding: capsules supplied by Labaz (Brussels Belgium). The placebo capsules contained olive oil (Puget) and palm oil (Loders-Kroklaan, Wormerveer). Financial support by Sanofi-Labaz.  
Data entered for high fish oil versus placebo groups

### Risk of bias table

| Bias | Authors' judgement | Support for judgement |
|------|--------------------|-----------------------|
|------|--------------------|-----------------------|

|                                                           |              |                                                                                                                                                                             |
|-----------------------------------------------------------|--------------|-----------------------------------------------------------------------------------------------------------------------------------------------------------------------------|
| Random sequence generation (selection bias)               | Low risk     | "The manufacturer provided envelopes containing numbers corresponding with boxes of capsules. For each enrolled subject, random envelope was opened." author correspondence |
| Allocation concealment (selection bias)                   | Low risk     | No further details, but method (above) suggests that the person enrolling a participant would have been blinded to allocation, and authors confirm this.                    |
| Blinding of participants and personnel (performance bias) | High risk    | Although double blind, the fishy taste of the active treatment was not matched.                                                                                             |
| Blinding of outcome assessment (detection bias)           | Low risk     | Authors confirmed outcome assessors were unaware until afterwards.                                                                                                          |
| Incomplete outcome data (attrition bias)                  | Low risk     | No drop outs                                                                                                                                                                |
| Selective reporting (reporting bias)                      | Unclear risk | No protocol or trial registry record                                                                                                                                        |
| Attention                                                 | Low risk     | No difference between groups                                                                                                                                                |
| Compliance                                                | Low risk     | Significant difference in EPA concentration                                                                                                                                 |
| Other bias                                                | Low risk     | None noted                                                                                                                                                                  |

## DIPP-Tokudome 2015 <sup>53 54</sup>

**Methods** Dietary Intervention for Patients Polypectomized for tumours of the colorectum (DIPP) RCT, parallel, 2 arms (n3 EPA+DHA + n3 ALA vs nil), 24 months  
Summary risk of bias: Moderate or high

**Participants** Patients previously polypectomised for colorectal tumours  
N: 104 int., 101 control.  
Level of risk for CVD: Low  
Male: 73.1% int., 74.3% control.  
Mean age (SD): 58.3 (9.5) int., 59.7 (8.9) control  
Age range: 35-75  
Smokers: 65.4% int., 61.4% control  
Hypertension: NR.  
Medications taken by at least 50% of those in the control group: Supplements  
Medications taken by 20-49% of those in the control group: None  
Medications taken by some, but less than 20% of the control group: Oral contraceptive pills  
Location: Japan  
Ethnicity: NR

**Interventions** Type: advice plus supplement (fish oil capsules)  
Comparison: EPA & DHA + ALA vs nil  
Intervention: advice to 1) Reduce total fat intake, 2) Decrease consumption of n-6 PUFAs, increase intake of n-3 PUFAs from fish/marine foods  
3) Increase intake of n-3 PUFAs from perilla oil rich in ALA, 4) Take 8 capsules of fish oil/day (equivalent to 96 mg/day of EPA and 360 mg/day of DHA)  
Control: advice to decrease intake of fats/oils as a whole  
Compliance: measured via semi-quantitative food frequency questionnaire, plasma fatty acid concentrations, fatty acid compositions in the membranes of red blood cells and the sigmoid colon.  
Reported satisfactorily high compliance with protocol was noted in both groups but no figures.  
Length of intervention: 24 months

**Outcomes** Main study outcome: Number and size of colorectal tumours  
Dropouts: 3 int., 5 control  
Available outcomes: All-cause mortality, dietary intake, plasma fatty acids, lipids, side effects, glucose.  
Response to contact: Yes (methodological details provided)

**Notes** Study funding: All were either government or charity grants.

### Risk of bias table

| Bias                                        | Authors' judgement | Support for judgement                                                               |
|---------------------------------------------|--------------------|-------------------------------------------------------------------------------------|
| Random sequence generation (selection bias) | Low risk           | Randomly allocated using random digit number for allocation of participants.        |
| Allocation concealment (selection bias)     | Low risk           | Author confirmed "Allocation information was blinded to clinicians and researchers" |

|                                                           |              |                                                                                                                                                                                                                                                                                                                                                                                               |
|-----------------------------------------------------------|--------------|-----------------------------------------------------------------------------------------------------------------------------------------------------------------------------------------------------------------------------------------------------------------------------------------------------------------------------------------------------------------------------------------------|
| Blinding of participants and personnel (performance bias) | Unclear risk | From the 2015 paper, 'The attending physicians as well as the participants were blinded to the assignment information'. However, in the discussion section they say 'complete participant blinding could not have been achieved because free living participants might have exchanged information on their dietary intervention, say in the hospital waiting room'. Author confirmed blinding |
| Blinding of outcome assessment (detection bias)           | Low risk     | 'physicians, including colonoscopists, a scientist who conducted blood and specimen analyses, and pathologists were blinded'.                                                                                                                                                                                                                                                                 |
| Incomplete outcome data (attrition bias)                  | Low risk     | All those randomised were accounted for.                                                                                                                                                                                                                                                                                                                                                      |
| Selective reporting (reporting bias)                      | High risk    | The researchers chose not to report data on the number, size and pathological type of the colorectal tumours as they said they would in the trials register. They reported more outcomes in the paper than initially stated. UMIN000000461 Registered 03/08/2006, recruitment completed 01/03/2007                                                                                            |
| Attention                                                 | Low risk     | Participants were given equal follow-up.                                                                                                                                                                                                                                                                                                                                                      |
| Compliance                                                | Unclear risk | paper reported satisfactory compliance but this was not defined                                                                                                                                                                                                                                                                                                                               |
| Other bias                                                | Low risk     | None noted                                                                                                                                                                                                                                                                                                                                                                                    |

## DO IT - Einvik 2010 <sup>55</sup>

|                      |                                                                                                                                                                                                                                                                                                                                                                                                                                                                                                                                                                                                                                                                                                                                                                                                                   |
|----------------------|-------------------------------------------------------------------------------------------------------------------------------------------------------------------------------------------------------------------------------------------------------------------------------------------------------------------------------------------------------------------------------------------------------------------------------------------------------------------------------------------------------------------------------------------------------------------------------------------------------------------------------------------------------------------------------------------------------------------------------------------------------------------------------------------------------------------|
| <b>Methods</b>       | Diet and Omega 3 Intervention Trial on Atherosclerosis (DO IT)<br>Randomisation: RCT, parallel, 2x2 factorial (n3 DHA+EPA vs n6 LA also dietary advice intervention), 36 months<br>Summary risk of bias: Moderate or high                                                                                                                                                                                                                                                                                                                                                                                                                                                                                                                                                                                         |
| <b>Participants</b>  | Elderly men with long standing dyslipidaemia or hypertension (a subset of Oslo Diet heart study)<br>N: Int 282 (140 n-3 capsules + 142 n-3 capsules & dietary advice), Control 281 (142 placebo capsules + 139 placebo capsules & dietary advice)<br>Level of risk for CVD: Moderate<br>Male: Int 100%, Control 100%<br>Mean age (SD): Int 70.4 (2.9), Control 69.7 (3.0) years<br>Age range: 64-76 years<br>Smokers: Int 35%, Control 33%<br>Hypertension: Int 29%, Control 27%<br>Medications taken by at least 50% of those in the control group: None<br>Medications taken by 20-49% of those in the control group: statins and Acetylsalicylic acid.<br>Medications taken by some, but less than 20% of the control group: beta-blockers, ACE-inhibitors, and Nitrates.<br>Location: Norway<br>Ethnicity: NR |
| <b>Interventions</b> | Type: supplement/ capsule (also dietary advice as the factorial intervention)<br>Comparison: EPA & DHA vs omega 6<br>Intervention: 2x2 capsules/d inc 2.4g/d of omega 3 PUFA (Pikasol, 0.84g/d EPA plus 0.48g/d DHA plus 8.4mg/d tocopherols): EPA+DHA 1.32g/d<br>Control: 2x2 capsules/d inc 4g/d corn oil (2.24 g/d linoleic, 1.28g/d oleic acid, 16mg/d tocopherols)<br>Compliance: pharmacy records suggested that >90% of supplements were taken, and plasma EPA and DHA were raised in intervention compared to control participants.<br>Duration of intervention: 36 months.                                                                                                                                                                                                                               |
| <b>Outcomes</b>      | Main study outcome: atherosclerosis progression.<br>Dropouts: Int 14 died, 20 others discontinued, Control 24 died, 18 others discontinued.<br>Available outcomes: Mortality, cardiovascular deaths, CHD events, CV events, MI, stroke, diabetes, glucose, lipids, cancer diagnosis, cancer deaths, sudden death (authors have provided additional information on HADS depression and anxiety, and diabetes diagnosis, glucose, HbA1c, insulin)<br>Response to contact: Yes                                                                                                                                                                                                                                                                                                                                       |
| <b>Notes</b>         | The other 2x2 intervention was dietary advice to increase both omega 3 and omega 6 fats. These data were included in the total PUFA review.<br>Study funding: Norwegian Cardiovascular Council, Norwegian retail company RIMI, vegetable oil and                                                                                                                                                                                                                                                                                                                                                                                                                                                                                                                                                                  |

margarine supplied by the Norwegian food company Mills DA and placebo capsules by LUBE.

### Risk of bias table

| Bias                                                      | Authors' judgement | Support for judgement                                                                                                                                                             |
|-----------------------------------------------------------|--------------------|-----------------------------------------------------------------------------------------------------------------------------------------------------------------------------------|
| Random sequence generation (selection bias)               | Low risk           | Permuted block randomisation                                                                                                                                                      |
| Allocation concealment (selection bias)                   | Unclear risk       | No details provided                                                                                                                                                               |
| Blinding of participants and personnel (performance bias) | Unclear risk       | Capsules of fish oil or placebo taken, but unclear whether blinded and if so, how well or successfully                                                                            |
| Blinding of outcome assessment (detection bias)           | Low risk           | "Mortality data were supplied from the Norwegian Cause of Death Registry, and all clinical events were confirmed by hospital records and verified by an independent cardiologist" |
| Incomplete outcome data (attrition bias)                  | Low risk           | No attrition as deaths and events collected from centralised register                                                                                                             |
| Selective reporting (reporting bias)                      | Unclear risk       | Trials registry entry submitted after the outcomes papers were published                                                                                                          |
| Attention                                                 | Low risk           | No suggestion of attention bias between verum and placebo supplement arms                                                                                                         |
| Compliance                                                | Low risk           | Pharmacy records suggested that >90% of supplements were taken, and plasma EPA and DHA were raised in intervention compared to control participants.                              |
| Other bias                                                | Low risk           | None noted                                                                                                                                                                        |

### Dodin 2005 <sup>56 57</sup>

**Methods** RCT, parallel, (n3 ALA vs n6 LA), 12 months  
Summary risk of bias: Moderate or high

**Participants** Healthy menopausal women  
N: 101 int., 98 control. (analysed, int: 85 cont: 94)  
Level of risk for CVD: Low  
Male: 0% int., 0% control.  
Mean age (SD): 54.0 (4.0) int., 55.4 (4.5) control  
Age range: 49-65  
Smokers: 8% int., 6% control  
Hypertension: NR  
Medications taken by at least 50% of those in the control group: NR  
Medications taken by 20-49% of those in the control group: NR  
Medications taken by some, but less than 20% of the control group: NR  
Location: Canada  
Ethnicity: French Canadian

**Interventions** Type: food supplement (flaxseed)  
Comparison: more ALA vs less ALA  
Intervention: 40g/d flaxseed incorporated into diets (providing 21,071g total lignans, 180 calories, 16g lipids (57% ALA), and 11g total dietary fibre): 9.1g/d ALA  
Control: 40g/d wheat germ incorporated into diets (providing 196g total lignans, 144 calories, 4g lipids (6.9% ALA), and 6g total dietary fibre  
Compliance: first morning urine collection was performed at randomisation and at month 12 to measure urinary lignin levels. In addition, study participants recorded their daily intake of seeds on diary cards and were asked to return unused bread and packages of seeds at each visit. Good compliance reported  
Duration of intervention: 12 months

**Outcomes** Main study outcome: Bone mineral density  
Dropouts: 26 int., 17 control (but 13/17 had an endpoint evaluation)  
Available outcomes: Weight, BMI, QoL, Blood Pressure, lipids, glucose, adverse events, dietary intake, plasma fatty acids  
Response to contact: Yes

**Notes** Authors replied to tell us that there were no deaths or CV events during the study  
Study funding: Not reported



## Risk of bias table

| Bias                                                      | Authors' judgement | Support for judgement                                                                                                                                                                                                                                                                                                                                                                                                                                                                                                                                                                                                                                                                                                                                                  |
|-----------------------------------------------------------|--------------------|------------------------------------------------------------------------------------------------------------------------------------------------------------------------------------------------------------------------------------------------------------------------------------------------------------------------------------------------------------------------------------------------------------------------------------------------------------------------------------------------------------------------------------------------------------------------------------------------------------------------------------------------------------------------------------------------------------------------------------------------------------------------|
| Random sequence generation (selection bias)               | Low risk           | The randomisation schedule was prepared by the clinical unit of the research centre using computer generated randomisation in blocks of four to eight                                                                                                                                                                                                                                                                                                                                                                                                                                                                                                                                                                                                                  |
| Allocation concealment (selection bias)                   | Unclear risk       | No details                                                                                                                                                                                                                                                                                                                                                                                                                                                                                                                                                                                                                                                                                                                                                             |
| Blinding of participants and personnel (performance bias) | Low risk           | Subjects, investigators, staff, and statisticians were blinded to dietary assignments for the duration of the study.<br>"a local baker prepared loaves of bread. Each week, the loaves of bread were delivered in sealed, opaque unmarked wrappers to the Department of Food and Nutrition Sciences at Laval University. The seeds were ground up and vacuum-packed in the same laboratory. The Department of Food and Nutrition Sciences was responsible for labelling the bags of bread and packages of seeds with the subject's randomization number. Bread and packages of seeds were provided on a 3-month basis. The foods that both groups received was similar in appearance and packaging and was kept frozen until consumption to avoid essential fatty acid |
| Blinding of outcome assessment (detection bias)           | Low risk           | Subjects, investigators, staff, and statisticians were blinded to dietary assignments for the duration of the study                                                                                                                                                                                                                                                                                                                                                                                                                                                                                                                                                                                                                                                    |
| Incomplete outcome data (attrition bias)                  | Low risk           | Intention to treat analysis. Loss to follow up 10%, reasons given.                                                                                                                                                                                                                                                                                                                                                                                                                                                                                                                                                                                                                                                                                                     |
| Selective reporting (reporting bias)                      | Unclear risk       | No protocol or clinical trial registry entry found                                                                                                                                                                                                                                                                                                                                                                                                                                                                                                                                                                                                                                                                                                                     |
| Attention                                                 | Low risk           | All participants had same number of visits                                                                                                                                                                                                                                                                                                                                                                                                                                                                                                                                                                                                                                                                                                                             |
| Compliance                                                | Low risk           | First morning urine collection was performed at randomisation and at month 12 to measure urinary lignin levels. In addition, study participants recorded their daily intake of seeds on diary cards and were asked to return unused bread and packages of seeds at each visit. Good compliance reported                                                                                                                                                                                                                                                                                                                                                                                                                                                                |
| Other bias                                                | Low risk           | None noted                                                                                                                                                                                                                                                                                                                                                                                                                                                                                                                                                                                                                                                                                                                                                             |

## Dullaart 1992<sup>19</sup>

**Methods** RCT, parallel, 2 arms (n6 vs mixed fats), 2 years  
Summary risk of bias: Moderate or high

**Participants** Type I diabetics with elevated urinary albumin  
CVD risk: moderate  
Control: randomised 20, analysed 20  
Intervention: randomised 18, analysed 16  
% male: 81% int., 75% control  
Age: mean(SD) control 41(14), intervention 44(12)  
Age range: Unclear (21-65 inclusion)  
Smokers: control 55%, int 50%  
Hypertension: cont 10%, int 6%  
Medications taken by at least 50% of those in the control group: Insulin  
Medications taken by 20-49% of those in the control group: NR  
Medications taken by some, but less than 20% of the control group: anti-hypertensives  
Location: Netherlands  
Ethnicity: NR

**Interventions** Type: dietary advice  
Comparison: LA (n6) vs usual diet  
Intervention: Diet advice given at every visit throughout the 2-year period to increase linoleic acid

achieving a polyunsaturated: saturated fatty acid ratio close to 1.0. Advice to replace butter or saturated margarines by polyunsaturated margarines and to restrict the intake of saturated fat from meat and milk products

Control: to continue their usual diet. All participants were urged not to alter total fat and protein content.

**Dose:** (intake data) int group 13%E SFA, P/S 0.985, PUFA 9.4%E. Cont group 15%E SFA, P/S 0.45, PUFA 6.6%E. **Increase 2.8%E PUFA, most of which n-6.**

Baseline n-6: unclear, 6.6%E PUFA, most of which was n-6

Compliance: unclear

Duration of intervention: 2 years

**Outcomes** Main study outcomes: albuminuria and lipids  
Dropouts: int 2 of 20, cont 4 of 20  
Available outcomes: weight, HDL cholesterol, TGs, HbA1c (total cholesterol, glucose, insulin reported but too different at baseline to use, LDL not reported in control group, renal outcomes such as GFR, albuminuria, mean arterial pressure not used)  
Response to contact: Yes

**Notes** Most outcomes are estimated from figures.  
Study funding: Dutch Diabetes Research Fund

### Risk of bias table

| Bias                                                      | Authors' judgement | Support for judgement                                                                                                                                                                                        |
|-----------------------------------------------------------|--------------------|--------------------------------------------------------------------------------------------------------------------------------------------------------------------------------------------------------------|
| Random sequence generation (selection bias)               | Low risk           | "patients were stratified according to sex and randomised in blocks of ten men and six women"                                                                                                                |
| Allocation concealment (selection bias)                   | Low risk           | assigned using opaque sealed envelopes by independent statistical investigator with no contact with participants                                                                                             |
| Blinding of participants and personnel (performance bias) | High risk          | No information on blinding. Participants could not be blinded as they received dietary advice.                                                                                                               |
| Blinding of outcome assessment (detection bias)           | Unclear risk       | No details                                                                                                                                                                                                   |
| Incomplete outcome data (attrition bias)                  | Unclear risk       | No details on drop outs apart from the exclusion of 2 intervention participants from the trial due to pregnancy and decision not to participate.                                                             |
| Selective reporting (reporting bias)                      | Unclear risk       | No protocol or trial registration.                                                                                                                                                                           |
| Attention                                                 | High risk          | Intervention groups received diet advice at every visit. As the control group were advised to stick with their usual diet, it seems likely that the intervention group received more time on dietary advice. |
| Compliance                                                | High risk          | Compliance poor as assessed by biomarkers                                                                                                                                                                    |
| Other bias                                                | Low risk           | None noted                                                                                                                                                                                                   |

### Ebrahimi 2009 <sup>58 59</sup>

**Methods** RCT, parallel, (n3 EPA+DHA vs nil), 6 months  
Summary risk of bias: Moderate or high

**Participants** People with metabolic syndrome  
N: 60 int., 60 control. (analysed, int: 47 cont: 43)  
Level of risk for CVD: moderate  
Male: 15% int., 9% control.  
Mean age (SD): 53.5 (12.7) int., 52.3 (11.1) control  
Age range: NR but 40-70yrs inclusion criteria  
Smokers: 4% int., 2% control  
Hypertension: 32% int., 32% control  
Medications taken by at least 50% of those in the control group: NR  
Medications taken by 20-49% of those in the control group: NR  
Medications taken by some, but less than 20% of the control group: antihypertensives (14.3%), antidiabetic medication (16.7%)  
Location: Iran  
Ethnicity: NR

**Interventions** Type: supplement  
 Comparison: EPA+DHA vs nil (no placebo)  
 Intervention: 1x1g capsule of fish oil/d (180mg/d EPA, 120mg/d DHA): EPA+DHA 3.0g/d  
 Control: nil, no placebo  
**PUFA Dose:** (intended) increase 3.0g/d EPA+DHA, **1.4%E n-3, 1.4%E PUFA**  
 Compliance: assessed by counting tablets at weekly visits and those who did not take their capsules were excluded but unclear how many this was (and not feasible in control group)  
 Duration of intervention: 6 months

**Outcomes** Main study outcome: "several anthropometric and biochemical parameters"  
 Dropouts: 13/60 int., 17/60 control (this probably combines dropouts and exclusions)  
 Available outcomes: weight, BMI, total chol, HDL & LDL chol, fasting glucose (TGs and hsCRP provided as medians, BP given but only 6 months, heat shock protein not relevant)  
 Response to contact: No contact attempted

**Notes** Study funding: Mashhad University of Medical Science Research Council

**Risk of bias table**

| Bias                                                      | Authors' judgement | Support for judgement                                                                                                                                                                |
|-----------------------------------------------------------|--------------------|--------------------------------------------------------------------------------------------------------------------------------------------------------------------------------------|
| Random sequence generation (selection bias)               | Unclear risk       | "randomly allocated" - no further details                                                                                                                                            |
| Allocation concealment (selection bias)                   | Unclear risk       | no information                                                                                                                                                                       |
| Blinding of participants and personnel (performance bias) | High risk          | No placebo used                                                                                                                                                                      |
| Blinding of outcome assessment (detection bias)           | Unclear risk       | Blinding not mentioned                                                                                                                                                               |
| Incomplete outcome data (attrition bias)                  | High risk          | 30/120 (25%) lost over 6 months                                                                                                                                                      |
| Selective reporting (reporting bias)                      | Unclear risk       | No protocol or trials register entry found                                                                                                                                           |
| Attention                                                 | High risk          | Paper states that weekly visits were used to promote and assess compliance, but presumably these did not happen in the control group as there was no placebo to encourage or assess. |
| Compliance                                                | Unclear risk       | Unclear how many did not comply fully (and so were excluded)                                                                                                                         |
| Other bias                                                | Low risk           | None noted                                                                                                                                                                           |

**EPE-A 2014**<sup>60</sup>

**Methods** EPE-A  
 RCT, parallel, 3 arms (n3 EPA, low dose vs high dose vs unclear placebo), 12 months  
 Summary risk of bias: Moderate or high

**Participants** People with non-alcoholic steatohepatitis (NASH) and non-alcoholic fatty liver disease (NAFLD)  
 N: 86 high dose, 82 low dose, 75 control. (analysed 64, 55, 55 respectively, ITT analysis for primary outcomes)  
 Level of risk for CVD: Low (although 35% had type II diabetes)  
 Male: 33.7% high dose, 41.5% low dose, 42.7% control.  
 Mean age (SD): 47.8 (11.1) high dose, 47.8 (12.5) low dose, 50.5 (12.5) control  
 Age range: NR  
 Smokers: NR  
 Hypertension: NR  
 Medications taken by at least 50% of those in the control group: NR  
 Medications taken by 20-49% of those in the control group: NR  
 Medications taken by some, but less than 20% of the control group: NR  
 Location: USA  
 Ethnicity:  
 white low dose: 94% high dose: 87% cont: 90.7%  
 African American low dose: 3.7% high dose: 2.3% cont: 4.0%  
 Others low dose: 2.4% high dose: 10.5% cont: 5.3%

**Interventions** Type: Supplement (Omega 3 capsule)  
 Comparison 1: high EPA vs low EPA

Comparison 2: EPA vs placebo (placebo contents not reported)  
 Intervention: High: EPA-E 2.7g/d, 3x EPA-E 300 mg capsules: EPA+DHA 2.7g/d  
 Low: EPA-E 1.8g/d, 2x EPA-E 300 mg capsules + 1placebo capsule: EPA+DHA 1.8g/d  
 Control: 3x placebo capsules- content NR  
 Compliance: was estimated by pill count and measuring the ratio of serum EPA to arachidonic acid.  
 compliance rates for the 3 groups (placebo vs EPA-E 1800 mg/d vs EPA-E 2700 mg/d) were 89.5% (6.8%), 90.3%(5.7%) and 89.5%(5.3%) respectively.  
 Length of intervention: 12 months

- Outcomes** Main study outcome: Histological Response in Standardized Scoring of Liver Biopsies and change in ALT level.  
 Dropouts: 22 high dose, 27 low dose, 20 control  
 Available outcomes: cardiac events, deaths (none), adverse events, cancers (weight, BMI, lipids, glucose, HbA1c, HOMA, hsCRP (all reported as medians so not useable in meta-analyses)  
 Response to contact: Yes
- Notes** Data combined for the two intervention groups for binary outcomes and higher dose data used for continuous outcomes.  
 Study funding: supported entirely by Mochida Pharmaceuticals

### Risk of bias table

| Bias                                                      | Authors' judgement | Support for judgement                                                                                                                                                                                                                                                                              |
|-----------------------------------------------------------|--------------------|----------------------------------------------------------------------------------------------------------------------------------------------------------------------------------------------------------------------------------------------------------------------------------------------------|
| Random sequence generation (selection bias)               | Low risk           | Block randomisation using an interactive voice-response system was used to assign subjects in a 1:1:1 ratio between the 2 arms for each site separately. Subjects were stratified by the presence of type 2 diabetes. The total fraction of such individuals was capped at 40% of the study cohort |
| Allocation concealment (selection bias)                   | Low risk           | As above (remote computer-generated randomisation)                                                                                                                                                                                                                                                 |
| Blinding of participants and personnel (performance bias) | Low risk           | Author confirmed researchers and outcome assessors were blinded to treatment allocation and pills were identical with respect to size, colour and gross smell.                                                                                                                                     |
| Blinding of outcome assessment (detection bias)           | Unclear risk       | No details                                                                                                                                                                                                                                                                                         |
| Incomplete outcome data (attrition bias)                  | High risk          | Number and characteristics of participants lost to follow-up similar across arms, however <80% provided outcome data relevant to this systematic review.                                                                                                                                           |
| Selective reporting (reporting bias)                      | Low risk           | Registered Jun 2010, study started June 2010, completed Oct 2012. All outcomes in trials registry entry were also reported in the trials registry. Secondary outcomes reported were not planned (compared with first version of clinicaltrials.gov entry).                                         |
| Attention                                                 | Low risk           | All participants had same follow-up visits.                                                                                                                                                                                                                                                        |
| Compliance                                                | Low risk           | Compliance was estimated by pill count and measuring the ratio of serum EPA to arachidonic acid. compliance rates for the 3 groups (placebo vs EPA-E 1800 mg/d vs EPA-E 2700 mg/d) were 89.5%(6.8%), 90.3%(5.7%) and 89.5%(5.3%) respectively                                                      |
| Other bias                                                | Low risk           | None noted                                                                                                                                                                                                                                                                                         |

### EPOCH 2014 <sup>6 61</sup>

**Methods** Older People, Omega-3 and Cognitive Health (EPOCH)  
 RCT, parallel (n3 EPA+DHA vs MUFA), 18 months  
 Summary risk of bias: Low

**Participants** Healthy older adults with no cognitive impairment.  
 N: 195 int, 196 control (reported by author)  
 Level of risk for CVD: Low  
 Male: NR  
 Mean age (SD): NR  
 Age range: NR, but 65-90 recruited

Smokers: NR  
 Hypertension: NR  
 Medications taken by at least 50% of those in the control group: NR  
 Medications taken by 20-49% of those in the control group: NR  
 Medications taken by some, but less than 20% of the control group: NR  
 Location: Australia  
 Ethnicity: NR

**Interventions** Type: supplement (fish oil capsules)  
 Comparison: high EPA & DHA vs MUFA and low EPA & DHA  
 Intervention: 4 capsules/d (1.72 g/d DHA and 0.60 g/d EPA): EPA+DHA 2.32g/d  
 Control: 4 capsules/d (3.960g/d olive oil and 40 mg/d fish oil)  
 Compliance: count of all unused supplements returned at three-monthly intervals, plus self-report calendars, mailed back on a monthly basis. If compliance fell below 85% (re calendars), they were contacted by a researcher who noted the reasons. Compliance also assessed by erythrocyte membrane n-3 LC PUFA status  
 Length of intervention: 18 months

**Outcomes** Main study outcome: Change in cognitive performance  
 Dropouts: NR  
 Available outcomes: Author reported MI, stroke, revascularisation, arrhythmias, CV events. Planned outcomes, not reported in publications, included: cognitive outcomes, functional outcomes, glucose, BP, lipids, plasma fatty acids, blood pressure, inflammation and oxidative stress.  
 Response to contact: Yes

**Notes** Authors reported some events, but don't appear to be published.  
 Study funding: EPAX donated the Omega-3 concentrate and Blackmores Pty Ltd donated the placebo and packaging of the Omega-3 concentrate. The trial was supported by the Brailsford Robertson Award 2007-2008 (University of Adelaide and CSIRO Food and Nutritional Sciences), and is funded by a National Health and Medical Research Project Grant (#578800).

### Risk of bias table

| Bias                                                      | Authors' judgement | Support for judgement                                                                                                                                                                                                                                                                                                                                                                                                                                                                                                  |
|-----------------------------------------------------------|--------------------|------------------------------------------------------------------------------------------------------------------------------------------------------------------------------------------------------------------------------------------------------------------------------------------------------------------------------------------------------------------------------------------------------------------------------------------------------------------------------------------------------------------------|
| Random sequence generation (selection bias)               | Low risk           | Age-stratified, permuted-block randomisation, with mixed block-sizes (two to eight, size unknown to study investigators), 1:1 allocation. Computer generated randomisation schedule.                                                                                                                                                                                                                                                                                                                                   |
| Allocation concealment (selection bias)                   | Low risk           | An independent researcher prepared allocation to treatment.                                                                                                                                                                                                                                                                                                                                                                                                                                                            |
| Blinding of participants and personnel (performance bias) | Low risk           | The researchers, project staff, and participants remained blinded to treatment allocation until the trial was completed and the database locked. However no information provided on capsules appearance, taste or smell.                                                                                                                                                                                                                                                                                               |
| Blinding of outcome assessment (detection bias)           | Low risk           | As above                                                                                                                                                                                                                                                                                                                                                                                                                                                                                                               |
| Incomplete outcome data (attrition bias)                  | Unclear risk       | No data for each group presented, and no attrition data presented.                                                                                                                                                                                                                                                                                                                                                                                                                                                     |
| Selective reporting (reporting bias)                      | High risk          | Only cognitive functions reported for whole population (not by arm). No secondary outcomes reported (MMSE; perceived health status, depressive symptoms, positive and negative affect, life satisfaction, self-reported cognitive functioning, and functional capacity; blood pressure; biomarkers of glucose, glycated haemoglobin, triglycerides, total cholesterol, HDL, LDL, homocysteine, CRP, MDA, and telomere length). ACTRN2607000278437 Date registered: 18/05/2007. Participant recruitment period unclear. |
| Attention                                                 | Low risk           | All had the same contact and attention                                                                                                                                                                                                                                                                                                                                                                                                                                                                                 |
| Compliance                                                | Unclear risk       | Count of all unused supplements returned at three-monthly intervals, plus self-report calendars, mailed back on a monthly basis. If compliance fell below 85%                                                                                                                                                                                                                                                                                                                                                          |

(re calendars), they were contacted by a researcher who noted the reasons. Compliance also assessed by erythrocyte membrane n-3 LC PUFA status but results not reported

Other bias  None noted

## Fakhrzadeh 2010<sup>62 63</sup>

**Methods** RCT, parallel, (n3 EPA+DHA vs mixed fat MCT), 6 months  
Summary risk of bias: Moderate or high

**Participants** Elderly residents (65 years or over)  
N: 134 in both groups combined. (analysed, int: 62 cont: 62)  
Level of risk for CVD: Low  
Male: 43.5% int., 38.7% control  
Mean age (SD): 74.7 (10.1) int., 74.9 (8.8) control  
Age range: NR  
Smokers: 21.0% int., 14.8% control  
Hypertension: NR  
Medications taken by at least 50% of those in the control group: NR  
Medications taken by 20-49% of those in the control group: NR  
Medications taken by some, but less than 20% of the control group: Statins  
Location: Iran  
Ethnicity: NR

**Interventions** Type: supplement (fish oil capsule vs placebo)  
Comparison: n-3 vs nil  
Intervention: 1g/d fish oil capsule (180mg EPA, 120mg DHA, Zahravi Pharmacy Company, Iran): EPA+DHA 0.3g/d  
Control: 1g/d placebo capsule (medium-chain triglycerides, Zahravi Pharmacy Company, Iran)  
Compliance: Capsule consumption observed by two nurses  
Duration of intervention: 6 months

**Outcomes** Main study outcome: Lipids, insulin resistance  
Dropouts: 10 in both groups combined  
Available outcomes: Lipid profiles, insulin, glucose, HOMA-IR (glucose, insulin and HOMA-IR data not useable- baseline differences)  
Response to contact: Yes

**Notes** Study funding: Tehran University of Medical Science

### Risk of bias table

| Bias                                                      | Authors' judgement                        | Support for judgement                                             |
|-----------------------------------------------------------|-------------------------------------------|-------------------------------------------------------------------|
| Random sequence generation (selection bias)               | <input type="text" value="Unclear risk"/> | "randomly assigned"                                               |
| Allocation concealment (selection bias)                   | <input type="text" value="Unclear risk"/> | As above                                                          |
| Blinding of participants and personnel (performance bias) | <input type="text" value="Unclear risk"/> | "participants and investigators were blinded to the intervention" |
| Blinding of outcome assessment (detection bias)           | <input type="text" value="Unclear risk"/> | As above                                                          |
| Incomplete outcome data (attrition bias)                  | <input type="text" value="Unclear risk"/> | Drop out numbers by group unclear                                 |
| Selective reporting (reporting bias)                      | <input type="text" value="Unclear risk"/> | No registry or protocol identified                                |
| Attention                                                 | <input type="text" value="Unclear risk"/> | Not reported and blinding unclear                                 |
| Compliance                                                | <input type="text" value="Unclear risk"/> | Nurses observed participants taking capsules                      |
| Other bias                                                | <input type="text" value="Low risk"/>     | None noted                                                        |

## Ferrara 2000<sup>21</sup>

**Methods** RCT, crossover, (n6 LA vs MUFA), 6 months  
Summary risk of bias: Moderate or high

**Participants** Hypertensive patients

N: 23 overall (analysed, int: 23 cont: 23)  
 Level of risk for CVD: Moderate  
 Male: 43% int., 43% control.  
 Mean age (SD): NR  
 Age range: 25-70 years  
 Smokers: NR  
 Hypertension: All  
 Medications taken by at least 50% of those in the control group: Antihypertensives  
 Medications taken by 20-49% of those in the control group: (atenolol, nifedipine, lisinopril)  
 Medications taken by some, but less than 20% of the control group: (hydrochlorothiazide, doxazosin)  
 Location: Italy  
 Ethnicity: NR

**Interventions** Type: supplemented food (diets enriched with sunflower oil or olive oil)  
 Comparison: PUFA vs MUFA  
 Intervention: Spoons of sunflower oil added after cooking (40g men, 30g women): assuming 59% LA, 23.6g/d LA men, 17.7g/d women  
 Control: Spoons of olive oil added after cooking (40g men, 30g women)  
**PUFA Dose:** (intended) increase ~20g/d LA, **9%E n-6, 9%E PUFA**  
 Compliance: 7-d food records  
 Duration of intervention: 6 months

**Outcomes** Main study outcome: Antihypertensive use and BP  
 Dropouts: none  
 Available outcomes: BMI, weight, lipids, glucose  
 Response to contact: No contact attempted

**Notes** Study funding: NR

### Risk of bias table

| Bias                                                      | Authors' judgement                        | Support for judgement                                                                                                                                          |
|-----------------------------------------------------------|-------------------------------------------|----------------------------------------------------------------------------------------------------------------------------------------------------------------|
| Random sequence generation (selection bias)               | <input type="text" value=""/>             | "randomly assigned"                                                                                                                                            |
| Allocation concealment (selection bias)                   | <input type="text" value="Unclear risk"/> | "randomly assigned"                                                                                                                                            |
| Blinding of participants and personnel (performance bias) | <input type="text" value="Unclear risk"/> | "double-blind"- however, given as spoonfuls of oil (olive oil and sunflower oil)                                                                               |
| Blinding of outcome assessment (detection bias)           | <input type="text" value="Unclear risk"/> | BP measures by author "unaware of the patient's dietary treatment". Method of blinding not described                                                           |
| Incomplete outcome data (attrition bias)                  | <input type="text" value="Low risk"/>     | No dropouts                                                                                                                                                    |
| Selective reporting (reporting bias)                      | <input type="text" value="Unclear risk"/> | No registry or protocol identified                                                                                                                             |
| Attention                                                 | <input type="text" value="Low risk"/>     | The study only differed by the content of the spoonfuls of oil added to participants diets. Assessment schedule did not appear to differ between the two arms. |
| Compliance                                                | <input type="text" value="Unclear risk"/> | 3 patients not fully compliant, however included in the analysis "since they had complied with the indications for the intake of MUFA or PUFA"                 |
| Other bias                                                | <input type="text" value="Low risk"/>     | None noted                                                                                                                                                     |

### Finnegan 2003 <sup>64</sup>

**Methods** RCT, parallel, 5 arms (n3 EPA+DHA vs n3 ALA vs n6 LA), 6 months  
 Summary risk of bias: Moderate or high

**Participants** People with hyperlipidaemia  
 N: 200 randomised into study (NR by arm), (analysed, high EPA+DHA 31, low EPA+DHA 30, high ALA 29, low ALA 30, cont 30)  
 Level of risk for CVD: moderate  
 Male: high EPA+DHA 58%, low EPA+DHA 57%, high ALA 59%, low ALA 57%, cont 60%  
 Mean age (SD): high EPA+DHA 54(11), low EPA+DHA 53(11), high ALA 54(11), low ALA 52(11), cont 55(11)  
 Age range: NR

Smokers: NR  
 Hypertension: NR  
 Medications taken by at least 50% of those in the control group: NR  
 Medications taken by 20-49% of those in the control group: NR  
 Medications taken by some, but less than 20% of the control group: NR  
 Location: UK  
 Ethnicity: NR

**Interventions** Type: supplement / supplemented food  
 Comparison: high EPA+DHA vs low EPA+DHA vs high ALA vs low ALA 30 vs n6 PUFA  
 Intervention: **high EPA+DHA** 1.7g/d EPA+DHA including 25g of margarine containing 0.5g/d EPA+DHA (Unilever) plus 3 fish oil capsules inc 0.8g/d EPA+DHA (Roche): EPA+DHA 1.7g/d  
**low EPA+DHA** 0.8g/d EPA+DHA including 25g of margarine containing 0.5g/d EPA+DHA (Unilever) plus control capsules (Roche): EPA+DHA 0.8g/d  
**high ALA** 9.5g/d ALA including 25g/d of margarine containing rapeseed & linseed oils plus control capsules (Roche): ALA 9.5g/d  
**low ALA** 4.5g/d ALA including 25g/d margarine containing rapeseed & linseed oils plus control capsules (Roche): ALA 4.5g/d  
**Control:** 25g/d linoleic-acid rich margarine plus control capsules (Roche)  
 Compliance: assessed through return of margarine pots and capsule packs, plus through measurement of plasma phospholipid fatty acid composition, compliance with margarine was >92% across groups, with capsules was >88% across groups and not significantly different between groups  
 Duration of intervention: 6 months

**Outcomes** Main study outcome: fasting and postprandial insulin and glucose  
 Dropouts: NR but 50 were lost across all 5 arms  
 Available outcomes: weight, lipids, glucose, insulin, TNF $\alpha$ , IL-1,2,4,6&10 (postprandial TG and glucose AUC and IAUCs, coagulation and fibrinolytic factors, BP, phagocytic activity, oxidative burst, thymidine and interferon gamma reported but not used)  
 Response to contact: No contact attempted

**Notes** Study funding: DEFRA, BBSRC, Roche Vitamins & Unilever research under the Agri-Food LINK programme

### Risk of bias table

| Bias                                                      | Authors' judgement | Support for judgement                                                                                |
|-----------------------------------------------------------|--------------------|------------------------------------------------------------------------------------------------------|
| Random sequence generation (selection bias)               | Low risk           | Blocked stratified randomisation                                                                     |
| Allocation concealment (selection bias)                   | Unclear risk       | No methods discussed                                                                                 |
| Blinding of participants and personnel (performance bias) | Unclear risk       | Reported as "double blind" but their similarity in appearance, taste and packaging was not discussed |
| Blinding of outcome assessment (detection bias)           | Unclear risk       | As above                                                                                             |
| Incomplete outcome data (attrition bias)                  | High risk          | 25% of participants were lost                                                                        |
| Selective reporting (reporting bias)                      | Unclear risk       | No trials registry entry or protocol found                                                           |
| Attention                                                 | Low risk           | No suggestion of differential attention in the 5 groups                                              |
| Compliance                                                | Low risk           | Statistically significant changes in fatty acids                                                     |
| Other bias                                                | Low risk           | None noted                                                                                           |

### Gill 2012 <sup>65 66</sup>

**Methods** RCT, parallel, (n3 EPA+DHA vs unclear), 24 months  
 Summary risk of bias: Moderate or high

**Participants** Adults with Metabolic syndrome.  
 N: unclear, total randomised 101  
 Level of risk for CVD: Low  
 Male: 47% total, no details by group.  
 Mean age (SD): 55 (10) total  
 Age range: 18-75  
 Smokers: 0% int., 0% control



Hypertension: NR  
 Medications taken by at least 50% of those in the control group: NR  
 Medications taken by 20-49% of those in the control group: NR  
 Medications taken by some, but less than 20% of the control group: NR  
 Location: USA  
 Ethnicity: Unclear

**Interventions** Type: supplement (fish oil capsules)  
 Comparison: EPA & DHA vs placebo (not clear what)  
 Intervention: fO3FA capsules 1.8 g of EPA+DHA daily: EPA+DHA 1.8g/d  
 Control: matching placebo supplement  
 Compliance: NR.  
 Length of intervention: 12 months

**Outcomes** Main study outcome: Change in Carotid IMT  
 Dropouts: Unclear  
 Available outcomes: lipids, insulin and glucose are stated as secondary outcomes but no usable data published  
 Response to contact: No

**Notes** Results cannot be used as numbers are not reported by study arm  
 Study funding: Unclear, but mentions that Pfizer, NIH & "Northwest Lipids Clinic" are partners.

### Risk of bias table

| Bias                                                      | Authors' judgement | Support for judgement                                                                                                                                                                                                                                                                                                |
|-----------------------------------------------------------|--------------------|----------------------------------------------------------------------------------------------------------------------------------------------------------------------------------------------------------------------------------------------------------------------------------------------------------------------|
| Random sequence generation (selection bias)               | Unclear risk       | No details                                                                                                                                                                                                                                                                                                           |
| Allocation concealment (selection bias)                   | Unclear risk       | No details                                                                                                                                                                                                                                                                                                           |
| Blinding of participants and personnel (performance bias) | Unclear risk       | No data                                                                                                                                                                                                                                                                                                              |
| Blinding of outcome assessment (detection bias)           | Unclear risk       | No data                                                                                                                                                                                                                                                                                                              |
| Incomplete outcome data (attrition bias)                  | Unclear risk       | No data                                                                                                                                                                                                                                                                                                              |
| Selective reporting (reporting bias)                      | High risk          | Inadequate detail in reporting as no full text publication found; Gill 2014 does give detail on carotid IMT, but not on other primary or secondary outcomes. The trial was prospectively registered (registered July 2006, unclear when recruitment started, final data collection 2011, first data published 2012). |
| Attention                                                 | Unclear risk       | No data                                                                                                                                                                                                                                                                                                              |
| Compliance                                                | Unclear risk       | No details                                                                                                                                                                                                                                                                                                           |
| Other bias                                                | Unclear risk       | No data                                                                                                                                                                                                                                                                                                              |

### GISSI-P 1999<sup>67 68</sup>

**Methods** Gruppo Italiano per lo Studio della Sopravvivenza nell'Infarto Miocardico - Prevention (GISSI-P)  
 RCT, 2x2 (n3 EPA+DHA vs nil), 42 months  
 Summary risk of bias: Moderate or high

**Participants** People with recent (≤3 months) myocardial infarction  
 N: 5666 int., 5658 control (99.9% follow up at study end)  
 Level of risk for CVD: High  
 Male: 85.7% int., 84.9 % control  
 Mean age (SD): 59.3 (10.6) int., 59.5 (10.5) years control  
 Age range: <50 to >80  
 Smokers: 42.6% int., 42.3% control  
 Hypertension: 36.2% int., 34.9% control  
 Medications taken by at least 50% of those in the control group: anti-platelet  
 Medications taken by 20-49% of those in the control group: ACE inhibitors, beta-blockers  
 Medications taken by some, but less than 20% of the control group: lipid lowering  
 Location: Italy  
 Ethnicity: NR

**Interventions** Type: supplement (capsule)  
 Comparison: EPA & DHA vs nil  
 Intervention: Omacor gelatine capsules, 1/d (850-882 mg/d EPA + DHA daily, ratio 1:2): EPA+DHA 0.86g/d  
 Control: nil (no placebo)  
 Compliance: capsule counts, 11.6% had stopped taking Omacor by 12 months, 28.5% by the end of the study  
 Duration of intervention: median follow up 40 months

**Outcomes** Main study outcome: All-cause mortality, CV mortality, stroke, MI  
 Dropouts: Unclear (however, all randomised were included in analyses)  
 Available outcomes: total, sudden and CV deaths, MI, stroke, angioplasty or CABG, Angina, CHD, diagnosis type 2 diabetes, cancer diagnosis, cancer death, combined CV events, side effects  
 Response to contact: No

**Notes** Numbers are slightly different in different publications (Lancet 1999 paper used as main source). Half of both groups were on vitamin E supplements (300 mg/d synthetic  $\alpha$ -tocopherol) as this was the other 2x2 intervention  
 Study funding: Bristol Meyers Squibb, Pharmacia Upjohn, Societa Prodotti Antibiotici, Pfizer

### Risk of bias table

| Bias                                                      | Authors' judgement | Support for judgement                                                                                                                                    |
|-----------------------------------------------------------|--------------------|----------------------------------------------------------------------------------------------------------------------------------------------------------|
| Random sequence generation (selection bias)               | Low risk           | Telephone/computer network, stratified by hospital, based on a biased coin algorithm                                                                     |
| Allocation concealment (selection bias)                   | Low risk           | Randomisation by telephone with the coordinating centre                                                                                                  |
| Blinding of participants and personnel (performance bias) | High risk          | No placebo intervention (capsule vs nil) so participants not blinded                                                                                     |
| Blinding of outcome assessment (detection bias)           | Low risk           | "validation of clinical events ... was assured by an ad-hoc committee of expert cardiologists and neurologists blinded to patients treatment assignment" |
| Incomplete outcome data (attrition bias)                  | Low risk           | Clearly described, good follow up (<28% dropped out over 3.5 years)                                                                                      |
| Selective reporting (reporting bias)                      | Unclear risk       | No study protocol or trials registry entry was found                                                                                                     |
| Attention                                                 | Low risk           | Slight as no placebo, otherwise similar                                                                                                                  |
| Compliance                                                | Unclear risk       | Capsule counts, 11.6% had stopped taking Omacor by 12 months, 28.5% by the end of the study                                                              |
| Other bias                                                | Low risk           | None noted                                                                                                                                               |

### GLAMT 1993<sup>69</sup>

**Methods** Gamma linolenic acid multicentre trial (GLAMT)  
 RCT, 2 arm, parallel (n-6 GLA vs non-fat), 1 year  
 Summary risk of bias: Moderate or high

**Participants** People with mild diabetic neuropathy  
 CVD risk: moderate  
 Control: randomised 57, analysed 48 (with at least one evaluation)  
 Intervention: randomised 54, analysed 52  
 Mean years in trial: control 1.0, randomised 1.0  
 % male: cont 79%, int 67%  
 Age, mean (SD) years: control 52.9 (11.4), intervention 53.3 (11.1)  
 Age range: unclear  
 Smokers: unclear  
 Hypertension: unclear  
 Medications taken by at least 50% of those in the control group: insulin  
 Medications taken by 20-49% of those in the control group: NR  
 Medications taken by some, but less than 20% of the control group: NR  
 Location: UK & Finland  
 Ethnicity: NR

**Interventions** Type: Supplement  
 Comparison: GLA (n-6) vs placebo (paraffin)

Control aims: 12 capsules/d paraffin  
 Intervention aims: 12 capsules/d evening primrose oil (EP4, equivalent to Epogam): 0.48g/d GLA  
**Dose:** increase 0.48g/d GLA, 0.48g/d or 4kcal or **0.2%E n-6**  
 Baseline n-6: unclear  
 Compliance: unclear  
 Duration of intervention: 1 year

**Outcomes** Main study outcome: measures of diabetic neuropathy  
 Dropouts: cont 17, int 10  
 Available outcomes: MI, cancer (no deaths, glucose and HbA1c appear to have been analysed but are not available)  
 Response to contact: No

**Notes** Study funding: Scotia Pharmaceuticals

### Risk of bias table

| Bias                                                      | Authors' judgement | Support for judgement                                                                                                  |
|-----------------------------------------------------------|--------------------|------------------------------------------------------------------------------------------------------------------------|
| Random sequence generation (selection bias)               | Unclear risk       | Not described                                                                                                          |
| Allocation concealment (selection bias)                   | Unclear risk       | Not described                                                                                                          |
| Blinding of participants and personnel (performance bias) | Low risk           | Described as double blind, and "Active and placebo capsules were indistinguishable in taste or appearance"             |
| Blinding of outcome assessment (detection bias)           | Unclear risk       | Unclear, though study described as double blind no methods or statement of blinding of outcome assessors was mentioned |
| Incomplete outcome data (attrition bias)                  | High risk          | Reasons for withdrawal usually given, but high and dissimilar                                                          |
| Selective reporting (reporting bias)                      | Unclear risk       | No clear protocol or trials registry entry found                                                                       |
| Attention                                                 | Low risk           | Capsule only intervention and provided to all, other follow ups appeared consistent for all                            |
| Compliance                                                | Unclear risk       | NR                                                                                                                     |
| Other bias                                                | Low risk           | None identified                                                                                                        |

### Heine 1989<sup>22</sup>

**Methods** RCT, cross-over, (n6 LA vs mixed fat), 6 months  
 Summary risk of bias: Moderate or high

**Participants** Non-insulin dependent diabetic patients  
 N: 17 patients overall (analysed, int: 14 cont: 14)  
 Level of risk for CVD: Moderate  
 Male: 57% int., 57% control.  
 Mean age (SD): 51.9 (11.6) int., 51.9 (11.6) control  
 Age range: 30-70 years  
 Smokers: NR  
 Hypertension: NR  
 Medications taken by at least 50% of those in the control group: NR  
 Medications taken by 20-49% of those in the control group: Glibenclamide  
 Medications taken by some, but less than 20% of the control group: Gliclazide, tolbutamide  
 Location: The Netherlands  
 Ethnicity: NR

**Interventions** Type: supplemented food (oils and margarines with LA or SFA)  
 Comparison: LA vs SFA  
 Intervention: LA enriched oils and margarines (P:S ratio 1.0): LA quantity unclear  
 Control: Substitution of LA oils and margarines for SFA (P:S ratio 0.3)  
**PUFA Dose:** (intended) increase unclear  
 Compliance: 1-wk dietary recall and assessment of fatty acids of cholesteryl esters  
 Duration of intervention: 30 weeks

**Outcomes** Main study outcome: Lipoproteins and insulin sensitivity  
 Dropouts: 3 overall

Available outcomes: Lipids, glucose, HbA1c, weight, insulin (HDL subfractions as means over the period and BP at 6 months not used)

Response to contact: No contact attempted

**Notes** Study funding: NR

### Risk of bias table

| Bias                                                      | Authors' judgement | Support for judgement                                                                                                                    |
|-----------------------------------------------------------|--------------------|------------------------------------------------------------------------------------------------------------------------------------------|
| Random sequence generation (selection bias)               | Unclear risk       | "randomized"                                                                                                                             |
| Allocation concealment (selection bias)                   | Unclear risk       | "randomized"                                                                                                                             |
| Blinding of participants and personnel (performance bias) | Unclear risk       | NR                                                                                                                                       |
| Blinding of outcome assessment (detection bias)           | Unclear risk       | NR                                                                                                                                       |
| Incomplete outcome data (attrition bias)                  | High risk          | Drop out >20% in 3 months                                                                                                                |
| Selective reporting (reporting bias)                      | Unclear risk       | No registry or protocol identified                                                                                                       |
| Attention                                                 | Low risk           | The study only differed by the content of the oils and margarines. The assessment schedule was not stated to differ between the two arms |
| Compliance                                                | Low risk           | Dietary recall confirmed by significant increase in LA in the intervention group                                                         |
| Other bias                                                | Low risk           | None noted                                                                                                                               |

### HERO-Tapsell 2009 <sup>14 70</sup>

**Methods** Healthy Eating to Reduce Overweight in people with type 2 diabetes (HERO) RCT, parallel, (n3 ALA vs low n3), 12 months  
Summary risk of bias: Moderate or high

**Participants** Overweight adults with non-insulin treated diabetes  
N: 26 int., 24 control. (analysed, int: 18 cont: 17)  
Level of risk for CVD: Moderate  
Male %: NR  
Mean age (SD): 54 (8.7), not reported by arm.  
Age range: 33-70  
Smokers: NR  
Hypertension: NR  
Medications taken by at least 50% of those in the control group: lipid lowering drugs, oral hypoglycaemics  
Medications taken by 20-49% of those in the control group: NR  
Medications taken by some, but less than 20% of the control group: NR  
Location: Australia  
Ethnicity: NR

**Interventions** Type: food supplement (walnuts)  
Comparison: ALA vs nil  
Intervention: 30g/d snack portions of walnuts (provided 10% MUFA, 10% E PUFA, and a P/S ratio of 1.0) and advised not to take fish oil supplements: ALA dose unclear  
Control: No supplements.  
Both groups were given low-fat isocaloric dietary advice (30% E fat (10% E SFA, 15% E MUFA; 5% E PUFA, P/S ratio of 0.5), 20% E protein and 50% E CHO) plus advice to brisk walk 30 min x 3 times/week.  
Compliance: measured by erythrocyte membrane fatty acid levels which were similar in both groups.  
Duration of intervention: 12 months

**Outcomes** Main study outcome: change in body weight and % body fat.  
Dropouts: 8 int., 5 control  
Available outcomes: all-cause mortality (nil deaths), weight, lipids, glucose, insulin, HbA1c and other measures of adiposity.  
Response to contact: No contact attempted

**Notes** Body fat % was too different between groups at baseline hence data not used.

### Risk of bias table

| Bias                                                      | Authors' judgement | Support for judgement                                                                                                                                                                                                                                    |
|-----------------------------------------------------------|--------------------|----------------------------------------------------------------------------------------------------------------------------------------------------------------------------------------------------------------------------------------------------------|
| Random sequence generation (selection bias)               | Low risk           | Randomization was conducted using a computerized random number generator by a researcher independent of the subject interface                                                                                                                            |
| Allocation concealment (selection bias)                   | Unclear risk       | No further details                                                                                                                                                                                                                                       |
| Blinding of participants and personnel (performance bias) | High risk          | "Subjects, but not dietitians, were blinded to the type of overall diet (a pre-packaged 30 g snack portion of walnuts was given to the walnut group unbeknown to the controls)" However, there was no placebo supplement so blinding not truly feasible. |
| Blinding of outcome assessment (detection bias)           | Unclear risk       | Paper states "code was concealed from the researchers collecting data, as well as from subjects." However as participants could not be blinded outcome assessors may not have been (problem for measures of adiposity, not for biochemical measures).    |
| Incomplete outcome data (attrition bias)                  | High risk          | High drop-out rate 35 of 50 analysed (30% attrition rate)                                                                                                                                                                                                |
| Selective reporting (reporting bias)                      | Unclear risk       | Trial registered but post analysis                                                                                                                                                                                                                       |
| Attention                                                 | Low risk           | Both groups appear to have had same level of attention.                                                                                                                                                                                                  |
| Compliance                                                | High risk          | ALA levels almost exactly the same in both intervention and control                                                                                                                                                                                      |
| Other bias                                                | Low risk           | None noted.                                                                                                                                                                                                                                              |

### Houtsmuller 1979 <sup>71-74</sup>

**Methods** RCT, parallel, (increase n6 LA vs usual diet), 72 months maximum  
Summary risk of bias: Moderate or high

**Participants** Adults with newly diagnosed diabetes  
N: 51 int., 51 control. (analysed unclear int, unclear cont)  
Level of risk for CVD: moderate  
Male: 56% overall (not stated by intervention arm)  
Mean age (SD): NR int., NR control  
Age range: NR  
Smokers: NR  
Hypertension: NR  
Medications taken by at least 50% of those in the control group: NR  
Medications taken by 20-49% of those in the control group: NR  
Medications taken by some, but less than 20% of the control group: statins (probably)  
Location: The Netherlands  
Ethnicity: NR

**Interventions** Type: dietary advice  
Comparison: increased PUFA vs usual diet  
Intervention: aims total fat 40%E, 1/3 linoleic acid, CHO 45%E, protein 15%E; methods unclear, surveyed by dietitian. Intervention appears to be delivered by dietitian but no clear details on format or frequency.  
Control: aims SFA 35%E, CHO 50%E, protein 15%E; methods unclear, surveyed by dietitian  
**Compliance by biomarkers: good**, serum total cholesterol significantly reduced in intervention compared to control (-0.47mmol/L, 95% CI -0.76 to -0.18), no significant differences in men, but significant improvements in women from 3 years.  
**Compliance by dietary intake: unclear** (not reported)  
Total fat intake: not reported  
Saturated fat intake: not reported  
PUFA intake: not reported  
PUFA n-3 intake: not reported  
PUFA n-6 intake: not reported  
MUFA intake: not reported

CHO intake: not reported  
 Protein intake: not reported  
 Trans fat intake: not reported  
 Duration of intervention: 72 months

**Outcomes** Main study outcome: progression of diabetic retinopathy  
 Dropouts: unclear int., unclear control  
 Available outcomes: cardiovascular events (total MI and angina), total cholesterol, TGs (data read off graph), CHD mortality (fatal MI), CHD events (MI, angina), progression of retinopathy  
 Response to contact: No

**Notes** Study funding: Dutch Heart Foundation  
 Author contact: Attempted but no contact established

### Risk of bias table

| Bias                                                      | Authors' judgement | Support for judgement                                                                                                                                                                                                                                                     |
|-----------------------------------------------------------|--------------------|---------------------------------------------------------------------------------------------------------------------------------------------------------------------------------------------------------------------------------------------------------------------------|
| Random sequence generation (selection bias)               | Unclear risk       | Participants matched in pairs then randomised                                                                                                                                                                                                                             |
| Allocation concealment (selection bias)                   | Unclear risk       | Randomisation method not clearly described                                                                                                                                                                                                                                |
| Blinding of participants and personnel (performance bias) | Unclear risk       | Unclear, though unlikely as dietary advice provided.                                                                                                                                                                                                                      |
| Blinding of outcome assessment (detection bias)           | Unclear risk       | Blinding of outcome assessors not mentioned.                                                                                                                                                                                                                              |
| Incomplete outcome data (attrition bias)                  | Unclear risk       | Unclear, deaths, cancer and CV events are drop-outs, trialists asked for data - unclear if any data missing                                                                                                                                                               |
| Selective reporting (reporting bias)                      | Unclear risk       | No protocol or trials registry entry found                                                                                                                                                                                                                                |
| Attention                                                 | Unclear risk       | Unclear as methods unclear                                                                                                                                                                                                                                                |
| Compliance                                                | Low risk           | Compliance good assessed by biomarkers (serum total cholesterol)                                                                                                                                                                                                          |
| Other bias                                                | High risk          | Some concerns around fraud in the first authors later research on diet in cancer. No allegations found regarding his research in diabetes (but much information is in Dutch). Numbers of events are not clear by arm and assumed from adding across various publications. |

### IFOMS- Sirtori 1997 <sup>75-77</sup>

**Methods** Italian Fish Oil Multicentre Study (IFOMS)  
 RCT, parallel, (n3 EPA+DHA vs MUFA), 6 months  
 Summary risk of bias: Moderate or high

**Participants** Patients with hypertriglyceridemia  
 N: 470 int., 465 control. (analysed, int: 442 cont: 426)  
 Level of risk for CVD: Moderate  
 Male: 62.6% int., 62.2% control  
 Mean age (SD): 58.2 (9.09) int., 58.8 (8.99) control  
 Age range: NR  
 Smokers: NR  
 Hypertension: 67% int., 68% control  
 Medications taken by at least 50% of those in the control group: Antihypertensives  
 Medications taken by 20-49% of those in the control group: NR  
 Medications taken by some, but less than 20% of the control group: NR  
 Location: Italy  
 Ethnicity: NR

**Interventions** Type: supplement (n-3 or olive oil capsules)  
 Comparison: n-3 vs MUFA  
 Intervention: n-3 capsules (3g/d for 2 months [1.53g EPA and 1.05g DHA], then 2g/d [1.02g EPA and 0.70g DHA] for 4 months, Escapent, Italy): EPA+DHA 1.72g/d  
 Control: Olive oil capsules (3g/d for 2 months, then 2g/d for 4 months)  
**PUFA Dose:** (intended) increase ~2.0g/d EPA+DHA, **0.9%E n-3, 0.9%E PUFA**  
 Compliance: Pill counts and plasma and erythrocyte EPA and DHA

Duration of intervention: 6 months (followed by a 6 month open phase)

**Outcomes** Main study outcome: Lipids and glucose metabolism  
 Dropouts: 28 int., 39 control  
 Available outcomes: Mortality (nil), lipids, glucose, OGTT (area under curve), HbA1c, insulin  
 Response to contact: Yes

**Notes** Study funding: Consiglio delle Ricerche of Italy and by a grant-in-aid by Pharmacia and Upjohn, Milan, Italy

### Risk of bias table

| Bias                                                      | Authors' judgement | Support for judgement                                        |
|-----------------------------------------------------------|--------------------|--------------------------------------------------------------|
| Random sequence generation (selection bias)               | Low risk           | SAS system "randomized-block technique"                      |
| Allocation concealment (selection bias)                   | Unclear risk       | Not detailed                                                 |
| Blinding of participants and personnel (performance bias) | Unclear risk       | Not detailed                                                 |
| Blinding of outcome assessment (detection bias)           | Unclear risk       | Not detailed                                                 |
| Incomplete outcome data (attrition bias)                  | Low risk           | Intention to treat analysis and seemingly balanced drop outs |
| Selective reporting (reporting bias)                      | Unclear risk       | No registry or protocol identified                           |
| Attention                                                 | Unclear risk       | Not detailed and blinding unclear                            |
| Compliance                                                | Unclear risk       | Overall compliance >90% (by pill count)                      |
| Other bias                                                | Low risk           | None noted                                                   |

### JELIS 2007 <sup>78 79</sup>

**Methods** Japan EPA Lipid Intervention Study (JELIS)  
 RCT, parallel, 2arm (n3 EPA vs nil), 5 years  
 Summary risk of bias: Moderate or high

**Participants** People with hypercholesterolaemia  
 N: int., 9326, control 9319 (analysed int 9326, cont 9319)  
 Level of risk for CVD: Moderate (Patients with hypercholesterolaemia)  
 Male: 32% int., 31% control  
 Mean age (SD): 61 (8) int. 61 (9) control  
 Age range: 40-75 years  
 Smokers: 20% int., 18% control  
 Hypertension: 36% int., 35% control  
 Medications taken by at least 50% of those in the control group: statins  
 Medications taken by 20-49% of those in the control group: Calcium channel blockers, other antihypertensives  
 Medications taken by some, but less than 20% of the control group: beta blockers, antiplatelet, hypoglycaemics, nitrates  
 Location: Japan  
 Ethnicity: Japanese

**Interventions** Type: supplement (EPA capsule)  
 Comparison 1: EPA vs nil  
 Intervention: 3 x 2 x 300mg capsules/d EPA ethyl ester (total dose of 1.8g/d EPA), after meals: EPA 1.8g/d  
 Control: Nothing (though all in both groups received "appropriate" dietary advice). All patients in both groups were on statins.  
 Compliance: Monitored by local physicians and measuring plasma fatty acids concentrations. Study drug regimens, 71% adhered EPA int., 73% adhered EPA control, 74% adhered statin.  
 Duration of intervention: maximum 5 years, mean 4.7 (1.1) years.

**Outcomes** Main study outcome: major coronary events  
 Dropouts: 1766 int., 1582 control (but all had endpoint evaluation)  
 Available outcomes: Major coronary events: sudden cardiac death, fatal or non-fatal MI, unstable angina, angioplasty or CABG. Also all-cause mortality, stroke, peripheral artery disease, cancer, lipids, rise in blood sugar, fasting glucose, HbA1c.

Response to contact: No

**Notes** Study funding: Mochida Pharmaceutical Company

### Risk of bias table

| Bias                                                      | Authors' judgement | Support for judgement                                                                                                                                                                                                                                                                                    |
|-----------------------------------------------------------|--------------------|----------------------------------------------------------------------------------------------------------------------------------------------------------------------------------------------------------------------------------------------------------------------------------------------------------|
| Random sequence generation (selection bias)               | Low risk           | Statistical Co-ordination centre: "permitted block randomisation with a block size of 4"                                                                                                                                                                                                                 |
| Allocation concealment (selection bias)                   | Low risk           | Centralised. Statistical coordinating centre (see above).                                                                                                                                                                                                                                                |
| Blinding of participants and personnel (performance bias) | High risk          | Not blinded as there was no placebo, "Open label blinded end point"                                                                                                                                                                                                                                      |
| Blinding of outcome assessment (detection bias)           | Low risk           | "Clinical endpoints ... reported by local physicians were checked by members of a regional organizing committee in a blinded fashion. Then an endpoints adjudication committee ... confirmed them once a year without knowledge of the treatment allocation".                                            |
| Incomplete outcome data (attrition bias)                  | Low risk           | Well documented, ITT analysis, drop out numbers low.                                                                                                                                                                                                                                                     |
| Selective reporting (reporting bias)                      | Unclear risk       | NCT00231738 registered October 2005, recruitment Nov 1996 to Nov 1999, main results published 2007. Rationale & design paper published in 2003 (reported baseline characteristics, so before completed follow up, but after data collection began). All reported outcomes appear to have been published. |
| Attention                                                 | Low risk           | Slight, as no placebo provided to control group, but only capsules to intervention group. Otherwise two groups appeared to be treated equally.                                                                                                                                                           |
| Compliance                                                | Unclear risk       | Monitored by local physicians and measuring plasma fatty acids concentrations. Study drug regimens, 71% adhered EPA int., 73% adhered EPA control, 74% adhered statin.                                                                                                                                   |
| Other bias                                                | Low risk           | None noted                                                                                                                                                                                                                                                                                               |

### Krebs 2006<sup>80</sup>

**Methods** RCT, parallel, (n3 EPA+DHA vs n6 LA, both with weight loss programme), 6 months  
Summary risk of bias: Moderate or high

**Participants** Overweight hyperinsulinaemic women  
N: 39 int., 38 control. (analysed, int: 35 cont: 32)  
Level of risk for CVD: Moderate  
Male: 0% int., 0% control.  
Mean age (SD): 44.7 (13.2) in both groups combined  
Age range: 21-69 years  
Smokers: 0 (smokers were excluded)  
Hypertension: NR  
Medications taken by at least 50% of those in the control group: NR  
Medications taken by 20-49% of those in the control group: NR  
Medications taken by some, but less than 20% of the control group: NR  
Location: UK  
Ethnicity: NR

**Interventions** Type: supplement (capsules with n3 EPA+DHA or LA+oleic acid)  
Comparison: n3 EPA+DHA vs n6 LA, both with weight loss programme  
Intervention: Weight loss programme plus 5 capsules/d (including 1.3g EPA+ 2.9g DHA, EPAX, Pronova): EPA+DHA 4.2g/d  
Control: Weight loss programme plus 5 capsules/d (including 2.8g LA + 1.4g oleic acid, Pronova): LA 2.8g/d  
Compliance: Plasma and adipose fatty acids  
Duration of intervention: 6 months

**Outcomes** Main study outcome: Cardiovascular risk factors  
Dropouts: 4 int., 6 control  
Available outcomes: Adiposity, insulin, glucose, HOMA, HbA1c, lipids, inflammatory markers (BP 6



months not used). All as geometric means. Change data for weight, fat mass, waist circumference, triglycerides, AUC insulin

Response to contact: No contact attempted

**Notes** 3 arm study, with the no weight-loss arm not discussed here  
Study funding: Medical Research Council and SMILES

### Risk of bias table

| Bias                                                      | Authors' judgement | Support for judgement                                                                           |
|-----------------------------------------------------------|--------------------|-------------------------------------------------------------------------------------------------|
| Random sequence generation (selection bias)               | Unclear risk       | "randomly assigned"                                                                             |
| Allocation concealment (selection bias)                   | Unclear risk       | "randomly assigned"                                                                             |
| Blinding of participants and personnel (performance bias) | Unclear risk       | "double blind"                                                                                  |
| Blinding of outcome assessment (detection bias)           | Unclear risk       | "double blind"                                                                                  |
| Incomplete outcome data (attrition bias)                  | High risk          | >10% lost over 6 months                                                                         |
| Selective reporting (reporting bias)                      | Unclear risk       | No registry or protocol identified                                                              |
| Attention                                                 | Low risk           | For the arms discussed here, schedules appeared comparable and only differed by capsule content |
| Compliance                                                | Low risk           | Significant increase in n-3 and DHA in adipose tissue of intervention group                     |
| Other bias                                                | Low risk           | None noted                                                                                      |

### Lalia 2015<sup>81</sup>

**Methods** RCT, parallel, (n3 EPA+DHA vs MUFA), 6 months  
Summary risk of bias: Moderate or high

**Participants** Insulin resistant adults  
N: 16 int., 15 control. (analysed, int: 14 cont: 11)  
Level of risk for CVD: low  
Male: 36% int., 18% control.  
Mean age (SD): 35.3 (2.9) int., 32.6 (2.5) control  
Age range: NR (recruitment criterion was ≥18 years)  
Smokers: 0% (exclusion criterion)  
Hypertension: NR  
Medications taken by at least 50% of those in the control group: NR  
Medications taken by 20-49% of those in the control group: NR  
Medications taken by some, but less than 20% of the control group: NR  
(Those taking medications that might affect muscle metabolism, such as beta-blockers, corticosteroids, anticoagulants were excluded)  
Location: USA  
Ethnicity: NR

**Interventions** Type: supplement  
Comparison: EPA+DHA vs ethyl oleate  
Intervention: EPA+DHA as 2x2 softgel capsules/d (2.7g/d EPA+ 1.2g/d DHA): EPA+DHA 3.9g/d  
Control: ethyl oleate as 2x2 softgel capsules/d (4.8g/d ethyl oleate)  
**PUFA Dose:** (intended) increase 3.9g/d EPA+DHA, **1.8%E n-3, 1.8%E PUFA**  
Compliance: plasma EPA and DHA assessed, both levels were higher in the intervention group at 6 months (p values between 0.05 and 0.10).  
Duration of intervention: 6 months

**Outcomes** Main study outcome: hepatic and peripheral insulin sensitivity  
Dropouts: 2 of 16 int., 4 of 15 control  
Available outcomes: BMI, glucose, insulin, HOMA-IR (weight, lipids, CRP, IL-6 too different at baseline to use, leptin & adiponectin reported but not used)  
Response to contact: No contact attempted

**Notes** Study funding: Clinical and translational science award, Strickland Career Development Award, Sancilio & Co supplied materials for the study, senior author was member of the Sancilio Scientific Advisory Board.

## Risk of bias table

| Bias                                                      | Authors' judgement | Support for judgement                                                                                                                                          |
|-----------------------------------------------------------|--------------------|----------------------------------------------------------------------------------------------------------------------------------------------------------------|
| Random sequence generation (selection bias)               | Low risk           | "randomly assigned individuals to groups based on a table prepared by a statistician"                                                                          |
| Allocation concealment (selection bias)                   | Unclear risk       | Not described                                                                                                                                                  |
| Blinding of participants and personnel (performance bias) | Unclear risk       | Reported as "double blind" but no further details of how this was attained or whether it was successful provided.                                              |
| Blinding of outcome assessment (detection bias)           | Unclear risk       | Not described                                                                                                                                                  |
| Incomplete outcome data (attrition bias)                  | High risk          | 31 randomised, 25 completed so 20% dropout over 6 months. Further 4 participants missed out on several measures.                                               |
| Selective reporting (reporting bias)                      | Low risk           | All outcomes reported in trials register were reported in the paper or on the registry site. Study registered in Sept 2012, data collection began in Dec 2012. |
| Attention                                                 | Low risk           | Appeared similar in both arms                                                                                                                                  |
| Compliance                                                | High risk          | Difference in lipid composition between arms was not statistically significant                                                                                 |
| Other bias                                                | Low risk           | None noted                                                                                                                                                     |

## Martinez 2014 <sup>82</sup>

**Methods** RCT, parallel, (n3 EPA+DHA vs unclear), 12 months  
Summary risk of bias: Moderate or high

**Participants** People treated for chronic periodontitis  
N: 7 int., 8 control. (analysed, int: 7 cont: 8)  
Level of risk for CVD: low  
Male: 43% int., 38% control.  
Mean age (SD) years: 43.1 (6.0) int., 46.1 (11.6) control  
Age range: NR  
Smokers: 0% int., 13% control  
Hypertension: NR  
Medications taken by at least 50% of those in the control group: NR  
Medications taken by 20-49% of those in the control group: NR  
Medications taken by some, but less than 20% of the control group: NR  
Location: Brazil  
Ethnicity: non-white 4 of 7 (57%) int, 2 of 8 (25%) placebo, others white

**Interventions** Type: supplement  
Comparison: EPA+DHA vs "placebo"  
Intervention: 3 capsules/d EPA+DHA (Quintaessencia, 0.18g/d EPA, 0.12g/d DHA): EPA+DHA 0.9g/d  
Control: 3 capsules/d "placebo" - not defined (Quintaessencia)  
Compliance: assessed by return of empty capsule containers and weekly discussion about intake, difference between intervention and control at 12 months was statistically significant for EPA but not DHA or DPA.  
Duration of intervention: 12 months

**Outcomes** Main study outcome: serum fatty acids  
Dropouts: 0 int., 0 control  
Available outcomes: periodontal outcomes (probing depth, clinical attachment levels, visible plaque index, bleeding on probing), lipids, hsCRP, leucocytes, HbA1c, Insulin, glucose (all reported as medians, so not useable in meta-analyses).  
Response to contact: No contact attempted

**Notes** Study funding: Not reported  
Author contact: Not yet

## Risk of bias table

| Bias | Authors' judgement | Support for judgement |
|------|--------------------|-----------------------|
|------|--------------------|-----------------------|

|                                                           |              |                                                                                                                                                                                     |
|-----------------------------------------------------------|--------------|-------------------------------------------------------------------------------------------------------------------------------------------------------------------------------------|
| Random sequence generation (selection bias)               | Low risk     | "randomly assigned using a coin toss"                                                                                                                                               |
| Allocation concealment (selection bias)                   | Unclear risk | No further detail                                                                                                                                                                   |
| Blinding of participants and personnel (performance bias) | Unclear risk | Unclear how similar intervention and control were                                                                                                                                   |
| Blinding of outcome assessment (detection bias)           | Low risk     | Probable as paper states "bottles were not decoded until all of the follow up evaluations and statistical analyses had been performed to ensure proper double-blind study protocol" |
| Incomplete outcome data (attrition bias)                  | Low risk     | No participants were lost                                                                                                                                                           |
| Selective reporting (reporting bias)                      | Unclear risk | No protocol or trials register entry found                                                                                                                                          |
| Attention                                                 | Low risk     | Capsules provided monthly, discussion about intake weekly, dental follow up every 4 months                                                                                          |
| Compliance                                                | Unclear risk | Only EPA but not DHA or DPA was significantly different at 12 months (due to small sample size?)                                                                                    |
| Other bias                                                | Low risk     | None noted                                                                                                                                                                          |

## MENU - Rock 2016<sup>83 84</sup>

**Methods** Metabolism, Exercise and Nutrition at UCSD (MENU)

RCT, parallel, (n3 ALA vs nil), 12 months

Summary risk of bias: Moderate or high

**Participants** Overweight and obese women, of whom half were insulin resistant

N: 82 int., 81 control. (analysed, int: 65 cont: 61)

Level of risk for CVD: low

Male: 0% int., 0% control.

Mean age (SD) years: 51 (NR) int., 50 (NR) control

Age range: 22-67 years int, 25-72 cont

Smokers: NR

Hypertension: NR

Medications taken by at least 50% of those in the control group: NR

Medications taken by 20-49% of those in the control group: NR

Medications taken by some, but less than 20% of the control group: 10% were on cholesterol medications

Location: USA

Ethnicity: Hispanic 18% int, 14% cont; black 9% int, 3% cont; Asian American 1% int, 4% cont; white non-Hispanic 71% int, 78% cont.

**Interventions** Type: food & advice

Comparison: walnut rich moderate fat diet (ALA) vs moderate fat diet (MUFA)

Intervention: advice to follow walnut-rich higher fat diet (35%E fat with limited SFA, MUFA encouraged, including 42g/d walnuts (provided by study), 45%E CHO, 20%E protein). Participants given print materials on diet & exercise, attended group sessions weekly for 1st 4 months, biweekly for next 2 months, then monthly to 1 year), provided web-based tracking for dietary constituents, scale, pedometer, measuring cups and exercise videos. Regular dietetic and group leader support. Clinic visits were at 0, 6 and 12 months: ALA dose unclear

Control: Exactly as intervention for goals, materials and support except higher fat diet did not include walnuts (35%E fat with limited SFA, MUFA encouraged, 45%E CHO, 20%E protein)

Compliance: Walnut consumption reported on form and nuts provided. Red blood cell ALA significantly higher in int at 12 months than control.

Duration of intervention: 12 months

**Outcomes** Main study outcome: body weight

Dropouts: 13 of 82 int., 12 of 81 control

Available outcomes: weight, waist circumference, HDL and LDL cholesterol, triglycerides, insulin, glucose, HOMA-IR, HOMA-beta, CRP and IL-6 (estradiol, SHBG, nutrient gene interactions, physical activity and heart rate also presented)

Response to contact: No

**Notes** Study funding: National Cancer Inst and California Walnut Commission

Author contact: Not yet

### Risk of bias table

| Bias                                                      | Authors' judgement | Support for judgement                                                                                                   |
|-----------------------------------------------------------|--------------------|-------------------------------------------------------------------------------------------------------------------------|
| Random sequence generation (selection bias)               | Low risk           | Randomisation stratified by age and insulin resistance                                                                  |
| Allocation concealment (selection bias)                   | Unclear risk       | No details                                                                                                              |
| Blinding of participants and personnel (performance bias) | High risk          | Open study, participants were advised on their diets extensively                                                        |
| Blinding of outcome assessment (detection bias)           | Unclear risk       | Blinding not mentioned, so unclear for their primary outcome, weight.                                                   |
| Incomplete outcome data (attrition bias)                  | Low risk           | Paper states ITT analysis but 25 dropouts (15%) not included in 1 year data, but dropout reasons clear.                 |
| Selective reporting (reporting bias)                      | Low risk           | Pre-registered, all mentioned outcomes reported at 12 months.                                                           |
| Attention                                                 | Low risk           | Appear very equal.                                                                                                      |
| Compliance                                                | Low risk           | Statistically significant difference between intervention and control arms for ALA in blood cell membranes at 12 months |
| Other bias                                                | Low risk           | None noted                                                                                                              |

## Mita 2007<sup>85</sup>

**Methods** RCT, parallel, (n3 EPA vs nil), 2 years  
Summary risk of bias: Moderate or high

**Participants** Japanese type 2 diabetics  
N: Int. 40, cont: 41 (analysed 30, 30).  
Level of risk for CVD: Moderate  
Male: 53% int., 67% control.  
Mean age (SD): 59 (11.2) int. 61.2 (8.4) control  
Age range: NR  
Smokers: 40% int., 43% control  
Hypertension: NR  
Medications taken by at least 50% of those in the control group: Oral hypoglycaemics  
Medications taken by 20-49% of those in the control group: Insulin, lipid lowering drugs, antihypertensives.  
Medications taken by some, but less than 20% of the control group: Anti-thrombotics  
Location: Japan  
Ethnicity: 100% Japanese

**Interventions** Type: supplement (EPA oil capsules)  
Comparison: EPA vs nil  
Intervention: 1800mg/d EPA EPADEL capsules (Mochida Pharmaceutical Co Ltd Japan)- 98% pure ethyl-ester EPA (unclear how many caps): EPA+DHA 1.8g/d  
Control: no intervention  
Compliance: Checked during 3 month reviews throughout trial and 5 participants were excluded for poor compliance but no details on method or results.  
Length of intervention: mean 2.1 (0.2) years

**Outcomes** Main study outcome: Progression of diabetic macroangiopathy measured by carotid intima-media thickness and brachial-ankle pulse wave velocity.  
Dropouts: 10 int., 11 control  
Available outcomes: BMI, lipids, BP, HbA1c, cancer diagnosis.  
Response to contact: No contact attempted

**Notes** Blood pressure data not used as groups are different at baseline.  
Study funding: Not stated

### Risk of bias table

| Bias                                        | Authors' judgement | Support for judgement                                                |
|---------------------------------------------|--------------------|----------------------------------------------------------------------|
| Random sequence generation (selection bias) | Low risk           | Patients randomly divided into two groups matched for age and gender |
| Allocation concealment (selection bias)     | Unclear risk       | No details                                                           |

|                                                           |              |                                                                                                                                                   |
|-----------------------------------------------------------|--------------|---------------------------------------------------------------------------------------------------------------------------------------------------|
| Blinding of participants and personnel (performance bias) | High risk    | Open label                                                                                                                                        |
| Blinding of outcome assessment (detection bias)           | Low risk     | Assessors of main study outcomes were blinded to the treatment                                                                                    |
| Incomplete outcome data (attrition bias)                  | Low risk     | Drop out (26%) over 2 years. All dropouts explained, however, 5 were excluded for poor compliance but no clear predefined protocol for exclusion. |
| Selective reporting (reporting bias)                      | Unclear risk | No protocol                                                                                                                                       |
| Attention                                                 | Low risk     | All participants had the same contact                                                                                                             |
| Compliance                                                | Unclear risk | Compliance measured but no clear methods or reported results.                                                                                     |
| Other bias                                                | Low risk     | None noted                                                                                                                                        |

## Moore 2006 <sup>24</sup>

**Methods** RCT, 5 arms in parallel, (high LCn3 & high ALA vs high LCn3 & n6 vs low LCn3 & high ALA vs low LCn3 & n6, also a control arm), 6 months  
Summary risk of bias: moderate to high

**Participants** Overweight or obese adults  
N: high LCn3 & high ALA 32 (analysed 29), high LCn3 & n6 32 (analysed 27), low LCn3 & high ALA 30 (analysed 22), low LCn3 & n6 29 (analysed 27)  
Level of risk for CVD: moderate  
Men: 33% overall  
Mean age in years (SD): 50 (9) overall  
Age range: not reported  
Smokers: NR  
Hypertension: NR  
Medications taken by at least 50% of those in the control group: NR  
Medications taken by 20%-49% of those in the control group: NR  
Medications taken by some, but less than 20% of the control group: NR  
Location: UK  
Ethnicity: NR

**Interventions** Type: food - oily or white fish plus fat spreads and cooking oils  
Comparison: high LCn3 & high ALA vs high LCn3 & n6 vs low LCn3 & high ALA vs low LCn3 & n6, also a control arm  
Intervention: study foods were collected from trial every 4 weeks  
high LCn3 & high ALA: 2 portions oily fish/wk or 4.5g/wk LCn3, rapeseed oil for oils and fats  
high LCn3 & n6: 2 portions oily fish/wk or 4.5g/wk LCn3, sunflower oil for oils and fats  
low LCn3 & high ALA: 2 portions white fish/wk or 0.7g/wk LCn3, rapeseed oil for oils and fats  
low LCn3 & n6: 2 portions white fish/wk or 0.7g/wk LCn3, sunflower oil for oils and fats  
Control: no intervention  
Compliance: assessed by food diary and by plasma fatty acids - suggesting good compliance  
Length of intervention: 24 weeks

**Outcomes** Main study outcome: cardiovascular risk factors  
Dropouts: 2, 5, 7, 3 dropped out  
Available outcomes: adiposity (weight, waist, DXA%), lipids, BP, inflammatory markers (plasma cytokines, leptin, acute phase proteins, TNF alpha, ACT reported but not in enough detail to include in meta-analysis), insulin sensitivity (glucose and insulin, but only states "no significant group x time interactions").  
Response to contact: not yet attempted

**Notes** Study funding: not stated but Matthew foods provided fat spreads

### Risk of bias table

| Bias                                        | Authors' judgement | Support for judgement                                                        |
|---------------------------------------------|--------------------|------------------------------------------------------------------------------|
| Random sequence generation (selection bias) | Low risk           | minimisation was used to assign participants and ensure groups were balanced |

|                                                           |              |                                                   |
|-----------------------------------------------------------|--------------|---------------------------------------------------|
| Allocation concealment (selection bias)                   | Unclear risk | unclear                                           |
| Blinding of participants and personnel (performance bias) | High risk    | Not blinded as foods were used                    |
| Blinding of outcome assessment (detection bias)           | Unclear risk | Unclear                                           |
| Incomplete outcome data (attrition bias)                  | Low risk     | Clearly described                                 |
| Selective reporting (reporting bias)                      | Unclear risk | No trials registry or protocol found              |
| Attention                                                 | Low risk     | Food interventions so equivalent attention likely |
| Compliance                                                | Low risk     | Good changes in plasma fatty acids                |
| Other bias                                                | Low risk     | None noted                                        |

## MUFFIN Miller 2016 <sup>18</sup>

**Methods** RCT, prospective, open label, parallel group (n6 LA vs MUFA), 6 months  
Summary risk of bias: Moderate or high

**Participants** Middle-aged men and women with metabolic syndrome  
N: total randomised: 88 (analysed: int: 16; cont: 23)  
Level of risk for CVD: Moderate  
Male: 40% of all participants; NR by group.  
Mean age (SD): 60.9 (8.5) for all participants; NR by group  
Age range: 38-76 (all participants)  
Smokers: NR  
Hypertension: NR  
Medications taken by at least 50% of those in the control group: NR  
Medications taken by 20-49% of those in the control group: statins, ACE inhibitors  
Medications taken by some, but less than 20% of the control group: NR  
Location: USA  
Ethnicity: 79% of total participants were African-American

**Interventions** Type: food supplement (PUFA enriched muffins with safflower oil or MUFA enriched with high oleic acid sunflower oil)  
Comparison: PUFA vs MUFA  
Intervention: 3x 3.5oz PUFA enriched muffins per day (including 27.6g/d PUFA; prepared in the metabolic kitchen of the USDA [Beltsville, MD]): PUFA 27.6g/d  
Control: 3x 3.5oz MUFA enriched muffins per day (including 30.9g/d MUFA; prepared in the metabolic kitchen of the USDA [Beltsville, MD])  
**PUFA Dose:** (intended) increase 27.6g/d LA, **12.4%E n-3, 12.4%E PUFA**  
Compliance: 7-day food records at baseline and at end of 6m testing, including number of muffins consumed.  
Duration of intervention: 6 months

**Outcomes** Main study outcome: Cardiometabolic benefit  
Dropouts: 49 in total (n=88/110 randomised post AHA dietary baseline phase; n=39 completed 6-month dietary intervention)  
Available outcomes: Adiposity, insulin, lipids, Inflammatory markers: hs-CRP, IL-8, TNF $\alpha$  (glucose and HOMA reported but not used due to baseline differences; BP 6 months, not used)  
Response to contact: No contact attempted

**Notes** Supported by the Baltimore VA Geriatric Research Education and Clinical Center and Nutrition Obesity Research Center. No conflicts of interest declared

### Risk of bias table

| Bias                                        | Authors' judgement | Support for judgement                                   |
|---------------------------------------------|--------------------|---------------------------------------------------------|
| Random sequence generation (selection bias) | Unclear risk       | Randomisation stated but no method                      |
| Allocation concealment (selection bias)     | Unclear risk       | No information provided                                 |
| Blinding of participants and personnel      | Unclear risk       | Taste blinded for participants but no information about |

|                                                 |              |                                                                                                              |
|-------------------------------------------------|--------------|--------------------------------------------------------------------------------------------------------------|
| (performance bias)                              |              | personnel blinding                                                                                           |
| Blinding of outcome assessment (detection bias) | Unclear risk | No detail provided for relevant outcomes                                                                     |
| Incomplete outcome data (attrition bias)        | High risk    | Primary outcomes reported only for participants who completed the trial (39/88)                              |
| Selective reporting (reporting bias)            | Unclear risk | No study registration or protocol was found                                                                  |
| Attention                                       | Low risk     | Follow up appeared identical                                                                                 |
| Compliance                                      | Unclear risk | No data provided regarding muffin compliance over trial; FA status data provided for 34/88 participants only |
| Other bias                                      | Low risk     | None noted                                                                                                   |

## Nigam 2014 <sup>86</sup>

**Methods** RCT, parallel, (n3 ALA vs n6 LA vs MUFA), 6 months  
Summary risk of bias: Moderate or high

**Participants** People with non-alcoholic fatty liver disease  
N: 30 n6 int., 33 ALA int, 30 MUFA control. (analysed 30 n6 int., 30 ALA int, 30 MUFA control)  
Level of risk for CVD: moderate  
Male: 100% n6 int., 100% ALA int, 100% MUFA control  
Mean age (SD): 36.2 (7.1) n6 int., 38.0 (6.4) ALA int, 37.2 (6.2) MUFA control  
Age range: NR but 20-50years were the inclusion criteria  
Smokers: NR  
Hypertension: NR  
Medications taken by at least 50% of those in the control group: NR  
Medications taken by 20-49% of those in the control group: NR  
Medications taken by some, but less than 20% of the control group: NR  
Location: India  
Ethnicity: Asian Indians

**Interventions** Type: food  
Comparisons: n6 vs MUFA, also ALA vs MUFA, also ALA vs n6  
n6 Intervention: to use up to 20g/d of soybean or safflower oil for cooking (15-24% MUFA, 50-60% PUFA, n6/n3 7 for soya or >100 for safflower)  
ALA Intervention: to use up to 20g/d of canola oil for cooking (61% MUFA, 7% SFA, 21% n6 PUFA, 11% ALA): ALA 2.2g/d  
Control: to use up to 20g/d of olive oil for cooking (70% MUFA, 15% SFA, 9% n6 PUFA, 1% ALA)  
Dietary counselling was given to all participants.  
**PUFA Dose:** unclear  
Compliance: Assessed using FFQ, 24 hour recall and 3 day food diary (unclear how many or how often). Paper states that 1 person was excluded from the canola group for non-compliance but this was not defined. No further compliance details.  
Duration of intervention: 6 months

**Outcomes** Main study outcome: blood glucose control  
Dropouts: 0 of 30 n6 int., 3 of 33 ALA int, 0 of 30 MUFA control  
Available outcomes: glucose, insulin, HOMA, serum triglycerides, adiposity, (also disposition index, liver span, LFTs provided but not used)  
Response to contact: No contact attempted

**Notes** Study funding: Dalmin Continental  
Comparisons used: ALA vs MUFA for the effect n3, N6 vs MUFA for the effect of N6, ALA vs LA for n3 vs n6 comparison.

### Risk of bias table

| Bias                                                      | Authors' judgement | Support for judgement                                          |
|-----------------------------------------------------------|--------------------|----------------------------------------------------------------|
| Random sequence generation (selection bias)               | Low risk           | Paper states "randomly allocated by computer-generated number" |
| Allocation concealment (selection bias)                   | Unclear risk       | No details                                                     |
| Blinding of participants and personnel (performance bias) | High risk          | Appears to be an open study without blinding                   |

|                                                 |              |                                                                                                                               |
|-------------------------------------------------|--------------|-------------------------------------------------------------------------------------------------------------------------------|
| Blinding of outcome assessment (detection bias) | High risk    | Open label, no further details                                                                                                |
| Incomplete outcome data (attrition bias)        | Low risk     | 3 of 93 dropped out (3%), reasons given                                                                                       |
| Selective reporting (reporting bias)            | Unclear risk | No protocol or trial register entry found                                                                                     |
| Attention                                       | Low risk     | The study only differed by the content of the oils, but the assessment schedule was not stated to differ between the two arms |
| Compliance                                      | Unclear risk | Not reported                                                                                                                  |
| Other bias                                      | Low risk     | None noted                                                                                                                    |

## Niki 2016 <sup>87</sup>

**Methods** RCT, parallel, (n3 EPA vs nil (both with strong statin)), 6 months  
Summary risk of bias: Moderate or high

**Participants** Patients with angina and hypertension treated with strong statins  
N: 48 int., 47 control, but only 62 received treatment (?) (analysed, int: 29 cont: 30)  
Level of risk for CVD: high  
Male: 72% int., 63% control.  
Mean age (SD): 68.1 (10.1) int., 69.4 (10.7) control  
Age range: NR  
Smokers: 0% both arms  
Hypertension: 100% both arms  
Medications taken by at least 50% of those in the control group: statins, aspirin (100%), thienopyridine (anti-platelet, 100%)  
Medications taken by 20-49% of those in the control group: ACE inhibitors 23%, Angiotensin II receptor blocker 37%, calcium channel blocker 43%, beta-blockers 30%  
Medications taken by some, but less than 20% of the control group: NR  
Location: Japan  
Ethnicity: NR

**Interventions** Type: supplement  
Comparison: EPA ester vs nil  
Intervention: 1.8g/d EPA ester (brand and form unclear): EPA 1.8g/d  
Control: nil  
**PUFA Dose:** (intended) increase 1.8g/d EPA, **0.8%E n-3, 0.8%E PUFA**  
Compliance: NR  
Duration of intervention: 6 months

**Outcomes** Main study outcome: inflammatory cytokines  
Dropouts: 2 int., 1 control  
Available outcomes: HDL and LDL cholesterol, glucose, HbA1c, hs-CRP, TNF alpha, IL-6 (no deaths, MI or revascularisation occurred in either arm, TG reported but too different at baseline, PTX3, MMP-3, MMP-9, MCP-1, BP, lumen, plaque & lipid volume reported but not used)  
Response to contact: No contact attempted

**Notes** Study funding: NR, senior author received lecture fees from 3 pharmaceutical companies

### Risk of bias table

| Bias                                                      | Authors' judgement | Support for judgement                                                                                                    |
|-----------------------------------------------------------|--------------------|--------------------------------------------------------------------------------------------------------------------------|
| Random sequence generation (selection bias)               | Low risk           | "allocated to 2 groups using computer assisted permuted-block randomization with random block size of 4-6"               |
| Allocation concealment (selection bias)                   | Unclear risk       | Not reported                                                                                                             |
| Blinding of participants and personnel (performance bias) | High risk          | Open label (no placebo)                                                                                                  |
| Blinding of outcome assessment (detection bias)           | Unclear risk       | Unclear, assessors blinded to clinical characteristics, but unclear if blinded to allocation                             |
| Incomplete outcome data (attrition bias)                  | High risk          | While 95 were allocated only 62 were treated (unclear what this means in terms of control group who received no placebo) |



|                                      |              |                                                                        |
|--------------------------------------|--------------|------------------------------------------------------------------------|
| Selective reporting (reporting bias) | Unclear risk | No protocol or trials registry entry located                           |
| Attention                            | Low risk     | There appear to have been similar numbers and duration of appointments |
| Compliance                           | Unclear risk | Not reported                                                           |
| Other bias                           | Low risk     | None noted                                                             |

## Nodari 2011 HF<sup>88</sup>

**Methods** RCT, parallel, (n3 DHA+EPA vs MUFA), 12 months  
Summary risk of bias: Moderate or high

**Participants** People with heart failure (non-ischaemic dilated cardiomyopathy)

N: 67 int., 66 control. (analysed, int: 67 cont: 66)

Level of risk for CVD: high

Male: 95.5% int., 84.9% control.

Mean age (SD): 61 (11) int., 64 (9) control

Age range: NR (18-75 inclusion criteria)

Smokers: NR

Hypertension: NR

Medications taken by at least 50% of those in the control group: beta-blockers, ACE inhibitors, furosemide, amiodarone, aldosterone blockers

Medications taken by 20-49% of those in the control group: NR

Medications taken by some, but less than 20% of the control group: statins, ARB

Location: Italy

Ethnicity: NR

**Interventions** Type: supplement (Omacor)

Comparison: EPA & DHA vs MUFA

Intervention: 2x1g/d Omacor (1.7g/d EPA+DHA at a ratio of 0.9 to 1.5): EPA+DHA 1.7g/d

Control: 2x1g/d olive oil (gelatin capsules identical in appearance to Omacor)

Compliance: Pill counts - participants were withdrawn if <80% capsules taken (none were withdrawn).

Fatty acid EPA+DHA 0.83% in intervention group, 0.41% in control group.

Duration of intervention: 12 months

**Outcomes** Main study outcome: Left ventricular function and functional capacity

Dropouts: 0 int., 0 control

Available outcomes: hospitalisation for cardiovascular reasons, hospitalisation for worsening heart failure, lipids, blood glucose, serum cytokine (No deaths)

Response to contact: No

**Notes** Study funding: Centro per lo Studio ed il Trattamento dello Scopenso Cardiaco, one author was a consultant for 8 pharmaceutical companies

### Risk of bias table

| Bias                                                      | Authors' judgement | Support for judgement                                                                                                                                                         |
|-----------------------------------------------------------|--------------------|-------------------------------------------------------------------------------------------------------------------------------------------------------------------------------|
| Random sequence generation (selection bias)               | Unclear risk       | "randomised"                                                                                                                                                                  |
| Allocation concealment (selection bias)                   | Unclear risk       | not described                                                                                                                                                                 |
| Blinding of participants and personnel (performance bias) | High risk          | Paper states that placebo and verum were identical and that the study was double blind, but blinding of participants not checked. Author confirmed investigators not blinded. |
| Blinding of outcome assessment (detection bias)           | High risk          | Author confirmed assessors not blinded.                                                                                                                                       |
| Incomplete outcome data (attrition bias)                  | Unclear risk       | Unclear whether all participants were assessed for all outcomes (eg hospitalisation), but some outcomes report no attrition.                                                  |
| Selective reporting (reporting bias)                      | Unclear risk       | NCT01223703 - study registration Oct 2010, recruitment Nov 2007 to June 2009. Retrospective. All outcomes reported.                                                           |
| Attention                                                 | Low risk           | No suggestion of this, and investigators appeared blinded (so could not differ in attention provided by                                                                       |

|            |                                       |                                                                                                                                                                                |
|------------|---------------------------------------|--------------------------------------------------------------------------------------------------------------------------------------------------------------------------------|
| Compliance | <input type="text" value="Low risk"/> | allocation)<br>Pill counts - participants were withdrawn if <80% capsules taken (none were withdrawn). Fatty acid EPA+DHA 0.83% in intervention group, 0.41% in control group. |
| Other bias | <input type="text" value="Low risk"/> | None noted                                                                                                                                                                     |

## Nogueira 2016 <sup>89 90</sup>

|                      |                                                                                                                                                                                                                                                                                                                                                                                                                                                                                                                                      |
|----------------------|--------------------------------------------------------------------------------------------------------------------------------------------------------------------------------------------------------------------------------------------------------------------------------------------------------------------------------------------------------------------------------------------------------------------------------------------------------------------------------------------------------------------------------------|
| <b>Methods</b>       | RCT, parallel, (n3 EPA+DHA vs non-fat), 6 months<br>Summary risk of bias: Moderate or high                                                                                                                                                                                                                                                                                                                                                                                                                                           |
| <b>Participants</b>  | Patients with non-alcoholic steatohepatitis<br>N: 32 int., 28 control. (analysed, int: 27 cont: 23)<br>Level of risk for CVD: Low<br>Male: 14.8% int., 21.7% control<br>Mean age (SD): 52.5 (7.2) int., 53.9 (6.8) control<br>Age range: NR<br>Smokers: NR<br>Hypertension: NR<br>Medications taken by at least 50% of those in the control group: NR<br>Medications taken by 20-49% of those in the control group: NR<br>Medications taken by some, but less than 20% of the control group: NR<br>Location: Brazil<br>Ethnicity: NR |
| <b>Interventions</b> | Type: supplement (capsules with n-3 PUFA or mineral oil)<br>Comparison: n-3 (EPA+DHA+ALA) vs nil<br>Intervention: 3 capsules/d omega 3 (including 0.6g/d ALA, 0.194g/d EPA + 0.15g/d DHA, Amway): EPA+DHA 0.345g/d plus ALA 0.6g/d<br>Control: 3 capsules/d placebo mineral oil capsules<br><b>PUFA Dose:</b> (intended) increase 1.0g/d EPA+DHA+ALA, <b>0.5%E n-3, 0.5%E PUFA</b><br>Compliance: Plasma fatty acid changes<br>Duration of intervention: 6 months                                                                    |
| <b>Outcomes</b>      | Main study outcome: NAS activity<br>Dropouts: 5 int., 5 control<br>All Outcomes collected but unusable due to unclear interpretation about % improvement: Lipids, anthropometrics, glucose, insulin, HbA1c, inflammatory markers<br>Response to contact: No, author contacted (July 2017) but no reply.                                                                                                                                                                                                                              |
| <b>Notes</b>         | Study funding: University of Sao Paulo.                                                                                                                                                                                                                                                                                                                                                                                                                                                                                              |

### Risk of bias table

| Bias                                                      | Authors' judgement                        | Support for judgement                                                                                                         |
|-----------------------------------------------------------|-------------------------------------------|-------------------------------------------------------------------------------------------------------------------------------|
| Random sequence generation (selection bias)               | <input type="text" value="Low risk"/>     | Computer generated sequence                                                                                                   |
| Allocation concealment (selection bias)                   | <input type="text" value="Unclear risk"/> | "Included patients were enrolled in the study by two trained investigators following this randomization sequence"             |
| Blinding of participants and personnel (performance bias) | <input type="text" value="Unclear risk"/> | Double-blind and "identical" capsules. However no information provided as to their smell and taste.                           |
| Blinding of outcome assessment (detection bias)           | <input type="text" value="Unclear risk"/> | With the exception of an independent dietician, staff remained blinded until the end of the statistical analysis of the trial |
| Incomplete outcome data (attrition bias)                  | <input type="text" value="Low risk"/>     | 8% Drop outs balanced by group, with reasons given                                                                            |
| Selective reporting (reporting bias)                      | <input type="text" value="Unclear risk"/> | Not all outcomes clearly reported                                                                                             |
| Attention                                                 | <input type="text" value="Low risk"/>     | No suggestion of this                                                                                                         |
| Compliance                                                | <input type="text" value="Low risk"/>     | Significant change in plasma fatty acids                                                                                      |
| Other bias                                                | <input type="text" value="Low risk"/>     | None noted                                                                                                                    |

## Nomura 2009 <sup>91</sup>

**Methods** RCT, parallel, (n3 EPA vs nil, both with statins), 6 months  
Summary risk of bias: Moderate or high

**Participants** Hyperlipidaemic type 2 diabetics  
N: 72 int., 64 control. (analysed, int: 72 cont: 64)  
Level of risk for CVD: Moderate  
Male: 52.9% in both groups combined  
Mean age (SD): 65 (3) in both groups combined  
Age range: NR  
Smokers: 11% in both groups combined  
Hypertension: 44% in both groups combined  
Medications taken by at least 50% of those in the control group: NR  
Medications taken by 20-49% of those in the control group: NR  
Medications taken by some, but less than 20% of the control group: Insulin, aspirin, ticlopidine, Ca-antagonists, ARBs, sulfonylureas, alpha-glucoside inhibitors  
Location: Japan  
Ethnicity: NR

**Interventions** Type: supplement (EPA + Pitavastatin vs Pitavastatin)  
Comparison: EPA vs none  
Intervention: Daily capsules (1.8g/d EPA + 2mg/d Pitavastatin): EPA 1.8g/d  
Control: Daily capsules (2mg/d Pitavastatin)  
Compliance: NR  
Duration of intervention: 6 months

**Outcomes** Main study outcome: Platelet-derived microparticles and adiponectin  
Dropouts: NR  
Available outcomes: Lipids and HbA1c (HbA1c not in useable format- baseline differences)  
Response to contact: No contact attempted

**Notes** A third arm (EPA only) was also included (n=55)  
Study funding: Grant from the Japan Foundation of Neuropsychiatry and Hematology Research, grant for Advanced Medical Care from the Ministry of Health and Welfare of Japan, and a grant from the Ministry of Education, Science and Culture of Japan

### Risk of bias table

| Bias                                                      | Authors' judgement | Support for judgement               |
|-----------------------------------------------------------|--------------------|-------------------------------------|
| Random sequence generation (selection bias)               | Unclear risk       | "randomly selected"                 |
| Allocation concealment (selection bias)                   | Unclear risk       | As above                            |
| Blinding of participants and personnel (performance bias) | Unclear risk       | Not reported                        |
| Blinding of outcome assessment (detection bias)           | Unclear risk       | Not reported                        |
| Incomplete outcome data (attrition bias)                  | Unclear risk       | Not reported and blinding not clear |
| Selective reporting (reporting bias)                      | Unclear risk       | No registry or protocol identified  |
| Attention                                                 | Unclear risk       | Not reported                        |
| Compliance                                                | Unclear risk       | Not reported                        |
| Other bias                                                | Low risk           | None noted                          |

## Norwegian - Natvig 1968 <sup>92 93</sup>

**Methods** Norwegian Vegetable Oil Experiment of 1965-6  
RCT, parallel, 2 arms (n3 ALA vs n6 LA), 1 year.  
Risk of bias: Moderate or high

**Participants** Men working in Norwegian companies aged 50-59 years  
N: 6716 int., 6690 control  
Level of risk for CVD: Low (working men, though a few had had a previous MI or angina)  
Male: 100%

Mean age (SD): Unclear  
 Age range: 50-59  
 Smokers: Unclear (~48% non-smokers)  
 Hypertension: Unclear  
 Medications taken by at least 50% of those in the control group: NS  
 Medications taken by 20-49% of those in the control group: NS  
 Medications taken by some, but less than 20% of the control group: NS  
 Location: Norway  
 Ethnicity: Unclear

**Interventions** Type: supplement (oil)  
 Comparison: ALA vs omega 6  
 Intervention: linseed oil, 10 ml /d (55% ALA), 5.5g/d ALA, 1.5g/d linoleic: ALA 5.5g/d  
 Control: sunflower oil, 10 ml/d (1.4% ALA), 0.1g/d ALA, 6.3g/d linoleic. Vitamin E was added to both oils.  
 Compliance: 73% were still taking the linseed oil at 1 year, 72% were still taking their sunflower oil at 1 year (unclear how this was ascertained).  
 Duration of intervention: 12 months

**Outcomes** Main study outcome: morbidity and mortality  
 Dropouts: survival status was traced for all but 4 included men, health status was missing for about 80 men in total or 0.6%.  
 Available outcomes: total and CV deaths, MI, angina, stroke, peripheral vascular disease, combined CV events, diagnosis type 2 diabetes, total cholesterol (subgroup)  
 Response to contact: Not attempted as study published in the 1960s

**Notes** Study funding: Not stated

### Risk of bias table

| Bias                                                      | Authors' judgement | Support for judgement                                                                                                                                                                                                                                                          |
|-----------------------------------------------------------|--------------------|--------------------------------------------------------------------------------------------------------------------------------------------------------------------------------------------------------------------------------------------------------------------------------|
| Random sequence generation (selection bias)               | Unclear risk       | Paper states "simple randomisation" without clarification                                                                                                                                                                                                                      |
| Allocation concealment (selection bias)                   | Unclear risk       | Few details provided                                                                                                                                                                                                                                                           |
| Blinding of participants and personnel (performance bias) | Low risk           | Paper states that the workplace doctors who administered the trial locally were sent bottles for each participant marked only with their trial number, and that "appearance and taste of the products were so similar that most participants were unable to identify the type" |
| Blinding of outcome assessment (detection bias)           | Low risk           | Company physicians recorded health status, and were also blinded to intervention (as above)                                                                                                                                                                                    |
| Incomplete outcome data (attrition bias)                  | Low risk           | Detailed description, and those who left employment during the study were followed up for survival and morbidity via the main health system                                                                                                                                    |
| Selective reporting (reporting bias)                      | Unclear risk       | No protocol or trials registration found                                                                                                                                                                                                                                       |
| Attention                                                 | Low risk           | As company physicians administered oils and assessed outcomes but were blind to treatment arm there could not be attention bias                                                                                                                                                |
| Compliance                                                | Unclear risk       | 73% were still taking the linseed oil at 1 year, 72% were still taking their sunflower oil at 1 year (unclear how this was ascertained)                                                                                                                                        |
| Other bias                                                | Low risk           | None noted                                                                                                                                                                                                                                                                     |

### OFAMI - Nilsen 2001<sup>94</sup>

**Methods** Omacor Following Acute Myocardial Infarction (OFAMI)  
 RCT, parallel, 2 arms (n3 EPA+DHA vs n6 LA), 2 years  
 Summary risk of bias: Moderate or high

**Participants** Patients recruited 4-8 days after confirmed MI  
 N: 150 int., 150 control  
 Level of risk for CVD: High  
 Male: 77% int., 82% control

Mean age (SD): 64.4 int., 63.6 control (no SD)  
 Age range: 28-86 int., 29-87 control  
 Smokers: 39% int., 38% control  
 Hypertension: 29% int., 23% control  
 Medications taken by at least 50% of those in the control group: B-blockers, aspirin  
 Medications taken by 20-49% of those in the control group: statins, ACE inhibitors  
 Medications taken by some, but less than 20% of the control group: diuretics, warfarin  
 Location: Norway  
 Ethnicity: Unclear

**Interventions** Type: supplement (capsules)  
 Comparison: EPA & DHA vs omega 6  
 Intervention: Omacor capsules 4/d: EPA+DHA 3.5g/d  
 Control: corn oil capsules, 4/d  
 Compliance: assessed by questionnaire and capsule count, 82% int group had complete compliance after 6 weeks, 86% of controls  
 Length of intervention: 24 months

**Outcomes** Main study outcome: CV events  
 Dropouts: unclear  
 Available outcomes: total and CV deaths, MI, unstable angina, interventions, combined CV events, BMI, lipids, BP (authors provided additional data on glucose, AF, stroke)  
 Response to contact: Yes

**Notes** Study funding: Pharmacia-Upjohn and Pronova

### Risk of bias table

| Bias                                                      | Authors' judgement | Support for judgement                                                                                                                                                                                               |
|-----------------------------------------------------------|--------------------|---------------------------------------------------------------------------------------------------------------------------------------------------------------------------------------------------------------------|
| Random sequence generation (selection bias)               | Unclear risk       | "randomly assigned" - Pharmacia was responsible for randomisation                                                                                                                                                   |
| Allocation concealment (selection bias)                   | Low risk           | Author confirmed allocation was concealed                                                                                                                                                                           |
| Blinding of participants and personnel (performance bias) | Low risk           | Identical capsules containing either Omacor or corn oil were supplied by Pharmacia in collaboration with Pronova. Double blinding stated, but taste not reported as masked and blinding of participants not checked |
| Blinding of outcome assessment (detection bias)           | Low risk           | Author stated: all analyses was performed without the knowledge of outcome.                                                                                                                                         |
| Incomplete outcome data (attrition bias)                  | Unclear risk       | Number of drop outs was unclear                                                                                                                                                                                     |
| Selective reporting (reporting bias)                      | Unclear risk       | Trials registry NCT01422317. Outcomes reported in trials registry appear to have been published, but registration was retrospective.                                                                                |
| Attention                                                 | Low risk           | All participants appear to have been reviewed at the same intervals                                                                                                                                                 |
| Compliance                                                | Unclear risk       | Assessed by questionnaire and capsule count, 82% int group had complete compliance after 6 weeks, 86% of controls                                                                                                   |
| Other bias                                                | Low risk           | None noted                                                                                                                                                                                                          |

### OPAL - Dangour 2010 <sup>7 95-97</sup>

**Methods** Older People And n- 3 Long-chain polyunsaturated fatty acid (OPAL)  
 2 arm, parallel, RCT, 24mo (n3 EPA+DHA vs MUFA)  
 Summary risk of bias: Low

**Participants** Healthy cognitively normal adults aged 70-79  
 N: 434 int., 433 control (analysed 376 int., 372 control)  
 Level of risk for CVD: Low  
 Male: 53.4% int., 56.6% control  
 Mean age (SD): 74.7 (2.5) int., 74.6 (2.7) control  
 Age range: 70-79 years  
 Smokers: NR  
 Hypertension: 54.9% int, 56.9% control  
 Medications taken by at least 50% of those in the control group: NR

Medications taken by 20-49%: NR  
 Medications taken by some, but <20%: NR  
 Location: England and Wales  
 Ethnicity: NR

**Interventions** Type: supplement (capsules)  
 Comparison: EPA & DHA vs MUFA  
 Intervention: 2x 650 mg capsule/d Ocean Nutrition vanilla flavoured soft gelatin capsule ( total daily dose of 200mg EPA and 500mg DHA): EPA+DHA 0.7g/d  
 Control: 2 x 650mg olive oil capsule identical to intervention  
 Compliance: Count returned capsules. Capsules not returned (Int., median: 0.95; IQR: 0.82, 1.00; control median: 0.95; IQR: 0.81, 1.00). Fatty acid data: EPA, int., 49.9, 2.7 (mean, SD); control, 39.1, 3.1. DHA, int., 95.6, 3.1; control, 70.7, 2.9.  $\alpha$ -linoleic: int., 21.5, 0.8; control, 22.0, 0.9.  
 Length of intervention: 24 months

**Outcomes** Main study outcome: Delayed onset of cognitive decline  
 Dropouts: Control: 78(8-died, 53-withdrew, 17-discontinued intervention but provided data ) Int: 67(9-died, 49-withdrew, 9-discontinued intervention but provided data)  
 Available outcomes: deaths, MI, arrhythmias, stroke, diabetes, lipids  
 Response to contact: Yes

**Notes** Study funding: UK Food Standards Agency, NHS R&D provided support costs.

**Risk of bias table**

| Bias                                                      | Authors' judgement | Support for judgement                                                                                                                                                                                                                                                                               |
|-----------------------------------------------------------|--------------------|-----------------------------------------------------------------------------------------------------------------------------------------------------------------------------------------------------------------------------------------------------------------------------------------------------|
| Random sequence generation (selection bias)               | Low risk           | Participants were "selected in random blocks". "Research nurses telephoned a central computerized randomization service to obtain treatment allocation codes".                                                                                                                                      |
| Allocation concealment (selection bias)                   | Low risk           | Central allocation via telephone                                                                                                                                                                                                                                                                    |
| Blinding of participants and personnel (performance bias) | Low risk           | Identical capsules (vanilla-flavoured, dark-brown coloured). Supplements packaged into identical pots, each containing 180 capsules, labelled by staff not involved in the study. All project staff were unaware of group assignments until after data analysis.                                    |
| Blinding of outcome assessment (detection bias)           | Low risk           | All project staff were unaware of group assignments until after data analysis.                                                                                                                                                                                                                      |
| Incomplete outcome data (attrition bias)                  | Low risk           | Participants who discontinued the supplements invited to an interview at 24 months. Dropouts explained and similar in both arms (int 49 withdrew, control 53 withdrew, 12%).                                                                                                                        |
| Selective reporting (reporting bias)                      | High risk          | ISRCTN72331636. Trial registered 2004, before study began. Protocol published 2006. Publication of first results 2010. Many outcomes, such as depression and BP were stated in trials registry entry but not reported.                                                                              |
| Attention                                                 | Low risk           | All participants had the same review schedule, and staff were unaware of assignments                                                                                                                                                                                                                |
| Compliance                                                | Low risk           | Count returned capsules. Capsules not returned (Int., median: 0.95; IQR:0.82, 1.00; control median: 0.95; IQR: 0.81, 1.00). Fatty acid data: EPA, int., 49.9, 2.7 (mean, SD); control, 39.1, 3.1. DHA, int., 95.6, 3.1; control, 70.7, 2.9. $\alpha$ -linoleic: int., 21.5, 0.8; control, 22.0, 0.9 |
| Other bias                                                | Low risk           | None noted                                                                                                                                                                                                                                                                                          |

**OPTILIP 2006** <sup>98 99</sup>

**Methods** Quantification of the Optimal n6/n3 ratio in the UK Diet (OPTILIP)  
 RCT, parallel, 5 arms (n3 EPA+DHA vs n3 ALA vs n6 LA), 6 months  
 Summary risk of bias: Moderate or high

**Participants** Men and postmenopausal women aged 45-70 years  
 N: 308 randomised overall (analysed, n-3 int: 61; ALA int: 53; cont: 44)  
 Level of risk for CVD: Low

Male: 57% n-3 int., 60% ALA int; 68% control.  
 Mean age (SD): n-3 int., 62; ALA int., 60; control 58 years (SD not reported)  
 Age range: 45-70 years overall  
 Smokers: 16% overall  
 Hypertension: 41% overall  
 Medications taken by at least 50% of those in the control group: NR  
 Medications taken by 20-49% of those in the control group: HRT  
 Medications taken by some, but less than 20% of the control group: BP medication, lipid lowering medication, thyroxine  
 Location: UK  
 Ethnicity: NR

**Interventions** Type: food supplements (spread, oil, canned fish in varying quantities)  
 Comparison: long chain n-3 vs low long chain n-3; and high ALA vs low ALA  
 Intervention:  
**For n-3 group:** Advice to increase oily fish to 2 portions/wk, provided 2 cans tinned salmon and salmon pate/wk (John West and Arctic Fjord), and supplements of 20g/d spread (n-3 EPA & DHA content 2.0g/100g + ALA 5.3g/100g, Unilever) and 16g/d oil (ALA content 0.3g/100g, Anglia Oils) giving overall diet ratio of n-6:n-3 of 3:1: EPA+DHA & ALA unclear  
**For high linolenate group:** No advice to increase oily fish, provided 2 cans tuna/wk (John West), and supplements of 20g/d spread (ALA 5.0g/100g, Unilever) and 16g/d oil (ALA content 8.9g/100g, Anglia Oils) giving overall diet ratio of n-6:n-3 of 3:1: EPA+DHA & ALA unclear  
**Control:** No advice to increase oily fish, provided 2 cans tuna/wk (John West), and supplements of 20g/d spread (ALA 0.5g/100g, Unilever) and 16g/d oil (ALA content 0.3g/100g, Anglia Oils); otherwise habitual diet, giving overall diet ratio of n-6:n-3 of 10:1  
 Compliance: Dietary record and erythrocyte EPA and DHA  
 Duration of intervention: 6 months

**Outcomes** Main study outcome: Lipids, insulin sensitivity and clotting factors  
 Dropouts: 48 overall  
 Available outcomes: Insulin, glucose, HOMA, QUICKI, lipids (geometric means- triglycerides not used for ALA comparison and insulin not used for n-3 comparison due to baseline differences)  
 Response to contact: No

**Notes** 5 arms overall- the "moderate linolenate diet" and the "n-3 + linolenate diet" not discussed here  
 Study funding: Food Standards Agency (with supplemented foods supplied as detailed above)

### Risk of bias table

| Bias                                                      | Authors' judgement | Support for judgement                                                     |
|-----------------------------------------------------------|--------------------|---------------------------------------------------------------------------|
| Random sequence generation (selection bias)               | Unclear risk       | "randomly assigned"                                                       |
| Allocation concealment (selection bias)                   | Unclear risk       | As above                                                                  |
| Blinding of participants and personnel (performance bias) | High risk          | Fish increase requested for n-3 group so participants unblinded           |
| Blinding of outcome assessment (detection bias)           | Unclear risk       | NR                                                                        |
| Incomplete outcome data (attrition bias)                  | Unclear risk       | Numbers randomised to each group and therefore drop outs by group unclear |
| Selective reporting (reporting bias)                      | Unclear risk       | No registry or protocol identified                                        |
| Attention                                                 | Unclear risk       | NR                                                                        |
| Compliance                                                | Low risk           | Significant increase in EPA/DHA content of erythrocytes in n-3 groups     |
| Other bias                                                | Low risk           | None identified                                                           |

### ORIGIN 2012 <sup>100-103</sup>

**Methods** Outcome Reduction With Initial Glargine Intervention (ORIGIN)  
 RCT, 2x2 factorial, (n3 EPA+DHA vs MUFA), 72 months  
 Summary risk of bias: Low

**Participants** People at high risk of CV events with impaired fasting glucose, impaired glucose tolerance or diabetes  
 N: 6319 int., 6292 control. (analysed, int: 6281 cont: 6255)

Level of risk for CVD: moderate  
 Male: 65.4% int., 64.7% control.  
 Mean age (SD): 63.5 (7.8) int., 63.6 (7.9) control  
 Age range: unclear, eligible if aged ≥50years  
 Smokers: current smokers 12.1% int, 12.6% control  
 Hypertension: 78.7% int, 80.3% cont  
 Medications taken by at least 50% of those in the control group: ACE inhibitor or ARB, aspirin or other antiplatelet, beta-blocker, statin, glucose lowering drug.  
 Medications taken by 20-49%: calcium-channel blocker  
 Medications taken by some, but less than 20%: thiazide diuretics, anticoagulant  
 Location: 40 study locations in Europe and the Americas  
 Ethnicity: unclear

**Interventions** Type: supplement capsule (Omacor)  
 Comparison: EPA & DHA vs MUFA  
 Intervention: 1 gelatin capsule/d Omacor containing at least 900mg ethyl esters of n-3 fats (465mgEPA + 375mgDHA): EPA+DHA 0.84g/d  
 Control: 1x1g gelatin capsule/d olive oil  
 Compliance: methods of assessment unclear, but reported that "rates of adherence to the study-drug regimen were similar in the two groups with 96% of patients continuing to receive the study drug at 1 year.... and 88% at the end of the study".  
 Length of intervention: 74 months mean follow up (Median 6.2 years)

**Outcomes** Main study outcome: Composite of the First Occurrence of Cardiovascular (CV) Death, Nonfatal Myocardial Infarction (MI) or Nonfatal Stroke  
 Dropouts: 38 int., 37 control (some of the remainder did not have final outcome status, were lost or withdrew consent, but were included in analysis)  
 Available outcomes: mortality, CV mortality, fatal arrhythmia, MI, stroke, heart failure, angina, revascularization, breast cancer, cancer diagnoses and cancer deaths, BP, lipids (HbA1c given as medians only)  
 Response to contact: Yes

**Notes** The other 2x2 assignment was to insulin glargine versus standard care, and is not discussed here. Results are reported here for the trial duration and not the follow up post trial (The ORIGIN and Legacy Effects, ORIGINALE).  
 Study funding: From Sanofi Aventis, Omacor provided by Pronova Biocare

### Risk of bias table

| Bias                                                      | Authors' judgement | Support for judgement                                                                                                                                                                                                          |
|-----------------------------------------------------------|--------------------|--------------------------------------------------------------------------------------------------------------------------------------------------------------------------------------------------------------------------------|
| Random sequence generation (selection bias)               | Low risk           | "randomized by an automated telephone randomization system (using randomly varying block sizes)"                                                                                                                               |
| Allocation concealment (selection bias)                   | Low risk           | as above                                                                                                                                                                                                                       |
| Blinding of participants and personnel (performance bias) | Low risk           | Study described as "double blind" and placebo described as identical. Blinding of patients, investigators, local and central trials personnel described. However no information provided as to the capsule's smell and taste   |
| Blinding of outcome assessment (detection bias)           | Low risk           | "all primary and secondary outcomes were adjudicated with the use of prespecified definitions by a committee whose members were unaware of study-group assignments"                                                            |
| Incomplete outcome data (attrition bias)                  | Low risk           | Almost all participants were included in outcomes                                                                                                                                                                              |
| Selective reporting (reporting bias)                      | Low risk           | NCT00069784 - registered Oct 2003, study started Aug 2003, final data collection Dec 2011. Most outcomes appear to have been reported in various publications (cardiovascular events only reported by glargine randomisation). |
| Attention                                                 | Low risk           | No suggestion of differences between groups                                                                                                                                                                                    |
| Compliance                                                | Unclear risk       | Methods of assessment unclear, but reported that "rates of adherence to the study-drug regimen were similar in the two groups with 96% of patients                                                                             |



continuing to receive the study drug at 1 year.... and 88% at the end of the study".

Other bias

Low risk  None noted

## ORL - Tatsuno 2013 <sup>104</sup>

**Methods** Omega-3 fatty acids Randomized Long-term trial (ORL)  
 RCT- parallel, 3 arms (n3 EPA+DHA high dose vs low dose vs n3 EPA), 12 months  
 Summary risk of bias: Moderate or high

**Participants** Population: Japanese adults with hypertriglyceridaemia  
 N: 171 int (4g TAK), 165 control (2g TAK).  
 Level of risk for CVD: Moderate  
 Male: 70.8% int., 71.5% control  
 Mean age (SD): 55.9 (10.12) int., 56 (10.95) control  
 Age range: 20-74  
 Smokers (current): 27.5% int., 31.5% control  
 Hypertension: 66.7% int., 67.3% control  
 Medications taken by at least 50% of those in the control group: HMG-CoA reductase inhibitor  
 Medications taken by 20-49%: Statin  
 Medications taken by some, but less than 20%: NR  
 Location: Japan  
 Ethnicity: unclear

**Interventions** Type: supplement (TAK-085 capsules)  
 Comparison: EPA & DHA higher vs lower dose  
 Intervention: 1x2/d capsule each containing 2g of TAK-085 (1g of fatty acid in TAK-085 capsules contains approximately 465 mg of EPA-E plus 375 mg of DHA-E). Total dose of 1.86g/d EPA & 1.5 g/d DHA: EPA+DHA 3.36g/d  
 Control: 1 capsule/d containing 2g of TAK-085 (1g of fatty acid in TAK-085 capsules contains approximately 465 mg of EPA-E plus 375 mg of DHA-E). Total dose of 0.93g/d EPA & 0.75g/d DHA.  
 Compliance: monitored every 4 weeks, mean rate of compliance reported as >96% in each group.  
 Length of intervention: 12 months

**Outcomes** Main study outcome: Safety outcomes and adverse events  
 Dropouts: 8 G1, 14 G2, 21 G3  
 Available outcomes: TG, LDL, adverse events (including CVD events, cancers, diagnosis type 2 diabetes), CRP, waist circumference, weight, blood pressure (Nil death) (Total cholesterol and HDL reported as %change from baseline, but not used as baseline not reported).  
 Response to contact: No

**Notes** A third arm of EPA-E 1.8g supplementation is not used here. Outcome data used TAK-4 vs TAK-2  
 Study funding: Funded by Takeda Pharmaceutical Company

### Risk of bias table

| Bias                                                      | Authors' judgement                         | Support for judgement                                                                                                                                            |
|-----------------------------------------------------------|--------------------------------------------|------------------------------------------------------------------------------------------------------------------------------------------------------------------|
| Random sequence generation (selection bias)               | Low risk <input type="button" value="v"/>  | Randomization was stratified according to statin use and performed by an independent registration centre                                                         |
| Allocation concealment (selection bias)                   | Low risk <input type="button" value="v"/>  | Randomization was stratified according to statin use and performed by an independent registration centre                                                         |
| Blinding of participants and personnel (performance bias) | High risk <input type="button" value="v"/> | Open label                                                                                                                                                       |
| Blinding of outcome assessment (detection bias)           | High risk <input type="button" value="v"/> | Open label                                                                                                                                                       |
| Incomplete outcome data (attrition bias)                  | Low risk <input type="button" value="v"/>  | All participants were accounted for and analysed for main outcomes                                                                                               |
| Selective reporting (reporting bias)                      | Low risk <input type="button" value="v"/>  | Trials registry entry May 2011, study start date Nov 2009, completion Nov 2011, so partially retrospective. However, entry appears to reflect reported outcomes. |
| Attention                                                 | Low risk <input type="button" value="v"/>  | Capsules, follow up appeared identical                                                                                                                           |
| Compliance                                                | Low risk <input type="button" value="v"/>  | Monitored every 4 weeks, mean rate of compliance reported as >96% in each group                                                                                  |
| Other bias                                                | Low risk <input type="button" value="v"/>  | None noted                                                                                                                                                       |

## Patch 2005 <sup>105 106</sup>

**Methods** RCT, parallel, (n3 EPA+DHA vs nil), 6 months  
Summary risk of bias: Moderate or high

**Participants** Healthy overweight people with mild TG elevation  
N: 40 int., 45 control. (analysed, int: 38 cont: 37)  
Level of risk for CVD: Low  
Male: 48% int., 51% control.  
Mean age (SD): 50.4 (14.5) int., 50.2 (9.4) control  
Age range: NR but inclusion criteria were 20-65 years  
Smokers: NR  
Hypertension: NR  
Medications taken by at least 50% of those in the control group: NR  
Medications taken by 20-49% of those in the control group: NR  
Medications taken by some, but less than 20% of the control group: NR  
(Those taking antihypertensives were excluded)  
Location: Australia  
Ethnicity: NR

**Interventions** Type: supplemented food  
Comparison: foods supplemented with omega 3 vs non-supplemented foods  
Intervention: 8 portions/d of foods supplemented with microencapsulated cod fish oil (Maritex), providing 1.0g/d of a mixture of EPA+DHA: EPA+DHA 1.0g/d  
Control: 8 portions/d of un-supplemented foods  
**PUFA Dose:** (intended) increase 1.0g/d EPA+DHA, **0.5%E n-3, 0.5%E PUFA**  
Compliance: assessed by daily logs, 3d weight food intake, erythrocyte fatty acids, and erythrocyte EPA and DHA were higher in intervention than control at 6 months, but statistical significance unclear  
Duration of intervention: 6 months

**Outcomes** Main study outcome: TG  
Dropouts: 2 of 40 int., 8 of 45 control  
Available outcomes: weight, TG, glucose, CRP, waist/hip ratio (insulin, total cholesterol, BMI too different at baseline to use, BP reported but only 6 months, urinary thromboxane, creatinine, number and function of leukocytes reported but not used)  
Response to contact: No contact attempted

**Notes** Study funding: Linkage grant from Australian Research Council, Goodman Fielder Ltd (Sydney) provided financial support and product development expertise.

### Risk of bias table

| Bias                                                      | Authors' judgement | Support for judgement                                                                                                                                                                                                                                                |
|-----------------------------------------------------------|--------------------|----------------------------------------------------------------------------------------------------------------------------------------------------------------------------------------------------------------------------------------------------------------------|
| Random sequence generation (selection bias)               | Low risk           | Block randomisation to balance groups according to baseline TG and BMI                                                                                                                                                                                               |
| Allocation concealment (selection bias)                   | Unclear risk       | No details                                                                                                                                                                                                                                                           |
| Blinding of participants and personnel (performance bias) | Low risk           | "Intervention foods (enriched with long-chain n-3 fatty acids) and equivalent control foods (not enriched) were supplied to all subjects in unmarked packages with one of two codes. The content of the study foods was blinded to subjects as well as researchers." |
| Blinding of outcome assessment (detection bias)           | Low risk           | As above                                                                                                                                                                                                                                                             |
| Incomplete outcome data (attrition bias)                  | Unclear risk       | Numbers included differ by paper                                                                                                                                                                                                                                     |
| Selective reporting (reporting bias)                      | Unclear risk       | No protocol or trials register found                                                                                                                                                                                                                                 |
| Attention                                                 | Low risk           | Timing and attention appear to be similar by arm                                                                                                                                                                                                                     |
| Compliance                                                | Unclear risk       | Unclear whether erythrocyte fatty acids differed statistically significantly by arm                                                                                                                                                                                  |
| Other bias                                                | Low risk           | None noted                                                                                                                                                                                                                                                           |

## Pratt 2009 <sup>107 108</sup>

**Methods** RCT, parallel, (n3 EPA+DHA vs n6 LA), 6 months  
Summary risk of bias: Moderate or high

**Participants** People with paroxysmal or persistent AF  
N: 332 int., 331 control. (analysed, int: 293-322 cont: 291-323)  
Level of risk for CVD: high  
Male: 60% int., 53% control.  
Mean age (SD): 59.8 (13.4) int., 61.2 (12.3) control  
Age range: NR (inclusion criterion was ≥18 years  
Smokers: NR  
Hypertension: NR  
Medications taken by at least 50% of those in the control group: NR  
Medications taken by 20-49% of those in the control group: Angiotensin converting enzyme inhibitors or angiotensin II receptor blocker 37%, statins 45%  
Medications taken by some, but less than 20% of the control group: antiarrhythmic drugs  
Location: USA  
Ethnicity: 4% African American, 92% White, 4% other

**Interventions** Type: supplement  
Comparison: prescription omega 3 vs corn oil  
Intervention: 4x1g/d prescription omega 3 capsules (Lovaza, 1.86g/d EPA, 1.5g/d DHA) after 1 week of double (loading) dose: EPA+DHA 3.36g/d  
Control: 4x1g/d corn oil capsules (assume 1 week loading dose also)  
Compliance: method of assessment unclear, but 3/332 excluded for non-adherence  
Duration of intervention: 1 week loading dose plus 24 weeks standard dose, 25 week total

**Outcomes** Main study outcome: prevention of recurrent symptomatic AF  
Dropouts: 39 of 332 discontinued int., 40 of 331 discontinued control  
Collected outcomes: HbA1c increase, TG increase: but these not useable, only described qualitatively.  
Also major depression diagnosis, suicide (cancer diagnoses, atrial fibrillation and many related outcomes reported but only 6 months data, details adverse event data)  
Response to contact: No contact attempted

**Notes** Study funding: GlaxoSmithKline

### Risk of bias table

| Bias                                                      | Authors' judgement | Support for judgement                                                                                                                                      |
|-----------------------------------------------------------|--------------------|------------------------------------------------------------------------------------------------------------------------------------------------------------|
| Random sequence generation (selection bias)               | Unclear risk       | Clinical research organisation generated the randomisation schedule                                                                                        |
| Allocation concealment (selection bias)                   | Low risk           | "site personnel telephoned into an interactive voice response system to obtain a randomization number and were assigned blinded study medication bottles"  |
| Blinding of participants and personnel (performance bias) | Unclear risk       | "blinded medication bottles" suggests blinding but no mention of similarity or taste                                                                       |
| Blinding of outcome assessment (detection bias)           | Low risk           | "biweekly transtelephonic monitoring was used to document asymptomatic recurrences of AF... investigators were blinded to the monitoring results"          |
| Incomplete outcome data (attrition bias)                  | High risk          | 79 of 663 discontinued (12%), reasons provided, similar discontinuation in both arms                                                                       |
| Selective reporting (reporting bias)                      | Low risk           | Trials registry entry in Nov 2006, same month as first data collection. All outcomes in trials registry are reported in publication or on trials register. |
| Attention                                                 | Low risk           | Both arms appear to have had similar schedule, duration and type of appointments                                                                           |
| Compliance                                                | Unclear risk       | Almost no information                                                                                                                                      |
| Other bias                                                | Low risk           | None noted                                                                                                                                                 |

### PREDIMED 2013 <sup>25</sup> 109-121

**Methods** PREvención con Dieta MEDiterránea (PREDIMED)  
RCT, parallel, 3 arms (high PUFA vs low PUFA) 60 months  
Summary risk of bias: Moderate to high

**Participants** Men aged 55 to 80 years and women aged 60 to 80 years, free of CVD but with diabetes or at least 3

**CVD risk factors**

N: Int (Med with nuts) 2454, Cont (Med with olive oil) 2543 - also low fat arm, not discussed here, 2450

Level of risk for CVD: Moderate

Male: Int 46%, Cont 41.3%

Mean age (SD): Int 67 (6), Cont 67 (6) years

Age range: 55-80 years

Smokers: Int 14.5%, Cont 13.9% (current smokers)

Hypertension: Int 82.4%, Cont 82.1%

Medications taken by at least 50% of those in the control group: nil

Medications taken by 20-49% of those in the control group: ACE inhibitors, diuretics, other antihypertensives, statins, oral hypoglycaemics, antiplatelet therapy

Medications taken by some, but less than 20% of the control group: insulin, non-statin lipid lowering, hormone replacement therapy

Location: Spain

Ethnicity: white from Europe 97%, Hispanic from Central or South America 1-2%, other 1.5%

**Interventions** Type: Dietary advice and food supplement

Comparison: PUFA vs MUFA

Intervention: Mediterranean dietary advice plus 30g/d mixed nuts (15g walnuts, 7.5g hazelnuts, 7.5g almonds, provided, rich in ALA and linoleic) - intensive education on diet with individual and up to 20 group sessions with dietitian.

Control: Mediterranean dietary advice plus 1 L/week extra-virgin olive oil (provided) - intensive education on diet with individual and up to 20 group sessions with dietitian.

Compliance: Scores on the 14-item Mediterranean-diet screener increased for the participants in both Mediterranean diet groups. Participants in the two Mediterranean-diet groups significantly increased weekly servings of fish (by 0.3 servings) and legumes (by 0.4 servings) compared with the low fat arm. Participants assigned to a Mediterranean diet with extra-virgin olive oil and those assigned to a Mediterranean diet with nuts significantly increased their consumption of extra virgin olive oil (to 50 and 32 g per day, respectively) and nuts (to 0.9 and 6 servings per week, respectively).

Duration of intervention: 56 months median.

**Outcomes** Main study outcome: Cardiovascular disease events.

Dropouts: Int 6.3% lost to follow up for  $\geq 2$  years, Cont 3.6% lost to follow up for  $\geq 2$  years.

Available outcomes: deaths, CV mortality, stroke, MI, cardiovascular events, diagnosis type 2 diabetes, glucose, insulin, HOMA, metabolic syndrome

Response to contact: No

**Notes** Study funding: Mainly governmental funding, but olive oil and nuts were provided by companies

**Risk of bias table**

| Bias                                                      | Authors' judgement | Support for judgement                                                                                                                                                                                                                                                                                                                                                                                                                                                                                                                                                                       |
|-----------------------------------------------------------|--------------------|---------------------------------------------------------------------------------------------------------------------------------------------------------------------------------------------------------------------------------------------------------------------------------------------------------------------------------------------------------------------------------------------------------------------------------------------------------------------------------------------------------------------------------------------------------------------------------------------|
| Random sequence generation (selection bias)               | High risk          | Tables of random allocation were centrally elaborated. However the main paper <sup>114</sup> was retracted and republished <sup>25</sup> following a statistical analysis suggesting that baseline variables did not appear consistent with randomisation <sup>122</sup> . The republication states that partners were included in the trial without randomisation (in the same arms as family members) and that some clinics allocated by clinic rather than applying the protocol specified individual randomisation. This puts allocation concealment of some participants at high risk. |
| Allocation concealment (selection bias)                   | High risk          | Study nurses in charge of the random allocation were independent of the nursing staff, allocation was performed centrally. But see note above                                                                                                                                                                                                                                                                                                                                                                                                                                               |
| Blinding of participants and personnel (performance bias) | High risk          | Olive oil and nuts arms could not be blinded to participants                                                                                                                                                                                                                                                                                                                                                                                                                                                                                                                                |
| Blinding of outcome assessment (detection bias)           | Low risk           | "All medical records related to end points were examined by the end-point adjudication committee, whose members were unaware of the study-group assignments."                                                                                                                                                                                                                                                                                                                                                                                                                               |
| Incomplete outcome data (attrition bias)                  | Low risk           | "We used four sources of information to identify end points: repeated contacts with participants, contacts with family physicians, a yearly review of medical records, and consultation of the National Death Index."                                                                                                                                                                                                                                                                                                                                                                       |

|                                      |                                           |                                                                                                                                                                                                        |
|--------------------------------------|-------------------------------------------|--------------------------------------------------------------------------------------------------------------------------------------------------------------------------------------------------------|
| Selective reporting (reporting bias) | <input type="text" value="High risk"/>    | Attrition was <10% per year, explained and balanced.<br>Many outcomes in the trials registry entry are not reported by allocated group for the full set of study participants (for example, cognition) |
| Attention                            | <input type="text" value="Low risk"/>     | Appears very similar between the two Mediterranean diet groups                                                                                                                                         |
| Compliance                           | <input type="text" value="Unclear risk"/> | Not reported                                                                                                                                                                                           |
| Other bias                           | <input type="text" value="High risk"/>    | Retraction and republication in 2018 due to randomisation problems not reported in the initial publication. However, new outcome data not provided.                                                    |

## Proudman 2015 <sup>9 123 124</sup>

**Methods** RCT, parallel, (n3 EPA+DHA vs low n3), 12 months  
Summary risk of bias: Low

**Participants** Patients with rheumatoid arthritis <12 months duration, DMARD-naive.

N: 87 int., 53 control. (analysed, int: 75 cont: 47)

Level of risk for CVD: low

Male: 29% int., 25% control.

Mean age (SD): 56.1 (15.9) int., 55.5 (14.1) control

Age range: Unclear

Smokers: 65.1% int., 54.7% control (includes current & previous smokers).

Hypertension: NR

Medications taken by at least 50% of those in the control group: Triple DMARD therapy (SSZ 0.5g/d, HCQ 200mg twice/day and MTX 10mg once per week).

Medications taken by 20-49% of those in the control group: NSAIDS

Medications taken by some, but less than 20% of the control group: Oral or parenteral steroids

Location: Australia

Ethnicity: NR

**Interventions** Type: supplement (fish oil)

Comparison: high EPA & DHA vs low EPA & DHA

Intervention: 10 ml/d fish oil concentrate (BLT Incromegea TG3525) providing 3.2g/d EPA + 2.3g/d DHA: EPA+DHA 5.5g/d

Control: 10 ml/d sunola oil: capelin oil (2:1) providing 0.21 g EPA + 0.19 g DHA/d as TAG (0.40g/day EPA + DHA).

Compliance: Consumption checked at each visit. 100% compliance would be consumption of 3650 mL oil at 12 months. The fish oil group was less compliant than the control group with median intakes of 2482 mL and 3248 mL, respectively (p=0.015, Mann-Whitney U test). This provided an average daily intake of EPA+DHA of 3.7 g and 0.36 g in the fish oil and control groups, respectively.

Duration of intervention: 12 months

**Outcomes** Main study outcome: Disease-modifying anti-rheumatic drugs (DMARD) failure and remission.

Dropouts: 11 int., 6 control

Available outcomes: Mortality (Nil death), adverse events including CVD, DAS score, diabetes.

Response to contact: Yes

**Notes** DAS scores are reported as median and IQR in Proudman 2012 abstract

Study funding: The study was supported by 'the National Health Medical Research Council of Australia and Royal Adelaide Hospital Research Committee. Melrose Health has provided support for ongoing studies.' The oil used in the study was made by the Royal Adelaide Hospital Pharmacy

### Risk of bias table

| Bias                                                      | Authors' judgement                    | Support for judgement                                                                                                                                                             |
|-----------------------------------------------------------|---------------------------------------|-----------------------------------------------------------------------------------------------------------------------------------------------------------------------------------|
| Random sequence generation (selection bias)               | <input type="text" value="Low risk"/> | 'The randomisation schedule was prepared using an online random number generator and involved randomly permuted blocks of size six.'                                              |
| Allocation concealment (selection bias)                   | <input type="text" value="Low risk"/> | 'Randomisation was performed by the RAH pharmacy, which also prepared and provided the study oils in 500 mL identical dark brown bottles labelled with consecutive study numbers' |
| Blinding of participants and personnel (performance bias) | <input type="text" value="Low risk"/> | 'Both participants and investigators/assessors were blinded to the group allocation. Although the control oil was paler in colour than the fish oil, this was not                 |

evident in the brown bottles. The 'fishy' odour of each oil was similar.'

|                                                 |              |                                                                                                                                                                                                                                                                                                                                                                                              |
|-------------------------------------------------|--------------|----------------------------------------------------------------------------------------------------------------------------------------------------------------------------------------------------------------------------------------------------------------------------------------------------------------------------------------------------------------------------------------------|
| Blinding of outcome assessment (detection bias) | Low risk     | Both participants and investigators/assessors were blinded to the group allocation' 'Investigators and subjects remained blinded for all withdrawals.'                                                                                                                                                                                                                                       |
| Incomplete outcome data (attrition bias)        | Low risk     | The flow of all study participants shown in Figure 2, 12% drop out, similar rates between groups                                                                                                                                                                                                                                                                                             |
| Selective reporting (reporting bias)            | Unclear risk | Outcomes reported in trial register matched with the outcomes reported in publications. However, the study was retrospectively registered - registered in 2013, recruitment began in 2001.                                                                                                                                                                                                   |
| Attention                                       | Low risk     | No difference between groups                                                                                                                                                                                                                                                                                                                                                                 |
| Compliance                                      | High risk    | Consumption checked at each visit. 100% compliance would be consumption of 3650 mL oil at 12 months. The fish oil group was less compliant than the control group with median intakes of 2482 mL (68%) and 3248 mL (89%), respectively (p=0.015, Mann-Whitney U test). This provided an average daily intake of EPA+DHA of 3.7 g and 0.36 g in the fish oil and control groups, respectively |
| Other bias                                      | Low risk     | None noted                                                                                                                                                                                                                                                                                                                                                                                   |

## REDUCE-IT 2018<sup>125 126</sup>

**Methods** Reduction of Cardiovascular Events with EPA - Intervention Trial (REDUCE-IT)  
RCT, parallel, (LCn3 vs paraffin oil), median 4.9 years  
Summary risk of bias: moderate or high

**Participants** Patients (45 years+) with hypertriglyceridaemia, and with cardiovascular disease or with DM and another risk factor, and on statin (58% had T2DM)  
N: intervention 4089 randomised, control 4090 randomised (analysed, intervention: 4083 control: 4077)  
Level of risk for CVD: moderate (w DM) and high (with CVD)  
Men: 71.6% intervention, 70.8% control  
Age median (IQ range) years: median 64 (57-69) intervention, 64 (57-69) control  
Age range: not reported, those with CVD included if at least 45 years, those with DM if at least 50 years old  
Smokers: not reported  
Hypertension: not reported  
Medications taken by at least 50% of those in the control group: 100% treated with statins to be randomised  
Medications taken by 20%-49% of those in the control group: not reported  
Medications taken by some, but less than 20% of the control group: ezetimibe  
Location: 11 countries including USA, Netherlands, Ukraine, Russia, South Africa, Poland, India, Romania, Australia, New Zealand  
Ethnicity: white 90.3% intervention, 90.2% control

**Interventions** Type: supplement  
Comparison: EPA vs paraffin  
Intervention: EPA ethyl ester derived from fish oil (AMR101 4 g/d, Amarin), 3.99g/d EPA plus 8mg/d vitamin E (2 capsules twice a day)  
Control: 3.73g/d light liquid paraffin oil in 4 capsules (2 capsules twice a day)  
Compliance: serum EPA assessed, expressed as medians, ~26µg/ml at baseline, at 1 year rose to 144 in intervention group, 23.3 in control.  
Duration of intervention: median 4.9 years (max 6.2 years)

**Outcomes** Main study outcome: composite of cardiovascular death, MI, stroke, coronary revascularisation and hospitalisation for unstable angina  
Dropouts: 6 intervention, 13 control  
Available outcomes: deaths, CVD deaths, CVD events, MACCEs, stroke, MI, sudden cardiac death, new angina, heart failure, amputations due to PVD, atrial fibrillation, revascularisation, DM, TIA, HT, (lipid levels and CRP provided as medians)  
Response to contact: not yet attempted

**Notes** NCT01492361  
Study funding: study designed, run and funded by Amarin (who produce the intervention capsules)

### Risk of bias table

| Bias                                                      | Authors' judgement | Support for judgement                                                                                                                 |
|-----------------------------------------------------------|--------------------|---------------------------------------------------------------------------------------------------------------------------------------|
| Random sequence generation (selection bias)               | Low risk           | stratified randomisation                                                                                                              |
| Allocation concealment (selection bias)                   | Unclear risk       | No details provided                                                                                                                   |
| Blinding of participants and personnel (performance bias) | Low risk           | Participants and personnel stated to be blinded, not clearly stated that containers were identical but capsular content was identical |
| Blinding of outcome assessment (detection bias)           | Low risk           | Adjudication was by independent clinical endpoint committee unaware of assignment                                                     |
| Incomplete outcome data (attrition bias)                  | Low risk           | Low levels of participant loss                                                                                                        |
| Selective reporting (reporting bias)                      | Low risk           | Only 2 outcomes mentioned in trials register, both reported plus many more. Registered Nov 2011, recruitment Nov 2011 to Aug 2016.    |
| Attention                                                 | Low risk           | Appeared similar                                                                                                                      |
| Compliance                                                | Low risk           | Median serum EPA rose in intervention but not in control                                                                              |
| Other bias                                                | Unclear risk       | Some changes in inclusion criteria (levels of TG included) during trial                                                               |

### Risk & Prevention 2013 <sup>127 128</sup>

**Methods** Evaluation of the Efficacy of n-3 PUFA in Subjects at High Cardiovascular Risk (Risk and Prevention) RCT, parallel, (n3 EPA+DHA vs MUFA), 60 months?  
Summary risk of bias: Moderate or high

**Participants** Patients with multiple cardiovascular risk factors  
N: 6244 int., 6269 control. (analysed, int: 6239 cont: 6266)  
Level of risk for CVD: high  
Male: 62.3% int., 60.6% control.  
Mean age (SD): 63.9 (9.3) int., 64.0 (9.6) control  
Age range: NR  
Smokers: 22.1% int., 21.4% control.  
Hypertension: 84.6% int., 84.5% control.  
Medications taken by at least 50% of those in the control group: NR  
Medications taken by 20-49% of those in the control group: ACE inhibitor; ARB; Diuretic agent; Calcium-channel blocker; Beta-blocker; Oral hypoglycaemic drug; Statin; Antiplatelet agent.  
Medications taken by some, but less than 20% of the control group: Insulin  
Location: Italy  
Ethnicity: NR

**Interventions** Type: supplement (n-3 capsules)  
Comparison: EPA & DHA vs MUFA  
Intervention: 1g/d n-3 capsules polyunsaturated fatty acid ethyl esters (EPA and DHA content 850-882 mg with an average ratio of 1.0 to 1.2): EPA+DHA 0.86g/d  
Control: 1g/d olive oil capsules  
Compliance: measured by self-report during follow up visits but no results reported.  
Duration of intervention: 60 months

**Outcomes** Main study outcome: composite of time to death from cardiovascular causes or hospital admission for cardiovascular causes  
Dropouts: Int., 5 (withdrew consent before baseline), 43 lost to follow-up, 1115 stopped treatment. 6239 analysed.  
Control: 3 (withdrew consent before baseline), 39 lost to follow-up, 1218 stopped treatment. 6266 analysed  
Available outcomes: mortality, CV mortality, CV events, coronary related events and mortality, MI, AF, heart failure, side effects, stroke, cancer diagnosis, cancer death. Authors provided data on which participants developed diabetes, glucose and HbA1c.

Response to author contact: yes

**Notes** All continuous outcomes change data are reported as LSM hence not used.  
 Study funding: "The steering committee had the full and sole responsibility for planning and coordinating the study, analyzing and interpreting the data, and preparing the manuscript and submitting it for publication. Società Prodotti Antibiotici, Pfizer, and Sigma Tau funded the trial but had no role in the study design, planning, conduct, or analysis or in the interpretation or reporting of the results"

**Risk of bias table**

| Bias                                                      | Authors' judgement | Support for judgement                                                                                                                                                                                                                                                                                                                                                                                                                                                                                                                                                                                                                                                                                                        |
|-----------------------------------------------------------|--------------------|------------------------------------------------------------------------------------------------------------------------------------------------------------------------------------------------------------------------------------------------------------------------------------------------------------------------------------------------------------------------------------------------------------------------------------------------------------------------------------------------------------------------------------------------------------------------------------------------------------------------------------------------------------------------------------------------------------------------------|
| Random sequence generation (selection bias)               | Low risk           | "Treatment was centrally assigned by means of telephone on the basis of a concealed, computer-generated randomization list, stratified according to general practitioner."                                                                                                                                                                                                                                                                                                                                                                                                                                                                                                                                                   |
| Allocation concealment (selection bias)                   | Low risk           | As above                                                                                                                                                                                                                                                                                                                                                                                                                                                                                                                                                                                                                                                                                                                     |
| Blinding of participants and personnel (performance bias) | Unclear risk       | "Patients, general practitioners, coordination and statistical staff, and outcome assessors were unaware of the study assignments until the final analyses were completed." However, there was no mention of placebo appearance or other methods of blinding, so unclear.                                                                                                                                                                                                                                                                                                                                                                                                                                                    |
| Blinding of outcome assessment (detection bias)           | Low risk           | "Patients, general practitioners, coordination and statistical staff, and outcome assessors were unaware of the study assignments until the final analyses were completed."<br>"All events included in the primary efficacy end point were documented with the use of a narrative summary and supporting documentation and were adjudicated on the basis of prespecified criteria by an ad hoc committee consisting of a cardiologist, an internist, and a neurologist who were unaware of the study assignments"                                                                                                                                                                                                            |
| Incomplete outcome data (attrition bias)                  | Low risk           | "Analyses were performed in the intention-to-treat population, except for a prespecified per protocol analysis of the primary end point in patients with no major protocol violations who did not permanently stop treatment." Figures differ in Visentin 2008: (p. i73) "At the end of March 2006, 12 521 patients have been Randomized"; ... "After 1-year of follow-up, 2.5% of the patients withdrawn from the trial and 5% of the patients discontinued treatment. The reasons for drug discontinuation were 1.7% for side effects (mainly gastrointestinal) and 3.3% others (clinical or patient's refusal)...After 1-year of follow-up, 1.0% had CV death and 3.4% hospitalization for CV events (primary end point)" |
| Selective reporting (reporting bias)                      | High risk          | Primary endpoint was amended part way through study. Differences in groupings of cardiovascular events in tables 2; S4 and S5. For hospital admissions notes each patient could have more than one cardiovascular cause                                                                                                                                                                                                                                                                                                                                                                                                                                                                                                      |
| Attention                                                 | Unclear risk       | Does not state attention differs or is the same between groups- regularly see GP for follow-up                                                                                                                                                                                                                                                                                                                                                                                                                                                                                                                                                                                                                               |
| Compliance                                                | Unclear risk       | No results                                                                                                                                                                                                                                                                                                                                                                                                                                                                                                                                                                                                                                                                                                                   |
| Other bias                                                | Low risk           | None noted                                                                                                                                                                                                                                                                                                                                                                                                                                                                                                                                                                                                                                                                                                                   |

**Rose 1965**<sup>23</sup>

**Methods** RCT, 2 arm parallel (n-6 LA vs MUFA), 24 months  
 Summary risk of bias: Moderate to high



**Participants** Patients with Ischaemic Heart Disease (IHD)  
 CVD risk: high  
 N: 28 int., 26 control (analysed 15 int., 12 control)  
 % male: NR  
 Mean age: 52.6 int., 55 control (no SDs)  
 Age range: NR  
 Smokers: NR  
 Hypertension: NR  
 Medications taken by at least 50% of those in the control group: NR  
 Medications taken by 20-49% of those in the control group: NR  
 Medications taken by some, but less than 20% of the control group: NR  
 Location: UK  
 Ethnicity: NR

**Interventions** Type: Dietary advice+ test oil provided  
 Comparison: n-6 vs MUFA  
 Intervention: 80 g/day corn oil to be taken in three equal doses at meal-times plus patients were instructed to avoid fried foods, fatty meat, sausages, pastry, ice-cream, cheese, cakes, milk, eggs, butter were restricted. Corn oil supplement of  
 Control: 80g/day olive oil plus patients were instructed to avoid fried foods, fatty meat, sausages, pastry, ice-cream, cheese, cakes, milk, eggs, butter were restricted: assuming 80% LA in corn oil, 64g/d LA  
 Compliance: measured based on the number of oil cans and patients' own statement. Mean intake was 64 g/day int., 58g/day control. However, this mean is only for people still in the trial.  
 Duration of intervention: 2 years

**Outcomes** Main study outcome: Occurrence of infraction  
 Dropouts: 6 int., 11 control?, details provided in table but unclear how many dropped out.  
 Available outcomes: major CVD events, MI (fatal & non-fatal), sudden death, diagnosis type 2 diabetes, serum cholesterol.  
 Response to contact: Not attempted as trial conducted in the 1960s

**Notes** Study funding: No details  
 The study had a third control arm (no intervention) which has not been used here.

### Risk of bias table

| Bias                                                      | Authors' judgement | Support for judgement                                                                                                                                                                                                 |
|-----------------------------------------------------------|--------------------|-----------------------------------------------------------------------------------------------------------------------------------------------------------------------------------------------------------------------|
| Random sequence generation (selection bias)               | Low risk           | When a new patient was accepted for the trial a sealed envelope was opened containing the allocation instructions. In the case of patients allocated to an oil group the instructions referred only to a code number. |
| Allocation concealment (selection bias)                   | Unclear risk       | As above, opacity of envelope unclear                                                                                                                                                                                 |
| Blinding of participants and personnel (performance bias) | Low risk           | The physicians in charge knew which patients were receiving oil, but they did not know until the end of the trial the kind of oil that they were receiving.                                                           |
| Blinding of outcome assessment (detection bias)           | Low risk           | The electrocardiograms were assessed without the knowledge of the patients treatment group                                                                                                                            |
| Incomplete outcome data (attrition bias)                  | Low risk           | 52% int., and 57% control remained in the trial after 24 months. However, the list of reasons and complications is provided.                                                                                          |
| Selective reporting (reporting bias)                      | Unclear risk       | No trial registry record or protocol found                                                                                                                                                                            |
| Attention                                                 | Low risk           | Both groups were given oil, and appear to have the same level of attention                                                                                                                                            |
| Compliance                                                | High risk          | Compliance poor; assessed by biomarkers                                                                                                                                                                               |
| Other bias                                                | Low risk           | None noted                                                                                                                                                                                                            |

### Rossing 1996 <sup>129 130</sup>

**Methods** RCT, parallel, (n3 EPA+DHA vs MUFA), 12 months  
 Summary risk of bias: Moderate or high

**Participants** Adults with insulin-dependent diabetes mellitus, diabetic nephropathy and normal BP

N: 18 int., 18 control. (analysed, 17 int, 15 cont)  
 Level of risk for CVD: moderate  
 Male: 64% int., 67% control.  
 Mean age (SD) years: 32 (7) int., 34 (10) control  
 Age range: 18-55 years  
 Smokers: 50% int., 47% control.  
 Hypertension: NR  
 Medications taken by at least 50% of those in the control group: insulin  
 Medications taken by 20-49% of those in the control group: NR  
 Medications taken by some, but less than 20% of the control group: NR  
 Location: Denmark  
 Ethnicity: NR

**Interventions** Type: supplement  
 Comparison: fish oil vs olive oil  
 Intervention: cod-liver oil emulsion (Pharma-Vinci A/S Denmark). EPA 2g, DHA 2.6g: EPA+DHA 4.6g/d  
 Control: olive oil emulsion (Pharma-Vinci A/S Denmark)  
 Compliance: assessed through omega 3 incorporation in platelets, and the paper reports significantly higher omega 3 levels in platelets at 12 months.  
 Duration of intervention: 12 months

**Outcomes** Main study outcome: diabetic nephropathy  
 Dropouts: 1 int., 3 control (though 3 further intervention participants are not included in all data)  
 Available outcomes: breast cancer, total & LDL cholesterol, systolic BP (TGs reported as medians so not used, albuminuria, fractional albumin clearance, transcapillary escape rate of albumin, prothrombin fragment reported as geometric means or medians, HbA1c, HDL and BP too different at baseline to include, GFR not relevant)  
 Response to contact: No

**Notes** Study funding: supported by The Danish Heart Association. Eskisol Fish oil and placebo oil emulsions were provided by Pharma-Vinci A/S, Frederiksvaerk, Denmark.

### Risk of bias table

| Bias                                                      | Authors' judgement | Support for judgement                                                                                                                                                                                                           |
|-----------------------------------------------------------|--------------------|---------------------------------------------------------------------------------------------------------------------------------------------------------------------------------------------------------------------------------|
| Random sequence generation (selection bias)               | Low risk           | "Patients were randomized using concealed randomization to receive either fish oil or olive oil in blocks of 4 according to their glomerular filtration rate."                                                                  |
| Allocation concealment (selection bias)                   | Unclear risk       | No further details                                                                                                                                                                                                              |
| Blinding of participants and personnel (performance bias) | Low risk           | "Active and placebo (olive oil) were given as emulsions with orange flavour. At the end patients were allowed to guess about treatment and ~50% were right"                                                                     |
| Blinding of outcome assessment (detection bias)           | Unclear risk       | No details.                                                                                                                                                                                                                     |
| Incomplete outcome data (attrition bias)                  | Low risk           | Drop outs similar between groups although relatively high for small sample size. 3 drop-outs from fish oil and 1 from control due to side effects. Intention to treat analysis appears to have been given for albuminuria only. |
| Selective reporting (reporting bias)                      | Unclear risk       | No trials registry entry or protocol found                                                                                                                                                                                      |
| Attention                                                 | Low risk           | Time and attention appear to be the same. All patients were given dietary advice.                                                                                                                                               |
| Compliance                                                | Low risk           | Reports significantly higher omega 3 levels in platelets at 12 months for the intervention group.                                                                                                                               |
| Other bias                                                | Low risk           | None noted                                                                                                                                                                                                                      |

### Sandhu 2016 <sup>131 132</sup>

**Methods** RCT, parallel 5 arms (only G1&4 are reported here), (n-3 EPA + DHA vs control), 24 months  
 Summary risk of bias: Moderate or high

**Participants** Healthy postmenopausal women (50% normal weight, 30% overweight, 20% obese) with high breast density detected on their routine screening mammograms

N: 54 int., 53 control. (analysed, int: 49 cont: 47)  
 Level of risk for CVD: low  
 Male: 0% int., 0% control.  
 Mean age (SD): 56.56 (6.9) int., 57.11 (5.9) control  
 Age range: NR  
 Smokers: 0% int., 0% control.  
 Hypertension: NR  
 Medications taken by at least 50% of those in the control group: NR  
 Medications taken by 20-49% of those in the control group: NR  
 Medications taken by some, but less than 20% of the control group: NR  
 Location: USA  
 Ethnicity: NR

**Interventions** Type: supplement (n-3 capsules)

Comparison: EPA & DHA vs nil

Intervention: Lovaza 4 g per day. Lovaza is the FDA-approved n-3FA formulation containing 465 mg of EPA & 375 mg of DHA per gram, total dose; 1860 mg/d EPA, 1500mg/d DHA

Control: No treatment

Compliance: measured by pill count, recorded at follow-up visits and further verified by serum fatty acids monitoring. Compliance was 94±2% (S.E.) at 6 months and 97±2% (S.E.) at 12 months. Only two subjects had a compliance <85% (84% and 81%).

Duration of intervention: 24 months

**Outcomes** Main study outcome: change in breast density.

Dropouts: 5 int., 6 control

Available outcomes: Cardiovascular events, breast cancer, lipids, dietary intake, plasma FAs, adverse events (including one incidence of hyperglycaemia)

Response to contact: Yes

**Notes**

The study had five arms: group 1, no treatment, control; group 2, raloxifene 60 mg orally daily; group 3, raloxifene 30 mg orally daily; group 4, Lovaza 4 g orally daily; and group 5, Lovaza 4g per day plus raloxifene 30mg orally daily. Data here is presented for groups 1 and 4.

Study funding: The authors thank GlaxoSmith Kline and Eli Lilly for their generous supply of Lovaza and raloxifene, respectively. This work has been funded by Susan G. Komen for the Cure, KG081632 (A. Manni) and pilot funds from the Penn State Hershey Cancer Institute (K. El-Bayoumy) (Sandhu 2016 Pg 281, Col 2)

**Risk of bias table**

| Bias                                                      | Authors' judgement | Support for judgement                                                                                                                                                                                                                                                                                                                                                                                                                                                                     |
|-----------------------------------------------------------|--------------------|-------------------------------------------------------------------------------------------------------------------------------------------------------------------------------------------------------------------------------------------------------------------------------------------------------------------------------------------------------------------------------------------------------------------------------------------------------------------------------------------|
| Random sequence generation (selection bias)               | Low risk           | Sandhu 2016 pg 276: 'each study participant was randomly assigned with equal probability to one of the following five groups. A block randomization scheme was used to ensure balance treatment allocation during the course of enrolment.'                                                                                                                                                                                                                                               |
| Allocation concealment (selection bias)                   | Unclear risk       | No description of concealment of allocation                                                                                                                                                                                                                                                                                                                                                                                                                                               |
| Blinding of participants and personnel (performance bias) | High risk          | Open label                                                                                                                                                                                                                                                                                                                                                                                                                                                                                |
| Blinding of outcome assessment (detection bias)           | High risk          | Open label                                                                                                                                                                                                                                                                                                                                                                                                                                                                                |
| Incomplete outcome data (attrition bias)                  | Low risk           | <20% lost over 2 years, detailed reasons provided, no suggestion these are unbalanced.                                                                                                                                                                                                                                                                                                                                                                                                    |
| Selective reporting (reporting bias)                      | High risk          | Biomarkers of oxidative stress (Urinary 8-(isoprostane) F-2α and 8OHdG, Lymphocyte 8-OHdG, DNA etheno adducts), Urinary 2-OHE1, 4-OHE1, and 16α-OHE1, Serum level of C-reactive protein and IL-6, Serum level of IGF-I and IGFBP-3, complete blood count mentioned in trial registry but not reported in Sandhu 2016. (More outcomes reported than in registry – diet, physical activity levels, adverse events). NCT00723398 First received: July 24, 2008, study start date March 2009. |
| Attention                                                 | Low risk           | Participants assessed at baseline, 1-year and 2-year follow-up                                                                                                                                                                                                                                                                                                                                                                                                                            |

|            |                |                                                                                                                                                                                                                                          |
|------------|----------------|------------------------------------------------------------------------------------------------------------------------------------------------------------------------------------------------------------------------------------------|
| Compliance | Unclear risk ▼ | Measured by pill count, recorded at follow-up visits and further verified by serum fatty acids monitoring. Compliance was 94±2% (S.E.) at 6 months and 97±2% (S.E.) at 12 months. Only two subjects had a compliance <85% (84% and 81%). |
| Other bias | Low risk ▼     | None noted                                                                                                                                                                                                                               |

## Sasaki 2012 <sup>133</sup>

|                      |                                                                                                                                                                                                                                                                                                                                                                                                                                                                                                                                                                                                                                                                  |
|----------------------|------------------------------------------------------------------------------------------------------------------------------------------------------------------------------------------------------------------------------------------------------------------------------------------------------------------------------------------------------------------------------------------------------------------------------------------------------------------------------------------------------------------------------------------------------------------------------------------------------------------------------------------------------------------|
| <b>Methods</b>       | RCT, parallel, (n3 EPA vs nil, both arms had statins), 6 months<br>Summary risk of bias: Moderate or high                                                                                                                                                                                                                                                                                                                                                                                                                                                                                                                                                        |
| <b>Participants</b>  | Type 2 diabetic patients with dyslipidaemia and statin treated<br>N: 15 int., 14 control. (analysed, int: 15 cont: 13)<br>Level of risk for CVD: Moderate<br>Male: 54% int., 46% control<br>Mean age (SD): 65.5 (5.4) int., 69.2 (7.7) control<br>Age range: NR<br>Smokers: 13% int., 21% control<br>Hypertension: NR<br>Medications taken by at least 50% of those in the control group: Statin<br>Medications taken by 20-49% of those in the control group: Sulfonylurea, metformin, insulin, ACE inhibitor or ARB, aspirin<br>Medications taken by some, but less than 20% of the control group: Calcium channel blocker<br>Location: Japan<br>Ethnicity: NR |
| <b>Interventions</b> | Type: supplement (EPA + statin or statin alone)<br>Comparison: EPA vs nil<br>Intervention: 1.8g/d purified EPA preparation (Epadel, Mochida Pharmaceutical Co. Ltd) + statin: EPA 1.8g/d<br>Control: Statin alone<br><b>PUFA Dose:</b> (intended) increase 1.8g/d EPA+DHA, <b>0.8%E n-3, 0.8%E PUFA</b><br>Compliance: NR<br>Duration of intervention: 6 months                                                                                                                                                                                                                                                                                                  |
| <b>Outcomes</b>      | Main study outcome: Endothelial outcome<br>Dropouts: 0 int., 1 control?<br>Available outcomes: BMI, glucose, HbA1c, lipids (LDL used)<br>Response to contact: No contact attempted                                                                                                                                                                                                                                                                                                                                                                                                                                                                               |
| <b>Notes</b>         | Data for triglycerides and HDL cholesterol not used due to baseline differences<br>Study funding: Self-funded                                                                                                                                                                                                                                                                                                                                                                                                                                                                                                                                                    |

### Risk of bias table

| Bias                                                      | Authors' judgement | Support for judgement                                                  |
|-----------------------------------------------------------|--------------------|------------------------------------------------------------------------|
| Random sequence generation (selection bias)               | Unclear risk ▼     | "randomly assigned"                                                    |
| Allocation concealment (selection bias)                   | Unclear risk ▼     | As above                                                               |
| Blinding of participants and personnel (performance bias) | Unclear risk ▼     | Not reported                                                           |
| Blinding of outcome assessment (detection bias)           | Unclear risk ▼     | Not reported                                                           |
| Incomplete outcome data (attrition bias)                  | Low risk ▼         | Low drop out with reason provided                                      |
| Selective reporting (reporting bias)                      | High risk ▼        | Appears secondary outcomes not reported and retrospectively registered |
| Attention                                                 | Unclear risk ▼     | Not reported and blinding unclear                                      |
| Compliance                                                | Unclear risk ▼     | Not reported                                                           |
| Other bias                                                | Low risk ▼         | None noted                                                             |

## Sawada 2016 <sup>134</sup>

**Methods** RCT, parallel, (n3 EPA vs nil), 6 months  
Summary risk of bias: Moderate or high

**Participants** Newly-diagnosed impaired glucose metabolism patients with coronary artery disease  
N: 59 int., 59 control. (analysed, int: 54 cont: 53)  
Level of risk for CVD: High  
Male: 81.5% int., 81.1% control.  
Mean age (SD): 67.8 (9.1) int., 68.9 (8.8) control  
Age range: NR  
Smokers: 9.3% int., 7.5% control  
Hypertension: 88.9% int., 92.5% control  
Medications taken by at least 50% of those in the control group: Statin, calcium channel blocker, ACEI/ARB; no anti-diabetics were allowed.  
Medications taken by 20-49% of those in the control group: NR  
Medications taken by some, but less than 20% of the control group: NR  
Location: Japan  
Ethnicity: NR

**Interventions** Type: supplement (EPA capsules or nil)  
Comparison: EPA vs nil  
Intervention: 2x capsules/d (including 1.8g/d EPA, EPADEL, Mochida Pharmaceutical Co Ltd): EPA 1.8g/d  
Control: "no EPA"  
**PUFA Dose:** (intended) increase 1.8g/d EPA, **0.8%E n-3, 0.8%E PUFA**  
Compliance: NR  
Duration of intervention: 6 months

**Outcomes** Main study outcome: Hyperglycaemia, hyperlipemia and endothelial dysfunction  
Dropouts: 5 int., 6 control  
Available outcomes: Type 2 diabetes and impaired glucose tolerance, glucose, HbA1c, HOMA, CRP, lipids, weight, BMI, (HOMA medians only, FPG not used due to baseline differences, BP 6 months not used)  
Response to contact: No contact attempted

**Notes** Study funding: No grant support for the present study but all authors declare that they have no competing interests

### Risk of bias table

| Bias                                                      | Authors' judgement | Support for judgement                                                                                          |
|-----------------------------------------------------------|--------------------|----------------------------------------------------------------------------------------------------------------|
| Random sequence generation (selection bias)               | Low risk           | Randomisation was performed by means of random, permuted blocks of four in sealed envelopes                    |
| Allocation concealment (selection bias)                   | High risk          | This study was open-label, single-blinded                                                                      |
| Blinding of participants and personnel (performance bias) | High risk          | Patients knew whether they were intervention or control and no placebo capsule mentioned for the control group |
| Blinding of outcome assessment (detection bias)           | Unclear risk       | NR                                                                                                             |
| Incomplete outcome data (attrition bias)                  | Low risk           | Drop outs balanced and less than 10% over 6 months                                                             |
| Selective reporting (reporting bias)                      | Low risk           | Registry outcomes reported                                                                                     |
| Attention                                                 | Low risk           | All patients saw a dietitian and treatment only differs by capsule                                             |
| Compliance                                                | Low risk           | EPA/AA ratio significantly increased in intervention group at 6 months                                         |
| Other bias                                                | Low risk           | None noted                                                                                                     |

### Schirmer 2007 <sup>135</sup>

**Methods** RCT, 2 arm, parallel (n6 GLA vs MUFA), 1 year  
Summary risk of bias: Moderate to high

**Participants** Formerly obese adults with a recent minimum weight loss of 12 kg, a current BMI of < 34, otherwise health.  
CVD risk: low

N: 23 int., 22 control (analysed only completers 13 int., 17 control)  
 % male: 8% int., 6% control.  
 Mean age: 44.2 (10.1) int., 52.6 (8.1) control  
 Age range: NR  
 Smokers: NR  
 Hypertension: 0%  
 Medications taken by at least 50% of those in the control group: Anorexigenic agent  
 Medications taken by 20-49% of those in the control group: NR  
 Medications taken by some, but less than 20% of the control group: NR  
 Location: USA  
 Ethnicity: NR

**Interventions** Type: supplement (capsule)  
 Comparison: n-6 (GLA) vs MUFA  
 Intervention: 5g/day of 500mg borage oil capsules providing 0.89g/d GLA.  
 Control: 5g/day of identical 500mg olive oil capsules.  
 Subjects in both groups were required to take a balanced multivitamin-mineral supplement daily, which included 80 mg of d-alpha-tocopherol.  
 Compliance: participants maintained daily intake records and measurement of adipose GLA.  
 Duration of intervention: 1 years (results reported only for participants completing a minimum of 50 weeks)

**Outcomes** Main study outcome: measures of adiposity  
 Dropouts: unclear, only one withdrew after randomisation but trial was terminated and only reported on 30/45 completers  
 Available outcomes: weight, fat weight. (Fasting blood glucose & blood pressure measured but not reported)  
 Response to contact: No

**Notes** Study funding: Supported in part by a gift from Shaklee Technica

### Risk of bias table

| Bias                                                      | Authors' judgement | Support for judgement                                                                                                                                                                                                                                  |
|-----------------------------------------------------------|--------------------|--------------------------------------------------------------------------------------------------------------------------------------------------------------------------------------------------------------------------------------------------------|
| Random sequence generation (selection bias)               | Unclear risk       | "Randomly assigned"                                                                                                                                                                                                                                    |
| Allocation concealment (selection bias)                   | Unclear risk       | No details                                                                                                                                                                                                                                             |
| Blinding of participants and personnel (performance bias) | Low risk           | "Both oil supplements were administered in a double-blind protocol as identical 500 mg capsules".                                                                                                                                                      |
| Blinding of outcome assessment (detection bias)           | Low risk           | "The initial study was terminated, and all remaining subjects were assessed over a 6-wk period. Unblinding revealed"... "the monitoring of their weights (simple ANOVA of group means while investigators and subjects remained unaware of treatment)" |
| Incomplete outcome data (attrition bias)                  | High risk          | "At the termination of the randomized placebo-controlled trial, 45 subjects remained in the study" Mentions one dropped out between randomisation & treatment commencement but no details/explanation of remaining drop outs/ non completers           |
| Selective reporting (reporting bias)                      | Unclear risk       | No protocol or trial register entry                                                                                                                                                                                                                    |
| Attention                                                 | Low risk           | Appears to be similar, both groups took capsules                                                                                                                                                                                                       |
| Compliance                                                | Low risk           | Adipose GLA was significantly higher in intervention group compared to control (P < 0.0001)                                                                                                                                                            |
| Other bias                                                | Low risk           | None noted                                                                                                                                                                                                                                             |

### Shimizu 1995 <sup>136</sup>

**Methods** RCT, parallel, (n3 EPA vs nil), 12 months  
 Summary risk of bias: Moderate or high

**Participants** Non-insulin dependent diabetic patients  
 N: 29 int., 16 control. (analysed, NR)  
 Level of risk for CVD: Moderate

Male: 34.5% int., 75% control  
 Mean age (SD): 66.3 (13.5) int., 58.6 (7.2) control  
 Age range: NR  
 Smokers: NR  
 Hypertension: 37.9% int., 43.8% control  
 Medications taken by at least 50% of those in the control group: Sulfonylurea  
 Medications taken by 20-49% of those in the control group: Insulin, antihypertensives  
 Medications taken by some, but less than 20% of the control group: NR  
 Location: Japan  
 Ethnicity: NR

**Interventions** Type: supplement (EPA-E capsules or nil)  
 Comparison: EPA vs nil  
 Intervention: 3 capsules/d (total 0.9g/d EPA, Mochida Pharmaceuticals): EPA 0.9g/d  
 Control: Unclear  
 Compliance: Capsule count (no data provided)  
 Duration of intervention: 12 months

**Outcomes** Main study outcome: Albuminuria  
 Dropouts: Unclear  
 Available outcomes: deaths (nil), CV events (nil), side effects (nil overall), BP, lipids, glucose, HbA1c (treated as not useable due to baseline differences)  
 Response to contact: Yes

**Notes** Data for lipids, glucose, HbA1c not used due to baseline differences, dropouts unclear  
 Study funding: NR

### Risk of bias table

| Bias                                                      | Authors' judgement | Support for judgement                                                          |
|-----------------------------------------------------------|--------------------|--------------------------------------------------------------------------------|
| Random sequence generation (selection bias)               | Unclear risk       | Each doctor picked up an envelope which contained a treatment group allocation |
| Allocation concealment (selection bias)                   | High risk          | Author response: Recruiters were aware of treatment allocation                 |
| Blinding of participants and personnel (performance bias) | High risk          | Author response: recipients and providers aware of treatment                   |
| Blinding of outcome assessment (detection bias)           | Unclear risk       | No details                                                                     |
| Incomplete outcome data (attrition bias)                  | Unclear risk       | NR                                                                             |
| Selective reporting (reporting bias)                      | Unclear risk       | No registry or protocol identified                                             |
| Attention                                                 | Unclear risk       | NR and no blinding                                                             |
| Compliance                                                | Unclear risk       | NR                                                                             |
| Other bias                                                | Low risk           | None noted                                                                     |

### SHOT - Eritsland 1996 <sup>137-146</sup>

**Methods** SHunt Occlusion Trial (SHOT)  
 RCT, parallel (n3 EPA+DHA vs nil), 4 arms, 1 year  
 Summary risk of bias: Moderate or high

**Participants** People admitted for coronary bypass grafting  
 N: 317 int., 293 control  
 Level of risk for CVD: High  
 Male: 86% int., 88 % control  
 Mean age (SD): 59.9 (8.7) int., 59.4 (8.8) control  
 Age range: Unclear  
 Smokers: 19% int., 20% control  
 Hypertension: 20% int., 25% control  
 Medications taken by at least 50% of those in the control group: NR  
 Medications taken by 20-49% of those in the control group: Antihypertensives.  
 Medications taken by some, but less than 20% of the control group: NR  
 Location: Norway  
 Ethnicity: NR

**Interventions** Type: supplement (capsule)  
 Comparison: EPA & DHA vs nil  
 Intervention: Omacor capsules, 4/d (3.3g EPA + DHA daily): EPA+DHA 3.3g/d  
 Control: nil  
 Compliance: capsule count, 88% taken, serum EPA + DHA rose in the intervention group (176 to 257 mg/L at 9 months) and fell in the control group (170 to 169 mg/L at 9 months)  
 Length of intervention: 12 months

**Outcomes** Main study outcome: CABG graft patency  
 Dropouts: 15 int., 14 control  
 Available outcomes: deaths, CV deaths, MI, stroke, repeat CABG, combined CV events, lipids, glucose, side effects (insulin data provided, but too different at baseline to use)  
 Response to contact: Yes

**Notes** The study had 4 arms; aspirin, warfarin, fish oil+ aspirin & warfarin+ fish oil. The first 2 groups are combined as the control and the last two combined as intervention.  
 Dietary assessment suggested total diet plus supplement intakes as follows: 2.7 g/d EPA + DHA at baseline, 5.5 g/d at 9 months int., 2.5g/d at baseline, 2.2g/d at 9 mo control group  
 Study funding: Funded in part by Pronova and Nycomed Pharma

**Risk of bias table**

| Bias                                                      | Authors' judgement | Support for judgement                                                                                                                                                                                                          |
|-----------------------------------------------------------|--------------------|--------------------------------------------------------------------------------------------------------------------------------------------------------------------------------------------------------------------------------|
| Random sequence generation (selection bias)               | Low risk           | Random numbers were provided in consecutively sealed envelopes generated centrally                                                                                                                                             |
| Allocation concealment (selection bias)                   | Unclear risk       | As above but envelopes not reported as opaque.                                                                                                                                                                                 |
| Blinding of participants and personnel (performance bias) | High risk          | Open trial, no blinding apart from outcome assessors so participants and study personnel were aware of assignments. However, author suggested in personal communication that participants were not aware of their assignments. |
| Blinding of outcome assessment (detection bias)           | Low risk           | Outcome assessors (radiologists) reported as blinded                                                                                                                                                                           |
| Incomplete outcome data (attrition bias)                  | Low risk           | Reasons for attrition and exclusions stated, numbers clear, dropouts <20% per year.                                                                                                                                            |
| Selective reporting (reporting bias)                      | Unclear risk       | No study protocol or trials register entry was found                                                                                                                                                                           |
| Attention                                                 | Low risk           | Appeared equivalent between arms                                                                                                                                                                                               |
| Compliance                                                | Low risk           | Capsule count, 88% taken, serum EPA + DHA rose in the intervention group (176 to 257 mg/L at 9 mo) and fell in the control group (170 to 169 mg/L at 9 mo)                                                                     |
| Other bias                                                | Low risk           | No further bias noted                                                                                                                                                                                                          |

**SMART Tapsell 2013** <sup>147-149</sup>

**Methods** SMART trial (from the Smart Foods Centre)  
 RCT, 3-arm parallel, (n3 EPA+DHA vs lower dose n3 EPA+DHA vs MUFA), 12 months  
 Summary risk of bias: Moderate or high

**Participants** Overweight adults  
 N: Fish +S int 41, Fish 43, control 42. (analysed, Fish +S int 21, Fish 25, control 18)  
 Level of risk for CVD: low  
 Male: 27% Fish + S int, 23% Fish int, 28% control.  
 Mean age (SD) years: unclear by arm, overall 45.1 (8.4)  
 Age range: NR but 18-60 years eligible  
 Smokers: NR but 5.9% overall  
 Hypertension: NR  
 Medications taken by at least 50% of those in the control group: NR  
 Medications taken by 20-49% of those in the control group: NR  
 Medications taken by some, but less than 20% of the control group: NR  
 Location: Australia  
 Ethnicity: NR

**Interventions** Type: supplement and food



Comparison: Fish plus fish oil supplements vs Fish plus olive oil supplements vs olive oil supplements  
 Intervention, Fish + S: hypocaloric diet aiming at 30%E from fat, 25%E from protein, 45%E from CHO, plus 180g fish/week plus capsules including 420mg/d EPA + 210mg/d DHA (Blackmores Promega Heart): EPA+DHA 0.63g/d plus fish  
 Intervention, Fish: hypocaloric diet aiming at 30%E from fat, 25%E from protein, 45%E from CHO, plus 180g fish/week plus capsules including 1g olive oil/d: EPA+DHA unclear  
 Control: hypocaloric diet aiming at 30%E from fat, 25%E from protein, 45%E from CHO, plus capsules including 1g olive oil/d  
 Compliance: Assessed through diet histories (fish) and erythrocyte fatty acid supplements (capsules), but results not reported  
 Duration of intervention: 12 months

**Outcomes** Main study outcome: total % body fat  
 Dropouts: Fish + Supplement int. 20, Fish int 18, control 24.  
 Available outcomes: weight, BMI, lipids, BP, fasting glucose, % body fat (leptin, TG, fasting insulin not used as only medians provided with IQ range)  
 Response to contact: Yes

**Notes** To assess effects of omega 3 fats the best comparison in this study is Fish + S vs Fish, so numerical data reflect this comparison. Study funding: Australian National Health and Medical Research Council, fish and olive oil capsules were provided free by Blackmores Australia

### Risk of bias table

| Bias                                                      | Authors' judgement | Support for judgement                                                                                                                                                                                                                                                                                                                                                                                                                                                                                                                                                                                                            |
|-----------------------------------------------------------|--------------------|----------------------------------------------------------------------------------------------------------------------------------------------------------------------------------------------------------------------------------------------------------------------------------------------------------------------------------------------------------------------------------------------------------------------------------------------------------------------------------------------------------------------------------------------------------------------------------------------------------------------------------|
| Random sequence generation (selection bias)               | Low risk           | "A researcher independent of the subject interface undertook the randomisation of participants into diet groups (stratified by sex and block randomised...)"                                                                                                                                                                                                                                                                                                                                                                                                                                                                     |
| Allocation concealment (selection bias)                   | Low risk           | "Randomisation was performed centrally, off-site and the holder of the allocation schedule provided the codes to a single researcher who was independent to the subject interface. The placebo and active ingredient capsules were coded off-site. The codes were kept from the researchers collecting dietary data and delivering treatment. Allocation concealment was maintained as the persons responsible for screening eligible participants for inclusion in the trial was unaware to which supplement group the subject would be allocated. Different dietitians collected the dietary data and provided dietary advice" |
| Blinding of participants and personnel (performance bias) | High risk          | As above, but impossible to blind participants to the fish advice                                                                                                                                                                                                                                                                                                                                                                                                                                                                                                                                                                |
| Blinding of outcome assessment (detection bias)           | Unclear risk       | As above                                                                                                                                                                                                                                                                                                                                                                                                                                                                                                                                                                                                                         |
| Incomplete outcome data (attrition bias)                  | Low risk           | Very high levels of attrition, though intention to treat analyses carried out.                                                                                                                                                                                                                                                                                                                                                                                                                                                                                                                                                   |
| Selective reporting (reporting bias)                      | High risk          | We were unable to find data on 24 hour energy expenditure, oxidation or heart rate which were stated as primary and secondary outcomes in the trials registry. ACTRN12608000425392 Trial registered 26/08/2008. Participants recruited between 8/07/2008-26/02/2009.                                                                                                                                                                                                                                                                                                                                                             |
| Attention                                                 | Unclear risk       | While dietary education was for 1 hour then six further half hour follow ups plus written materials and monthly newsletters plus dietary interviews it is not clear whether this was in all arms or only some of them.                                                                                                                                                                                                                                                                                                                                                                                                           |
| Compliance                                                | High risk          | "Of the 12 month completers, 57% were judged to be compliant, 39% (n = 7) for the control group who reported <180 g fish/week, 48% (n = 12) for the Fish group who reported ≥180 g fish/week, and 85% (n = 17) for the Fish + S group who reported ≥180 g fish/week or ≥90% supplements". However, erythrocyte (EPA+DHA)/total fatty acids x 100 was significantly different for the fish oil supplemented                                                                                                                                                                                                                       |

group compared to the two others - but it was only measured in around half of the participants as the others dropped out, so presumably were non-compliant.

Other bias

None noted.

## Smith 2015 <sup>150</sup>

**Methods** RCT, parallel, (n3 EPA+DHA vs n6 LA), 6 months  
Summary risk of bias: Moderate or high

**Participants** Healthy older adults  
N: 40 int., 20 control. (analysed, int: 29 cont: 15)  
Level of risk for CVD: low  
Male: 34% int., 33% control.  
Mean age (SD) years: 68 (5) int., 69 (7) control  
Age range: NR  
Smokers: NR  
Hypertension: NR  
Medications taken by at least 50% of those in the control group: NR  
Medications taken by 20-49% of those in the control group: NR  
Medications taken by some, but less than 20% of the control group: NR  
Location: USA  
Ethnicity: NR

**Interventions** Type: supplement  
Comparison: LCn3 vs n6  
Intervention: 4x1g/d capsules of n3 acid ethyl esters (Lovaza, GlaxoSmithKline, 1.86g/d EPA + 1.5g/d DHA, equivalent to 200-400g/d freshwater fish): EPA+DHA 3.36g/d  
Control: 4x1g/d capsules of corn oil (capsules looked identical to Lovaza capsules)  
Compliance: Assessed using pill count, participants were given excess pills and asked to return the remainder at study end. Mean compliance according to pills returned was 94% in intervention, 92% in control.  
Duration of intervention: 6 months

**Outcomes** Main study outcome: Muscle mass and function  
Dropouts: 11 of 40 int., 5 of 20 control  
Available outcomes: weight, body fat, intermuscular fat content, TG, HDL & LDL cholesterol, fasting glucose (glucose 2 hours post GTT, LFTs, BP not used)  
Response to contact: No contact attempted

**Notes** Study funding: NIH, Clinical Translational Science Award, study drugs were a gift from GlaxoSmithKline

### Risk of bias table

| Bias                                                      | Authors' judgement | Support for judgement                                                                                                                     |
|-----------------------------------------------------------|--------------------|-------------------------------------------------------------------------------------------------------------------------------------------|
| Random sequence generation (selection bias)               | Unclear risk       | "randomly assigned" - no further details                                                                                                  |
| Allocation concealment (selection bias)                   | Unclear risk       | As above                                                                                                                                  |
| Blinding of participants and personnel (performance bias) | Unclear risk       | Stated "double blind" and that capsules appeared identical. However no information provided as to their smell and taste.                  |
| Blinding of outcome assessment (detection bias)           | Unclear risk       | Stated "double blind" but no details as to method                                                                                         |
| Incomplete outcome data (attrition bias)                  | High risk          | 14 of 60 (27%) lost over 24 weeks                                                                                                         |
| Selective reporting (reporting bias)                      | Low risk           | Trials register entry made Feb 2011, study started June 2011 so prospective. Outcomes stated in trials register were all stated in paper. |
| Attention                                                 | Unclear risk       | Follow up schedule unclear                                                                                                                |
| Compliance                                                | Unclear risk       | Pill count suggests compliance with intervention and control capsules was greater than 90%                                                |
| Other bias                                                | Low risk           | None noted                                                                                                                                |

## Sofi 2010 <sup>151</sup>

|                      |                                                                                                                                                                                                                                                                                                                                                                                                                                                                                                        |
|----------------------|--------------------------------------------------------------------------------------------------------------------------------------------------------------------------------------------------------------------------------------------------------------------------------------------------------------------------------------------------------------------------------------------------------------------------------------------------------------------------------------------------------|
| <b>Methods</b>       | 2 arm, parallel RCT (n3 EPA+DHA vs MUFA), 12mo<br>Summary risk of bias: Moderate or high                                                                                                                                                                                                                                                                                                                                                                                                               |
| <b>Participants</b>  | Non-alcoholic fatty liver disease patients<br>N: 6 int., 5 control<br>Level of risk for CVD: low<br>Male: 66.7% int., 100 % control<br>Median age: 55 int., 54 control<br>Age range: 30-41 int., 42-70 control<br>Smokers: NR<br>Hypertension: NR<br>Medications taken by at least 50% of those in the control group: NR<br>Medications taken by 20-49% of those in the control group: NR<br>Medications taken by some, but less than 20% of the control group: NR<br>Location: Italy<br>Ethnicity: NR |
| <b>Interventions</b> | Type: supplement (oil)<br>Comparison: EPA & DHA vs MUFA<br>Intervention: 6.5 ml/d olive oil enriched with n-3 (t-Omega 3, tFarma srl, Italy) plus dietary recommendations. (0.83g n-3, 0.47g EPA, 0.24g DHA): EPA+DHA 0.71g/d<br>Control: 6.5 ml/d olive oil plus dietary recommendations<br>Compliance: was verified by counting the empty boxes on return but no data reported<br>Length of intervention: 12 months                                                                                  |
| <b>Outcomes</b>      | Main study outcome: Fatty liver status<br>Dropouts: unclear<br>Available Outcomes: lipids, glucose, insulin, HOMA, BMI (not in usable format)<br>Response to contact: No contact attempted                                                                                                                                                                                                                                                                                                             |
| <b>Notes</b>         | Study funding: Oil supplied by tFarma and funding not stated.                                                                                                                                                                                                                                                                                                                                                                                                                                          |

### Risk of bias table

| Bias                                                      | Authors' judgement | Support for judgement                                                                                                               |
|-----------------------------------------------------------|--------------------|-------------------------------------------------------------------------------------------------------------------------------------|
| Random sequence generation (selection bias)               | Unclear risk       | "The patients were randomized into two groups"                                                                                      |
| Allocation concealment (selection bias)                   | Unclear risk       | No details                                                                                                                          |
| Blinding of participants and personnel (performance bias) | Unclear risk       | No details                                                                                                                          |
| Blinding of outcome assessment (detection bias)           | Unclear risk       | No details                                                                                                                          |
| Incomplete outcome data (attrition bias)                  | Unclear risk       | Numbers analysed for liver health are for those randomised. Numbers analysed for other outcomes not stated. No mention of dropouts. |
| Selective reporting (reporting bias)                      | Unclear risk       | No protocol or trial registration                                                                                                   |
| Attention                                                 | Low risk           | Both groups received same contact                                                                                                   |
| Compliance                                                | Unclear risk       | Measured but no results reported                                                                                                    |
| Other bias                                                | Low risk           | None noted                                                                                                                          |

## Spadaro 2008 <sup>152</sup>

|                     |                                                                                                                                                                                                                                                                |
|---------------------|----------------------------------------------------------------------------------------------------------------------------------------------------------------------------------------------------------------------------------------------------------------|
| <b>Methods</b>      | RCT, parallel, (high LCn3s vs low LCn3s, not specific which LCn3s), 6 months<br>Summary risk of bias: Moderate or high                                                                                                                                         |
| <b>Participants</b> | People with non-alcoholic fatty liver disease (NAFLD)<br>N: 20 int., 20 control. (analysed, int: 18 cont: 18)<br>Level of risk for CVD: moderate<br>Male: 61% int., 44% control.<br>Mean age (SD) years: 50.2 (12.9) int., 51.3 (9.8) control<br>Age range: NR |

Smokers: NR  
 Hypertension: NR  
 Medications taken by at least 50% of those in the control group: NR  
 Medications taken by 20-49% of those in the control group: NR  
 Medications taken by some, but less than 20% of the control group: NR  
 Location: Italy  
 Ethnicity: NR

**Interventions** Type: supplement  
 Comparison: PUFA vs nil  
 Intervention: 2g/d PUFA (in capsule form), plus American Heart Association dietary advice (50%E CHO, 20%E protein, 30%E fats), overweight and obese participants were encouraged to lose weight by reducing total energy intake  
 Control: American Heart Association dietary advice (50%E CHO, 20%E protein, 30%E fats), overweight and obese participants were encouraged to lose weight by reducing total energy intake  
**n3 Dose:** (intended) increase 2.0g/d, **0.9%E n3**  
 Compliance: Evaluated using a questionnaire, no results presented  
 Duration of intervention: 6 months

**Outcomes** Main study outcome: fatty liver status  
 Dropouts: 2 int., 2 control  
 Available outcomes: lipids, TNF alpha, BMI, HOMA-IR (LFTs, degree of steatosis presented but not used)  
 Response to contact: No contact attempted

**Notes** Study funding: NS  
 Author contact: Not yet

### Risk of bias table

| Bias                                                      | Authors' judgement | Support for judgement                                                                                                         |
|-----------------------------------------------------------|--------------------|-------------------------------------------------------------------------------------------------------------------------------|
| Random sequence generation (selection bias)               | Unclear risk       | "randomly assigned into two study groups using random sampling numbers"                                                       |
| Allocation concealment (selection bias)                   | Unclear risk       | No further data                                                                                                               |
| Blinding of participants and personnel (performance bias) | High risk          | No placebo, open study                                                                                                        |
| Blinding of outcome assessment (detection bias)           | Unclear risk       | Unclear, not stated, though mostly biochemical outcomes                                                                       |
| Incomplete outcome data (attrition bias)                  | Low risk           | 2 lost of 20 from each arm, 10% lost in 6 months. Reasons given, balanced.                                                    |
| Selective reporting (reporting bias)                      | Unclear risk       | No protocol or trials register entry found                                                                                    |
| Attention                                                 | Low risk           | The study only differed by the additional capsules, but the assessment schedule was not stated to differ between the two arms |
| Compliance                                                | Unclear risk       | Not stated                                                                                                                    |
| Other bias                                                | Low risk           | None noted                                                                                                                    |

### Tande 2016 <sup>153</sup>

**Methods** 2 arm, parallel RCT (n3 EPA+DHA vs MUFA), 12mo  
 Summary risk of bias: Moderate or high

**Participants** Healthy male and female volunteers with BMI 25-35 kg/m<sup>2</sup>  
 N: 64 int., 63 control (50 int, 50 cont analysed)  
 Level of risk for CVD: low  
 Male: 42% int., 43 % control  
 Mean age (SD): 50.7 (7.7) int., 49 (9.4) control  
 Age range: Unclear (18 years and older)  
 Smokers: NR  
 Hypertension: NR  
 Medications taken by at least 50% of those in the control group: NR  
 Medications taken by 20-49% of those in the control group: NR  
 Medications taken by some, but less than 20% of the control group: NR

Location: Norway  
 Ethnicity: NR

**Interventions** Type: supplement (capsule)  
 Comparison: EPA & DHA vs MUFA  
 Intervention: 2 x 500 mg Calanus oil capsules twice daily 2g/d, Ayanda AS (Norway) blister packs of 60 capsules each. The Calanus oil contained approximately 85% wax ester with a sum of neutral lipids >90%: EPA+DHA and ALA unclear  
 Control: identical capsules of olive oil. Compositional analysis indicated that the fatty acid content of the olive oil was primarily oleic acid (76.9%), palmitic acid (10.2%), and linoleic acid (7.7%).  
 Compliance: assessed through the return of unused capsules. Compliance rate reported for both intervention and placebo groups was good (86-88%).  
 Length of intervention: 12 months

**Outcomes** Main study outcome: Safety of Calanus oil consumption  
 Dropouts: 14 int, 13 control.  
 Available Outcomes: BMI, waist-hip ratio, BP, pulse, HbA1c, ESR, CRP, lipids, glucose tolerance, insulin, clinical chemistry parameters, adverse events (authors report no cardiovascular events, deaths or diabetes diagnoses occurred)  
 Response to contact: Reply from authors, providing details of methodology

**Notes** Study funding: Funding was provided by Calanus AS.

**Risk of bias table**

| Bias                                                      | Authors' judgement | Support for judgement                                                                                                                                                                                                                                                                                                                                                                                                                                                                                                                                                                                                                                               |
|-----------------------------------------------------------|--------------------|---------------------------------------------------------------------------------------------------------------------------------------------------------------------------------------------------------------------------------------------------------------------------------------------------------------------------------------------------------------------------------------------------------------------------------------------------------------------------------------------------------------------------------------------------------------------------------------------------------------------------------------------------------------------|
| Random sequence generation (selection bias)               | Low risk           | "Randomization of the study subjects into the intervention group or the placebo group was performed by the University Hospital of North Norway clinical research unit and was stratified by gender." Author reply stated "Randomization was performed by competent people at the drugstore affiliated to the University Hospital, with no interconnection, formally or materially with the research department from where the study was managed. Randomization was performed prior to recruiting subjects."                                                                                                                                                         |
| Allocation concealment (selection bias)                   | Unclear risk       | As above, unclear                                                                                                                                                                                                                                                                                                                                                                                                                                                                                                                                                                                                                                                   |
| Blinding of participants and personnel (performance bias) | Low risk           | Subjects of the placebo group received identical capsules at similar daily doses as the intervention group. However no information provided as to their smell and taste. Also unclear if investigators were blinded. Author reply stated "Each study subject was given a randomization number, which carried the name of the person, date of birth and treatment information (intervention or control). The randomization number was the only information made available to the study personnel, and the code was managed by personnel outside the research department. This code was broken after the completion of all analysis with all primary data processed." |
| Blinding of outcome assessment (detection bias)           | Low risk           | As above                                                                                                                                                                                                                                                                                                                                                                                                                                                                                                                                                                                                                                                            |
| Incomplete outcome data (attrition bias)                  | Low risk           | All drop outs (~20%) are explained                                                                                                                                                                                                                                                                                                                                                                                                                                                                                                                                                                                                                                  |
| Selective reporting (reporting bias)                      | Unclear risk       | No trials registry entry or protocol found                                                                                                                                                                                                                                                                                                                                                                                                                                                                                                                                                                                                                          |
| Attention                                                 | Low risk           | Appear to be similar in both groups                                                                                                                                                                                                                                                                                                                                                                                                                                                                                                                                                                                                                                 |
| Compliance                                                | Unclear risk       | "levels of DHA and EPA in the blood were generally higher in the Calanus oil group over baseline values relative to the placebo controls" but no data provided                                                                                                                                                                                                                                                                                                                                                                                                                                                                                                      |
| Other bias                                                | Low risk           | None noted                                                                                                                                                                                                                                                                                                                                                                                                                                                                                                                                                                                                                                                          |

## TapSELL 2004 <sup>154 155</sup>

**Methods** RCT, parallel, (n3 ALA vs nil), 6 months  
Summary risk of bias: Moderate or high

**Participants** Patients with type 2 diabetes  
N: 17 int., 20 control. (analysed, int: 16 cont: 19)  
Level of risk for CVD: Moderate  
Male: 29.4% int., 64.7% control.  
Mean age (SD): 57.7 (9.0) int., 59.3 (7.1) control  
Age range: 35-75 years overall  
Smokers: NR  
Hypertension: NR  
Medications taken by at least 50% of those in the control group: NR  
Medications taken by 20-49% of those in the control group: NR  
Medications taken by some, but less than 20% of the control group: NR  
Location: Australia  
Ethnicity: NR

**Interventions** Type: supplemented food (walnuts + advice for modified low fat diet, or advice for modified low fat diet alone)  
Comparison: ALA vs nil  
Intervention: 30g/d walnuts + advice for modified low fat diet: ALA dose unclear  
Control: Advice for modified low fat diet only  
**PUFA Dose:** (intended) increase unclear  
Compliance: Diet history and 3-d food record  
Duration of intervention: 6 months

**Outcomes** Main study outcome: Cholesterol  
Dropouts: 1 int., 1 control  
Available outcomes: Mortality and cardiovascular events (nil), anthropometrics (not useable), lipids, HbA1c  
Response to contact: Yes

**Notes** Author confirmed no deaths or cardiovascular events  
Data for anthropometrics, total and LDL cholesterol not used due to baseline differences  
3 arm trial: Low fat (unmodified) arm not discussed here  
Study funding: California Walnut Commission

### Risk of bias table

| Bias                                                      | Authors' judgement | Support for judgement                                                                                       |
|-----------------------------------------------------------|--------------------|-------------------------------------------------------------------------------------------------------------|
| Random sequence generation (selection bias)               | Unclear risk       | "randomly allocated"                                                                                        |
| Allocation concealment (selection bias)                   | Unclear risk       | "randomly allocated"                                                                                        |
| Blinding of participants and personnel (performance bias) | High risk          | Open label                                                                                                  |
| Blinding of outcome assessment (detection bias)           | Unclear risk       | NR                                                                                                          |
| Incomplete outcome data (attrition bias)                  | Low risk           | Low drop out and balanced across arms                                                                       |
| Selective reporting (reporting bias)                      | Unclear risk       | No registry or protocol identified                                                                          |
| Attention                                                 | Unclear risk       | Unclear since open label (in low fat arm not discussed fully here, participants received fewer phone calls) |
| Compliance                                                | High risk          | Majority of p values for differences in fatty acid status >0.05                                             |
| Other bias                                                | Low risk           | None noted                                                                                                  |

## Tardivo 2015 <sup>156</sup>

**Methods** RCT, parallel, (n3 EPA+DHA vs nil), 6 months  
Summary risk of bias: Moderate or high

**Participants** Postmenopausal women with metabolic syndrome  
N: 44 int., 43 control. (analysed, int: 44 cont: 43 - paper states ITT analysis, but there were dropouts,

below)  
 Level of risk for CVD: moderate  
 Male: 0% int., 0% control.  
 Mean age (SD) years: 55.1 (6.6) int., 55.0 (7.3) control  
 Age range: NR but inclusion criteria were 45-70 years  
 Smokers: 21% overall (not reported by arm)  
 Hypertension: NR  
 Medications taken by at least 50% of those in the control group: NR  
 Medications taken by 20-49% of those in the control group: NR  
 Medications taken by some, but less than 20% of the control group: NR  
 Location: Brazil  
 Ethnicity: NR

**Interventions** Type: supplement  
 Comparison: EPA+DHA vs nil  
 Intervention: 3 capsules/d EPA+DHA (Proepa, Ache, providing 0.54g/d EPA plus 0.36g/d DHA with 6mg/d alpha-tocopherol) plus dietary advice on energy intake (encouraging weight loss for those overweight), with 5-6 meals/d, 45-60%E CHO, 10-35%E protein, 20-35%E fat, SFA<7%E, MUFA 10-15%E, individualised to usual dietary intake: EPA+DHA 0.9g/d  
 Control: dietary advice on energy intake (encouraging weight loss for those overweight), with 5-6 meals/d, 45-60%E CHO, 10-35%E protein, 20-35%E fat, SFA<7%E, MUFA 10-15%E, individualised to usual dietary intake.  
**PUFA Dose:** (intended) increase 0.9g/d EPA+DHA, **0.4%E n-3, 0.4%E PUFA**  
 Compliance: Assessed in intervention with count of returned capsule containers at each visit, but no results of this mentioned, not in control as no placebo used.  
 Duration of intervention: 6 months

**Outcomes** Main study outcome: metabolic and inflammatory markers  
 Dropouts: 11 of 44 int., 13 of 43 control  
 Available outcomes: waist circumference, body fat%, BMI, lipids, glucose, insulin, HOMA-IR, CRP, IL-6, TNF alpha (also IL-1beta, BP not used)  
 Response to contact: No contact attempted

**Notes** Funding: FAPESP - Fundação de Amparo a Pesquisa do Estado de São Paulo, Faculdade de Medicina de Botucatu da Universidade Estadual Paulista UNESP, Julio de Mesquita Filho

### Risk of bias table

| Bias                                                      | Authors' judgement | Support for judgement                                                                                      |
|-----------------------------------------------------------|--------------------|------------------------------------------------------------------------------------------------------------|
| Random sequence generation (selection bias)               | Low risk           | All given a number from 1 to 87, and randomised using a centralised computer (SAS)                         |
| Allocation concealment (selection bias)                   | Unclear risk       | Not reported                                                                                               |
| Blinding of participants and personnel (performance bias) | High risk          | Open trial, no placebo                                                                                     |
| Blinding of outcome assessment (detection bias)           | Unclear risk       | Not stated, biochemistry outcomes primarily                                                                |
| Incomplete outcome data (attrition bias)                  | High risk          | 11 of 44 in int, and 13 of 43 in control lost over 6 months (28%)                                          |
| Selective reporting (reporting bias)                      | Unclear risk       | RBR-5668v4 Registration Date: Feb, 3, 2013, Enrollment between 1/2/2011-22/12/2011. All outcomes reported. |
| Attention                                                 | Low risk           | Appointments were 2 monthly to review and encourage dietary changes                                        |
| Compliance                                                | Unclear risk       | Not reported                                                                                               |
| Other bias                                                | Low risk           | None noted                                                                                                 |

### THIS DIET 2008 <sup>157</sup>

**Methods** The Heart Institute of Spokane Diet Study (THIS DIET)  
 RCT- parallel (n3 EPA+DHA vs nil), 24 months  
 Summary risk of bias: Moderate or high

**Participants** Recent survivors of first myocardial infarction (within <6 weeks).  
 N: 51 int., 50 control.

Level of CVD risk: High  
 Male: 80% int., 68% control.  
 Mean age (SD): 58(10) int., 58 (9) control.  
 Age range: unclear  
 Smokers: 25% int., 30% control.  
 Hypertension: 43% int., 50% control (uncontrolled or secondary hypertension excluded)  
 Medications taken by at least 50% of those in the control group: Aspirin, statins, beta blockers, and ACE inhibitors or angiotensin receptor blockers.  
 Medications taken by 20-49%: NR  
 Medications taken by some, but <20%: NR  
 Location: USA  
 Ethnicity: int. 98% white race control 94% white race

**Interventions** Type: Dietary advice (to follow a Mediterranean style diet high in n-3)  
 Comparison: EPA & DHA vs placebo (unclear what)  
 Intervention: Mediterranean style diet high in n-3 (>0.75%E from omega 3 fats, unclear how much was EPA and DHA and how much was ALA). Dietary counselling group sessions; two in first month then at months 3, 6, 12 and 24. Sessions focused on behaviour modification and practical aspects of assigned diet including recipes, shopping and dining out: EPA+DHA dose unclear  
 Control: Dietary advice (to follow the American Heart Association Step II diet). Same number of group sessions as intervention.  
 The 2 diets were low in saturated fat (<7% kcal) and cholesterol (<200 mg/day); the Mediterranean-style diet was distinguished by greater omega-3 fat intake (>0.75% kcal).  
 Compliance: Participants were required to attend six sessions and only invited but not required to attend extra sessions. 3-day food diaries were reviewed with dietitians. Compliance results not stated.  
 Length of intervention: 24 months

**Outcomes** Main study outcome: a composite of end points including all-cause and cardiac death, MI, hospital admissions for HF, unstable angina, or stroke.  
 Dropouts: none for primary outcomes.  
 Available outcomes: total and CVD deaths (nil deaths), CV events, stroke, MI, diagnosis of DM, lipids, blood pressure, albuminuria, CRP, creatinine and dietary intake. (Authors supplied further data on newly diagnosed DM, glucose and insulin data, cancers, depression, atrial fibrillation, waist, BMI and weight, but BMI and weight too different at baseline to use)  
 Response to contact: yes, further data supplied as above

**Notes** The study compared the 2 intervention groups to a non-randomised usual care control group (not reported here)  
 Study funding: No funding details is provided but some reported conflict of interests for one of the the co-authors.

### Risk of bias table

| Bias                                                      | Authors' judgement | Support for judgement                                                                                                                                                                                                                                                                                                                                                 |
|-----------------------------------------------------------|--------------------|-----------------------------------------------------------------------------------------------------------------------------------------------------------------------------------------------------------------------------------------------------------------------------------------------------------------------------------------------------------------------|
| Random sequence generation (selection bias)               | Low risk           | Sealed envelopes concealing the allocation sequence were prepared by a research coordinator. Assignment was stratified by diabetes mellitus status using 10-envelope blocks. Envelopes were selected in the prepared order from a locked drawer by a study dietitian to assign interventions                                                                          |
| Allocation concealment (selection bias)                   | Unclear risk       | As above, but opacity of envelopes is not stated.                                                                                                                                                                                                                                                                                                                     |
| Blinding of participants and personnel (performance bias) | High risk          | Neither the intervention team nor participants could be blinded to dietary assignment.                                                                                                                                                                                                                                                                                |
| Blinding of outcome assessment (detection bias)           | Low risk           | The PI was blinded for the purpose of adjudicating clinical end points and adverse events by the removal of identifiers from records used for review.                                                                                                                                                                                                                 |
| Incomplete outcome data (attrition bias)                  | Low risk           | Primary outcomes data provided for all randomised                                                                                                                                                                                                                                                                                                                     |
| Selective reporting (reporting bias)                      | High risk          | NCT00269425 Trial was registered in 2005, data collection started in Oct 2000, January 2008 (Final data collection date for primary outcome measure), publication 2008. A number of the outcomes from the registration were not reported e.g. Cardiovascular revascularization, Peripheral revascularization or amputation, Doubling of serum creatinine, dialysis or |



kidney transplant, New hypertension. Also, numerous secondary measures were reported that were not in the original registration.

|            |              |                                               |
|------------|--------------|-----------------------------------------------|
| Attention  | Low risk     | Both arms had the same contact and attention. |
| Compliance | Unclear risk | No details                                    |
| Other bias | Low risk     | None noted                                    |

## Veleba 2015 <sup>158</sup>

**Methods** RCT, parallel, 2x2 (n3 EPA+DHA vs n6 LA, plus or minus pioglitazone), 6 months  
Summary risk of bias: Moderate or high

**Participants** Overweight/obese type 2 diabetic patients treated with metformin  
N: 17 n-3; 17 n-3 + Pio; 18 Pio; 17 control. (analysed, n-3: 16; n-3+Pio 14; Pio 17; cont: 13)  
Level of risk for CVD: Moderate  
Male: 66% in all groups combined  
Age median: 59.5 n-3; 60.5 n-3+Pio; 62.0 Pio; 62.0 control  
Smokers: NR  
Hypertension: NR  
Medications taken by at least 50% of those in the control group: Metformin  
Medications taken by 20-49% of those in the control group: NR  
Medications taken by some, but less than 20% of the control group: NR  
Location: Czech Republic  
Ethnicity: NR

**Interventions** Type: supplement (capsules with EPA+DHA; Pio+EPA+DHA; Pio alone; or corn oil)  
Comparison: EPA+DHA vs low EPA+DHA  
Intervention: **n-3 arm:** 5g/d omega-3 concentrate (including 0.75g/d EPA + 2g/d DHA, EPAX, Aalesund); EPA+DHA 2.75g/d  
**n-3+ pioglitazone arm:** as for n-3 + 15mg/d pioglitazone (Pio, Takeda): EPA+DHA 2.75g/d  
**Pio arm:** 15mg/d pioglitazone alone  
**Control:** 5g/d corn oil capsules (EPAX, Aalesund)  
**PUFA Dose:** (intended) increase 2.75g/d EPA+DHA, **1.2%E n-3, 1.2%E PUFA**  
Compliance: Serum omega-3 PhL index  
Duration of intervention: 24 weeks

**Outcomes** Main study outcome: Insulin sensitivity and triacylglycerol  
Dropouts: 1 n-3; 3 n-3+Pio; 1 Pio; 4 control  
Available outcomes: Insulin, weight, BMI, lipids, glucose, HbA1c, inflammatory markers (as medians and interquartile range)  
Response to contact: No contact attempted

**Notes** 4 arm trial, 2x2, omega 3 and pioglitazone interventions  
Study funding: Ministry of Health of the Czech Republic

### Risk of bias table

| Bias                                                      | Authors' judgement | Support for judgement                                                                                                                                          |
|-----------------------------------------------------------|--------------------|----------------------------------------------------------------------------------------------------------------------------------------------------------------|
| Random sequence generation (selection bias)               | Low risk           | "Randomization was performed using a computer-based algorithm arranging experimental units in blocks of four"                                                  |
| Allocation concealment (selection bias)                   | Unclear risk       | "The randomization code was kept secret and revealed after the clean-file procedure had been completed when all data had been filled in the case report forms" |
| Blinding of participants and personnel (performance bias) | Unclear risk       | "double blind"                                                                                                                                                 |
| Blinding of outcome assessment (detection bias)           | Unclear risk       | "double blind"                                                                                                                                                 |
| Incomplete outcome data (attrition bias)                  | High risk          | Drop out >20% in the control arm                                                                                                                               |
| Selective reporting (reporting bias)                      | High risk          | EudraCT 2009-011106-42. Unclear if prospectively registered. Registered on 26/05/2009. Some outcomes not reported e.g. liver and muscle                        |

(musculus tibialis) fat content, body fat distribution: fat quantity in different departments (subcutaneous, visceral)

|            |              |                                                                        |
|------------|--------------|------------------------------------------------------------------------|
| Attention  | Unclear risk | No specific statement and blinding unclear (open for pioglitazone arm) |
| Compliance | Low risk     | Serum omega-3 PhL index significantly increased in response to omega-3 |
| Other bias | Low risk     | None noted                                                             |

## Vijayakumar 2014 <sup>17 159 160</sup>

**Methods** RCT, 2 arms, parallel (n6 LA vs SFA), 2 years  
Summary risk of bias: Moderate or High

**Participants** People with stable coronary artery disease  
CVD risk: high  
Intervention (sunflower oil): 100 randomised, analysed at 2 years 94  
Control (coconut oil): 100 randomised, analysed at 2 years 96  
Mean years in trial: 2  
% male: Int 92.9%, Cont 93.9%  
Age, mean (SD) years: Int 59.0 (8.9), Cont 59.0 (8.4)  
Age range: unclear  
Smokers, ex: Int 57.1%, Cont 54.1%  
Hypertension: Int 55.1%, 58.2%  
Medications taken by at least 50% of those in the control group: statins  
Medications taken by 20-49% of those in the control group: NR  
Medications taken by some, but less than 20% of the control group: fibrates, nicotinic acid  
Location: India  
Ethnicity: NR

**Interventions** Type: Supplement (cooking oil)  
Comparison: sunflower oil (n6) vs coconut oil (SFA)  
Intervention aims: whole family to use branded sunflower oil for cooking (15%E provided in form of sunflower oil)  
Control aims: whole family to use branded coconut oil for cooking (15%E provided in form of coconut oil)  
**Dose:** increase 15%E n-6  
Baseline n-6: unclear  
Compliance: unclear  
Duration of intervention: 2 years

**Outcomes** Main study outcome: cardiovascular risk factors  
Dropouts: Int 6 lost, Cont 4 lost  
Available outcomes: lipids, death, re-vascularisation, (glycaemic control, weight, BMI available but unbalanced at baseline)  
Response to contact: yes, authors supplied outcome and methodological information

**Notes** Study funding: Coconut development board, Amrita Institute of Medical Science and Research.  
Sponsors had no role in study design or analysis.

### Risk of bias table

| Bias                                                      | Authors' judgement | Support for judgement                                         |
|-----------------------------------------------------------|--------------------|---------------------------------------------------------------|
| Random sequence generation (selection bias)               | Low risk           | Block randomisation with 5 blocks of 40                       |
| Allocation concealment (selection bias)                   | Unclear risk       | Unclear                                                       |
| Blinding of participants and personnel (performance bias) | Unclear risk       | Unlikely as participants and their families used branded oils |
| Blinding of outcome assessment (detection bias)           | Unclear risk       | Unclear                                                       |
| Incomplete outcome data (attrition bias)                  | Low risk           | 5% withdrawals. Clear, with reasons                           |
| Selective reporting (reporting bias)                      | Unclear risk       | Unclear, no protocol or trials register entry found           |
| Attention                                                 | Low risk           | Unlikely as cooking oil was the intervention, and             |

assessments appeared similarly timed

|            |                                           |            |
|------------|-------------------------------------------|------------|
| Compliance | <input type="text" value="Unclear risk"/> | NR         |
| Other bias | <input type="text" value="Low risk"/>     | None noted |

## Wang 2016 <sup>161</sup>

**Methods** RCT, parallel, (n3 EPA+DHA vs n6 LA), 6 months  
Summary risk of bias: Moderate or high

**Participants** Type 2 diabetic patients with abdominal obesity  
N: 50 int., 50 control. (analysed, int: 49 cont: 50)  
Level of risk for CVD: Moderate  
Male: 30.6% int., 40% control.  
Mean age (SD): 64.6 (5.5) int., 66.3 (5.1) control  
Age range: 60 years plus  
Smokers: NR  
Hypertension: NR  
Medications taken by at least 50% of those in the control group: Oral agents  
Medications taken by 20-49% of those in the control group: Insulin, anti-hypertensives  
Medications taken by some, but less than 20% of the control group: NR  
Location: China  
Ethnicity: Chinese

**Interventions** Type: supplement (capsules with EPA+DHA or corn oil)  
Comparison: Fish oil vs corn oil  
Intervention: 4x1g fish oil capsules/d (containing 1.34g EPA + 1.07g DHA, By-Health Co. China):  
EPA+DHA 2.41g/d  
Control: 4x1g corn oil capsules/d  
Compliance: Monthly check-ins and returning empty bottles. Serum fatty acid composition at baseline and trial end  
Duration of intervention: 6 months

**Outcomes** Main study outcome: Glycaemic control and dyslipidaemia  
Dropouts: 1 int., 0 control  
Available outcomes: Anthropometrics, lipids, glucose, HbA1c, insulin, HOMA-IR (insulin and HOMA not used due to baseline differences; BP 6mths only)  
Response to contact: No contact attempted

**Notes** Study funding: Grant from the National Natural Science Foundation of China, the nutrition research foundation from the Chinese Nutrition Society, the Fundamental Research Funds for the Central Universities, and the Graduate Research and Innovation Projects of Colleges in Jiangsu Province.  
Commercial supply of capsules

### Risk of bias table

| Bias                                                      | Authors' judgement                        | Support for judgement                                                                                                           |
|-----------------------------------------------------------|-------------------------------------------|---------------------------------------------------------------------------------------------------------------------------------|
| Random sequence generation (selection bias)               | <input type="text" value="Low risk"/>     | Random numbers were generated through the statistics software of SAS PROC PLAN procedure programming                            |
| Allocation concealment (selection bias)                   | <input type="text" value="Unclear risk"/> | Both participants and investigators were blinded for treatment allocation until the completion of the final data analysis       |
| Blinding of participants and personnel (performance bias) | <input type="text" value="Low risk"/>     | Identical-looking capsules and participants were asked to swallow the whole capsules before their main meals to avoid unmasking |
| Blinding of outcome assessment (detection bias)           | <input type="text" value="Unclear risk"/> | Both participants and investigators were blinded for treatment allocation until the completion of the final data analysis       |
| Incomplete outcome data (attrition bias)                  | <input type="text" value="Low risk"/>     | Low drop out (1 participant with reason)                                                                                        |
| Selective reporting (reporting bias)                      | <input type="text" value="High risk"/>    | C-reactive protein not reported                                                                                                 |
| Attention                                                 | <input type="text" value="Low risk"/>     | Participant seen at the same points and asked to maintain stable diet, medications and physical activity                        |

|            |            |                                                                     |
|------------|------------|---------------------------------------------------------------------|
| Compliance | Low risk ▼ | Significant increase in serum EPA and DHA in the intervention group |
| Other bias | Low risk ▼ | None noted                                                          |

## WELCOME 2014 <sup>162-166</sup>

**Methods** Wessex Evaluation of Fatty Liver and Cardiovascular Markers in NAFLD with Omacor Therapy (WELCOME)  
 RCT, parallel, (n3 EPA+DHA vs MUFA), 15-18 months  
 Summary risk of bias: Low

**Participants** Patients with NAFLD  
 N: 51 int., 52 control. (analysed, 47 int., 48 control)  
 Level of risk for CVD: Moderate  
 Male: 49% int., 67% control.  
 Mean age (SD): 48.6 (11.1) int., 54 (9.6) control.  
 Age range: NR (18-75 inclusion criteria)  
 Smokers: 14.3% int., 11.8% control.  
 Hypertension: NR  
 Medications taken by at least 50% of those in the control group: lipid lowering drugs  
 Medications taken by 20-49% of those in the control group: Anti-hypertensives, metformin (data not provided by group)  
 Medications taken by some, but less than 20% of the control group: None reported  
 Location: UK  
 Ethnicity: NR

**Interventions** Type: supplement (Omacor capsules)  
 Comparison: DHA & EPA vs MUFA  
 Intervention: 4g OMACOR per day (providing 1.84g EPA, 1.52 g DHA as ethyl esters)]; EPA+DHA 3.36g/d  
 Control: 4g olive oil capsules/ day (providing; ALA1%,Oleic acid 67%, palmitic acid 15%, stearic acid 2%, n-6 fat: 15%)  
 Compliance: was assessed by recording the returned unused capsules and quantification of erythrocyte EPA & DHA enrichment (a prespecified threshold of 2% for DHA & threshold of 0.7% for EPA enrichment)  
 Duration of intervention: 15-18 months

**Outcomes** Main study outcome: Changes in mean liver fat %, changes in two liver fibrosis scores, change in serum biomarkers  
 Dropouts: 4 int., 4 control  
 Available outcomes: weight, BMI, lipids, blood pressure, glucose, insulin sensitivity, body fat measures, liver enzymes, HbA1c, serum n-3 FAs, authors provided details of diabetes diagnoses, %body fat, BP and carotid intima media thickness. HbA1c not used (baseline differences)  
 Response to contact: Yes

**Notes** Study funding: Omacor and placebo were provided by Pronova Biopharma through Abbott Laboratories, Southampton, UK. This work was supported by a National Institute for Health Research (NIHR) Southampton Biomedical Research Unit grant and by a Diabetes UK allied health research training fellowship awarded to KGM (Diabetes UK. BDA 09/ 0003937). CDB, PCC and ES are supported in part by the NIHR Southampton Biomedical Research Centre (McCormick-2015, p9)

### Risk of bias table

| Bias                                        | Authors' judgement | Support for judgement                                                                                                                                                                                                                                                                                                                                                                                                                                                                                                                                                                                                           |
|---------------------------------------------|--------------------|---------------------------------------------------------------------------------------------------------------------------------------------------------------------------------------------------------------------------------------------------------------------------------------------------------------------------------------------------------------------------------------------------------------------------------------------------------------------------------------------------------------------------------------------------------------------------------------------------------------------------------|
| Random sequence generation (selection bias) | Low risk ▼         | Participants were block randomised by an independent clinical trials pharmacist to treatment with identical capsules by mouth of either n-3 fatty acid ethyl esters (4 g/day Omacor; Pronova, Sandefjord, Norway) or placebo (4 g/day olive oil) for a minimum of 15 months and a maximum of 18 months (McCormick-2015, p2).<br>Patients were randomised according to standardized procedures (computerized block randomisation) by a research pharmacist at University Hospital Southampton NHS Foundation Trust. Simple randomisation in blocks of four, either to trial medication or placebo was used. (Scorletti-2014, p2) |

|                                                           |              |                                                                                                                                                                                                                                                                                                                                                                                                                                                                                                                                                                                                                                                                                                                                                            |
|-----------------------------------------------------------|--------------|------------------------------------------------------------------------------------------------------------------------------------------------------------------------------------------------------------------------------------------------------------------------------------------------------------------------------------------------------------------------------------------------------------------------------------------------------------------------------------------------------------------------------------------------------------------------------------------------------------------------------------------------------------------------------------------------------------------------------------------------------------|
| Allocation concealment (selection bias)                   | Low risk     | Participants were block randomised by an independent clinical trials pharmacist to treatment with identical capsules by mouth of either n-3 fatty acid ethyl esters (4 g/day Omacor; Pronova, Sandefjord, Norway) or placebo (4 g/day olive oil) for a minimum of 15 months and a maximum of 18 months (McCormick-2015, p2). Only the clinical trials pharmacist was unblinded, and randomisation group allocation was concealed from all study members throughout the trial. (McCormick-2015, p2).                                                                                                                                                                                                                                                        |
| Blinding of participants and personnel (performance bias) | Low risk     | Paper states that only the clinical trials pharmacist was unblinded, and randomisation group allocation was concealed from all study members throughout the trial. However, the trial register record states "single blind (investigator)". Although the capsules were identical, no information provided as to their smell and taste.                                                                                                                                                                                                                                                                                                                                                                                                                     |
| Blinding of outcome assessment (detection bias)           | Low risk     | As above                                                                                                                                                                                                                                                                                                                                                                                                                                                                                                                                                                                                                                                                                                                                                   |
| Incomplete outcome data (attrition bias)                  | Low risk     | The ITT analysis included all patients randomized who had complete data (baseline and end-of-study measurements), regardless of whether they were later found to be ineligible, a protocol violator, given the wrong treatment allocation, or never treated). (Scorletti 2014, p4)                                                                                                                                                                                                                                                                                                                                                                                                                                                                         |
| Selective reporting (reporting bias)                      | Unclear risk | Prospectively registered Sept 2008, study start Sept 2009, end Feb 2017. Outcome data for cardiac function not yet published (but expected soon, study only completed in Feb 2017) though other cardiovascular measures reported.                                                                                                                                                                                                                                                                                                                                                                                                                                                                                                                          |
| Attention                                                 | Low risk     | Both groups had the same attention                                                                                                                                                                                                                                                                                                                                                                                                                                                                                                                                                                                                                                                                                                                         |
| Compliance                                                | Low risk     | Almost 90% reached compliance threshold. Was assessed by recording the returned unused capsules and quantification of erythrocyte EPA & DHA enrichment (prespecified threshold of 2% for DHA & threshold of 0.7% for EPA enrichment)" Enrichment was highly variable in the intervention group, 5 and 6 participants did not reach the prespecified threshold for EPA and DHA enrichment, respectively. In the placebo group, we expected no enrichment between baseline and end of study, but 3 and 4 participants reached the thresholds set for the DHA +EPA group, for EPA and DHA, respectively (Fig. 2). One participant in the placebo group admitted to taking cod liver oil during the study and another markedly increased consumption of fish." |
| Other bias                                                | Low risk     | None noted                                                                                                                                                                                                                                                                                                                                                                                                                                                                                                                                                                                                                                                                                                                                                 |

## Witte 2012 <sup>167-169</sup>

**Methods** RCT, parallel, (n3 EPA+DHA vs n6 LA), 6 months  
Summary risk of bias: Moderate or high

**Participants** Healthy older adults (aged 50 to 80 years)  
N: 40 int., 40 control. (analysed, int: 32 cont: 33)  
Level of risk for CVD: low  
Male: 53% int., 55% control.  
Mean age (SD): 65 (6.3) int., 62.9 (6.8) control  
Age range: int 51-75 years, cont 50-75 years  
Smokers: NR  
Hypertension: NR  
Medications taken by at least 50% of those in the control group: NR  
Medications taken by 20-49% of those in the control group: NR  
Medications taken by some, but less than 20% of the control group: NR  
Location: Germany

Ethnicity: NR

**Interventions** Type: supplement

Comparison: fish oil capsules vs sunflower oil capsules

Intervention: fish oil capsules, 4 capsules/d (including 1.32g/d EPA plus 0.88g/d DHA, provided by Via Vitamine), and advised not to change usual dietary habits: EPA+DHA 2.2g/d

Control: sunflower oil capsules, 4 capsules/d (provided by Via Vitamine), identical in shape and colour, and advised not to change usual dietary habits

Compliance: compliance assessed by capsule counts, questionnaire, and omega 3 index in erythrocyte membrane, capsule count suggested missed capsules were <5%

Duration of intervention: 6 months

**Outcomes** Main study outcome: brain function

Dropouts: 7 of 40 int., 6 of 40 control

Available outcomes: glucose, HbA1c, hsCRP, TNF alpha, IL-6, BMI, TG, cognition including executive function, memory, sensorimotor speed, attention and mood (there were no deaths in either arm, weight, % body fat, insulin and serum total cholesterol were too different at baseline to use, BP data not used as only 6 mo, MRI imaging data, carotid intima media thickness not used)

Response to contact: No contact attempted

**Notes** There was a 3rd arm to this study, testing calorie restriction - we have not used these data.

Study funding: Deutsche Forschungsgemeinschaft, Else-Kroner Fresenius Stiftung, Bundesministerium fur Bildung und Forschung. Capsules provided by Via Vitamine.

### Risk of bias table

| Bias                                                      | Authors' judgement | Support for judgement                                                                                                                                                     |
|-----------------------------------------------------------|--------------------|---------------------------------------------------------------------------------------------------------------------------------------------------------------------------|
| Random sequence generation (selection bias)               | Low risk           | "block randomisation"                                                                                                                                                     |
| Allocation concealment (selection bias)                   | Unclear risk       | Not described                                                                                                                                                             |
| Blinding of participants and personnel (performance bias) | Unclear risk       | "subjects and investigators were blinded to the treatment group" and capsules described as identical in shape and colour but no information provided as to taste or smell |
| Blinding of outcome assessment (detection bias)           | Low risk           | As above                                                                                                                                                                  |
| Incomplete outcome data (attrition bias)                  | Low risk           | Less than 20% lost to follow up, loss similar in each arm and described                                                                                                   |
| Selective reporting (reporting bias)                      | Low risk           | Trials register entry Oct 2009, data collection started Nov 2009. All outcomes mentioned in trials register, and many more, reported in publications.                     |
| Attention                                                 | Low risk           | No suggestion of difference between arms                                                                                                                                  |
| Compliance                                                | Low risk           | Appears to be a statistically significant difference between arms in omega 3 index at study end                                                                           |
| Other bias                                                | Low risk           | None noted                                                                                                                                                                |

### Zheng 2016 <sup>170-172</sup>

**Methods** RCT, parallel, (n3 EPA+DHA vs n3 ALA vs n6 LA), 6 months

Summary risk of bias: Moderate or high

**Participants** People with type 2 diabetes mellitus

N: 63 fish oil int., 61 flaxseed oil int, 61 control. (analysed, 58 fish oil int., 53 flaxseed oil int, 55 control)

Level of risk for CVD: moderate

Male: 33% fish oil int., 60% flaxseed oil int, 48% control

Mean age (SD) years: 59.7 (8.8) fish oil int., 59.7 (11.1) flaxseed oil int, 59.1 (10.0) control

Age range: men 35-80 years, women menopause to 80 years (inclusion criteria)

Smokers: NR

Hypertension: NR

Medications taken by at least 50% of those in the control group: diabetic medication

Medications taken by 20-49% of those in the control group: NR

Medications taken by some, but less than 20% of the control group: NR

Location: China

Ethnicity: NR

**Interventions** Type: supplement

Comparison: fish oil (LCn3) vs flaxseed oil (ALA) vs corn oil (n6)

Fish oil Intervention: 4 capsules/d fish oil (1.2g/d EPA, 0.8g/d DHA), Neptunus Bioengineering: EPA+DHA 2.0g/d

Flaxseed oil Intervention: 4 capsules/d flaxseed oil (2.5g/d ALA), Neptunus Bioengineering: ALA 2.5g/d

Control: 4 capsules/d corn oil (2.1g/d LA), Neptunus Bioengineering

Compliance: evaluated by measurement of erythrocyte phospholipid fatty acid compositions at baseline and end, counting empty bottles returned to study centres at days 90 and 180, and monthly phone contact. Sig diff of EPA and DHA between fish oil and corn oil groups at 6 months, and of ALA between flaxseed oil and corn oil at 6 months.

Duration of intervention: 6 months

**Outcomes** Main study outcome: insulin resistance

Dropouts: 5 of 63 fish oil int., 8 of 61 flaxseed oil int, 6 of 61 control

Available outcomes: glucose, insulin, HbA1c, HOMA, lipids (some unbalanced at baseline so not used, liver and renal function markers not used)

Response to contact: No contact attempted

**Notes**

Study funding: National Basic Research Program of China, National Natural Science Foundation of China, Ph.D. Programs Foundation of Ministry of Education of China, Cambridge Initiative – Nutrition.

**Risk of bias table**

| Bias                                                      | Authors' judgement | Support for judgement                                                                                                                                                                                                                                                                                                                                                                                                                                                                                                                           |
|-----------------------------------------------------------|--------------------|-------------------------------------------------------------------------------------------------------------------------------------------------------------------------------------------------------------------------------------------------------------------------------------------------------------------------------------------------------------------------------------------------------------------------------------------------------------------------------------------------------------------------------------------------|
| Random sequence generation (selection bias)               | Low risk           | "randomly allocated to one of the three treatments by computer-generated random numbers with a block size of six, allocation sequence generated by J.S.Z."                                                                                                                                                                                                                                                                                                                                                                                      |
| Allocation concealment (selection bias)                   | Unclear risk       | "Doctors/nurses at each study centre enrolled and assigned participants to the intervention groups"                                                                                                                                                                                                                                                                                                                                                                                                                                             |
| Blinding of participants and personnel (performance bias) | Unclear risk       | Capsules had "identical appearance", standardised to 1g each, study reported as "double blind". "All the patients were given four bottles of capsules at baseline, and given another four bottles at 90 days"... "None of the participants or the nurses/physicians in the study centers knew the oil types during the intervention."... "capsules were kept in white bottles (90 capsules/bottle), which were labelled as Oil A, Oil B, and Oil C for the three types of capsules." No attempt mentioned to mask flavour or smell of fish oil. |
| Blinding of outcome assessment (detection bias)           | Low risk           | "None of the participants or the nurses/physicians in the study centers knew the oil types during the intervention" and outcomes biochemical.                                                                                                                                                                                                                                                                                                                                                                                                   |
| Incomplete outcome data (attrition bias)                  | Unclear risk       | Clear about numbers and time of dropout, but no reasons. Attrition <20% each arm.                                                                                                                                                                                                                                                                                                                                                                                                                                                               |
| Selective reporting (reporting bias)                      | Low risk           | Only insulin resistance mentioned in trials register entry (registered before participant recruitment), but many other outcomes reported.                                                                                                                                                                                                                                                                                                                                                                                                       |
| Attention                                                 | Low risk           | Appears similar across groups                                                                                                                                                                                                                                                                                                                                                                                                                                                                                                                   |
| Compliance                                                | Low risk           | Sig diff of EPA and DHA between fish oil and corn oil groups at 6 months, and of ALA between flaxseed oil and corn oil at 6 months.                                                                                                                                                                                                                                                                                                                                                                                                             |
| Other bias                                                | Low risk           | None noted.                                                                                                                                                                                                                                                                                                                                                                                                                                                                                                                                     |

**Footnotes**

ALA = alpha-linolenic acid

BMI = body mass index

BP = blood pressure

CABG = coronary artery bypass grafting

CHD = coronary heart disease

chol = cholesterol

CVD = cardiovascular disease  
DBP = diastolic blood pressure  
DHA = docosahexaenoic acid  
DM = diabetes mellitus  
DPA = docosapentaenoic acid  
E = dietary energy  
EPA = eicosapentaenoic acid or icosapentaenoic acid  
FA = fatty acid  
FFQ = food frequency questionnaire  
FH = family history  
HDL = high density lipoprotein  
H/O = personal history of  
HRT = hormone replacement therapy  
HT = hypertension  
MI = myocardial infarction  
mo = months  
MUFA = mono-unsaturated fatty acids  
n-3 = omega 3  
PUFA = poly-unsaturated fatty acids  
PTCA = percutaneous  
P/S = poly-unsaturated / saturated fat ratio  
SBP = systolic blood pressure  
SFA = saturated fatty acids  
TG = serum triglycerides  
TIA = transient ischaemic attack  
USA = United States of America  
veg = vegetables  
WHO = World Health Organization  
yrs = years



**Supplementary Table B. Effect of higher vs lower LCn3 on diagnosis of T2DM**

| Factor assessed             | Subgroup                                               | Number of comparisons | Number of participants | Risk Ratio (M-H, Random, 95%CI) | I <sup>2</sup> for subgroup, % | Chi <sup>2</sup> test for subgroup differences, p-value |
|-----------------------------|--------------------------------------------------------|-----------------------|------------------------|---------------------------------|--------------------------------|---------------------------------------------------------|
| Random effects              | Nil                                                    | 17                    | 58643                  | 1.00 [0.85, 1.17]               | 45                             | NA                                                      |
| <b>SENSITIVITY ANALYSES</b> |                                                        |                       |                        |                                 |                                |                                                         |
| Fixed effects               | Nil                                                    | 17                    | 58643                  | 1.01 [0.93, 1.09]               | 45                             | NA                                                      |
| Summary risk of bias        | Low summary risk of bias                               | 6                     | 9616                   | 0.76 [0.49, 1.19]               | 72                             | 0.17                                                    |
|                             | Moderate or high risk of bias                          | 11                    | 49027                  | 1.05 [0.96, 1.15]               | 0                              |                                                         |
| Compliance risk             | Low                                                    | 8                     | 10024                  | 0.97 [0.81, 1.18]               | 0                              | NA                                                      |
| Industry Funding            | None                                                   | 4                     | 4620                   | 0.53 [0.22, 1.27]               | 85                             | NA                                                      |
| Lack of Trial Register      | Either before 2010 or after 2010 with a trial register | 16                    | 58385                  | 1.03 [0.95, 1.12]               | 0                              | NA                                                      |
| Trial size                  | ≥ 100 participants                                     | 14                    | 58440                  | 1.01 [0.85, 1.19]               | 51                             | NA                                                      |
| <b>SUBGROUPS</b>            |                                                        |                       |                        |                                 |                                |                                                         |
| Type of intervention        | Dietary advice                                         | 1                     | 101                    | 0.98 [0.06, 15.25]              | NA                             | 0.61                                                    |
|                             | Supplemental foods                                     | 1                     | 4837                   | 0.93 [0.71, 1.21]               | NA                             |                                                         |
|                             | Supplements (capsules)                                 | 13                    | 48558                  | 0.98 [0.81, 1.20]               | 56                             |                                                         |
|                             | Any combination                                        | 2                     | 5147                   | 2.56 [0.60, 11.01]              | 0                              |                                                         |
| Replacement                 | LCn3 vs SFA                                            | 0                     | 0                      | Not estimable                   | NA                             | 0.38                                                    |
|                             | LCn3 vs MUFA                                           | 4                     | 18138                  | 1.05 [0.91, 1.22]               | 0                              |                                                         |
|                             | LCn3 vs n6                                             | 2                     | 596                    | 1.00 [0.44, 2.28]               | 0                              |                                                         |
|                             | LCn3 vs CHO                                            | 0                     | 0                      | Not estimable                   | NA                             |                                                         |
|                             | LCn3 vs non-fat or nil or low n3                       | 10                    | 39808                  | 0.95 [0.70, 1.29]               | 67                             |                                                         |
|                             | LCn3 vs unclear                                        | 1                     | 101                    | 0.98 [0.06, 15.25]              | NA                             |                                                         |
|                             | ALA vs. n6                                             | 1                     | 13406                  | 0.40 [0.15, 1.03]               | NA                             |                                                         |
| Primary or                  | General population (no elevated risk)                  | 13                    | 54885                  | 1.04 [0.96, 1.13]               | 0                              | 0.17                                                    |

|                                |                                               |    |       |                    |    |      |
|--------------------------------|-----------------------------------------------|----|-------|--------------------|----|------|
| <b>secondary prevention</b>    |                                               |    |       |                    |    |      |
|                                | Higher risk group but not diagnosed with T2DM | 4  | 3758  | 0.46 [0.14, 1.49]  | 83 |      |
| <b>Diabetic medication use</b> | DM meds used by up to 50%                     | 11 | 50547 | 1.03 [0.94, 1.12]  | 0  | 0.78 |
|                                | DM meds used by 50%+                          | 0  | 0     | Not estimable      | NA |      |
|                                | DM med use unclear                            | 6  | 8096  | 0.92 [0.44, 1.94]  | 77 |      |
| <b>Trial duration</b>          | Duration 6 mo to <12 mo                       | 2  | 108   | 0.38 [0.10, 1.42]  | 0  | 0.22 |
|                                | Duration 12 to <24mo                          | 5  | 1521  | 0.85 [0.29, 2.46]  | 77 |      |
|                                | Duration 24 to <48 mo                         | 5  | 15756 | 0.99 [0.89, 1.10]  | 0  |      |
|                                | Duration 48+ mo                               | 5  | 41258 | 1.12 [0.98, 1.28]  | 0  |      |
| <b>LCn3 dose</b>               | LCn3 ≤150mg/d                                 | 0  | 0     | Not estimable      | NA | 0.70 |
|                                | LCn3 >150 to ≤250mg/d                         | 0  | 0     | Not estimable      | NA |      |
|                                | LCn3 >250 to ≤400mg/d                         | 1  | 4837  | 0.93 [0.71, 1.21]  | NA |      |
|                                | LCn3 >400 to ≤2400mg/d                        | 11 | 49843 | 0.96 [0.76, 1.20]  | 62 |      |
|                                | LCn3 >2.4g/d to ≤4.4g/d                       | 4  | 3856  | 1.10 [0.80, 1.51]  | 0  |      |
|                                | LCn3 >4.4g/d                                  | 1  | 139   | 1.86 [0.08, 44.89] | NA |      |
| <b>Sex</b>                     | Male & female                                 | 14 | 52933 | 0.98 [0.82, 1.17]  | 53 | 0.50 |
|                                | Male only                                     | 3  | 5710  | 1.27 [0.61, 2.67]  | 0  |      |
|                                | Female only                                   | 0  | 0     | Not estimable      | 0  |      |
| <b>Age</b>                     | Mean age <50 years                            | 0  | 0     | Not estimable      | -  | 0.91 |
|                                | Mean age 50 to <60 years                      | 8  | 11217 | 0.90 [0.42, 1.95]  | 67 |      |
|                                | Mean age 60-70 years                          | 7  | 43139 | 1.07 [0.92, 1.24]  | 11 |      |
|                                | Mean age >70 years                            | 2  | 4287  | 1.04 [0.81, 1.34]  | 0  |      |

**Supplementary Table C. Effect of higher vs lower LCn3 on HbA1c, %**

| Factor assessed                | Subgroup                                               | Number of comparisons | Number of participants | Mean Difference (IV, Random*, 95% CI) | I <sup>2</sup> for subgroup, % | Chi <sup>2</sup> test for subgroup differences, p-value |
|--------------------------------|--------------------------------------------------------|-----------------------|------------------------|---------------------------------------|--------------------------------|---------------------------------------------------------|
| <b>Main analysis</b>           | Nil                                                    | 16                    | 32798                  | -0.02 [-0.07, 0.04]                   | 49                             | NA                                                      |
| <b>SENSITIVITY ANALYSIS</b>    |                                                        |                       |                        |                                       |                                |                                                         |
| <b>Fixed effects</b>           | Nil                                                    | 16                    | 32798                  | -0.00 [-0.02, 0.02]                   | 49                             | NA                                                      |
| <b>Summary risk of bias</b>    | Not appropriate - all at moderate or high risk of bias | NA                    | NA                     | NA                                    | NA                             | NA                                                      |
| <b>Compliance Risk of Bias</b> | Low                                                    | 7                     | 918                    | -0.11 [-0.21, -0.01]                  | 31                             | NA                                                      |
| <b>Industry Funding</b>        | None indicated                                         | 3                     | 236                    | 0.04 [-0.34, 0.42]                    | 74                             | NA                                                      |
| <b>Lack of Trial Register</b>  | Either before 2010 or after 2010 with a trial register | 13                    | 32602                  | -0.02 [-0.08, 0.04]                   | 57                             | NA                                                      |
| <b>Trial size</b>              | ≥ 100 participants                                     | 7                     | 32358                  | -0.02 [-0.09, 0.04]                   | 71                             | 0.80                                                    |
| <b>SUBGROUPS</b>               |                                                        |                       |                        |                                       |                                |                                                         |
| <b>Type of intervention</b>    | Dietary advice                                         | 0                     | 0                      | Not estimable                         | NA                             | 0.12                                                    |
|                                | Supplemental foods                                     | 1                     | 32                     | 0.20 [-0.08, 0.48]                    | NA                             |                                                         |
|                                | Supplement (capsules)                                  | 15                    | 32766                  | -0.02 [-0.08, 0.03]                   | 49                             |                                                         |
|                                | Any combination                                        | 0                     | 0                      | Not estimable                         | NA                             |                                                         |
| <b>Replacement</b>             | LCn3 vs SFA                                            | 0                     | 0                      | Not estimable                         | NA                             | 0.008                                                   |
|                                | LCn3 vs MUFA                                           | 5                     | 13079                  | 0.01 [-0.04, 0.05]                    | 0                              |                                                         |
|                                | LCn3 vs n6                                             | 5                     | 788                    | -0.15 [-0.24, -0.06]                  | 0                              |                                                         |
|                                | LCn3 vs CHO                                            | 0                     | 0                      | Not estimable                         | NA                             |                                                         |
|                                | LCn3 vs non-fat or nil or low n3                       | 6                     | 18931                  | 0.02 [-0.08, 0.12]                    | 64                             |                                                         |
|                                | LCn3 vs unclear                                        | 0                     | 0                      | Not estimable                         | NA                             |                                                         |
| <b>Primary or secondary</b>    | General population (no elevated risk)                  | 7                     | 3225                   | -0.00 [-0.06, 0.06]                   | 60                             | 0.01                                                    |

| Factor assessed         | Subgroup                                      | Number of comparisons | Number of participants | Mean Difference (IV, Random*, 95% CI) | I <sup>2</sup> for subgroup, % | Chi <sup>2</sup> test for subgroup differences, p-value |
|-------------------------|-----------------------------------------------|-----------------------|------------------------|---------------------------------------|--------------------------------|---------------------------------------------------------|
| prevention              | Higher risk group but not diagnosed with T2DM | 2                     | 172                    | -0.15 [-0.25, -0.04]                  | 0                              |                                                         |
|                         | Existing diagnosis of T2DM                    | 7                     | 401                    | 0.16 [-0.05, 0.37]                    | 0                              |                                                         |
| Diabetic medication use | DM meds used by up to 50%                     | 11                    | 32457                  | -0.02 [-0.08, 0.04]                   | 61                             | 0.28                                                    |
|                         | DM meds used by 50%+                          | 5                     | 341                    | 0.17 [-0.18, 0.52]                    | 0                              |                                                         |
|                         | DM meds use unclear                           | 0                     | 0                      | Not estimable                         | NA                             |                                                         |
| Trial duration          | Duration 6 to <12 mo                          | 10                    | 986                    | -0.05 [-0.16, 0.06]                   | 15                             | 0.71                                                    |
|                         | Duration 12 to <24 mo                         | 2                     | 128                    | 0.02 [-0.24, 0.28]                    | 0                              |                                                         |
|                         | Duration 24 to <48 mo                         | 2                     | 534                    | 0.04 [-0.54, 0.63]                    | 78                             |                                                         |
|                         | Duration 48+ mo                               | 3                     | 31150                  | 0.02 [-0.03, 0.07]                    | 63                             |                                                         |
| LCn3 dose               | LCn3 ≤150mg/d                                 | 0                     | 0                      | Not estimable                         | NA                             | 0.28                                                    |
|                         | LCn3 >150 to ≤250mg/d                         | 0                     | 0                      | Not estimable                         | NA                             |                                                         |
|                         | LCn3 >250 to ≤400mg/d                         | 0                     | 0                      | Not estimable                         | NA                             |                                                         |
|                         | LCn3 >400 to ≤2400mg/d                        | 11                    | 32570                  | -0.03 [-0.09, 0.03]                   | 61                             |                                                         |
|                         | LCn3 >2.4g/d to ≤4.4g/d                       | 2                     | 127                    | -0.01 [-0.28, 0.26]                   | 0                              |                                                         |
|                         | LCn3 >4.4g/d                                  | 2                     | 53                     | 0.61 [-0.44, 1.67]                    | 0                              |                                                         |
|                         | LCn3 dose unclear                             | 1                     | 32                     | 0.20 [-0.08, 0.48]                    | NA                             |                                                         |
| Sex                     | Male & female                                 | 14                    | 32296                  | 0.01 [-0.04, 0.05]                    | 34                             | 0.17                                                    |
|                         | Male only                                     | 2                     | 502                    | -0.14 [-0.33, 0.06]                   | 42                             |                                                         |
|                         | Female only                                   | 0                     | 0                      | Not estimable                         | -                              |                                                         |
| Age                     | Mean age <50 years                            | 2                     | 137                    | 0.11 [-0.34, 0.56]                    | 0                              | 0.52                                                    |
|                         | Mean age 50 to <60 years                      | 4                     | 587                    | 0.08 [-0.12, 0.29]                    | 0                              |                                                         |
|                         | Mean age 60-70 years                          | 10                    | 32074                  | -0.03 [-0.09, 0.04]                   | 66                             |                                                         |
|                         | Mean age >70 years                            | 0                     | 0                      | Not estimable                         | -                              |                                                         |

**Supplementary Table D. Effect of higher vs lower LCn3 on HOMA-IR**

| Factor assessed                | Subgroup                                               | Number of comparisons | Number of participants | Mean Difference (IV, Random, 95% CI) | I <sup>2</sup> (%) for subgroup | Chi <sup>2</sup> test for subgroup differences, p-value |
|--------------------------------|--------------------------------------------------------|-----------------------|------------------------|--------------------------------------|---------------------------------|---------------------------------------------------------|
| <b>Main analysis</b>           | Nil                                                    | 13                    | 1064                   | 0.06 [-0.21, 0.33]                   | 18                              | NA                                                      |
| <b>SENSITIVITY ANALYSIS</b>    |                                                        |                       |                        |                                      |                                 |                                                         |
| <b>Fixed effects</b>           | Nil                                                    | 13                    | 1064                   | 0.11 [-0.08, 0.30]                   | 17                              | NA                                                      |
| <b>Summary risk of bias</b>    | Low                                                    | 2                     | 292                    | 0.01 [-5.28, 5.29]                   | 62                              | 0.98                                                    |
|                                | Moderate or high                                       | 11                    | 772                    | 0.07 [-0.18, 0.33]                   | 16                              |                                                         |
| <b>Compliance Risk of Bias</b> | Low                                                    | 4                     | 205                    | 0.18 [-0.27, 0.63]                   | 38                              | NA                                                      |
| <b>Industry Funding</b>        | No industry funding indicated                          | 4                     | 521                    | -0.38 [-1.24, 0.47]                  | 0                               | NA                                                      |
| <b>Lack of Trial Register</b>  | Either before 2010 or after 2010 with a trial register | 10                    | 758                    | 0.06 [-0.22, 0.34]                   | 24                              | NA                                                      |
| <b>Trial size</b>              | ≥ 100 participants                                     | 3                     | 697                    | -1.15 [-2.61, 0.30]                  | 0                               | NA                                                      |
| <b>SUBGROUPS</b>               |                                                        |                       |                        |                                      |                                 |                                                         |
| <b>Type of intervention</b>    | Dietary advice                                         | 0                     | NA                     | NA                                   | NA                              | 0.72                                                    |
|                                | Supplemental foods                                     | 2                     | 43                     | -0.46 [-2.32, 1.40]                  | 0                               |                                                         |
|                                | Supplement (capsules)                                  | 10                    | 976                    | -0.07 [-0.53, 0.39]                  | 36                              |                                                         |
|                                | Any combination                                        | 1                     | 45                     | 0.10 [-0.19, 0.39]                   | NA                              |                                                         |
| <b>Replacement</b>             | LCn3 vs SFA                                            | 0                     | NA                     | NA                                   | NA                              | 0.78                                                    |
|                                | LCn3 vs MUFA                                           | 3                     | 65                     | 0.14 [-0.21, 0.50]                   | 0                               |                                                         |
|                                | LCn3 vs n6                                             | 4                     | 215                    | 0.20 [-1.47, 1.86]                   | 52                              |                                                         |
|                                | LCn3 vs CHO                                            | 0                     | NA                     | NA                                   | NA                              |                                                         |
|                                | LCn3 vs non-fat or nil or low n3                       | 6                     | 784                    | -0.02 [-0.31, 0.28]                  | 1                               |                                                         |
|                                | LCn3 vs unclear                                        | 0                     | NA                     | NA                                   | NA                              |                                                         |
| <b>Primary or secondary</b>    | General population (no elevated risk)                  | 3                     | 400                    | 0.14 [-0.09, 0.37]                   | 0                               | 0.42                                                    |

| Factor assessed         | Subgroup                                      | Number of comparisons | Number of participants | Mean Difference (IV, Random, 95% CI) | I <sup>2</sup> (%) for subgroup | Chi <sup>2</sup> test for subgroup differences, p-value |
|-------------------------|-----------------------------------------------|-----------------------|------------------------|--------------------------------------|---------------------------------|---------------------------------------------------------|
| prevention              | Higher risk group but not diagnosed with T2DM | 7                     | 482                    | -0.23 [-0.93, 0.47]                  | 39                              |                                                         |
|                         | Existing diagnosis of T2DM                    | 3                     | 182                    | -0.70 [-2.50, 1.10]                  | 28                              |                                                         |
| Diabetic medication use | DM meds used by up to 50%                     | 9                     | 802                    | 0.16 [-0.04, 0.36]                   | 0                               | 0.34                                                    |
|                         | DM meds used by 50%+                          | 2                     | 150                    | -0.19 [-4.60, 4.22]                  | 57                              |                                                         |
|                         | DM meds use unclear                           | 2                     | 112                    | -0.46 [-1.26, 0.35]                  | 0                               |                                                         |
| Trial duration          | Duration 6 to <12 mo                          | 9                     | 716                    | -0.04 [-0.46, 0.37]                  | 31                              | 0.59                                                    |
|                         | Duration 12 to <24 mo                         | 4                     | 348                    | 0.09 [-0.20, 0.39]                   | 0                               |                                                         |
|                         | Duration 24 to <48 mo                         | 0                     | NA                     | NA                                   | NA                              |                                                         |
|                         | Duration 48+ mo                               | 0                     | NA                     | NA                                   | NA                              |                                                         |
| LCn3 dose               | LCn3 ≤150mg/d                                 | 0                     | NA                     | NA                                   | NA                              | 0.20                                                    |
|                         | LCn3 >150 to ≤250mg/d                         | 1                     | 29                     | 0.20 [-0.17, 0.57]                   | NA                              |                                                         |
|                         | LCn3 >250 to ≤400mg/d                         | 0                     | NA                     | NA                                   | NA                              |                                                         |
|                         | LCn3 >400 to ≤2400mg/d                        | 5                     | 281                    | -0.72 [-1.47, 0.03]                  | 3                               |                                                         |
|                         | LCn3 >2.4g/d to ≤4.4g/d                       | 4                     | 640                    | 0.21 [-0.37, 0.80]                   | 9                               |                                                         |
|                         | LCn3 >4.4g/d                                  | 1                     | 37                     | 3.00 [-2.78, 8.78]                   | NA                              |                                                         |
|                         | LCn3 dose unclear                             | 2                     | 77                     | 0.09 [-0.20, 0.38]                   | 0                               |                                                         |
| Sex                     | Male & female                                 | 12                    | 977                    | 0.09 [-0.19, 0.37]                   | 18                              | 0.34                                                    |
|                         | Male only                                     | 0                     | 0                      | Not estimable                        | -                               |                                                         |
|                         | Female only                                   | 1                     | 87                     | -0.40 [-1.37, 0.57]                  | =                               |                                                         |
| Age                     | Mean age <50 years                            | 5                     | 170                    | 0.13 [-0.09, 0.36]                   | 0                               | 0.37                                                    |
|                         | Mean age 50 to <60 years                      | 7                     | 862                    | -0.43 [-1.20, 0.34]                  | 46                              |                                                         |
|                         | Mean age 60-70 years                          | 1                     | 32                     | -0.30 [-2.42, 1.82]                  | -                               |                                                         |
|                         | Mean age >70 years                            | 0                     | 0                      | Not estimable                        | -                               |                                                         |

**Supplementary Table E. Effect of higher vs lower LCn3 on fasting insulin, pmol/L**

| Factor assessed             | Subgroup                                          | Number of comparisons | Number of participants | Mean Difference (IV, Random, 95% CI) | I <sup>2</sup> for subgroup, % | Chi <sup>2</sup> test for subgroup differences |
|-----------------------------|---------------------------------------------------|-----------------------|------------------------|--------------------------------------|--------------------------------|------------------------------------------------|
| Main analysis               | nil                                               | 17                    | 2077                   | 1.02 [-4.34, 6.37]                   | 43                             | NA                                             |
| <b>SENSITIVITY ANALYSIS</b> |                                                   |                       |                        |                                      |                                |                                                |
| Fixed effects               | nil                                               | 17                    | 2077                   | 0.61 [-1.41, 2.62]                   | 43                             | NA                                             |
| Summary risk of bias        | Low summary risk of bias                          | 3                     | 387                    | 25.27 [4.11, 46.44]                  | 0                              | 0.02                                           |
|                             | Moderate to high summary risk of bias             | 14                    | 1690                   | -0.16 [-5.17, 4.86]                  | 38                             |                                                |
| Compliance risk of bias     | Low                                               | 8                     | 844                    | 2.73 [-8.30, 13.77]                  | 66                             | NA                                             |
| Industry Funding            | None indicated                                    | 4                     | 484                    | 0.87 [-6.39, 8.14]                   | 0                              | NA                                             |
| Lack of Trial Register      | Either before 2010 or after 2010 w trial register | 14                    | 1708                   | 0.35 [-5.71, 6.41]                   | 51                             | NA                                             |
| Trial size                  | ≥ 100 participants                                | 7                     | 1625                   | -6.21 [-16.21, 3.79]                 | 49                             | 0.06                                           |
| <b>SUBGROUPS</b>            |                                                   |                       |                        |                                      |                                |                                                |
| Type of intervention        | Dietary advice                                    | 0                     | 0                      | Not estimable                        | NA                             | 0.26                                           |
|                             | Supplemental foods                                | 3                     | 104                    | 9.05 [-5.46, 23.56]                  | 0                              |                                                |
|                             | Supplement (capsule)                              | 14                    | 1973                   | 0.03 [-5.94, 5.99]                   | 50                             |                                                |
|                             | Any combination                                   | 0                     | 0                      | Not estimable                        | NA                             |                                                |
| Replacement                 | LCn3 vs SFA                                       | 0                     | 0                      | Not estimable                        | NA                             | 0.88                                           |
|                             | LCn3 vs MUFA                                      | 6                     | 674                    | 3.69 [-5.18, 12.56]                  | 35                             |                                                |
|                             | LCn3 vs n6                                        | 5                     | 548                    | -0.47 [-26.06, 25.12]                | 77                             |                                                |
|                             | LCn3 vs CHO                                       | 0                     | 0                      | Not estimable                        | NA                             |                                                |
|                             | LCn3 vs non-fat or nil or low n3                  | 5                     | 810                    | 0.92 [-6.19, 8.04]                   | 0                              |                                                |
|                             | LCn3 vs unclear                                   | 1                     | 45                     | 0.41 [-1.86, 2.68]                   | NA                             |                                                |
| Primary or secondary        | General population (no elevated risk)             | 8                     | 1377                   | 0.68 [-5.58, 6.95]                   | 44                             | 0.35                                           |

| Factor assessed         | Subgroup                                      | Number of comparisons | Number of participants | Mean Difference (IV, Random, 95% CI) | I <sup>2</sup> for subgroup, % | Chi <sup>2</sup> test for subgroup differences |
|-------------------------|-----------------------------------------------|-----------------------|------------------------|--------------------------------------|--------------------------------|------------------------------------------------|
| prevention              | Higher risk group but not diagnosed with T2DM | 7                     | 555                    | 4.85 [-6.67, 16.37]                  | 33                             |                                                |
|                         | Existing diagnosis of T2DM                    | 2                     | 145                    | -25.28 [-65.37, 14.82]               | 51                             |                                                |
| Diabetic medication use | DM meds used by up to 50%                     | 14                    | 1852                   | 2.55 [-2.49, 7.59]                   | 37                             | 0.02                                           |
|                         | DM meds used by 50%+                          | 1                     | 113                    | -45.10 [-83.39, -6.81]               | NA                             |                                                |
|                         | DM meds use unclear                           | 2                     | 112                    | -13.33 [-33.49, 6.83]                | 0                              |                                                |
| Trial duration          | Duration 6 to <12 mo                          | 10                    | 1227                   | -0.01 [-7.89, 7.86]                  | 40                             | 0.04                                           |
|                         | Duration 12 to <24 mo                         | 6                     | 543                    | 6.50 [-3.22, 16.23]                  | 38                             |                                                |
|                         | Duration 24 to <48 mo                         | 1                     | 307                    | -18.80 [-35.84, -1.76]               | NA                             |                                                |
|                         | Duration 48+ mo                               | 0                     | 0                      | Not estimable                        | NA                             |                                                |
| LCn3 dose               | LCn3 ≤150mg/d                                 | 0                     | 0                      | Not estimable                        | NA                             | 0.28                                           |
|                         | LCn3 >150 to ≤250mg/d                         | 1                     | 29                     | 3.47 [-7.71, 14.65]                  | NA                             |                                                |
|                         | LCn3 >250 to ≤400mg/d                         | 0                     | 0                      | Not estimable                        | NA                             |                                                |
|                         | LCn3 >400 to ≤2400mg/d                        | 9                     | 1179                   | -2.50 [-9.24, 4.23]                  | 52                             |                                                |
|                         | LCn3 >2.4 to ≤4.4g/d                          | 5                     | 737                    | 14.31 [-2.12, 30.74]                 | 25                             |                                                |
|                         | LCn3 >4.4g/d                                  | 0                     | 0                      | Not estimable                        | NA                             |                                                |
|                         | LCn3 dose unclear                             | 2                     | 132                    | 2.58 [-11.94, 17.11]                 | 0                              |                                                |
| Sex                     | Male & female                                 | 15                    | 1683                   | 2.96 [-2.19, 8.11]                   | 35                             | 0.03                                           |
|                         | Male only                                     | 1                     | 307                    | -18.80 [-35.84, -1.76]               | -                              |                                                |
|                         | Female only                                   | 1                     | 87                     | -14.00 [-38.20, 10.20]               | -                              |                                                |
| Age                     | Mean age <50 years                            | 5                     | 233                    | 0.58 [-1.61, 2.78]                   | 0                              | 0.71                                           |
|                         | Mean age 50 to <60 years                      | 9                     | 1398                   | 2.79 [-10.61, 16.20]                 | 60                             |                                                |
|                         | Mean age 60-70 years                          | 3                     | 446                    | -5.83 [-22.30, 10.63]                | 61                             |                                                |
|                         | Mean age >70 years                            | 0                     | 0                      | Not estimable                        | -                              |                                                |



**Supplementary Table F. Effect of higher vs lower LCn3 on fasting plasma glucose, mmol/L**

| Factor assessed                        | Subgroup                                   | Number of comparisons | Number of participants | Mean Difference (IV, Random, 95% CI) | I <sup>2</sup> for subgroup, % | Chi <sup>2</sup> test for subgroup differences, p-value |
|----------------------------------------|--------------------------------------------|-----------------------|------------------------|--------------------------------------|--------------------------------|---------------------------------------------------------|
| <b>Main analysis</b>                   | Nil                                        | 34                    | 35156                  | 0.04 [0.02, 0.07]                    | 0                              | NA                                                      |
| <b>SENSITIVITY ANALYSIS</b>            |                                            |                       |                        |                                      |                                |                                                         |
| <b>Fixed effects</b>                   | Nil                                        | 34                    | 35156                  | 0.04 [0.02, 0.07]                    | 0                              | NA                                                      |
| <b>Summary risk of bias</b>            | Low RoB                                    | 2                     | 353                    | -0.45 [-1.49, 0.59]                  | 54                             | 0.36                                                    |
|                                        | Moderate to high RoB                       | 32                    | 34803                  | 0.04 [0.02, 0.07]                    | 0                              |                                                         |
| <b>Compliance Risk of Bias</b>         | Low                                        | 13                    | 2150                   | -0.07 [-0.16, 0.02]                  | 0                              | NA                                                      |
| <b>Industry Funding</b>                | None                                       | 6                     | 728                    | -0.06 [-0.50, 0.39]                  | 48                             | NA                                                      |
| <b>Lack of Trial Register</b>          | Before 2010 or after 2010 w trial register | 27                    | 34508                  | 0.05 [0.02, 0.07]                    | 0                              | NA                                                      |
| <b>Trial size</b>                      | ≥ 100 participants                         | 15                    | 34184                  | 0.03 [-0.02, 0.08]                   | 18                             | NA                                                      |
| <b>SUBGROUPS</b>                       |                                            |                       |                        |                                      |                                |                                                         |
| <b>Type of intervention</b>            | Dietary advice                             | None                  | NA                     | Not estimable                        | NA                             | 0.11                                                    |
|                                        | Supplemental foods                         | 2                     | 106                    | -0.00 [-0.26, 0.26]                  | 0                              |                                                         |
|                                        | Supplements (capsules)                     | 29                    | 34779                  | 0.05 [0.02, 0.07]                    | 0                              |                                                         |
|                                        | Any combination                            | 3                     | 271                    | -0.13 [-0.29, 0.04]                  | 0                              |                                                         |
| <b>Replacement</b>                     | LCn3 vs SFA                                | None                  | NA                     | Not estimable                        | NA                             | 0.86                                                    |
|                                        | LCn3 vs MUFA                               | 10                    | 13371                  | 0.05 [-0.01, 0.12]                   | 0                              |                                                         |
|                                        | LCn3 vs n6                                 | 10                    | 1320                   | 0.01 [-0.11, 0.14]                   | 31                             |                                                         |
|                                        | LCn3 vs CHO                                | NA                    | NA                     | Not estimable                        | NA                             |                                                         |
|                                        | LCn3 vs non-fat or nil or low n3           | 14                    | 20465                  | 0.04 [0.02, 0.07]                    | 0                              |                                                         |
|                                        | LCn3 vs unclear                            | 0                     | 0                      | Not estimable                        | NA                             |                                                         |
| <b>Primary or secondary prevention</b> | General population (no elevated risk)      | 20                    | 34220                  | 0.04 [0.02, 0.07]                    | 0                              | 0.63                                                    |
|                                        | Higher risk group but not                  | 7                     | 568                    | 0.00 [-0.19, 0.20]                   | 0                              |                                                         |

| Factor assessed                | Subgroup                   | Number of comparisons | Number of participants | Mean Difference (IV, Random, 95% CI) | I <sup>2</sup> for subgroup, % | Chi <sup>2</sup> test for subgroup differences, p-value |
|--------------------------------|----------------------------|-----------------------|------------------------|--------------------------------------|--------------------------------|---------------------------------------------------------|
|                                | diagnosed with T2DM        |                       |                        |                                      |                                |                                                         |
|                                | Existing diagnosis of T2DM | 7                     | 368                    | 0.24 [-0.19, 0.67]                   | 0                              |                                                         |
| <b>Diabetic medication use</b> | DM meds used by up to 50%  | 26                    | 34736                  | 0.04 [0.02, 0.07]                    | 0                              | 0.25                                                    |
|                                | DM meds used by 50%+       | 5                     | 308                    | 0.42 [-0.16, 1.00]                   | 0                              |                                                         |
|                                | DM med use unclear         | 2                     | 112                    | -0.21 [-0.68, 0.26]                  | 0                              |                                                         |
| <b>Trial duration</b>          | Duration 6 to <12 mo       | 21                    | 1959                   | 0.02 [-0.07, 0.11]                   | 0                              | 0.07                                                    |
|                                | Duration 12 to <24 mo      | 7                     | 1142                   | -0.06 [-0.17, 0.04]                  | 1                              |                                                         |
|                                | Duration 24 to <48 mo      | 3                     | 905                    | -0.09 [-0.27, 0.09]                  | 5                              |                                                         |
|                                | Duration 48+ mo            | 3                     | 31150                  | 0.05 [0.03, 0.08]                    | 0                              |                                                         |
| <b>LCn3 dose</b>               | LCn3 ≤150mg/d              | 0                     | 0                      | Not estimable                        | NA                             | 0.34                                                    |
|                                | LCn3 >150 to ≤250mg/d      | 1                     | 29                     | 0.00 [-0.31, 0.31]                   | NA                             |                                                         |
|                                | LCn3 >250 to ≤400mg/d      | 0                     | 0                      | Not estimable                        | NA                             |                                                         |
|                                | LCn3 >400 to ≤2400mg/d     | 15                    | 32847                  | 0.04 [-0.01, 0.08]                   | 11                             |                                                         |
|                                | LCn3 >2.4 to ≤4.4g/d       | 13                    | 2034                   | 0.01 [-0.10, 0.11]                   | 0                              |                                                         |
|                                | LCn3 >4.4g/d               | 2                     | 69                     | 1.12 [0.04, 2.19]                    | 6                              |                                                         |
|                                | LCn3 dose unclear          | 3                     | 177                    | -0.01 [-0.14, 0.12]                  | 0                              |                                                         |
| <b>Sex</b>                     | Male & female              | 31                    | 34582                  | 0.05 [0.02, 0.07]                    | 0                              | 0.10                                                    |
|                                | Male only                  | 1                     | 487                    | -0.20 [-0.46, 0.06]                  | -                              |                                                         |
|                                | Female only                | 1                     | 87                     | -0.30 [-0.93, 0.33]                  | -                              |                                                         |
| <b>Age</b>                     | Mean age <50 years         | 7                     | 391                    | -0.01 [-0.11, 0.10]                  | 3                              | 0.09                                                    |
|                                | Mean age 50 to <60 years   | 15                    | 2415                   | -0.06 [-0.18, 0.05]                  | 0                              |                                                         |
|                                | Mean age 60-70 years       | 11                    | 32350                  | 0.05 [0.02, 0.08]                    | 2                              |                                                         |
|                                | Mean age >70 years         | 0                     | 0                      | Not estimable                        | -                              |                                                         |

**Supplementary Table G. Effect of higher vs lower ALA on diagnosis of type 2 diabetes**

| Factor assessed             | Subgroup         | Number of comparisons | Number of participants | Risk Ratio (M-H, Random, 95%CI) | I <sup>2</sup> % |
|-----------------------------|------------------|-----------------------|------------------------|---------------------------------|------------------|
| Main analysis               | Nil              | 2                     | 18243                  | 0.68 [0.33, 1.39]               | 59               |
| Fixed effects               | Nil              | 2                     | 18243                  | 0.82 [0.63, 1.05]               | 59               |
| <b>Summary risk of bias</b> | Low risk of bias | 1                     | 4837                   | 0.87 [0.67, 1.14]               | NA               |
| Compliance risk             | Nil              | 1                     | 4837                   | 0.87 [0.67, 1.14]               | NA               |

**Supplementary Table H. Effect of higher vs lower ALA on HbA1c, %**

| Factor assessed             | Subgroup                                               | Number of comparisons | Number of participants | Mean Difference (IV, Random*, 95% CI) | I <sup>2</sup> % |
|-----------------------------|--------------------------------------------------------|-----------------------|------------------------|---------------------------------------|------------------|
| Main analysis               | Nil                                                    | 3                     | 178                    | 0.01 [-0.43, 0.45]                    | 0%               |
| Fixed effects               | Nil                                                    | 3                     | 178                    | 0.01 [-0.43, 0.45]                    | 0%               |
| <b>Summary risk of bias</b> | Not appropriate - all at moderate or high risk of bias | NA                    | NA                     | NA                                    | NA               |
| <b>Compliance risk</b>      | Nil                                                    | 1                     | 108                    | -0.10 [-1.02, 0.82]                   | NA               |

**Supplementary Table I. Effect of higher vs lower ALA on HOMA-IR**

| Factor assessed             | Subgroup                                               | Number of comparisons | Number of participants | Mean Difference (IV, Random*, 95% CI) | I <sup>2</sup> % |
|-----------------------------|--------------------------------------------------------|-----------------------|------------------------|---------------------------------------|------------------|
| Main analysis               | Nil                                                    | 3                     | 294                    | 0.10 [-0.50, 0.70]                    | 0                |
| Fixed effects               | Nil                                                    | 3                     | 294                    | 0.10 [-0.50, 0.70]                    | 0                |
| <b>Summary risk of bias</b> | Not appropriate - all at moderate or high risk of bias | NA                    | NA                     | NA                                    | NA               |
| <b>Compliance bias</b>      | Nil                                                    | 2                     | 234                    | -0.10 [-0.87, 0.68]                   | 0                |

**Supplementary Table J. Effect of higher vs lower ALA on fasting insulin, pmol/L**

| Factor assessed             | Subgroup                                               | Number of comparisons | Number of participants | Mean Difference (IV, Random*, 95% CI) | I <sup>2</sup> % |
|-----------------------------|--------------------------------------------------------|-----------------------|------------------------|---------------------------------------|------------------|
| Main analysis               | Nil                                                    | 6                     | 469                    | 5.30 [-4.68, 15.27]                   | 0                |
| Fixed effects               | Nil                                                    | 6                     | 469                    | 5.30 [-4.68, 15.27]                   | 0                |
| <b>Summary risk of bias</b> | Not appropriate - all at moderate or high risk of bias | NA                    | NA                     | NA                                    | NA               |
| <b>Compliance risk</b>      | Nil                                                    | 4                     | 374                    | 2.02 [-9.07, 13.12]                   | 0                |

**Supplementary Table K. Effect of higher vs lower ALA on fasting plasma glucose, mmol/L**

| Factor assessed             | Subgroup                                               | Number of comparisons | Number of participants | Mean Difference (IV, Random*, 95% CI) | I <sup>2</sup> % |
|-----------------------------|--------------------------------------------------------|-----------------------|------------------------|---------------------------------------|------------------|
| Main analysis               | Nil                                                    | 7                     | 648                    | -0.07 [-0.16, 0.02]                   | 0                |
| Fixed effects               | Nil                                                    | 7                     | 648                    | -0.07 [-0.16, 0.02]                   | 0                |
| <b>Summary risk of bias</b> | Not appropriate - all at moderate or high risk of bias | NA                    | NA                     | NA                                    | NA               |
| <b>Compliance risk</b>      | Nil                                                    | 5                     | 553                    | -0.06 [-0.15, 0.03]                   | 0                |

**Supplementary Table L. Effects of omega-3 compared to more omega-6 on primary outcomes**

| Factor assessed          | Number of comparisons | Number of participants | Risk Ratio (M-H, Random, 95%CI) | I <sup>2</sup> for subgroup, % |
|--------------------------|-----------------------|------------------------|---------------------------------|--------------------------------|
| <b>Diagnosis of T2DM</b> | 3                     | 14002                  | 0.67 [0.35, 1.28]               | 5                              |
| <b>HbA1c %</b>           | 6                     | 841                    | -0.15 [-0.24, -0.06]            | 0                              |
| <b>Fasting insulin</b>   | 8                     | 690                    | -3.23 [-21.73, 15.28]           | 67                             |
| <b>Fasting glucose</b>   | 14                    | 1641                   | -0.03 [-0.11, 0.05]             | 10                             |
| <b>HOMA-IR</b>           | 6                     | 328                    | -0.23 [-1.35, 0.88]             | 60                             |

**Supplementary Table M. Effects of higher vs lower LCn3 on secondary outcomes within this review.**

| <b>Outcome</b>              | <b>Number of comparisons</b> | <b>Number of participants</b> | <b>Mean Difference (IV, Random, 95% CI)</b> | <b>Heterogeneity, I<sup>2</sup>, %</b> | <b>Percentage change from mean baseline</b> |
|-----------------------------|------------------------------|-------------------------------|---------------------------------------------|----------------------------------------|---------------------------------------------|
| All-cause mortality         | 14                           | 69584                         | 0.99 [0.91, 1.07]                           | 40                                     | NA                                          |
| Serum cholesterol, mmol/L   | 34                           | 37914                         | 0.01 [-0.04, 0.05]                          | 69                                     | <1%                                         |
| Serum triglycerides, mmol/L | 35                           | 18205                         | -0.16 [-0.22, -0.11]                        | 54                                     | ~10%                                        |
| Serum HDL, mmol/L           | 35                           | 37982                         | 0.03 [0.01, 0.04]                           | 61                                     | ~3%                                         |
| Serum LDL, mmol/L           | 29                           | 35743                         | 0.01 [-0.02, 0.04]                          | 30                                     | <1%                                         |
| Weight, kg                  | 17                           | 16659                         | 1.06 [0.30, 1.82]                           | 56                                     | 1-2%                                        |
| BMI, kg/m <sup>2</sup>      | 17                           | 15192                         | 0.34 [0.01, 0.66]                           | 52                                     | 1-2%                                        |
| %body fat                   | 6                            | 478                           | -0.53 [-2.78, 1.72]                         | 54                                     | 1-2%                                        |
| Waist circumference, cm     | 4                            | 353                           | 0.51 [0.16, 0.87]                           | 0                                      | <1%                                         |
| Waist:hip ratio             | 2                            | 162                           | 0.00 [-0.01, 0.01]                          | 0                                      | 0                                           |
| Total Body fat, kg          | 3                            | 110                           | 0.87 [0.47, 1.27]                           | 0                                      | ~4%                                         |

**Supplementary Table N. Effects of higher vs lower ALA on secondary outcomes within this review.**

| <b>Outcome</b>            | <b>Number of comparisons</b> | <b>Number of participants</b> | <b>Mean Difference (IV, Random*, 95% CI)</b> | <b>Heterogeneity, I<sup>2</sup>, %</b> |
|---------------------------|------------------------------|-------------------------------|----------------------------------------------|----------------------------------------|
| All-cause mortality       | 2                            | 15939                         | 1.03 [0.81, 1.30]                            | 0                                      |
| Serum cholesterol, mmol/L | 6                            | 1672                          | -0.06 [-0.20, 0.08]                          | 39                                     |
| Triglycerides, mmol/L     | 9                            | 1893                          | 0.01 [-0.08, 0.10]                           | 26                                     |
| Serum HDL, mmol/L         | 8                            | 1812                          | -0.01 [-0.05, 0.02]                          | 18                                     |
| Serum LDL, mmol/L         | 7                            | 1709                          | -0.03 [-0.10, 0.04]                          | 0                                      |
| Weight, kg                | 7                            | 552                           | -1.07 [-3.24, 1.10]                          | 61                                     |
| BMI, kg/m <sup>2</sup>    | 4                            | 1580                          | -0.39 [-1.61, 0.82]                          | 79                                     |
| %body fat                 | 1                            | 81                            | -2.00 [-5.11, 1.11]                          | NA                                     |
| Waist circumference, cm   | 4                            | 279                           | -0.69 [-3.52, 2.14]                          | 49                                     |
| Waist:hip ratio           | None                         | NA                            | NA                                           | NA                                     |
| Total Body fat, kg        | None                         | NA                            | NA                                           | NA                                     |

**Supplementary Table O. Effect of higher vs lower omega-6 on diagnosis of type 2 diabetes**

| Factor assessed             | Subgroup                                                   | Number of comparisons | Number of participants | Risk Ratio (M-H, Random, 95%CI) | I <sup>2</sup> for subgroup, % |
|-----------------------------|------------------------------------------------------------|-----------------------|------------------------|---------------------------------|--------------------------------|
| Main analysis               | Nil                                                        | 2                     | 2087                   | 1.52 [0.19, 12.05]              | 0                              |
| Fixed effects               | Nil                                                        | 2                     | 2087                   | 1.60 [0.22, 11.77]              | 0                              |
| <b>Summary risk of bias</b> | Not appropriate – none at low summary risk of bias         | NA                    | NA                     | NA                              | NA                             |
| Compliance bias             | Not appropriate – none at low risk of bias from compliance | NA                    | NA                     | NA                              | NA                             |

**Supplementary Table P. Effect of higher vs lower omega-6 on HbA1c, %**

| Factor assessed             | Subgroup                                               | Number of comparisons | Number of participants | Mean Difference (IV, Random*, 95% CI) | I <sup>2</sup> for subgroup, % |
|-----------------------------|--------------------------------------------------------|-----------------------|------------------------|---------------------------------------|--------------------------------|
| Main analysis               | Nil                                                    | 2                     | 64                     | 0.00 [-1.01, 1.01]                    | 0                              |
| Fixed effects               | Nil                                                    | 2                     | 64                     | 0.00 [-1.01, 1.01]                    | 0                              |
| <b>Summary risk of bias</b> | Not appropriate - all at moderate or high risk of bias | NA                    | NA                     | NA                                    | NA                             |
| <b>Compliance bias</b>      | Nil                                                    | 1                     | 28                     | 0.00 [-1.94, 1.94]                    | NA                             |



**Supplementary Table Q. Effect of higher vs lower omega-6 on HOMA-IR**

| <b>Factor assessed</b> | <b>Subgroup</b>                                            | <b>Number of comparisons</b> | <b>Number of participants</b> | <b>Mean Difference (IV, Random*, 95% CI)</b> | <b>I<sup>2</sup> for subgroup, %</b> |
|------------------------|------------------------------------------------------------|------------------------------|-------------------------------|----------------------------------------------|--------------------------------------|
| Main analysis          | Nil                                                        | 1                            | 60                            | 1.50 [0.59, 2.41]                            | NA                                   |
| Fixed effects          | Nil                                                        | 1                            | 60                            | 1.50 [0.59, 2.41]                            | NA                                   |
| Summary risk of bias   | Not appropriate - all at moderate or high risk of bias     | NA                           | NA                            | NA                                           | NA                                   |
| Compliance bias        | Not appropriate – none at low risk of bias from compliance | NA                           | NA                            | NA                                           | NA                                   |

**Supplementary Table R. Effect of higher vs lower omega-6 on fasting insulin, mmol/L**

| <b>Factor assessed</b> | <b>Subgroup</b>                                    | <b>Number of comparisons</b> | <b>Number of participants</b> | <b>Mean Difference (IV, Random*, 95% CI)</b> | <b>I<sup>2</sup> for subgroup, %</b> |
|------------------------|----------------------------------------------------|------------------------------|-------------------------------|----------------------------------------------|--------------------------------------|
| Main analysis          | Nil                                                | 3                            | 124                           | 14.71 [-19.81, 49.24]                        | 77                                   |
| Fixed effects          | Nil                                                | 3                            | 124                           | 9.02 [-5.99, 24.04]                          | 77                                   |
| Summary risk of bias   | Not appropriate – none at low summary risk of bias | NA                           | NA                            | NA                                           | NA                                   |
| Compliance bias        | Nil                                                | 1                            | 28                            | 0.00 [-19.24, 19.24]                         | NA                                   |

**Supplementary Table S. Effect of higher vs lower omega-6 on fasting glucose, mmol/L**

| Factor assessed      | Subgroup                                               | Number of comparisons | Number of participants | Mean Difference (IV, Random*, 95% CI) | I <sup>2</sup> for subgroup, % |
|----------------------|--------------------------------------------------------|-----------------------|------------------------|---------------------------------------|--------------------------------|
| Main analysis        | Nil                                                    | 3                     | 134                    | -0.09 [-0.39, 0.20]                   | 0                              |
| Fixed effects        | Nil                                                    | 3                     | 134                    | -0.09 [-0.39, 0.20]                   | 0                              |
| Summary risk of bias | Not appropriate - all at moderate or high risk of bias | NA                    | NA                     | NA                                    | NA                             |
| Compliance bias      | Nil                                                    | 1                     | 28                     | -0.30 [-2.24, 1.64]                   | NA                             |

**Supplementary Table T. Effects of higher vs lower omega-6 on secondary outcomes within this review.**

| Outcome                   | Number of comparisons | Number of participants | Mean Difference (IV, Random*, 95% CI) | Heterogeneity, I <sup>2</sup> , % |
|---------------------------|-----------------------|------------------------|---------------------------------------|-----------------------------------|
| All-cause mortality       | 3                     | 2287                   | 0.98 [0.77, 1.25]                     | 0                                 |
| Serum cholesterol, mmol/L | 6                     | 2114                   | -0.20 [-0.38, -0.02]                  | 40                                |
| Triglycerides, mmol/L     | 7                     | 495                    | -0.03 [-0.16, 0.10]                   | 14                                |
| Serum HDL, mmol/L         | 6                     | 2086                   | -0.03 [-0.11, 0.05]                   | 73                                |
| Serum LDL, mmol/L         | 3                     | 257                    | -0.04 [-0.22, 0.14]                   | 0                                 |
| Weight, kg                | 6                     | 399                    | 1.29 [-1.13, 3.71]                    | 26                                |
| BMI, kg/m <sup>2</sup>    | 3                     | 296                    | 0.49 [-0.70, 1.68]                    | 73                                |
| %body fat                 | 1                     | 190                    | -0.10 [-1.03, 0.83]                   | NA                                |
| Waist circumference, cm   | 1                     | 60                     | 1.20 [-1.81, 4.21]                    | NA                                |
| Waist: hip ratio          | 1                     | 190                    | -0.01 [-0.02, 0.00]                   | NA                                |

**Supplementary Table U. Effect of higher vs lower total PUFA on diagnosis of type 2 diabetes**

| Factor assessed      | Subgroup                                                   | Number of comparisons | Number of participants | Risk Ratio (M-H, Random, 95%CI) | I <sup>2</sup> for subgroup, % |
|----------------------|------------------------------------------------------------|-----------------------|------------------------|---------------------------------|--------------------------------|
| Main analysis        | Nil                                                        | 3                     | 4481                   | 1.08 [0.81, 1.43]               | 0%                             |
| Fixed effects        | Nil                                                        | 3                     | 4481                   | 1.08 [0.81, 1.44]               | 0%                             |
| Summary risk of bias | Not appropriate - all at moderate or high risk of bias     | NA                    | NA                     | NA                              | NA                             |
| Compliance bias      | Not appropriate – none at low risk of bias from compliance | NA                    | NA                     | NA                              | NA                             |

**Supplementary Table V. Effect of higher vs lower total PUFA on HbA1c, %**

| Factor assessed      | Subgroup                                               | Number of comparisons | Number of participants | Mean Difference (IV, Random*, 95% CI) | I <sup>2</sup> for subgroup, % |
|----------------------|--------------------------------------------------------|-----------------------|------------------------|---------------------------------------|--------------------------------|
| Main analysis        | Nil                                                    | 3                     | 172                    | 0.08 [-0.41, 0.56]                    | 0                              |
| Fixed effects        | Nil                                                    | 3                     | 172                    | 0.08 [-0.41, 0.56]                    | 0                              |
| Summary risk of bias | Not appropriate - all at moderate or high risk of bias | NA                    | NA                     | NA                                    | NA                             |
| Compliance bias      | Nil                                                    | 1                     | 28                     | 0.00 [-1.94, 1.94]                    | NA                             |

**Supplementary Table W. Effect of higher vs lower total PUFA on HOMA-IR**

| <b>Factor assessed</b> | <b>Subgroup</b>                                            | <b>Number of comparisons</b> | <b>Number of participants</b> | <b>Mean Difference (IV, Random*, 95% CI)</b> | <b>I<sup>2</sup> for subgroup, %</b> |
|------------------------|------------------------------------------------------------|------------------------------|-------------------------------|----------------------------------------------|--------------------------------------|
| Main analysis          | Nil                                                        | 1                            | 93                            | -0.34 [-0.88, 0.20]                          | NA                                   |
| Fixed effects          | Nil                                                        | 1                            | 93                            | -0.34 [-0.88, 0.20]                          | NA                                   |
| Summary risk of bias   | Not appropriate - all at moderate or high risk of bias     | NA                           | NA                            | NA                                           | NA                                   |
| Compliance bias        | Not appropriate – none at low risk of bias from compliance | NA                           | NA                            | NA                                           | NA                                   |

**Supplementary Table X. Effect of higher vs lower total PUFA on fasting insulin, mmol/L**

| <b>Factor assessed</b> | <b>Subgroup</b>                                        | <b>Number of comparisons</b> | <b>Number of participants</b> | <b>Mean Difference (IV, Random*, 95% CI)</b> | <b>I<sup>2</sup> for subgroup, %</b> |
|------------------------|--------------------------------------------------------|------------------------------|-------------------------------|----------------------------------------------|--------------------------------------|
| Main analysis          | Nil                                                    | 3                            | 157                           | -0.60 [-10.33, 9.14]                         | 0%                                   |
| Fixed effects          | Nil                                                    | 3                            | 157                           | -0.60 [-10.33, 9.14]                         | 0%                                   |
| Summary risk of bias   | Not appropriate - all at moderate or high risk of bias | NA                           | NA                            | NA                                           | NA                                   |
| Compliance bias        | Nil                                                    | 1                            | 28                            | 0.00 [-19.24, 19.24]                         | NA                                   |

**Supplementary Table Y. Effect of higher vs lower total PUFA on fasting glucose, mmol/L**

| Factor assessed      | Subgroup                                               | Number of comparisons | Number of participants | Mean Difference (IV, Random*, 95% CI) | I <sup>2</sup> for subgroup, % |
|----------------------|--------------------------------------------------------|-----------------------|------------------------|---------------------------------------|--------------------------------|
| Main analysis        | Nil                                                    | 3                     | 182                    | -0.04 [-0.18, 0.11]                   | 0                              |
| Fixed effects        | Nil                                                    | 3                     | 182                    | -0.04 [-0.18, 0.11]                   | 0                              |
| Summary risk of bias | Not appropriate - all at moderate or high risk of bias | NA                    | NA                     | NA                                    | NA                             |
| Compliance bias      | Nil                                                    | 1                     | 28                     | -0.30 [-2.24, 1.64]                   | NA                             |

**Supplementary Table Z. Effects of higher vs lower total PUFA on secondary outcomes within this review.**

| Outcome                   | Number of comparisons | Number of participants | Mean Difference (IV, Random*, 95% CI) | Heterogeneity, I <sup>2</sup> , % |
|---------------------------|-----------------------|------------------------|---------------------------------------|-----------------------------------|
| All-cause mortality       | 3                     | 7084                   | 1.01 [0.85, 1.20]                     | 0%                                |
| Serum cholesterol, mmol/L | 6                     | 2146                   | -0.20 [-0.30, -0.10]                  | 2%                                |
| Triglycerides, mmol/L     | 5                     | 467                    | -0.08 [-0.20, 0.05]                   | 0%                                |
| Serum HDL, mmol/L         | 5                     | 2154                   | -0.00 [-0.02, 0.02]                   | 0%                                |
| Serum LDL, mmol/L         | 3                     | 385                    | -0.12 [-0.41, 0.17]                   | 57%                               |
| Weight, kg                | 5                     | 3772                   | 0.36 [-0.06, 0.77]                    | 0%                                |
| BMI, kg/m <sup>2</sup>    | 2                     | 578                    | 0.22 [-0.09, 0.53]                    | 49%                               |
| Waist circumference, cm   | 1                     | 653                    | -0.22 [-1.04, 0.59]                   | 0%                                |
| %body fat                 | 1                     | 214                    | 0.80 [-0.39, 1.99]                    | NA                                |
| Body fat, kg              | 1                     | 214                    | 0.00 [-1.12, 1.12]                    | NA                                |

## Supplementary Figures

### Supplementary Figure A. Risk of bias summary: review authors' judgements about each risk of bias item for each included study.

|                       | Random sequence generation (selection bias) | Allocation concealment (selection bias) | Blinding of participants and personnel (performance bias) | Blinding of outcome assessment (detection bias) | Incomplete outcome data (attrition bias) | Selective reporting (reporting bias) | Attention | Compliance | Other bias |
|-----------------------|---------------------------------------------|-----------------------------------------|-----------------------------------------------------------|-------------------------------------------------|------------------------------------------|--------------------------------------|-----------|------------|------------|
| AlphaOmega - ALA 2011 | +                                           | +                                       | +                                                         | +                                               | +                                        | -                                    | +         | +          | +          |
| AlphaOmega - EPA+DHA  | +                                           | +                                       | +                                                         | +                                               | +                                        | -                                    | +         | +          | +          |
| AREDS2 2014           | +                                           | +                                       | +                                                         | +                                               | +                                        | +                                    | +         | ?          | +          |
| ASCEND 2018           | +                                           | +                                       | +                                                         | +                                               | +                                        | +                                    | +         | ?          | +          |
| Balfego 2016          | +                                           | ?                                       | -                                                         | ?                                               | +                                        | ?                                    | ?         | +          | +          |
| Baxheinrich 2012      | ?                                           | ?                                       | -                                                         | ?                                               | +                                        | ?                                    | +         | +          | +          |
| Bonnema 1995          | +                                           | +                                       | ?                                                         | ?                                               | +                                        | ?                                    | ?         | +          | +          |
| Burr 2003 - DART2     | ?                                           | ?                                       | -                                                         | +                                               | +                                        | ?                                    | -         | ?          | +          |
| Caldwell 2011         | +                                           | +                                       | +                                                         | +                                               | +                                        | +                                    | +         | ?          | +          |
| Clark 2016            | +                                           | +                                       | ?                                                         | +                                               | +                                        | ?                                    | +         | +          | +          |
| Connor 1993           | ?                                           | ?                                       | ?                                                         | ?                                               | +                                        | ?                                    | +         | ?          | +          |
| DART fat 1989         | +                                           | ?                                       | -                                                         | +                                               | +                                        | ?                                    | -         | ?          | +          |
| DART fish 1989        | +                                           | ?                                       | -                                                         | +                                               | +                                        | ?                                    | -         | ?          | +          |
| Dasarathy 2015        | ?                                           | ?                                       | +                                                         | +                                               | +                                        | ?                                    | +         | ?          | +          |
| DeFina 2010           | +                                           | +                                       | ?                                                         | ?                                               | +                                        | ?                                    | +         | +          | +          |
| Delamaire 1991        | ?                                           | ?                                       | ?                                                         | ?                                               | ?                                        | ?                                    | ?         | ?          | +          |
| de Luis 2016          | ?                                           | ?                                       | -                                                         | ?                                               | -                                        | +                                    | +         | +          | +          |
| Derosa 2009           | +                                           | ?                                       | -                                                         | ?                                               | ?                                        | ?                                    | +         | ?          | +          |
| Derosa 2011           | +                                           | ?                                       | ?                                                         | +                                               | ?                                        | ?                                    | ?         | ?          | +          |
| Derosa 2016           | +                                           | +                                       | +                                                         | +                                               | +                                        | ?                                    | +         | ?          | +          |
| Deslypere 1992        | +                                           | +                                       | -                                                         | +                                               | +                                        | ?                                    | +         | +          | +          |
| DIPP-Tokudome 2015    | +                                           | +                                       | ?                                                         | +                                               | +                                        | -                                    | +         | ?          | +          |
| Dodin 2005            | +                                           | ?                                       | +                                                         | +                                               | +                                        | ?                                    | +         | +          | +          |
| DO IT - Einvik 2010   | +                                           | ?                                       | ?                                                         | +                                               | +                                        | ?                                    | +         | +          | +          |

|                         |   |   |   |   |   |   |   |   |   |
|-------------------------|---|---|---|---|---|---|---|---|---|
| Dullaart 1992           | + | + | - | ? | ? | ? | - | - | + |
| Ebrahimi 2009           | ? | ? | - | ? | - | ? | - | ? | + |
| EPE-A 2014              | + | + | + | ? | - | + | + | + | + |
| EPOCH 2014              | + | + | + | + | ? | - | + | ? | + |
| Fakhrzadeh 2010         | ? | ? | ? | ? | ? | ? | ? | ? | + |
| Ferrara 2000            | ? | ? | ? | ? | + | ? | + | ? | + |
| Finnegan 2003           | + | ? | ? | ? | - | ? | + | + | + |
| Gill 2012               | ? | ? | ? | ? | ? | - | ? | ? | ? |
| GISSI-P 1999            | + | + | - | + | + | ? | + | ? | + |
| GLAMT 1993              | ? | ? | + | ? | - | ? | + | ? | + |
| Heine 1989              | ? | ? | ? | ? | - | ? | + | + | + |
| HERO-Tapsell 2009       | + | ? | - | ? | - | ? | + | - | + |
| Houtsmuller 1979        | ? | ? | ? | ? | ? | ? | ? | + | - |
| IFOMS- Sirtori 1997     | + | ? | ? | ? | + | ? | ? | ? | + |
| JELIS 2007              | + | + | - | + | + | ? | + | ? | + |
| Krebs 2006              | ? | ? | ? | ? | - | ? | + | + | + |
| Lalia 2015              | + | ? | ? | ? | - | + | + | - | + |
| Martinez 2014           | + | ? | ? | + | + | ? | + | ? | + |
| MENU - Rock 2016        | + | ? | - | ? | + | + | + | + | + |
| Mita 2007               | + | ? | - | + | + | ? | + | ? | + |
| Moore 2006              | + | ? | - | ? | + | ? | + | + | + |
| MUFFIN Miller 2016      | ? | ? | ? | ? | - | ? | + | ? | + |
| Nigam 2014              | + | ? | - | - | + | ? | + | ? | + |
| Niki 2016               | + | ? | - | ? | - | ? | + | ? | + |
| Nodari 2011 HF          | ? | ? | - | - | ? | ? | + | + | + |
| Nogueira 2016           | + | ? | ? | ? | + | ? | + | + | + |
| Nomura 2009             | ? | ? | ? | ? | ? | ? | ? | ? | + |
| Norwegian - Natvig 1968 | ? | ? | + | + | + | ? | + | ? | + |
| OFAMI - Nilsen 2001     | ? | + | + | + | ? | ? | + | ? | + |
| OPAL - Dangour 2010     | + | + | + | + | + | - | + | + | + |
| OPTILIP 2006            | ? | ? | - | ? | ? | ? | ? | + | + |
| ORIGIN 2012             | + | + | + | + | + | + | + | ? | + |

|                        |   |   |   |   |   |   |   |   |   |
|------------------------|---|---|---|---|---|---|---|---|---|
| ORL - Tatsuno 2013     | + | + | - | - | + | + | + | + | + |
| Patch 2005             | + | ? | + | + | ? | ? | + | ? | + |
| Pratt 2009             | ? | + | ? | + | - | + | + | ? | + |
| PREDIMED 2013          | - | - | - | + | + | - | + | ? | - |
| Proudman 2015          | + | + | + | + | + | ? | + | - | + |
| REDUCE-IT 2018         | + | ? | + | + | + | + | + | + | ? |
| Risk & Prevention 2013 | + | + | ? | + | + | - | ? | ? | + |
| Rose 1965              | + | ? | + | + | + | ? | + | - | + |
| Rossing 1996           | + | ? | + | ? | + | ? | + | + | + |
| Sandhu 2016            | + | ? | - | - | + | - | + | ? | + |
| Sasaki 2012            | ? | ? | ? | ? | + | - | ? | ? | + |
| Sawada 2016            | + | - | - | ? | + | + | + | + | + |
| Schirmer 2007          | ? | ? | + | + | - | ? | + | + | + |
| Shimizu 1995           | ? | - | - | ? | ? | ? | ? | ? | + |
| SHOT - Eritsland 1996  | + | ? | - | + | + | ? | + | + | + |
| SMART Tapsell 2013     | + | + | - | ? | + | - | ? | - | + |
| Smith 2015             | ? | ? | ? | ? | - | + | ? | ? | + |
| Sofi 2010              | ? | ? | ? | ? | ? | ? | + | ? | + |
| Spadaro 2008           | ? | ? | - | ? | + | ? | + | ? | + |
| Tande 2016             | + | ? | + | + | + | ? | + | ? | + |
| Tapsell 2004           | ? | ? | - | ? | + | ? | ? | - | + |
| Tardivo 2015           | + | ? | - | ? | - | ? | + | ? | + |
| THIS DIET 2008         | + | ? | - | + | + | - | + | ? | + |
| Veleba 2015            | + | ? | ? | ? | - | - | ? | + | + |
| Vijayakumar 2014       | + | ? | ? | ? | + | ? | + | ? | + |
| Wang 2016              | + | ? | + | ? | + | - | + | + | + |
| WELCOME 2014           | + | + | + | + | + | ? | + | + | + |
| Witte 2012             | + | ? | ? | + | + | + | + | + | + |
| Zheng 2016             | + | ? | ? | + | ? | + | + | + | + |

Footnote:

+ means low risk of bias for that study/domain

- means high risk of bias for that study/domain

? means unclear risk of bias for that study/domain

Reasoning behind decisions in this table are given in Additional Table 1.



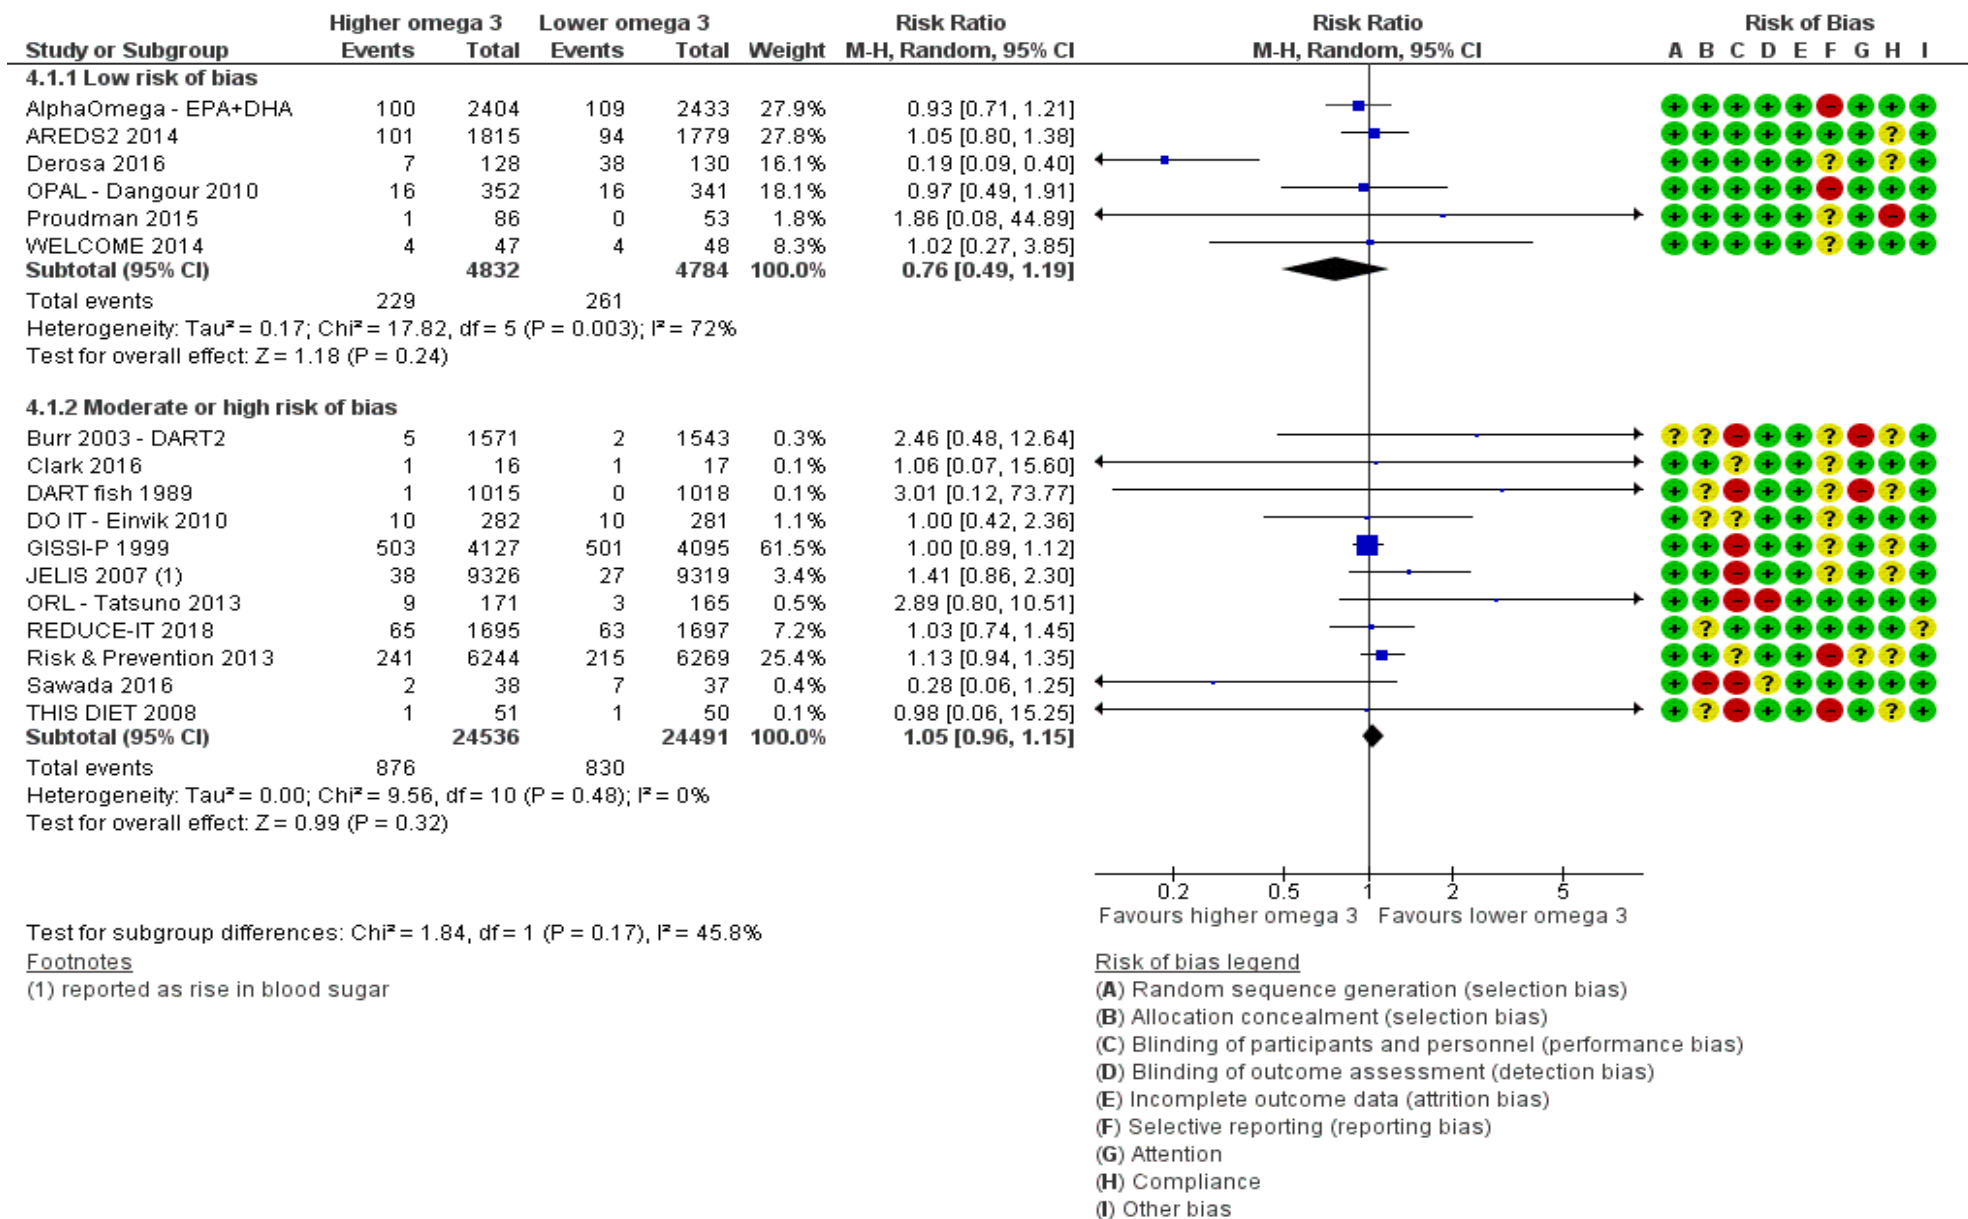

Supplementary Figure B. Meta-analysis of effects of LCn3 on type 2 diabetes diagnosis. Sensitivity analysis by summary risk of bias.

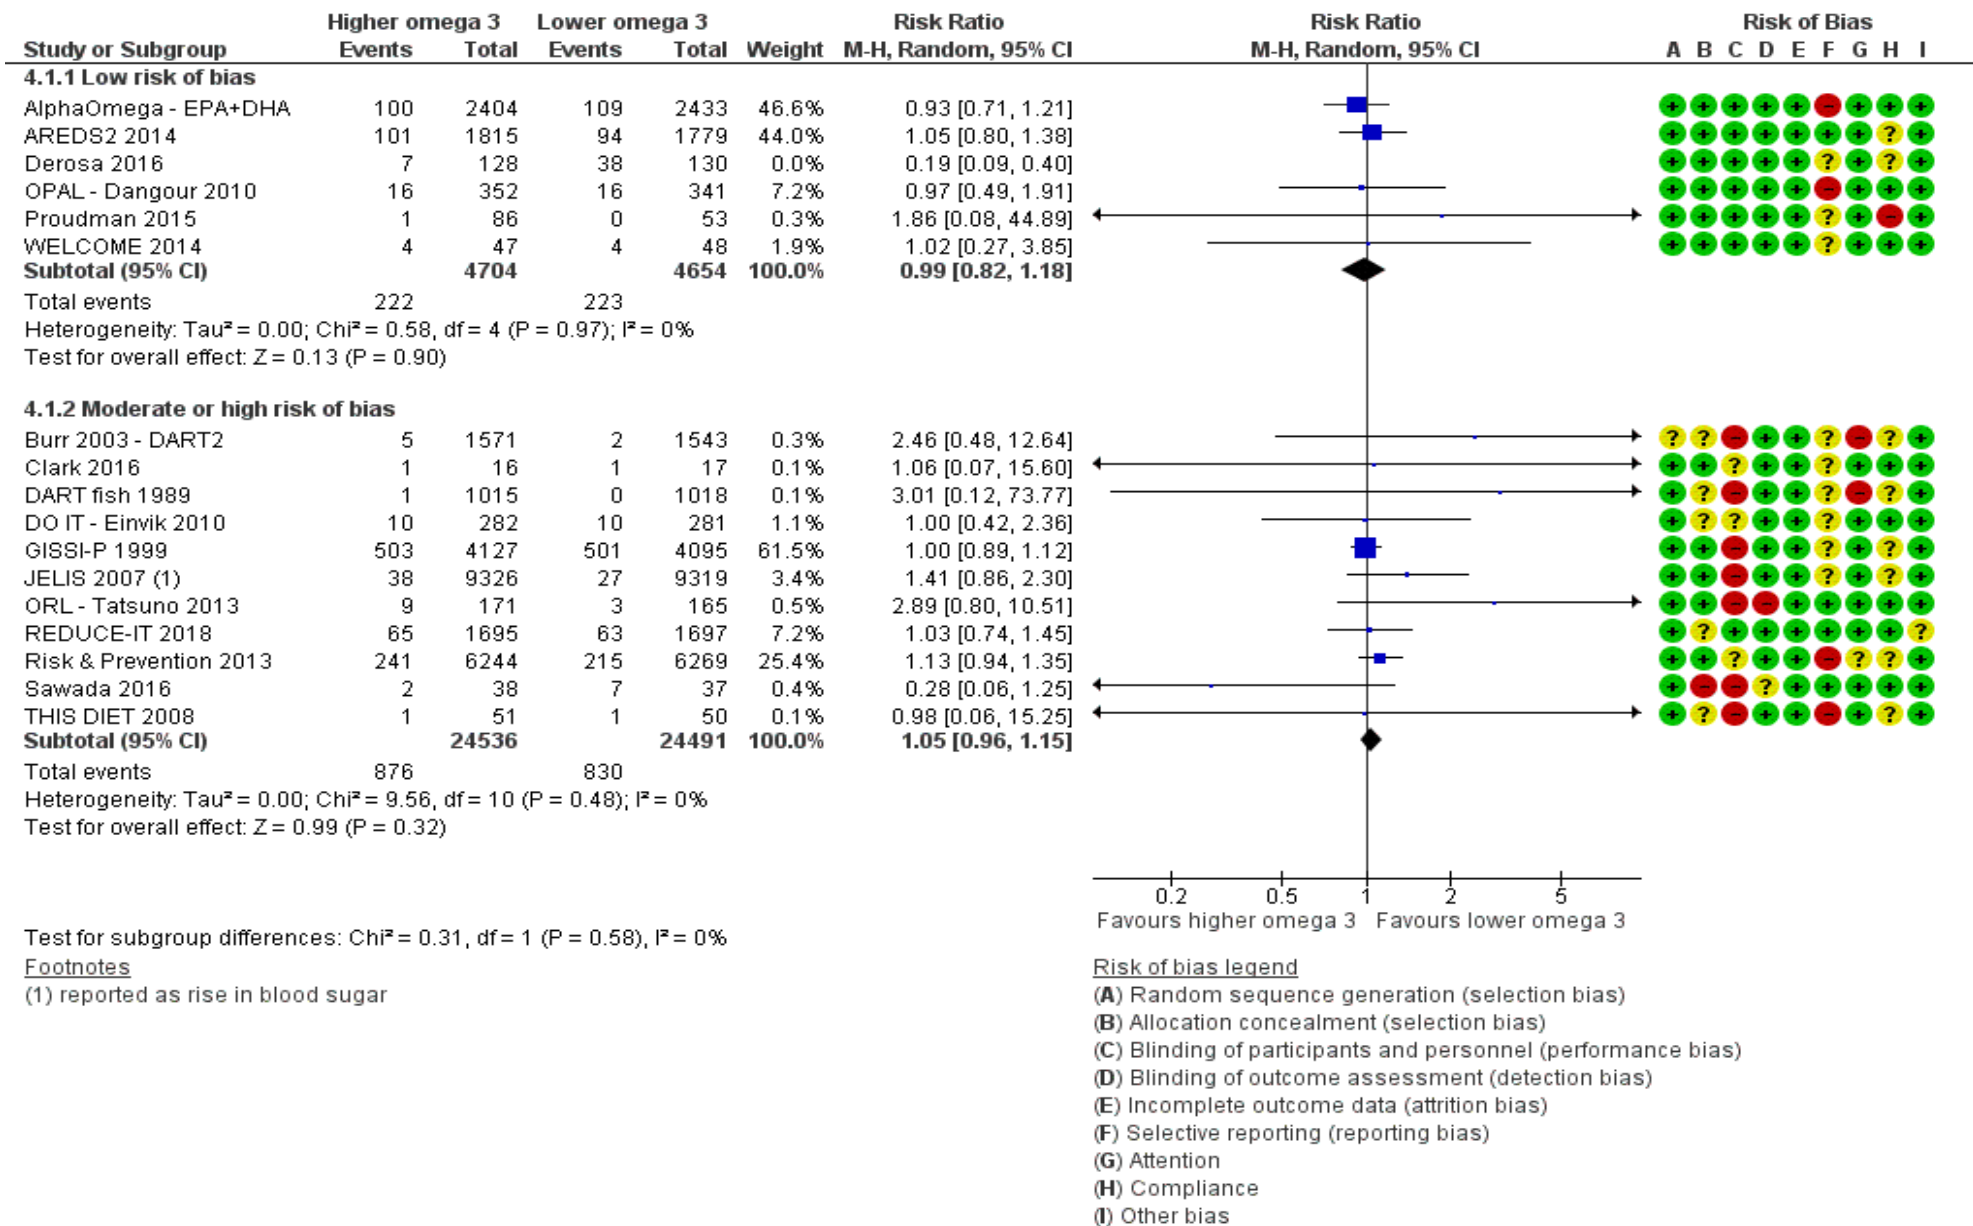

**Supplementary Figure C. Meta-analysis of effects of LCn3 on type 2 diabetes diagnosis. Sensitivity analysis by summary risk of bias, omitting Derosa 2016.**

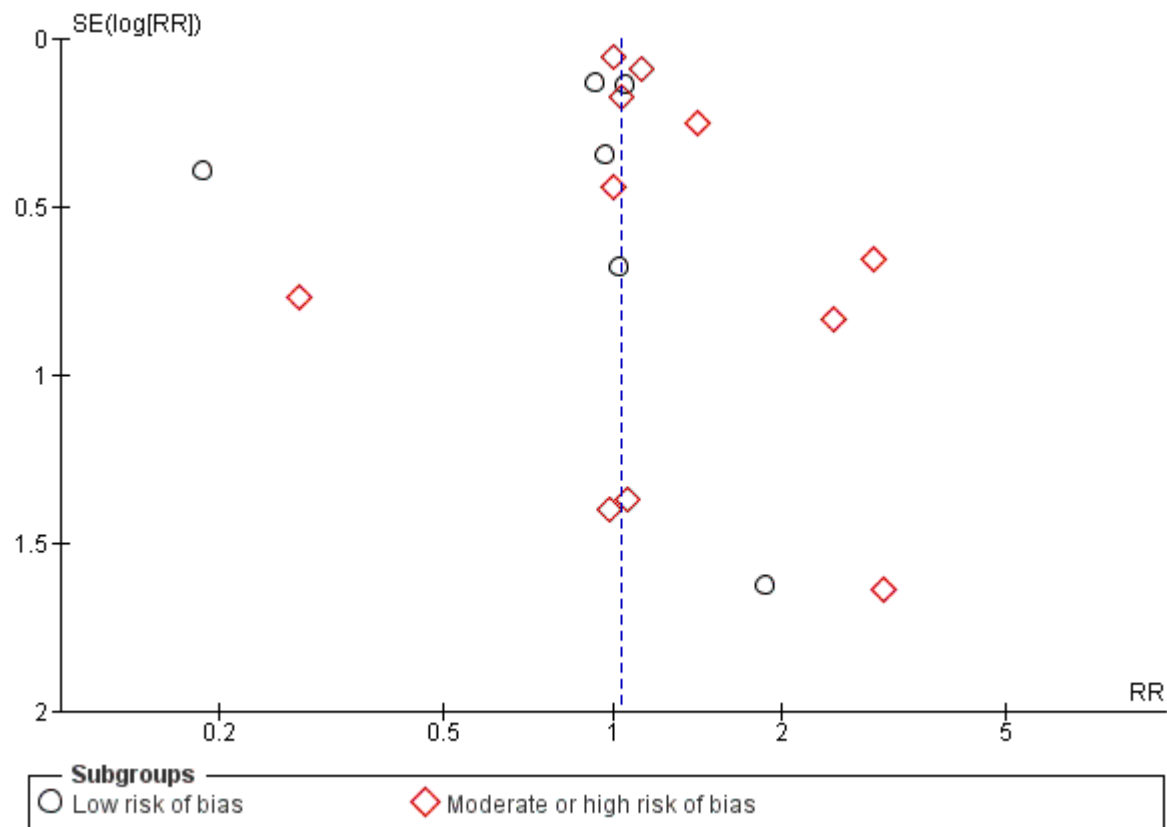

**Supplementary Figure D. Funnel plot of effects of LCN3 on type 2 diabetes diagnosis. Several small trials with results suggesting that increased LCN3 is associated with reduced risk of diabetes diagnosis may be missing. Adding these trials back in would tend to reduce the RR a small amount.**

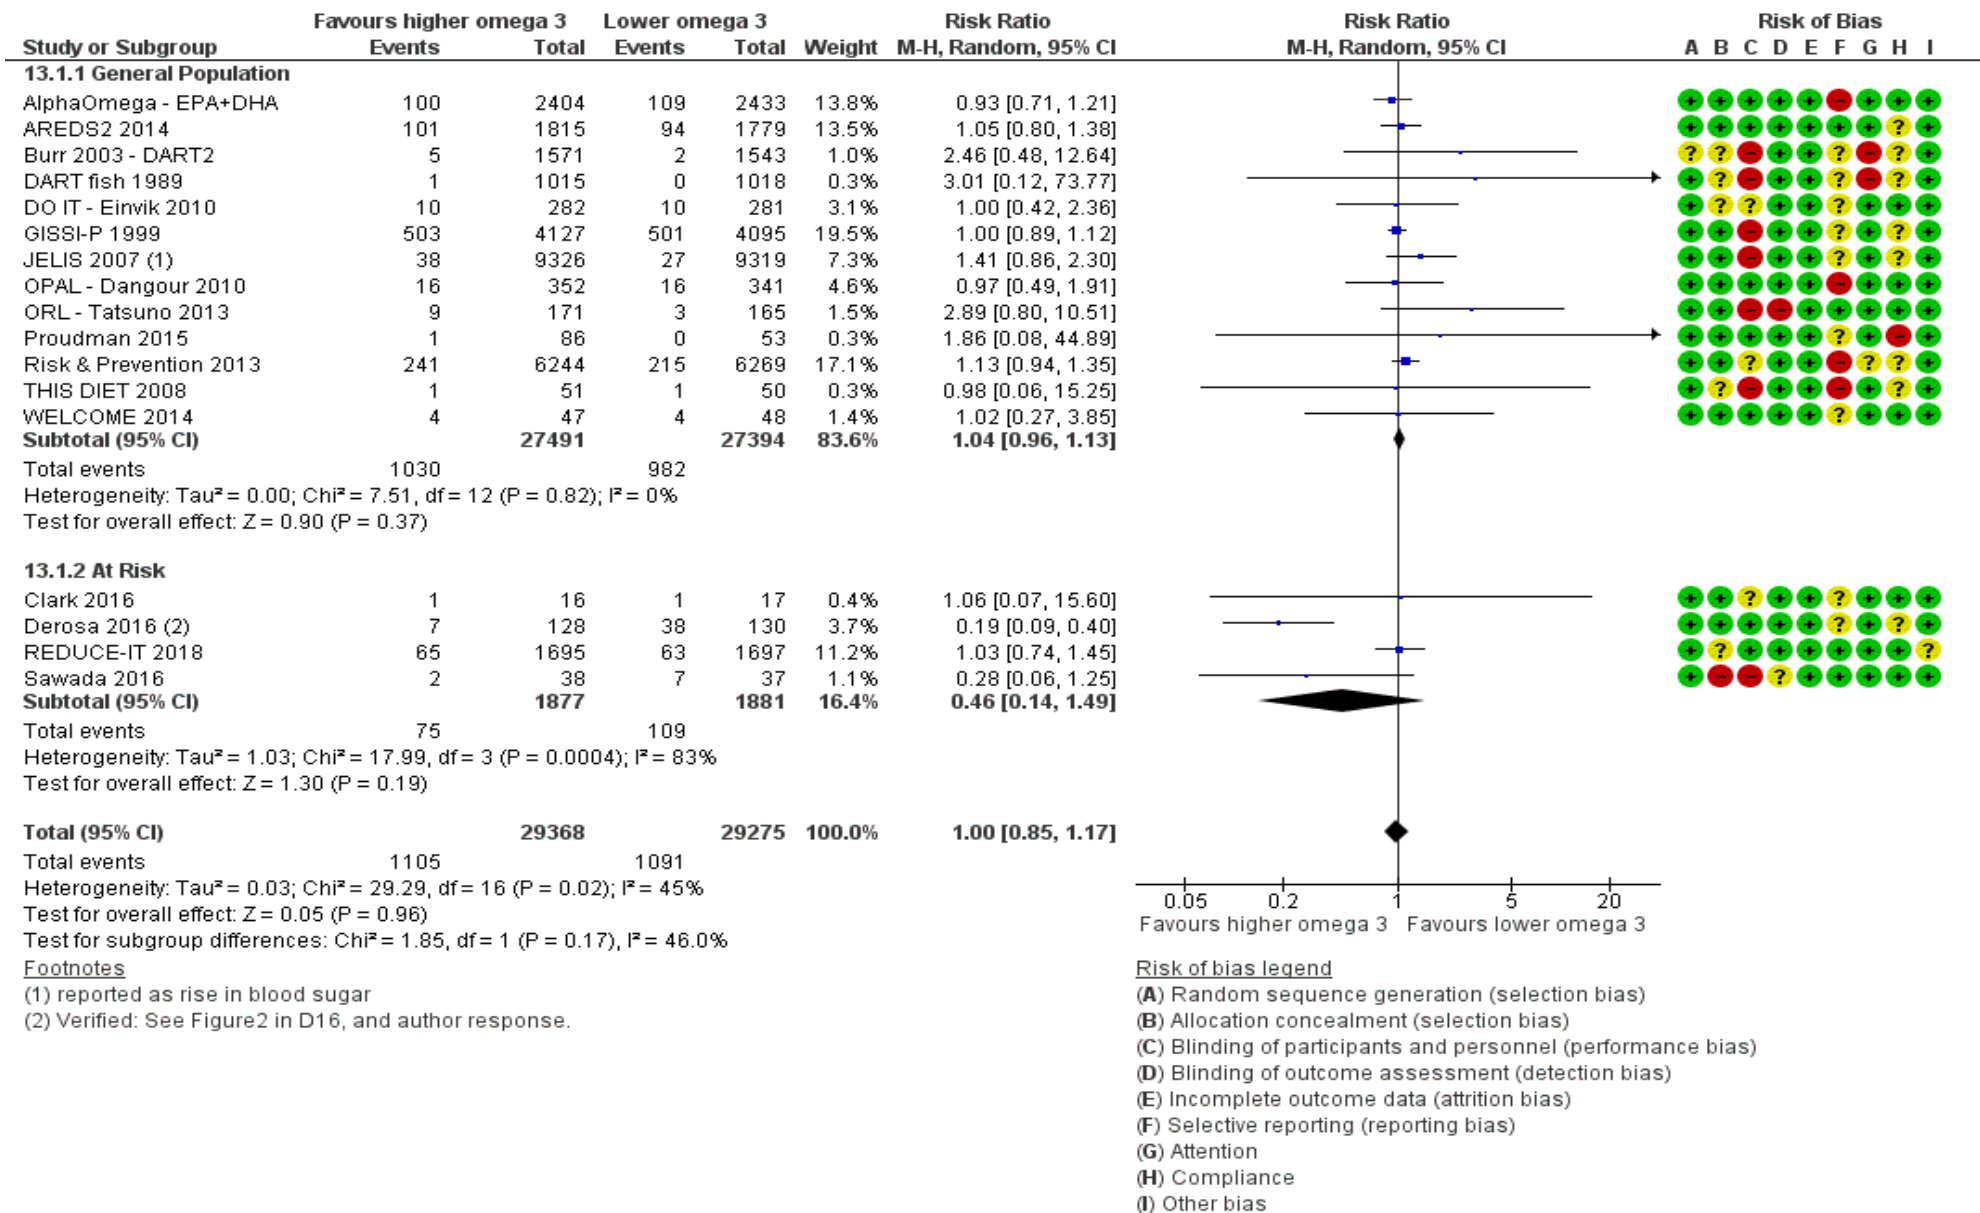

**Supplementary Figure E. Meta-analysis of effects of LCn3 on type 2 diabetes diagnosis. Subgroup analysis assessing effects by baseline diabetes risk**

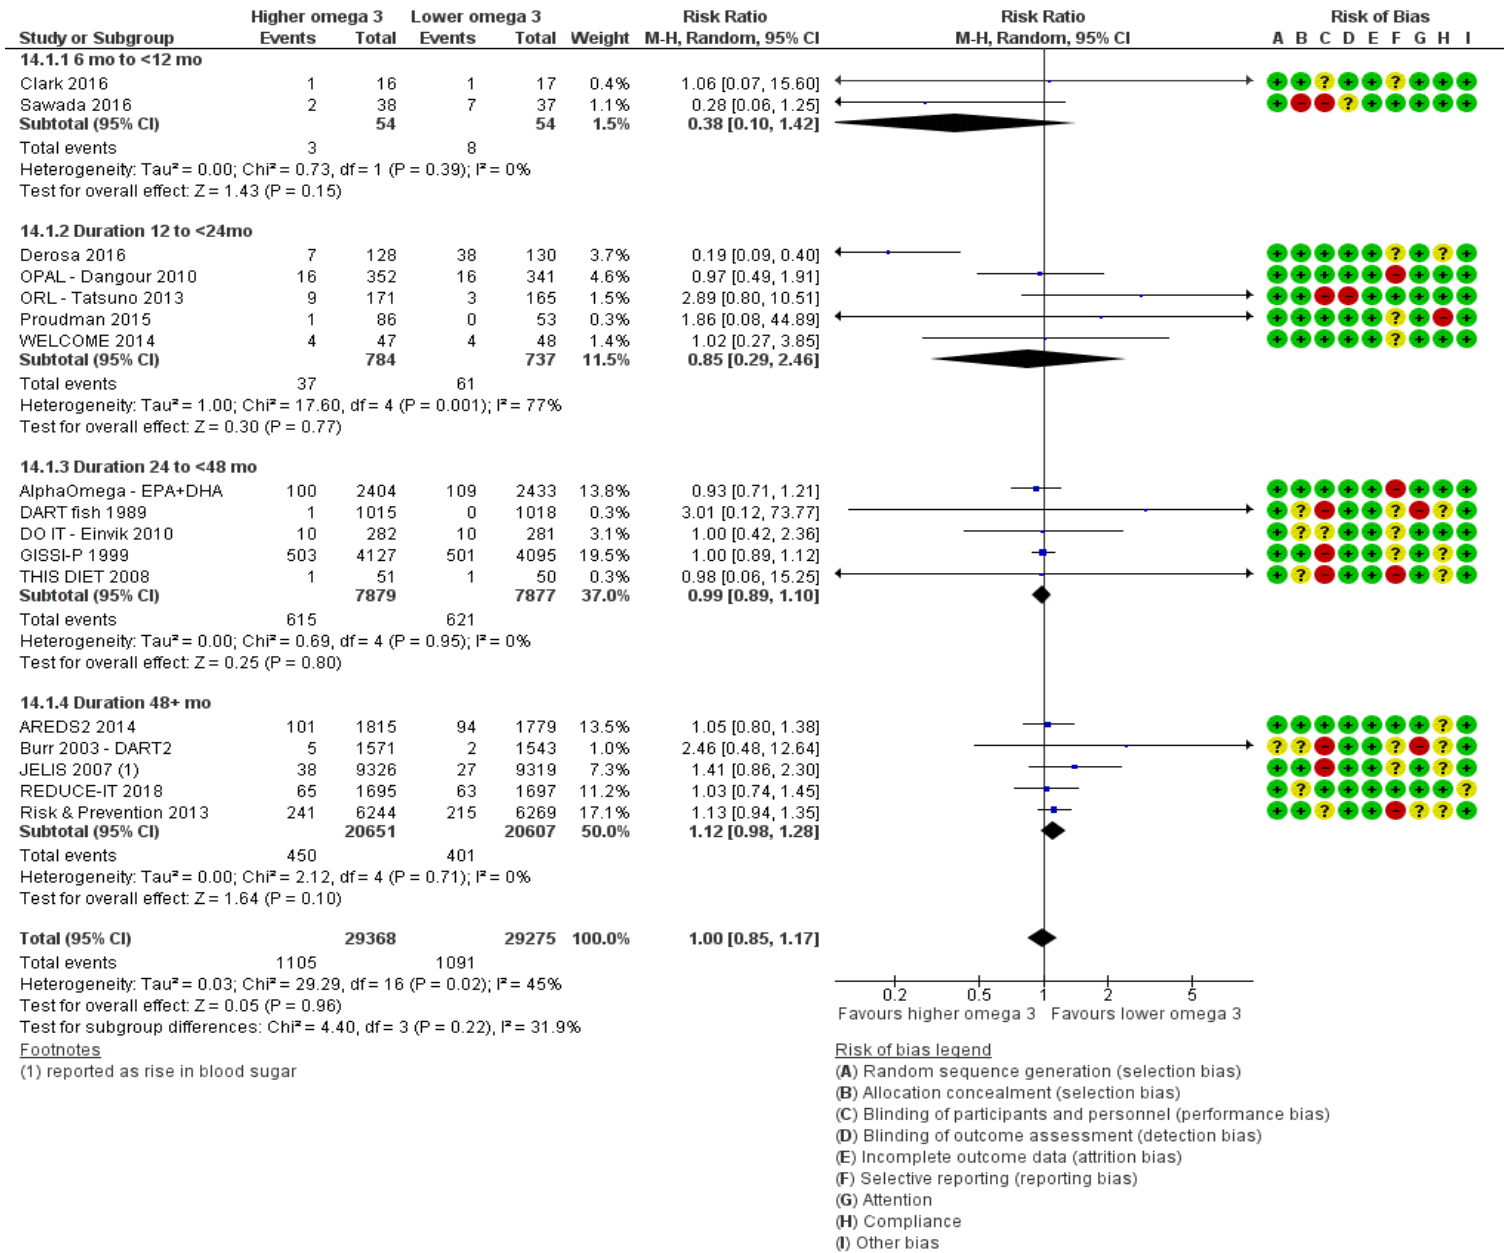

Supplementary Figure F. Meta-analysis of effects of LCn3 on risk of type 2 diabetes diagnosis, subgrouping by trial duration.

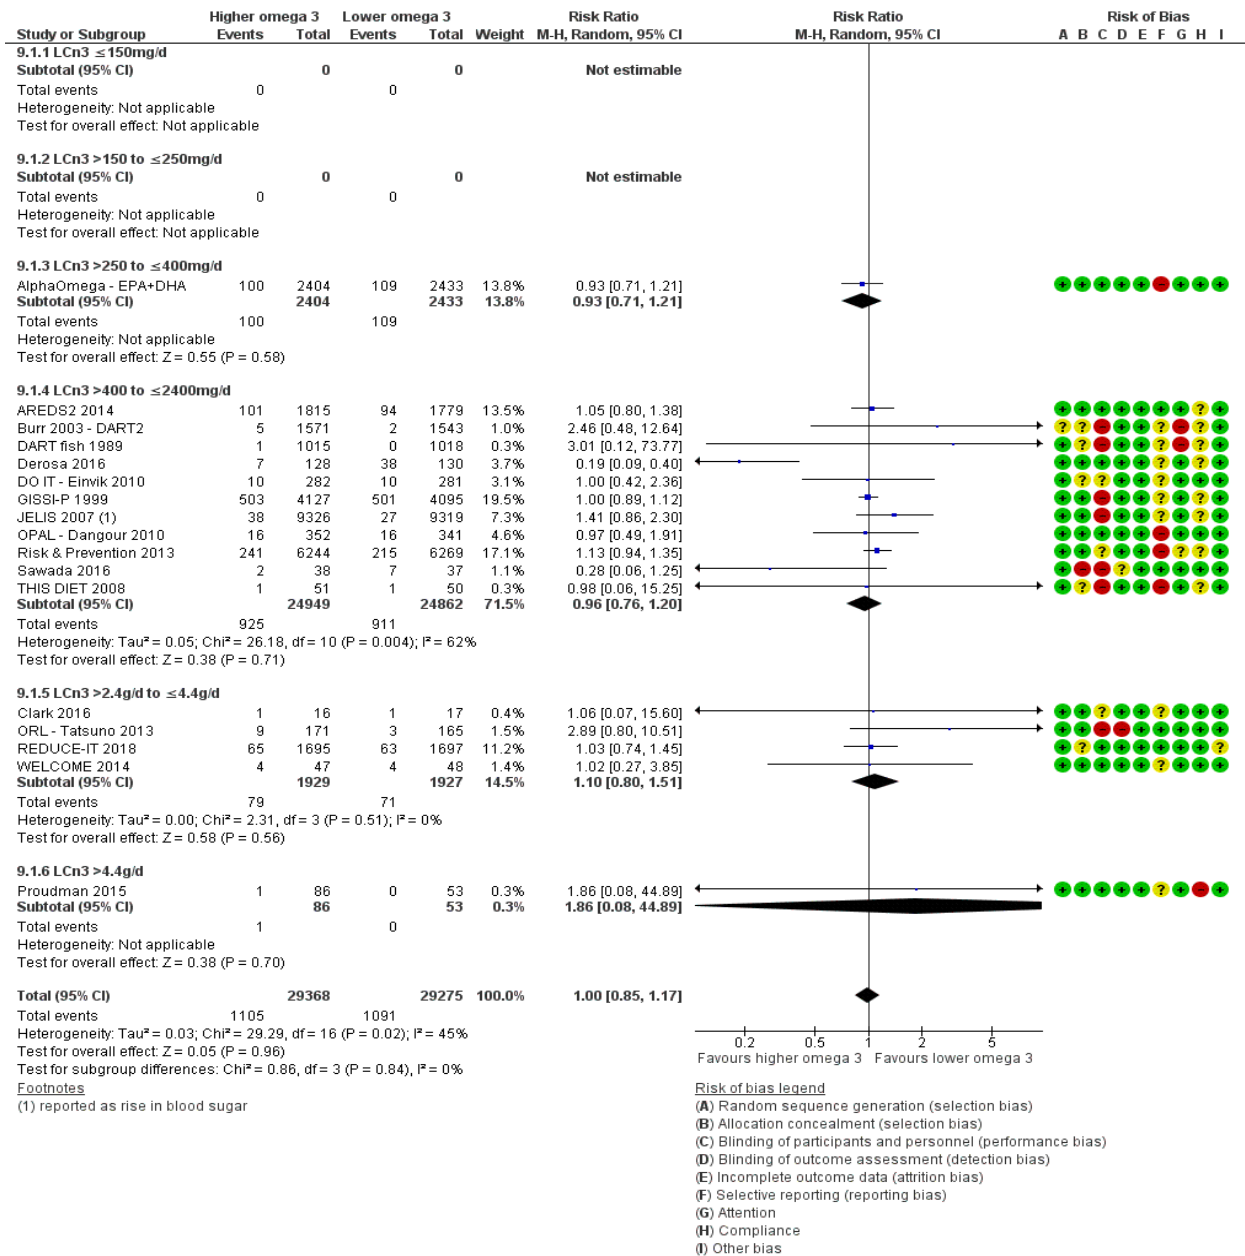

Supplementary Figure G. Meta-analysis of effects of LCn3 on risk of type 2 diabetes diagnosis, subgrouping by LCn3 dose.

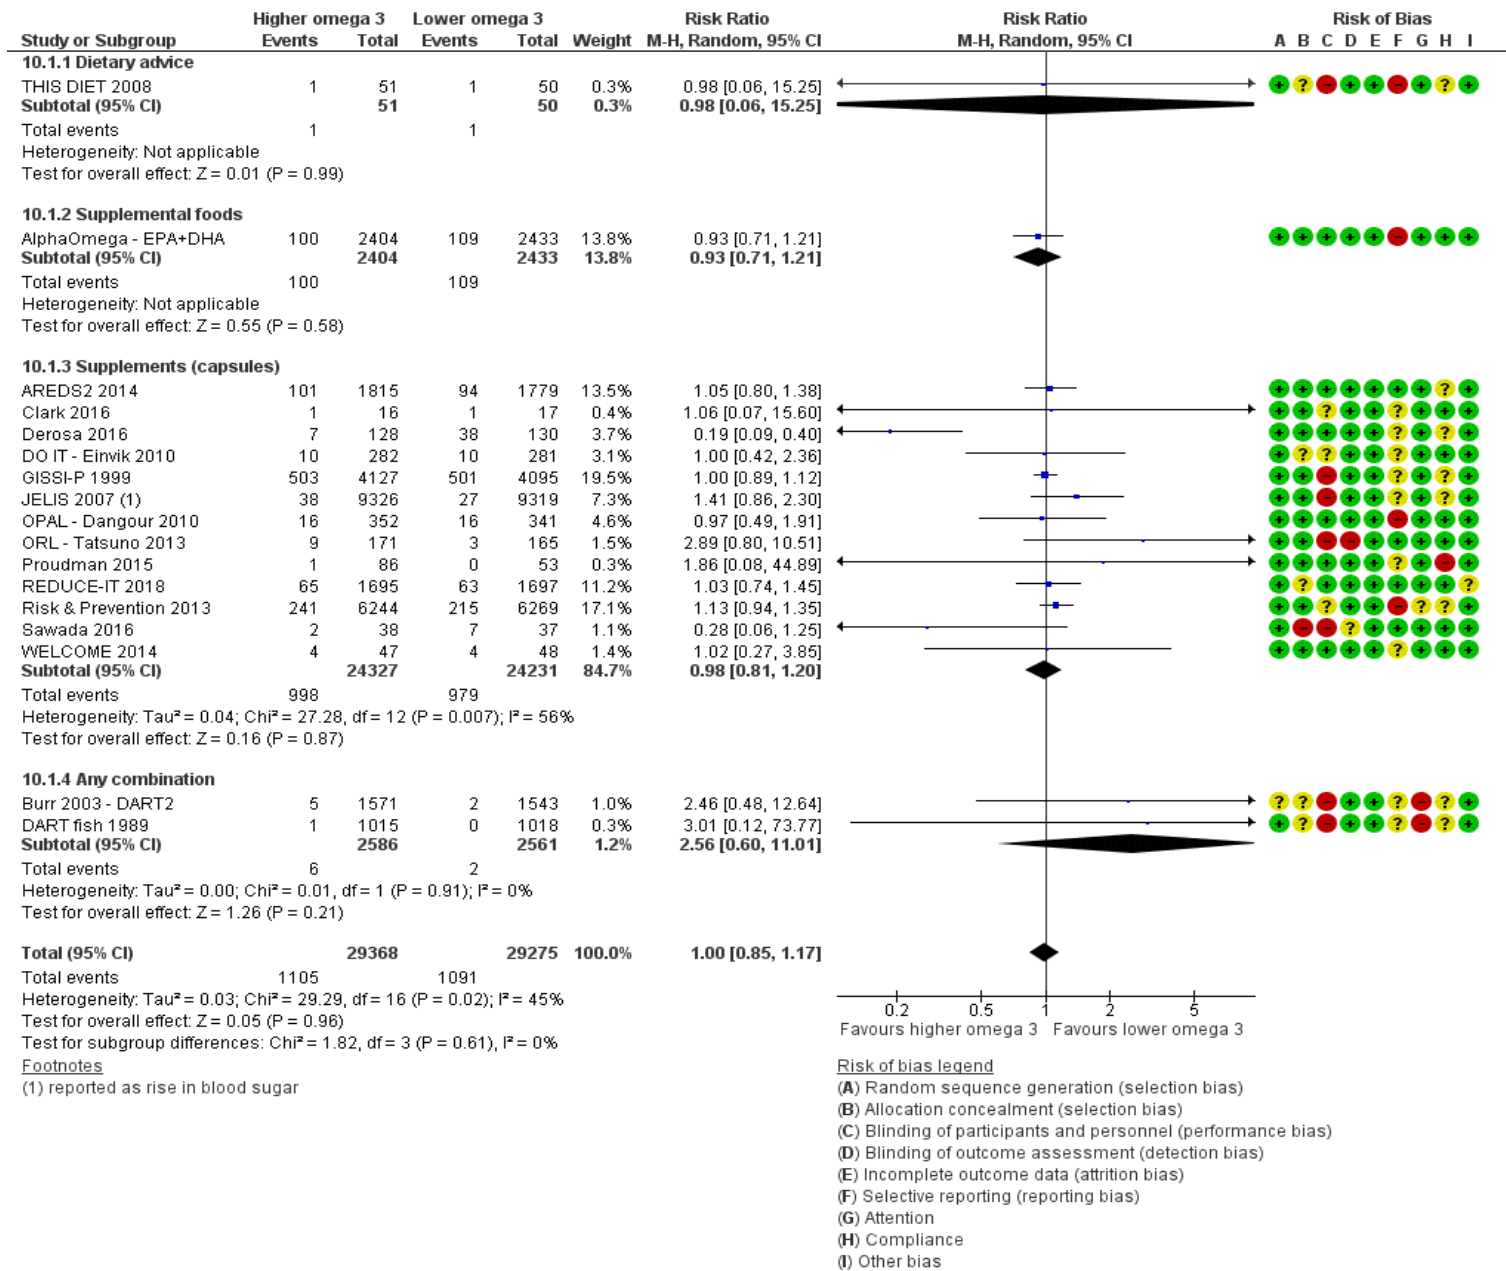

Supplementary Figure H. Meta-analysis of effects of LCN3 on risk of type 2 diabetes diagnosis, subgrouping by type of intervention.

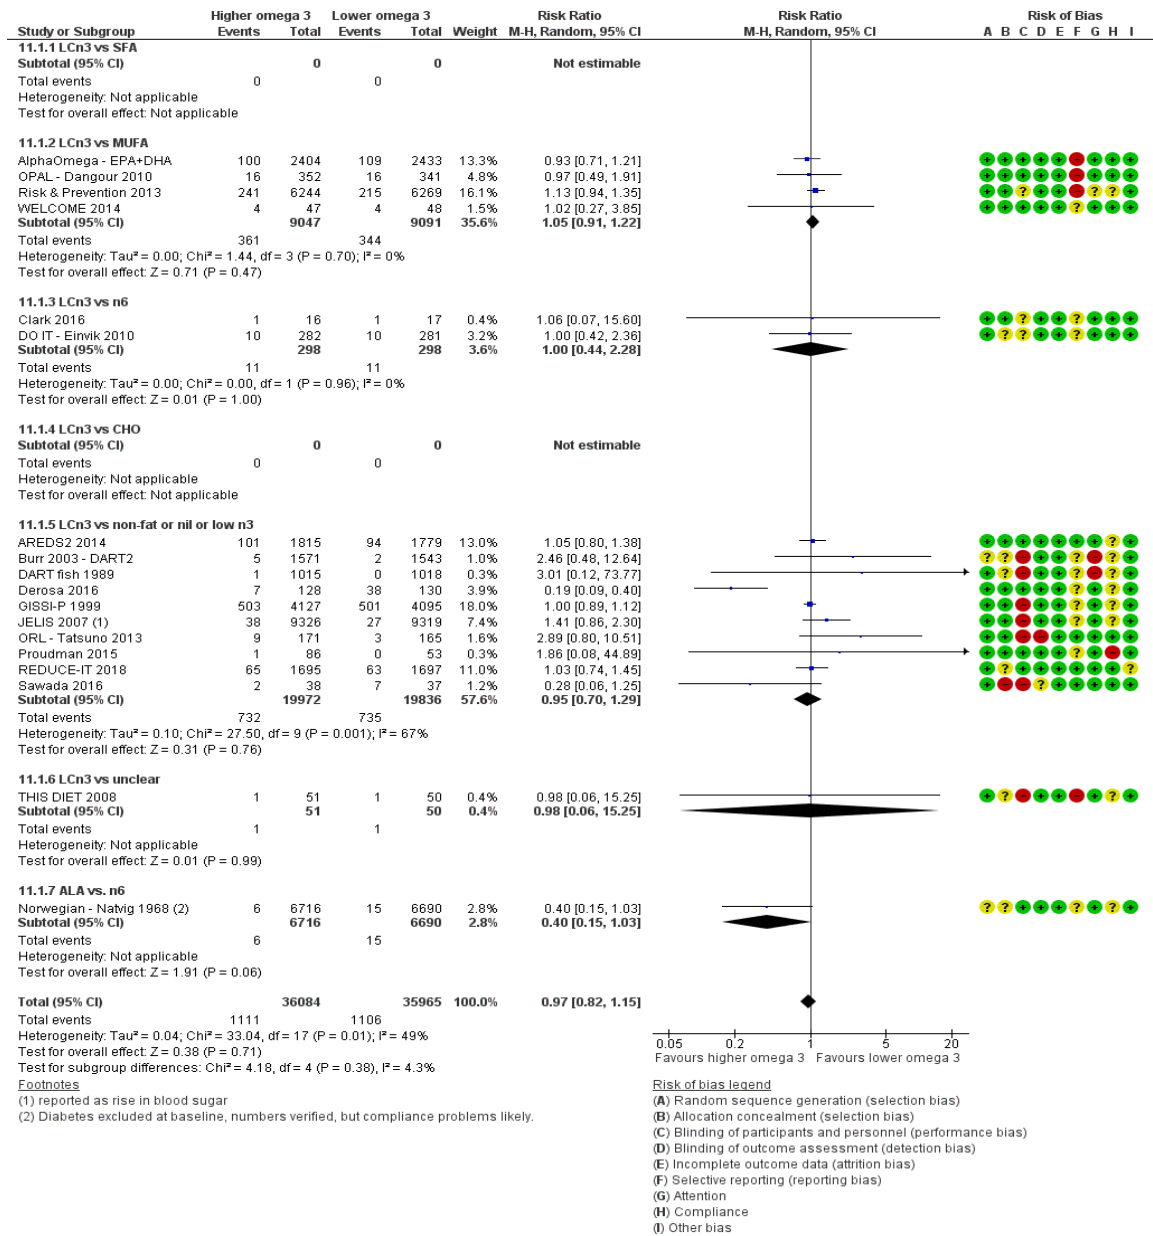

**Supplementary Figure I. Meta-analysis of effects of LCn3 on risk of type 2 diabetes diagnosis, subgrouping by macronutrient replaced by LCn3.**



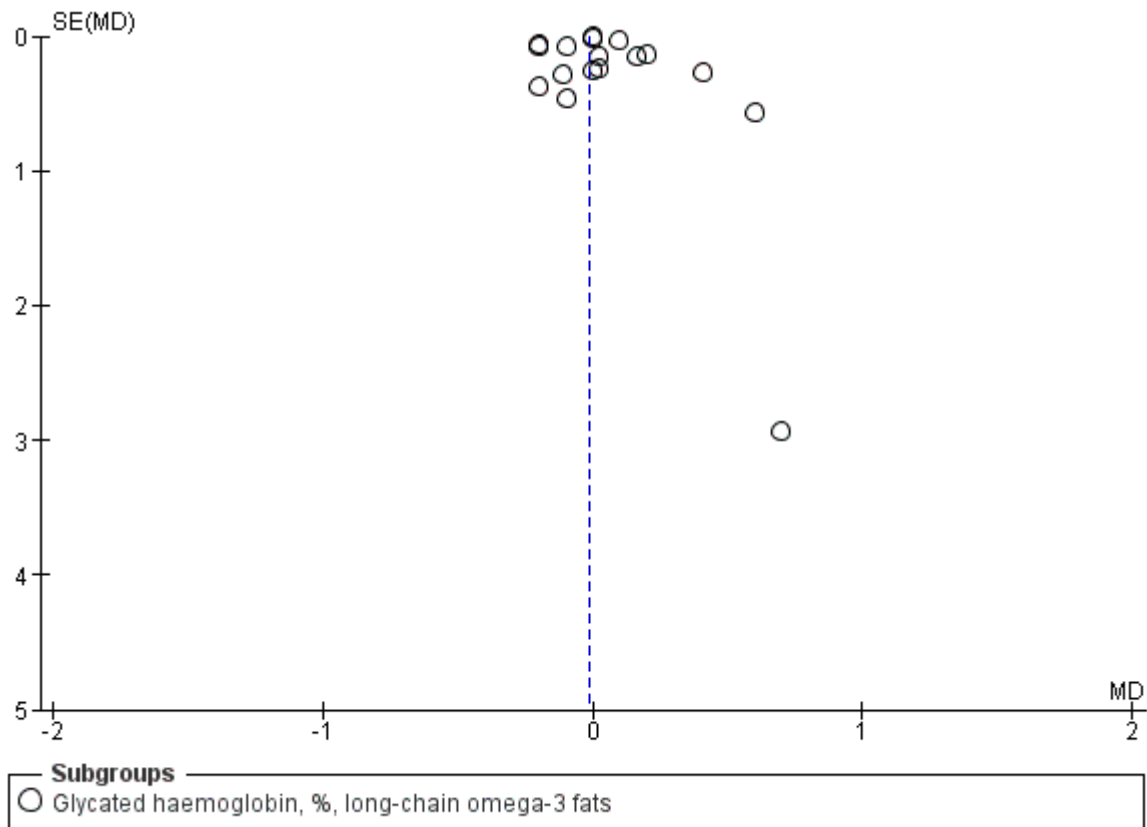

**Supplementary Figure J. Funnel plot of effects of LCn3 on HbA1c. This is difficult to interpret, but does not clearly suggest publication bias.**







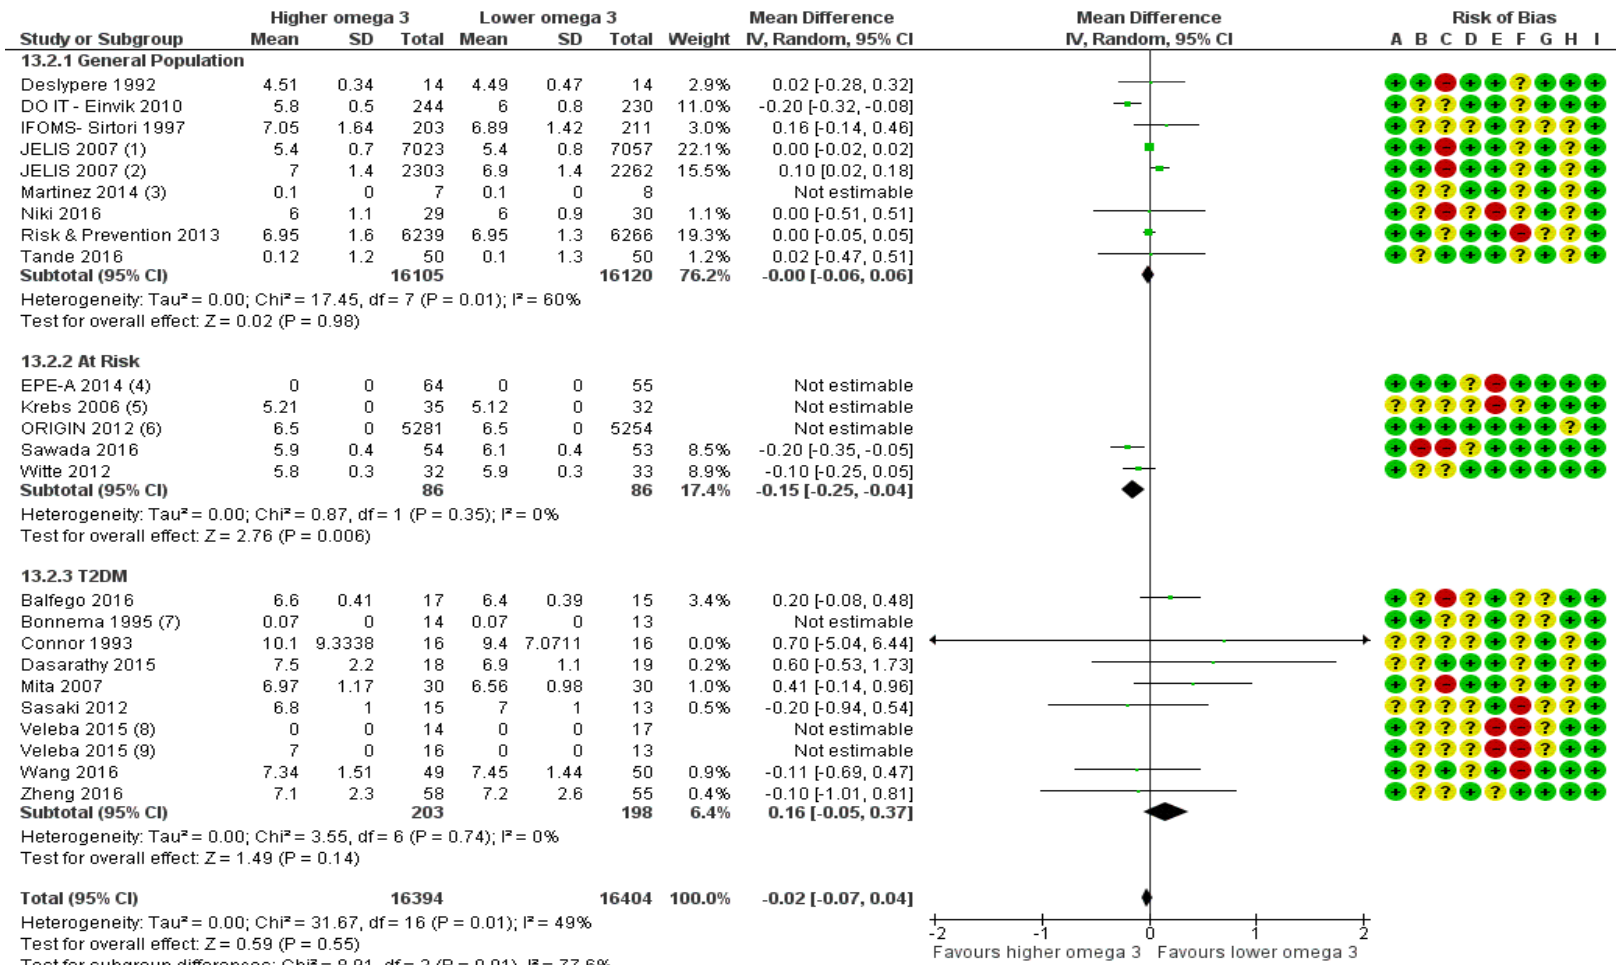

**Footnotes**

- (1) In participants normoglycaemic at baseline
- (2) In participants with impaired glucose metabolism at baseline
- (3) change in median over 12 months
- (4) median change from baseline (zero in both arms), highest EPA vs placebo
- (5) Geometric means
- (6) Medians only provided
- (7) Units unclear, so SDs not used as they weigh the study too much
- (8) Median change n-3+Plo vs Plo
- (9) Median change n-3 v placebo

**Risk of bias legend**

- (A) Random sequence generation (selection bias)
- (B) Allocation concealment (selection bias)
- (C) Blinding of participants and personnel (performance bias)
- (D) Blinding of outcome assessment (detection bias)
- (E) Incomplete outcome data (attrition bias)
- (F) Selective reporting (reporting bias)
- (G) Attention
- (H) Compliance
- (I) Other bias

**Supplementary Figure N. Meta-analysis of effects of LCn3 on HbA1c, %, subgrouping by baseline risk of diabetes.**

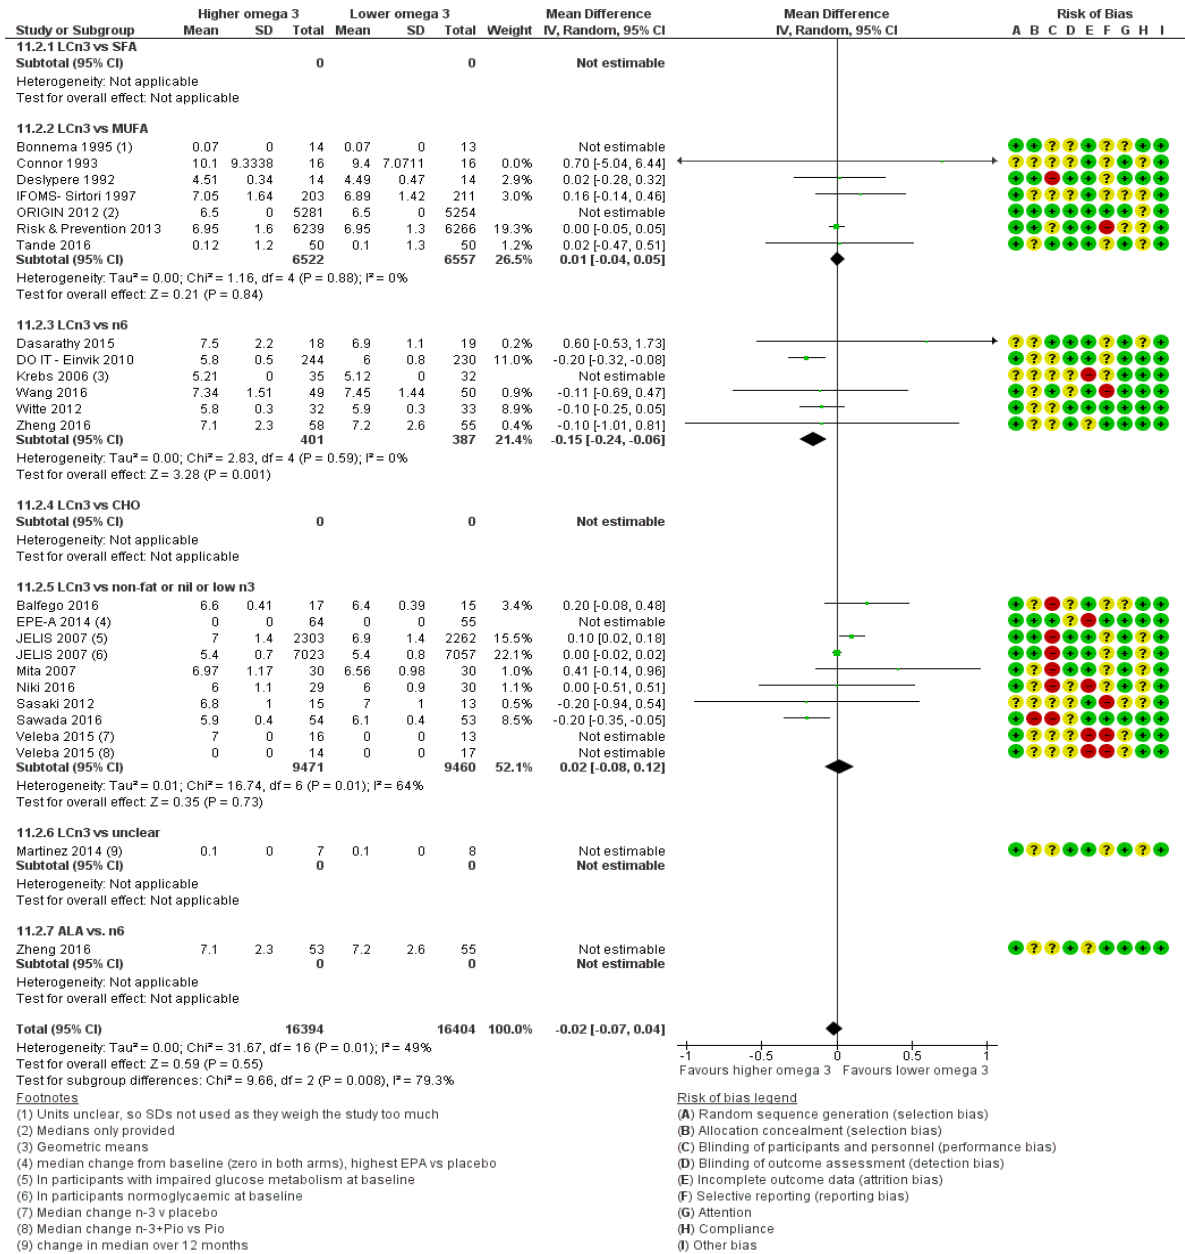

Supplementary Figure O. Meta-analysis of effects of LCn3 on HbA1c, %, subgrouping by intervention type.

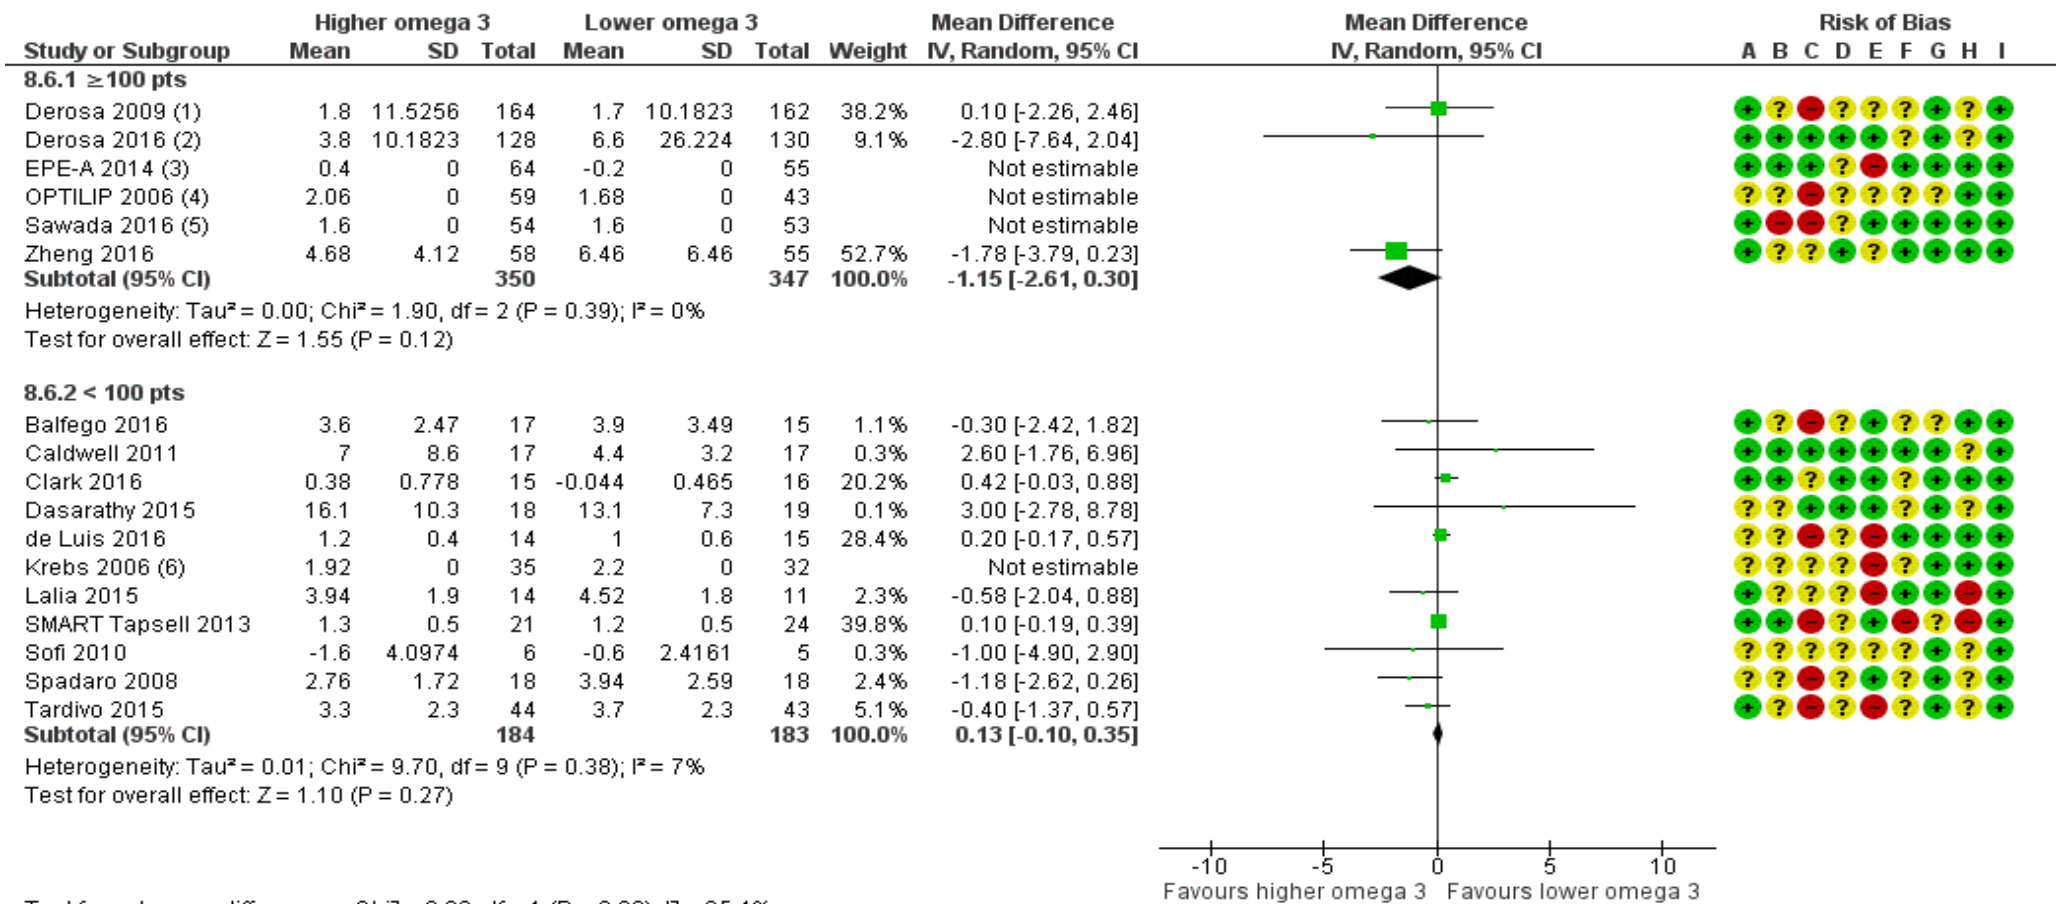

Test for subgroup differences: Chi<sup>2</sup> = 2.89, df = 1 (P = 0.09), I<sup>2</sup> = 65.4%

**Footnotes**

- (1) Assumed reported SDs were actually SEs
- (2) Assumed reported SDs were actually SEs
- (3) median change from baseline, highest EPA vs placebo
- (4) Geometric means
- (5) Medians
- (6) Geometric means

**Risk of bias legend**

- (A) Random sequence generation (selection bias)
- (B) Allocation concealment (selection bias)
- (C) Blinding of participants and personnel (performance bias)
- (D) Blinding of outcome assessment (detection bias)
- (E) Incomplete outcome data (attrition bias)
- (F) Selective reporting (reporting bias)
- (G) Attention
- (H) Compliance
- (I) Other bias

**Supplementary Figure P. Meta-analysis of effects of LCn3 on HOMA-IR, sensitivity analysis by study size (≥100 participants randomised)**

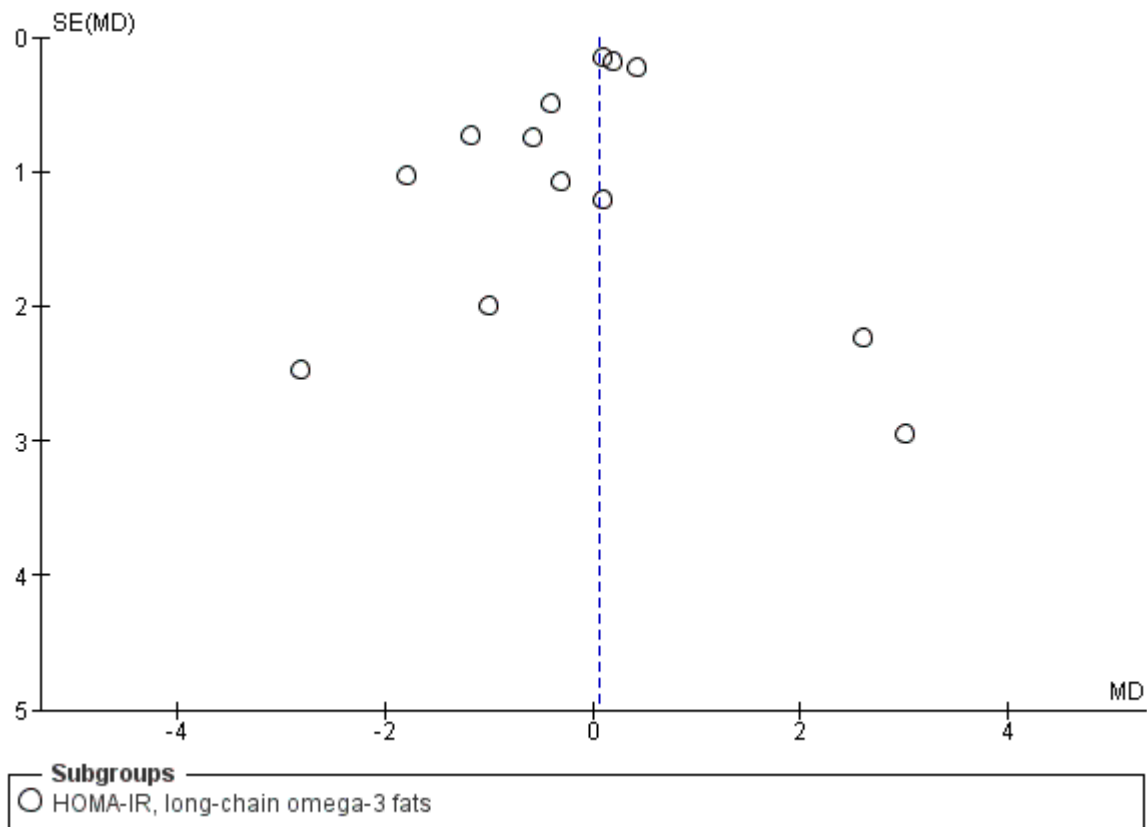

**Supplementary Figure Q. Funnel plot of effects of LCn3 on HOMA-IR, suggesting that some trials where raising LCn3 increased HOMA-IR may be missing. Adding these trials in would tend to increase the mean difference.**



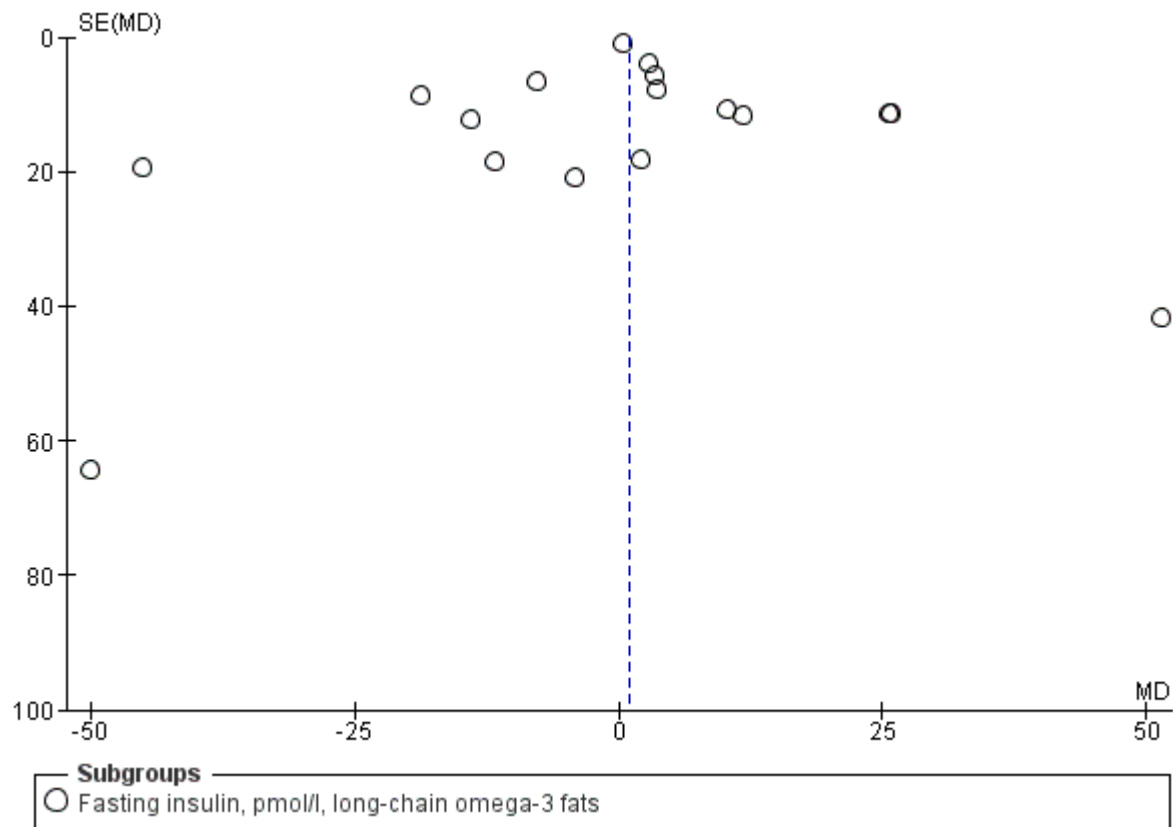

**Supplementary Figure R. Funnel plot of effects of LCn3 on fasting serum insulin, difficult to interpret but suggesting little publication bias.**

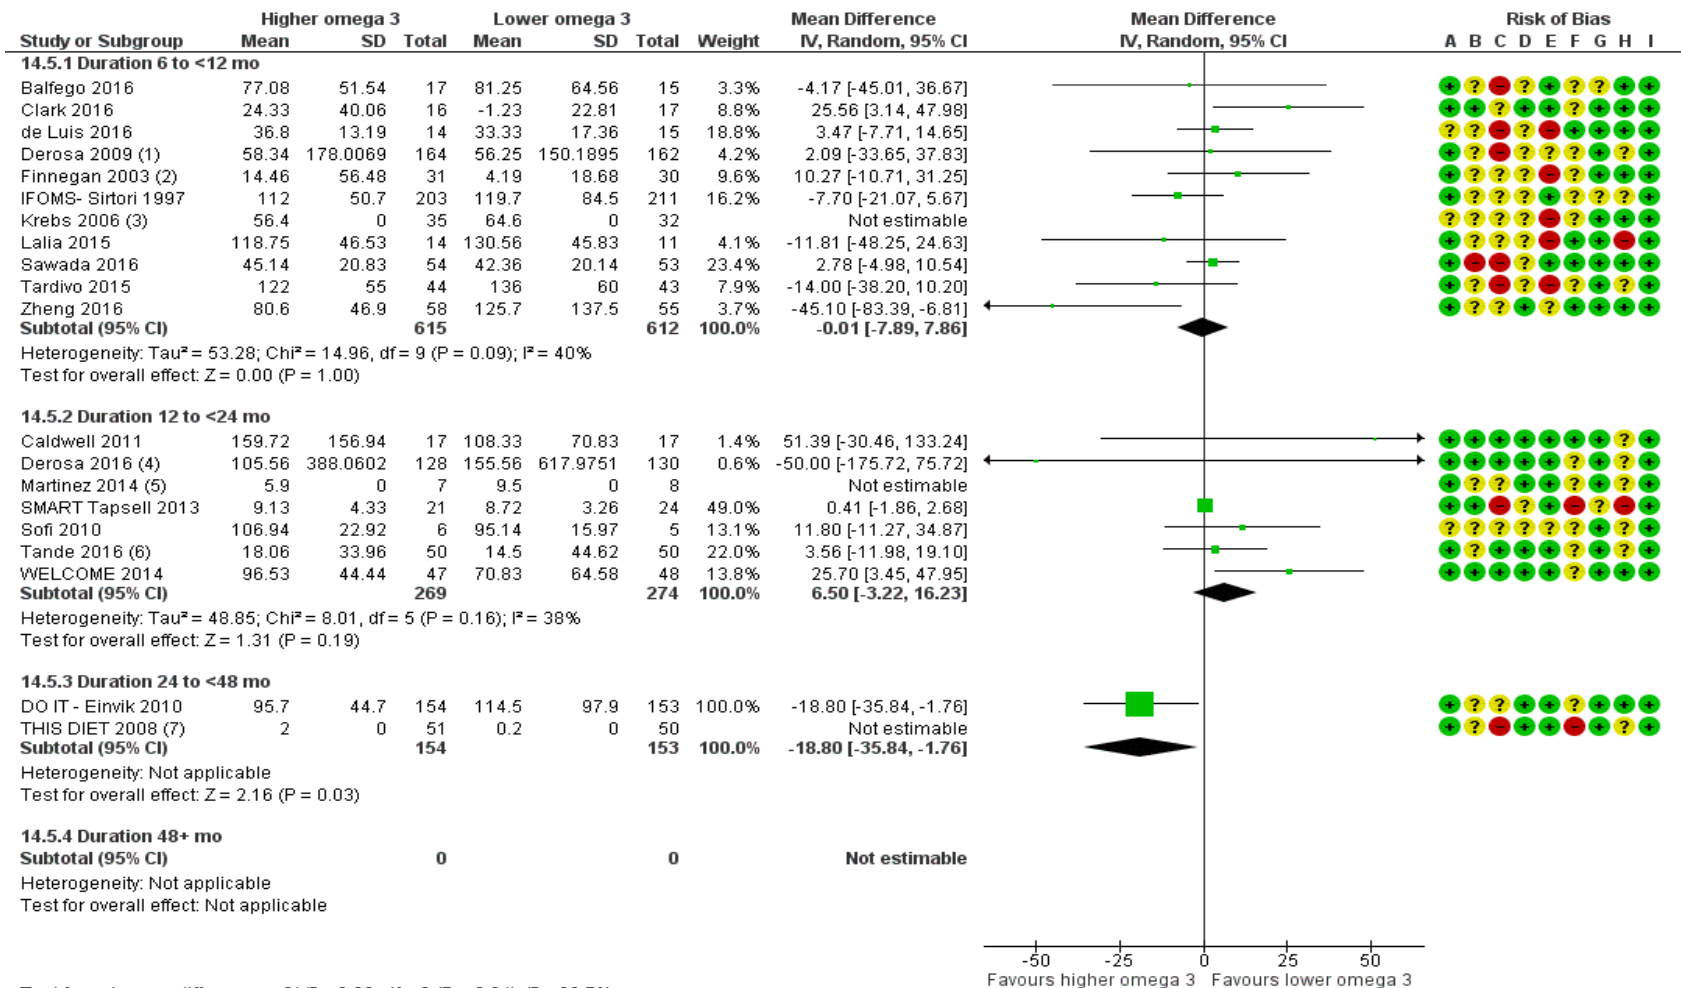

**Footnotes**

- (1) Assumed reported SDs were actually SEs
- (2) Comparing change in highest EPA+DHA arm with control
- (3) Geometric means
- (4) Assumed reported SDs were actually SEs
- (5) change in median over 12 months
- (6) change from baseline to 12 months
- (7) change, no SDs supplied

**Risk of bias legend**

- (A) Random sequence generation (selection bias)
- (B) Allocation concealment (selection bias)
- (C) Blinding of participants and personnel (performance bias)
- (D) Blinding of outcome assessment (detection bias)
- (E) Incomplete outcome data (attrition bias)
- (F) Selective reporting (reporting bias)
- (G) Attention
- (H) Compliance
- (I) Other bias

**Supplementary Figure S. Meta-analysis of effects of LCn3 on fasting serum insulin, subgrouping by trial duration. While there are statistically significant differences between subgroups there is no trend (effects neither strengthen nor weaken as trials lengthen).**

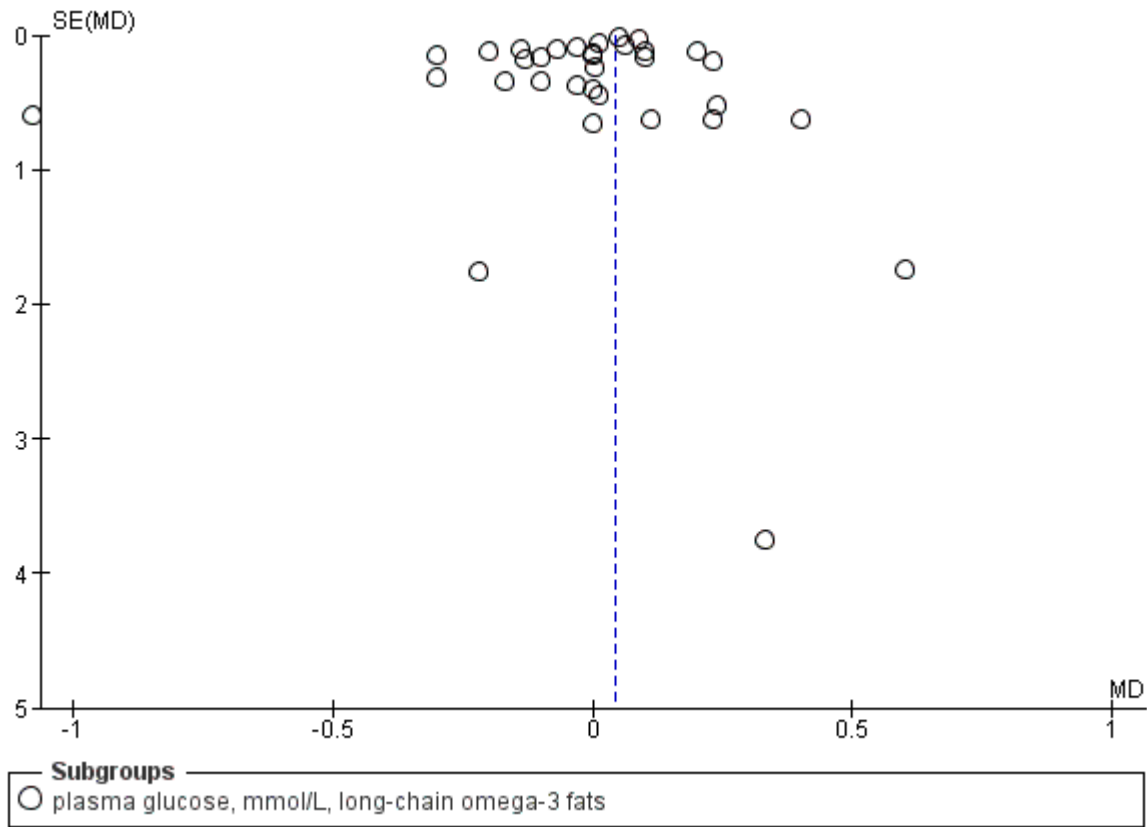

**Supplementary Figure T. Funnel plot of effects of LCn3 on fasting glucose, difficult to interpret but suggesting little publication bias.**

## References

1. Hooper L, Abdelhamid A, Brainard JS, et al. Creation of a database to assess effects of omega-3, omega-6 and total polyunsaturated fats on health: database and methodology for a set of reviews. *BMJ Open* 2019;accepted 22Feb2019
2. Kromhout D, Giltay EJ, Geleijnse JM. N-3 fatty acids and cardiovascular events after myocardial infarction. *N Engl J Med* 2010;363(18):2015-26.
3. Writing Group for the AREDS Research Group, Bonds DE, Harrington M, et al. Effect of long-chain omega-3 fatty acids and lutein + zeaxanthin supplements on cardiovascular outcomes: results of the Age-Related Eye Disease Study 2 (AREDS2) randomized clinical trial. *JAMA Intern Med* 2014;174(5):763-71.
4. Caldwell SH, Argo CK, Henry TD, et al. Dissociated histological and metabolic effects of omega-3 (3000 mg/d) versus placebo with both exercise and diet in a double-blind randomized controlled trial of NASH. *J Hepatol* 2011;54:S8.
5. Derosa G, Cicero AF, D'Angelo A, et al. Effects of n-3 PUFAs on fasting plasma glucose and insulin resistance in patients with impaired fasting glucose or impaired glucose tolerance. *BioFactors* 2016;42(3):316-22.
6. Danthiir V, Burns NR, Nettelbeck T, et al. The older people, omega-3, and cognitive health (EPOCH) trial design and methodology: a randomised, double-blind, controlled trial investigating the effect of long-chain omega-3 fatty acids on cognitive ageing and wellbeing in cognitively healthy older adults. *Nutr J* 2011;10:117.
7. Dangour AD, Allen E, Elbourne D, et al. Effect of 2-y n-3 long-chain polyunsaturated fatty acid supplementation on cognitive function in older people: a randomized, double-blind, controlled trial. *Am J Clin Nutr* 2010;91(6):1725-32.
8. ORIGIN Trial Investigators, Bosch J, Gerstein HC, et al. n-3 fatty acids and cardiovascular outcomes in patients with dysglycemia. *N Engl J Med* 2012;367(4):309-18.
9. Proudman SM, Cleland LG, Metcalf RG, et al. Plasma n-3 fatty acids and clinical outcomes in recent-onset rheumatoid arthritis. *Br J Nutr* 2015;114(6):885-90.
10. Scorletti E, Bhatia B, McCormick KG, et al. Potential benefits of purified long chain omega-3 fatty acid treatment in non-alcoholic fatty liver disease (NAFLD): A potential treatment for early NAFLD in metabolic syndrome and Type 2 diabetes. Results from the WELCOME study. *Diabet Med* 2014;31:1.
11. ASCEND Study Collaborative Group. Effects of n-3 Fatty Acid Supplements in Diabetes Mellitus. *N Engl J Med* 2018;379(16):1540-50. doi: 10.1056/NEJMoa1804989
12. Argo CK, Patrie JT, Lackner C, et al. Effects of n-3 fish oil on metabolic and histological parameters in NASH: a double-blind, randomized, placebo-controlled trial. *J Hepatol* 2015;62(1):190-97.
13. Balfego M, Canivell S, Hanzu F, et al. Effects of sardine-enriched diet on metabolic control, inflammation and gut microbiota in drug-naive patients with type 2 diabetes: a pilot randomized trial. *Lipids Health Dis* 2016;15:78. doi: DOI 10.1186/s12944-DOI 10.1016-0245-0
14. Tapsell LC, Batterham MJ, Teuss G, et al. Long-term effects of increased dietary polyunsaturated fat from walnuts on metabolic parameters in type II diabetes. *Eur J Clin Nutr* 2009;63(8):1008-15.
15. Yokoyama M, Origasa H, Matsuzaki M, et al. Effects of eicosapentaenoic acid on major coronary events in hypercholesterolaemic patients (JELIS): a randomised open-label, blinded endpoint analysis. *Lancet* 2007;369(9567):1090-98.
16. Keen H, Payan J, Allawi J, et al. Treatment of diabetic neuropathy with gamma-linolenic acid. The Gamma-Linolenic Acid Multicenter Trial Group. *Diabetes Care* 1993;16(1):8-15.
17. Vijayakumar M, Krishna S, Sundram KR, et al. What oil in patients with established coronary artery disease: outcomes of two year dietary intervention with coconut oil & sunflower oil. *Indian Heart J* 2014;66:S12.
18. Miller M, Sorkin J, Mastella L, et al. Poly is more effective than monounsaturated fat for dietary management in the metabolic syndrome: The muffin study. *J Clin Lipidol* 2016;10:996-1003.
19. Dullaart RP, Beusekamp BJ, Meijer S, et al. Long-term effects of linoleic-acid-enriched diet on albuminuria and lipid levels in type 1 (insulin-dependent) diabetic patients with elevated urinary albumin excretion. *Diabetologia* 1992;35(2):165-72.
20. Burr ML, Fehily AM, Gilbert JF, et al. Effects of changes in fat, fish, and fibre intakes on death and myocardial reinfarction: diet and reinfarction trial (DART). *Lancet* 1989;2(8666):757-61.
21. Ferrara L, Raimondi A, d'Episcopo L, et al. Olive oil and reduced need for antihypertensive medications. *Arch Intern Med* 2000;160:837-42.

22. Heine R, Mulder C, Popp-Snijders C, et al. Linoleic-acid-enriched diet: long-term effects on serum lipoprotein and apolipoprotein concentrations and insulin sensitivity in noninsulin-dependent diabetic patients. *Am J Clin Nutr* 1989;49:448-56.
23. Rose GA, Thomson WB, Williams RT. Corn oil in treatment of ischaemic heart disease. *Br Med J* 1965;1857(5449):1531-33.
24. Moore CS, Bryant SP, Mishra GD, et al. Oily fish reduces plasma triacylglycerols: a primary prevention study in overweight men and women. *Nutrition* 2006;22(10):1012-24.
25. Estruch R, Ros E, Salas-Salvadó J, et al. Retraction and republication: Primary prevention of cardiovascular disease with a Mediterranean diet. *N Engl J Med* 2013; 368:1279-90. *N Engl J Med* 2018;378:25-25.
26. Arjmandi BH, Khan DA, Juma S, et al. Whole flaxseed consumption lowers serum LDL-cholesterol and lipoprotein(a) concentrations in postmenopausal women. *Nutr Res* 1998;18(7):1203-14.
27. Abdelhamid AS, Brown TJ, Brainard JS, et al. Omega-3 fatty acids for the primary and secondary prevention of cardiovascular disease. *Cochrane Database Syst Rev* 2018;11:CD003177. doi: DOI: 10.1002/14651858.CD003177.pub4
28. Abdelhamid AS, Martin N, Bridges C, et al. Polyunsaturated fatty acids for the primary and secondary prevention of cardiovascular disease. *Cochrane Database Syst Rev* 2018;11:CD012345. doi: DOI: 10.1002/14651858.CD012345.pub3
29. Hooper L, Al-Khudairy L, Abdelhamid AS, et al. Omega-6 fats for the primary and secondary prevention of cardiovascular disease. *Cochrane Database Syst Rev* 2018;11:CD011094. doi: DOI: 10.1002/14651858.CD011094.pub4
30. Geleijnse JM, Giltay EJ, Schouten EG, et al. Effect of low doses of n-3 fatty acids on cardiovascular diseases in 4,837 post-myocardial infarction patients: design and baseline characteristics of the Alpha Omega Trial. *Am Heart J* 2010;159(4):539-46.
31. Kromhout D, Geleijnse JM, de Goede J, et al. n-3 fatty acids, ventricular arrhythmia-related events, and fatal myocardial infarction in postmyocardial infarction patients with diabetes. *Diabetes Care* 2011;34(12):2515-20.
32. Kromhout D, Giltay EJ, Geleijnse JM, et al. n-3 fatty acids and cardiovascular events after myocardial infarction. *N Engl J Med* 2010;363(18):2015-26.
33. AREDS Research Group, Chew EY, Clemons T, et al. The Age-Related Eye Disease Study 2 (AREDS2): study design and baseline characteristics (AREDS2 report number 1). *Ophthalmology* 2012;119(11):2282-89.
34. Bowman L, Aung T, Haynes R, et al. ASCEND: Design and baseline characteristics of a large randomised trial in diabetes. *Diabetes* 2012;61:A556-A57.
35. Baxheinrich A, Stratmann B, Lee-Barkey Y, et al. Effects of a rapeseed oil-enriched hypoenergetic diet with a high content of alpha-linolenic acid on body weight and cardiovascular risk profile in patients with the metabolic syndrome. *Br J Nutr* 2012;108:682-91.
36. Bonnema SJ, Jespersen LT, Marving J, et al. Supplementation with olive oil rather than fish oil increases small arterial compliance in diabetic patients. *Diabet Nutr Metab* 1995;8(2):81-87.
37. Burr ML, Ashfield-Watt PA, Dunstan FD, et al. Lack of benefit of dietary advice to men with angina: results of a controlled trial. *Eur J Clin Nutr* 2003;57(2):193-200.
38. Clark LF, Thivierge MC, Kidd CA, et al. Fish oil supplemented for 9 months does not improve glycaemic control or insulin sensitivity in subjects with impaired glucose regulation: a parallel randomised controlled trial. *Br J Nutr* 2016;115(1):75-86.
39. Connor WE, Prince MJ, Ullmann D, et al. The hypotriglyceridemic effect of fish oil in adult-onset diabetes without adverse glucose control. *Ann N Y Acad Sci* 1993;683:337-40.
40. Ullmann D, Prince MJ, Riddle M, et al. The effects of dietary fish oil versus olive oil in diabetic patients [abstract]. *Arteriosclerosis* 1990;10:881a.
41. Burr ML, Fehily AM, Rogers S, et al. Diet and reinfarction trial (DART): design, recruitment, and compliance. *Eur Heart J* 1989;10(6):558-67.
42. Fehily AM, Vaughan-Williams E, Shiels K, et al. The effect of dietary advice on nutrient intakes: Evidence from the diet and reinfarction trial (DART). *J Hum Nutr Diet* 1989;2(4):225-35.
43. Dasarathy S, Dasarathy J, Khiyami A, et al. Double blind randomized placebo controlled clinical trial of omega 3 fatty acids for the treatment of diabetic patients with nonalcoholic steatohepatitis. *J Clin Gastroenterol* 2015;49(2):137-44.
44. de Luis D, Domingo J, Izaola O, et al. Effect of DHA supplementation in a very low-calorie ketogenic diet in the treatment of obesity: a randomized clinical trial. *Endocrine* 2016;54:111-22.

45. DeFina L, Marcoux L, Devers S, et al. Effects of omega-3 supplementation in combination with diet and exercise on weight loss and body composition. *Am J Clin Nutr* 2010;doi: 10.3945/ajcn.110.002741-doi: 10.3945/ajcn.110.41.
46. Delamaire M, Durand F, Bouillaux M, et al. Influence of polyunsaturated fatty acid (MaxEPA) treatment on the haemorheological parameters of 28 IDD patients. *Diabetologia* 1991;34:A74-A74.
47. Derosa G, Maffioli P, D'Angelo A, et al. Effects of long chain omega-3 fatty acids on metalloproteinases and their inhibitors in combined dyslipidemia patients. *Expert Opin Pharmacother* 2009;10(8):1239-47.
48. Derosa G, Cicero AF, Fogari E, et al. Effects of n-3 PUFAs on postprandial variation of metalloproteinases, and inflammatory and insulin resistance parameters in dyslipidemic patients: evaluation with euglycemic clamp and oral fat load. *J Clin Lipidol* 2012;6(6):553-64.
49. Derosa G, Cicero AFG, Fogari E, et al. Effects of n-3 PUFA on insulin resistance after an oral fat load. *Eur J Lipid Sci Technol* 2011;113:950-60.
50. Blok WL, Deslypere JP, Demacker PN, et al. Pro- and anti-inflammatory cytokines in healthy volunteers fed various doses of fish oil for 1 year. *Eur J Clin Invest* 1997;27(12):1003-08.
51. Deslypere JP. Influence of supplementation with N-3 fatty acids on different coronary risk factors in men--a placebo controlled study. *Verh K Acad Geneesk Belg* 1992;54(3):189-216.
52. Katan MB, Deslypere JP, van Birgelen AP, et al. Kinetics of the incorporation of dietary fatty acids into serum cholesteryl esters, erythrocyte membranes, and adipose tissue: an 18-month controlled study. *J Lipid Res* 1997;38(10):2012-22.
53. Tokudome S, Kuriki K, Yokoyama Y, et al. Dietary n-3/long-chain n-3 polyunsaturated fatty acids for prevention of sporadic colorectal tumors: a randomized controlled trial in polypectomized participants. *Prostaglandins Leukot Essent Fatty Acids* 2015;94:1-11.
54. Tokudome S, Yokoyama Y, Kamiya T, et al. Rationale and study design of dietary intervention in patients polypectomized for tumors of the colorectum. *Jpn J Clin Oncol* 2002;32(12):550-53.
55. Einvik G, Klemsdal TO, Sandvik L, et al. A randomized clinical trial on n-3 polyunsaturated fatty acids supplementation and all-cause mortality in elderly men at high cardiovascular risk. *Eur J Cardiovasc Prev Rehabil* 2010;17(5):588-92.
56. Dodin S, Cunnane SC, Masse B, et al. Flaxseed on cardiovascular disease markers in healthy menopausal women: a randomized, double-blind, placebo-controlled trial. *Nutrition* 2008;24(1):23-30.
57. Dodin S, Lemay A, Jacques H, et al. The effects of flaxseed dietary supplement on lipid profile, bone mineral density, and symptoms in menopausal women: a randomized, double-blind, wheat germ placebo-controlled clinical trial. *J Clin Endocrinol Metab* 2005;90(3):1390-97.
58. Ebrahimi M, Ghayour-Mobarhan M, Azimi-Nezhad M, et al. Dietary supplementation of omega-3 reduced antibody titers to heat shock protein 27 in metabolic syndrome subjects. *77th Congress of the European Atherosclerosis Society, April 26–29, 2008, Istanbul, Turkey* 2008;PO29-494:138-38.
59. Ebrahimi M, Ghayour-Mobarhan M, Rezaiean S, et al. Omega-3 fatty acid supplements improve the cardiovascular risk profile of subjects with metabolic syndrome, including markers of inflammation and autoimmunity. *Acta Cardiologica* 2009;64(3):321-27.
60. Sanyal AJ, Abdelmalek MF, Suzuki A, et al. No significant effects of ethyl-eicosapentanoic acid on histologic features of nonalcoholic steatohepatitis in a phase 2 trial. *Gastroenterology* 2014;147(2):377-84.e1.
61. Danthiir V, Hosking D, Burns NR, et al. Cognitive performance in older adults is inversely associated with fish consumption but not erythrocyte membrane n-3 fatty acids. *J Nutr* 2014;144(3):311-20.
62. Fakhrzadeh H, Ghaderpanahi M, Sharifi F, et al. Fatty acids on serum lipid profiles and insulin resistance of the elderly: a randomized controlled clinical trial. *Int J Vit Nutr Res* 2010;80(2):107-16.
63. Ghaderpanahi M, Fakhrzadeh H, Sharifi F, et al. The effects of fish oil supplementation on hematologic pattern of the elderly "Kahrizak elderly study". *Iran J Diabet Lipid Disord* 2010;9:21-27.
64. Finnegan YE, Minihane AM, Leigh-Firbank EC, et al. Plant- and marine-derived n-3 polyunsaturated fatty acids have differential effects on fasting and postprandial blood lipid concentrations and on the susceptibility of LDL to oxidative modification in moderately hyperlipidemic subjects. *Am J Clin Nutr* 2003;77(4):783-95.
65. Gill EA, Chen MA, Paramsothy P, et al. Omega-3 fatty acids effects on carotid IMT in metabolic syndrome. *Circulation Conference: American Heart Association's* 2014;130(no pagination)
66. Gill EA, Chen MA, Thirumalai A, et al. Omega-3 fatty acids improve dyslipidemia but not inflammatory markers in metabolic syndrome. *J Clin Lipidol* 2012;6 (3):278-79.
67. GISSI-Prevenzione Investigators. Dietary supplementation with n-3 polyunsaturated fatty acids and vitamin E after myocardial infarction: results of the GISSI-Prevenzione trial. *Lancet* 1999;354:447-55.

68. Marchioli R. Treatment with n-3 polyunsaturated fatty acids after myocardial infarction: results of GISSI-Prevenzione Trial. *European heart journal supplements* 2001;3(Supplement D):D85-d97.
69. Keen H, Payan J, Allawi J, et al. Treatment of diabetic neuropathy with gamma-linolenic acid. The gamma-Linolenic Acid Multicenter Trial Group. *Diabetes Care* 1993;16(1):8-15.
70. Tan SY. Dietary manipulation and weight management. Doctor of Philosophy thesis, School of Health Sciences, University of Wollonong, 2010.
71. Houtsmuller AJ, Van Hal-Ferwerda J, Zahn KJ, et al. Favourable influences of linoleic acid on the progression of diabetic micro- and macroangiopathy. *Nutr Metab* 1980;24(SUPPL. 1):105-18.
72. Houtsmuller AJ, van Hal-Ferwerda J, Zahn KJ, et al. Favorable influences of linoleic acid on the progression of diabetic micro- and macroangiopathy in adult onset diabetes mellitus. *Prog Lipid Res* 1981;20:377-86.
73. Houtsmuller AJ, van Hal-Ferwerda J, Zahn KJ, et al. Influence of different diets on the progression of diabetic retinopathy. *Prog Food Nutr Science* 1980;4(5):41-46.
74. Houtsmuller AJ, Zahn KJ, Henkes HE. Unsaturated fats and progression of diabetic retinopathy. *Documenta Ophthalmologia* 1979;48(2):363-71.
75. Patti L, Maffettone A, Iovine C, et al. Long-term effects of fish oil on lipoprotein subfractions and low density lipoprotein size in non-insulin-dependent diabetic patients with hypertriglyceridemia. *Atherosclerosis* 1999;146:361-67.
76. Rivellese A, Maffettone A, Iovine C, et al. Long-term effects of fish oil on insulin resistance and plasma lipoproteins in NIDDM patients with hypertriglyceridemia. *Diabetes Care* 1996;19(11):1207-2013.
77. Sirtori C, Crepaldi G, Manzato E, et al. One-year treatment with ethyl esters of n-3 fatty acids in patients with hypertriglyceridemia and glucose intolerance. Reduced triglyceridemia, total cholesterol and increased HDL-C without glycemic alterations. *Atherosclerosis* 1998;137:419-27.
78. Yokoyama M, Origasa H, for the Jelis Investigators. Effects of eicosapentaenoic acid on cardiovascular events in Japanese patients with hypercholesterolaemia: Rationale, design, and baseline characteristics of the Japan EPA Lipid Intervention Study (JELIS). *Am Heart J* 2003;146:613-20.
79. Yokoyama M, Origasa H, Matsuzaki M, et al. Effects of eicosapentaenoic acid on major coronary events in hypercholesterolaemic patients (JELIS): a randomised open-label, blinded endpoint analysis. [Erratum appears in Lancet. 2007 Jul 21;370(9583):220]. *Lancet* 2007;369(9567):1090-98.
80. Krebs J, Browning L, McLean N, et al. Additive benefits of long-chain n-3 polyunsaturated fatty acids and weight-loss in the management of cardiovascular disease risk in overweight hyperinsulinaemic women. *Int J Obes (Lond)* 2006;30:1535-44.
81. Lalia AZ, Johnson ML, Jensen MD, et al. Effects of Dietary n-3 Fatty Acids on Hepatic and Peripheral Insulin Sensitivity in Insulin-Resistant Humans. *Diabetes Care* 2015;38(7):1228-37.
82. Martinez GL, Koury JC, Martins MA, et al. Serum level changes of long chain-polyunsaturated fatty acids in patients undergoing periodontal therapy combined with one year of omega-3 supplementation: a pilot randomized clinical trial. *J Periodontal Implant Sci* 2014;44(4):169-77.
83. Le T, Flatt SW, Natarajan L, et al. Effects of Diet Composition and Insulin Resistance Status on Plasma Lipid Levels in a Weight Loss Intervention in Women. *J Am Heart Assoc* 2016;5(1):e002771-e71.
84. Rock CL, Flatt SW, Pakiz B, et al. Effects of diet composition on weight loss, metabolic factors and biomarkers in a 1-year weight loss intervention in obese women examined by baseline insulin resistance status. *Metabolism* 2016;65(11):1605-13.
85. Mita T, Watada H, Ogihara T, et al. Eicosapentaenoic acid reduces the progression of carotid intima-media thickness in patients with type 2 diabetes. *Atherosclerosis* 2007;191(1):162-67.
86. Cantin J, Lacroix S, Latour E, et al. Reproducibility and relative validity of a mediterranean food frequency questionnaire developed for the population of Quebec at the montreal heart institute's prevention center. *J Nutrigenetics Nutrigenomics* 2013;6 (4-5):209.
87. Niki T, Wakatsuki T, Yamaguchi K, et al. Effects of the addition of eicosapentaenoic acid to strong statin therapy on inflammatory cytokines and coronary plaque components assessed by integrated backscatter intravascular ultrasound. *Circ J* 2016;80(2):450-60.
88. Nodari S, Triggiani M, Campia U, et al. Effects of n-3 polyunsaturated fatty acids on left ventricular function and functional capacity in patients with dilated cardiomyopathy. *J Am Coll Cardiol* 2011;57(7):870-79.
89. Nogueira M, Oliveira C, Alves V, et al. Omega-3 polyunsaturated fatty acids in treating non-alcoholic steatohepatitis: A randomized, double-blind, placebo-controlled trial. *Clinical Nutrition* 2016;35:578-86.
90. Nogueira MA, Alves VAF, Stefano JT, et al. Effects of omega-3 polyunsaturated fatty acids (PUFA) from fish and flaxseed oils on nonalcoholic steatohepatitis (NASH). *J Hepatol* 2013;58:S544.

91. Nomura S, Inami N, Shouzu A, et al. The effects of pitavastatin, eicosapentaenoic acid and combined therapy on platelet-derived microparticles and adiponectin in hyperlipidemic, diabetic patients. *Platelets* 2009;20(1):16-22.
92. Natvig H. [The effect of unsaturated fatty acids on the incidence of coronary infarction, etc]. *Tidsskr Nor Laegeforen* 1967;87(11):1033-41.
93. Natvig H, Borchgrevink CF, Dedichen J, et al. A controlled trial of the effect of linolenic acid on incidence of coronary heart disease. The Norwegian vegetable oil experiment of 1965-66. *Scandinavian Journal of Clinical and Laboratory Investigation Supplement* 1968;105:1-20.
94. Nilsen DW, Albrektsen G, Landmark K, et al. Effects of a high-dose concentrate of n-3 fatty acids or corn oil introduced early after an acute myocardial infarction on serum triacylglycerol and HDL cholesterol. *Am J Clin Nutr* 2001;74(1):50-56.
95. Dangour A. The OPAL study: Older people and n-3 long chain polyunsaturated fatty acids. *Curr Controlled Trials* 2005
96. Dangour AD, Clemens F, Elbourne D, et al. A randomised controlled trial investigating the effect of n-3 long-chain polyunsaturated fatty acid supplementation on cognitive and retinal function in cognitively healthy older people: the Older People And n-3 Long-chain polyunsaturated fatty acids (OPAL) study protocol [ISRCTN72331636]. *Nutr J* 2006;5:20-20.
97. Dangour AD, Allen E, Elbourne D, et al. Fish consumption and cognitive function among older people in the UK: baseline data from the OPAL study. *J Nutr Health Aging* 2009;13(3):198-202.
98. Griffin M, Sanders T, Davies I, et al. Effects of altering the ratio of dietary n6 to n3 fatty acids on insulin sensitivity, lipoprotein size, and postprandial lipemia in men and postmenopausal women aged 45–70 y: the OPTILIP Study. *Am J Clin Nutr* 2006;84:1290-98.
99. Sanders T, Lewis F, Slaughter S, et al. Effect of varying the ratio of n6 to n3 fatty acids by increasing the dietary intake of -linolenic acid, eicosapentaenoic and docosahexaenoic acid, or both on fibrinogen and clotting factors VII and XII in persons aged 45–70 y: the OPTILIP Study. *Am J Clin Nutr* 2006;84:513-22.
100. Origin Trial Investigators, Gerstein H, Yusuf S, et al. Rationale, design, and baseline characteristics for a large international trial of cardiovascular disease prevention in people with dysglycemia: the ORIGIN Trial (Outcome Reduction with an Initial Glargine Intervention). *Am Heart J* 2008;155(1):26-32, 32.
101. Investigators OT, Bosch J, Gerstein HC, et al. n-3 fatty acids and cardiovascular outcomes in patients with dysglycemia. *N Engl J Med* 2012;367(4):309-18.
102. Investigators OT, Gerstein HC, Bosch J, et al. Basal insulin and cardiovascular and other outcomes in dysglycemia. *N Engl J Med* 2012;367(4):319-28.
103. Maggioni AP, Fabbri G, Bosch J, et al. Effects of n-3 fatty acids on long-term outcomes of high risk patients with type 2 diabetes mellitus or IGF/IGT with a recent myocardial infarction. *Eur Heart J* 2013;34:352-52.
104. Tatsuno I, Saito Y, Kudou K, et al. Long-term safety and efficacy of TAK-085 in Japanese subjects with hypertriglyceridemia undergoing lifestyle modification: the omega-3 fatty acids randomized long-term (ORL) study. *J Clin Lipidol* 2013;7(6):615-25.
105. Murphy KJ, Meyer BJ, Mori TA, et al. Impact of foods enriched with n-3 long-chain polyunsaturated fatty acids on erythrocyte n-3 levels and cardiovascular risk factors. *Br J Nutr* 2007;97(4):749-57.
106. Patch CS, Tapsell LC, Mori TA, et al. The use of novel foods enriched with long-chain n-3 fatty acids to increase dietary intake: a comparison of methodologies assessing nutrient intake. *J Am Diet Assoc* 2005;105(12):1918-26.
107. Kowey PR, Reiffel JA, Ellenbogen KA, et al. Efficacy and safety of prescription omega-3 fatty acids for the prevention of recurrent symptomatic atrial fibrillation: a randomized controlled trial. *JAMA* 2010;304(21):2363-72.
108. Pratt CM, Reiffel JA, Ellenbogen KA, et al. Efficacy and safety of prescription omega-3-acid ethyl esters for the prevention of recurrent symptomatic atrial fibrillation: a prospective study. *Am Heart J* 2009;158(2):163-69.
109. Alvarez-Perez J, Sanchez-Villegas A, Diaz-Benitez EM, et al. Influence of a Mediterranean Dietary Pattern on Body Fat Distribution: Results of the PREDIMED-Canarias Intervention Randomized Trial. *J Am Coll Nutr* 2016:1-13.
110. Babio N, Toledo E, Estruch R, et al. Mediterranean diets and metabolic syndrome status in the PREDIMED randomized trial. *Cmaj* 2014;186(17):E649-E57.
111. Damasceno NR, Sala-Vila A, Cofan M, et al. Mediterranean diet supplemented with nuts reduces waist circumference and shifts lipoprotein subfractions to a less atherogenic pattern in subjects at high cardiovascular risk. *Atherosclerosis* 2013;230(2):347-53.



112. Domenech M, Estruch R, Ros E, et al. Effect of the mediterranean diet on blood pressure: The ambulatory blood pressure substudy (Predimed-ABPM). *J Hypertens* 2010;28:e373.
113. Domenech M, Roman P, Lapetra J, et al. Mediterranean diet reduces 24-hour ambulatory blood pressure, blood glucose, and lipids: one-year randomized, clinical trial. *Hypertension* 2014;64(1):69-76.
114. Estruch R, Ros E, Salas-Salvado J, et al. Primary prevention of cardiovascular disease with a Mediterranean diet.[RETRACTED and republished as Estruch 2018, Erratum appears in N Engl J Med. 2014 Feb 27;370(9):886]. *N Engl J Med* 2013;368(14):1279-90.
115. Estruch R, Ros E, Salas-Salvadó J, et al. Primary prevention of cardiovascular disease with a Mediterranean diet supplemented with extra-virgin olive oil or nuts. *N Engl J Med* 2018;378:e34-e34.
116. Martínez-González MÁ, Corella D, Salas-Salvadó J, et al. Cohort profile: design and methods of the PREDIMED study. *Int J Epidemiol* 2012;41(2):377-85.
117. Razquin C, Martinez JA, Martinez-Gonzalez MA, et al. A 3 years follow-up of a Mediterranean diet rich in virgin olive oil is associated with high plasma antioxidant capacity and reduced body weight gain. *Eur J Clin Nutr* 2009;63(12):1387-93.
118. Salas-Salvado J, Bullo M, Estruch R, et al. Prevention of diabetes with Mediterranean diets: a subgroup analysis of a randomized trial. *Ann Intern Med* 2014;160(1):1-10.
119. Salas-Salvado J, Fernandez-Ballart J, Ros E, et al. Effect of a Mediterranean diet supplemented with nuts on metabolic syndrome status: one-year results of the PREDIMED randomized trial. *Arch Intern Med* 2008;168(22):2449-58.
120. Toledo E, Hu FB, Estruch R, et al. Effect of the Mediterranean diet on blood pressure in the PREDIMED trial: results from a randomized controlled trial. *BMC Medicine* 2013;11:207.
121. PREDIMED STUDY - MEDITERRANEAN DIET IN THE PRIMARY PREVENTION OF CARDIOVASCULAR DISEASE: Research Protocol. Version 1. [http://www.predimed.es/uploads/8/0/5/1/8051451/\\_1estr\\_protocol\\_olpdf](http://www.predimed.es/uploads/8/0/5/1/8051451/_1estr_protocol_olpdf), 2013.
122. Carlisle JB. Data fabrication and other reasons for non-random sampling in 5087 randomised, controlled trials in anaesthetic and general medical journals. *Anaesthesia* 2017;72:944-52.
123. Proudman S, Spargo L, Hall C, et al. Fish oil in rheumatoid arthritis: a randomised, double blind trial comparing high dose with low dose. *Intern Med J* 2012;42(Suppl 1):2-3.
124. Proudman SM, James MJ, Spargo LD, et al. Fish oil in recent onset rheumatoid arthritis: a randomised, double-blind controlled trial within algorithm-based drug use. *Ann Rheum Dis* 2015;74(1):89-95.
125. Bhatt DL, Steg G, Brinton EA, et al. Rationale and design of REDUCE-IT: Reduction of Cardiovascular Events with Icosapent Ethyl—Intervention Trial. *Clinical Cardiology* 2017;40:138-48.
126. Bhatt DL, Steg PG, Miller M, et al. Cardiovascular Risk Reduction with Icosapent Ethyl for Hypertriglyceridemia. *N Engl J Med* 2018 doi: 10.1056/NEJMoa1812792
127. Rischio, Prevenzione I. Efficacy of n-3 polyunsaturated fatty acids and feasibility of optimizing preventive strategies in patients at high cardiovascular risk: rationale, design and baseline characteristics of the Rischio and Prevenzione study, a large randomised trial in general practice. *Trials* 2010;11:68.
128. Roncaglioni MC, Tombesi M, Avanzini F, et al. N-3 fatty acids in patients with multiple cardiovascular risk factors. *N Engl J Med* 2013;368(19):1800-08. doi: 10.1056/NEJMoa1205409
129. Myrup B, Rossing P, Jensen T, et al. Lack of effect of fish oil supplementation on coagulation and transcapillary escape rate of albumin in insulin-dependent diabetic patients with diabetic nephropathy. *Scand J Clin Lab Invest* 2001;61(5):349-56.
130. Rossing P, Hansen BV, Nielsen FS, et al. Fish oil in diabetic nephropathy. *Diabetes Care* 1996;19(11):1214-19.
131. Sandhu N, Schetter SE, Liao J, et al. Influence of Obesity on Breast Density Reduction by Omega-3 Fatty Acids: Evidence from a Randomized Clinical Trial. *Cancer Prev Res* 2016;9(4):275-82.
132. Signori C, DuBrock C, Richie JP, et al. Administration of omega-3 fatty acids and Raloxifene to women at high risk of breast cancer: interim feasibility and biomarkers analysis from a clinical trial. *Eur J Clin Nutr* 2012;66(8):878-84.
133. Sasaki J, Miwa T, Odawara M. Administration of highly purified eicosapentaenoic acid to statin-treated diabetic patients further improves vascular function. *Endocr J* 2012;59(4):297-304.
134. Sawada T, Tsubata H, Hashimoto N, et al. Effects of 6-month eicosapentaenoic acid treatment on postprandial hyperglycemia, hyperlipidemia, insulin secretion ability, and concomitant endothelial dysfunction among newly diagnosed impaired glucose metabolism patients with coronary artery disease. An open label, single blinded, prospective randomized controlled trial. *Cardiovasc Diabetol* 2016;15(1):121. doi: DOI 10.1186/s12933-016-0437-y

135. Schirmer MA, Phinney SD. Gamma-linolenate reduces weight regain in formerly obese humans. *J Nutr* 2007;137(6):1430-35.
136. Shimizu H, Ohtani K, Tanaka Y, et al. Long-term effect of eicosapentaenoic acid ethyl (EPA-E) on albuminuria of non-insulin dependent diabetic patients. *Diabetes Res Clin Pract* 1995;28(1):35-40.
137. Eritsland J, Arnesen H, Berg K, et al. Serum Lp(a) lipoprotein levels in patients with coronary artery disease and the influence of long-term n-3 fatty acid supplementation. *Scand J Clin Lab Invest* 1995;55(4):295-300.
138. Eritsland J, Arnesen H, Gronseth K, et al. Effect of dietary supplementation with n-3 fatty acids on coronary artery bypass graft patency. *Am J Cardiol* 1996;77(1):31-36.
139. Eritsland J, Arnesen H, Gronseth K, et al. Effect of supplementation with n-3 fatty acids on graft patency in patients undergoing coronary artery bypass operation. Results from SHOT study [abstract]. *Eur Heart J* 1994;15:29-29.
140. Eritsland J, Arnesen H, Seljeflot I, et al. Long-term metabolic effects of n-3 polyunsaturated fatty acids in patients with coronary artery disease. *Am J Clin Nutr* 1995;61(4):831-36.
141. Eritsland J, Arnesen H, Seljeflot I, et al. Long-term effects of n-3 polyunsaturated fatty acids on haemostatic variables and bleeding episodes in patients with coronary artery disease. *Blood Coagul Fibrinolysis* 1995;6(1):17-22.
142. Eritsland J, Seljeflot I, Abdelnoor M, et al. Long-term influence of omega-3 fatty acids on fibrinolysis, fibrinogen, and serum lipids. *Fibrinolysis* 1994;8(2):120-25.
143. Eritsland J, Seljeflot I, Abdelnoor M, et al. Long-term effects of n-3 fatty acids on serum lipids and glycaemic control. *Scand J Clin Lab Invest* 1994;54(4):273-80.
144. Eritsland J, Seljeflot I, Arnesen H, et al. Long-term effects of fish oil supplementation in patients with coronary artery disease: influence on lipoproteins, coagulation and fibrinolysis [abstract]. *Thromb Res* 1992;65:75.
145. Eritsland J, Seljeflot I, Arnesen H, et al. Long-term influence of omega-3 fatty acids on fibrinolysis, fibrinogen, and serum lipids [abstract]. *Thromb Haemost* 1993;69:1065-65.
146. Eritsland J, Seljeflot I, Arnesen H, et al. Effect of long-term, moderate-dose supplementation with omega-3 fatty acids on monocyte procoagulant activity and release of interleukin-6 in patients with coronary artery disease. *Thromb Res* 1995;77(4):337-46.
147. Anil S, Charlton KE, Tapsell LC, et al. Identification of dietary patterns associated with blood pressure in a sample of overweight Australians. *J Hum Hypertens* 2016;30(11):672-78.
148. Tapsell LC, Batterham MJ, Charlton KE. Effect of dietary restriction and n-3PUFA supplementation on insulin resistance in obese adults. *FASEB Journal Conference: Experimental Biology* 2010;24(no pagination)
149. Tapsell LC, Batterham MJ, Charlton KE, et al. Foods, nutrients or whole diets: effects of targeting fish and LCn3PUFA consumption in a 12mo weight loss trial. *BMC Public Health* 2013;13:1231-31.
150. Smith GI, Jullian S, Reeds DN, et al. Fish oil-derived n-3 PUFA therapy increases muscle mass and function in healthy older adults. *Am J Clin Nutr* 2015;102(1):115-22.
151. Sofi F, Giangrandi I, Cesari F, et al. Effects of a 1-year dietary intervention with n-3 polyunsaturated fatty acid-enriched olive oil on non-alcoholic fatty liver disease patients: a preliminary study. *Int J Food Sci Nutr* 2010;61(8):792-802.
152. Spadaro L, Magliocco O, Spampinato D, et al. Effects of n-3 polyunsaturated fatty acids in subjects with nonalcoholic fatty liver disease. *Dig Liver Dis* 2008;40(3):194-99.
153. Tande KS, Vo TD, Lynch BS. Clinical safety evaluation of marine oil derived from *Calanus finmarchicus*. *Regul Toxicol Pharmacol* 2016;80:25-31.
154. Gillen LJ, Tapsell LC, Patch CS, et al. Structured dietary advice incorporating walnuts achieves optimal fat and energy balance in patients with type 2 diabetes mellitus. *J Am Diet Assoc* 2005;105(7):1087-96.
155. Tapsell LC, Gillen LJ, Patch CS, et al. Including walnuts in a low-fat/modified-fat diet improves HDL cholesterol-to-total cholesterol ratios in patients with type 2 diabetes. *Diabetes Care* 2004;27(12):2777-83.
156. Tardivo AP, Nahas-Neto J, Orsatti CL, et al. Effects of omega-3 on metabolic markers in postmenopausal women with metabolic syndrome. *Climacteric* 2015;18(2):290-98.
157. Tuttle KR, Shuler LA, Packard DP, et al. Comparison of low-fat versus Mediterranean-style dietary intervention after first myocardial infarction (from The Heart Institute of Spokane Diet Intervention and Evaluation Trial). *Am J Cardiol* 2008;101(11):1523-30.
158. Veleba J, Kopecky J, Jr., Janovska P, et al. Combined intervention with pioglitazone and n-3 fatty acids in metformin-treated type 2 diabetic patients: improvement of lipid metabolism. *Nutr Metab* 2015;12:52.
159. Nandakumar S, Vijayakumar M, Krishnan S. Coconut oil Vs Sunfloweroil in atherosclerosis-Challenges in dietary intervention. *Indian Heart J* 2014;66:S11.

160. Vijayakumar M, Vasudevan DM, Sundaram KR, et al. A randomized study of coconut oil versus sunflower oil on cardiovascular risk factors in patients with stable coronary heart disease. *Indian Heart J* 2016;68:498-506.
161. Wang F, Wang Y, Zhu Y, et al. Treatment for 6 months with fish oil-derived n-3 polyunsaturated fatty acids has neutral effects on glycemic control but improves dyslipidemia in type 2 diabetic patients with abdominal obesity: a randomized, double-blind, placebo-controlled trial. *Eur J Nutr* 2016;DOI 10.1007/s00394-016-1352-4
162. Bhatia L, Scorletti E, Curzen N, et al. Improvement in non-alcoholic fatty liver disease severity is associated with a reduction in carotid intima-media thickness progression. *Atherosclerosis* 2016;246:13-20.
163. Clough GF, McCormick KG, Scorletti E, et al. Higher body fat percentage is associated with enhanced temperature perception in NAFLD: results from the randomised Wessex Evaluation of fatty Liver and Cardiovascular markers in NAFLD with OMacor thErapy trial (WELCOME) trial. *Diabetologia* 2016;59(7):1422-29.
164. McCormick KG, Scorletti E, Bhatia L, et al. Impact of high dose n-3 polyunsaturated fatty acid treatment on measures of microvascular function and vibration perception in non-alcoholic fatty liver disease: results from the randomised WELCOME trial. *Diabetologia* 2015;58(8):1916-25.
165. Scorletti E, Bhatia L, McCormick KG, et al. Design and rationale of the WELCOME trial: A randomised, placebo controlled study to test the efficacy of purified long chain omega-3 fatty acid treatment in non-alcoholic fatty liver disease. *Contemp Clin Trials* 2014;37(2):301-11.
166. Scorletti E, West AL, Bhatia L, et al. Treating liver fat and serum triglyceride levels in NAFLD, effects of PNPLA3 and TM6SF2 genotypes: Results from the WELCOME trial. *J Hepatol* 2015;63(6):1476-83.
167. Kulzow N, Witte AV, Kerti L, et al. Impact of Omega-3 Fatty Acid Supplementation on Memory Functions in Healthy Older Adults. *J Alzheimers Dis* 2016;51(3):713-25.
168. Witte AV, Kerti L, Hermannstadter HM, et al. Long-chain omega-3 fatty acids improve brain function and structure in older adults. *Cereb Cortex* 2014;24(11):3059-68.
169. Witte V, Kerti L, Floel A. Effects of omega-3 supplementation on brain structure and function in healthy elderly subjects. *Alzheimer's dement* 2012;1):441.
170. Li D, Zheng JS, Lin M, et al. Change of plasma metabolites in response to omega-3 fatty acids in Chinese patients with type 2 diabetes: A double-blinded randomized controlled trial. *FASEB Journal Conference: Experimental Biology* 2015;29(1 Meeting Abstracts)
171. Zheng JS, Lin M, Fang L, et al. Effects of n-3 fatty acid supplements on glycemic traits in Chinese type 2 diabetic patients: A double-blind randomized controlled trial. *Mol Nutr Food Res* 2016;9:9-9.
172. Zheng JS, Lin M, Imamura F, et al. Serum metabolomics profiles in response to n-3 fatty acids in Chinese patients with type 2 diabetes: a double-blind randomised controlled trial. *Sci* 2016;6:29522-22.
